# Supplementary material for: Overexpressing the Sedum alfredii Cu/Zn Superoxide Dismutase Increased Resistance to Oxidative Stress in Transgenic Arabidopsis
Source: Front Plant Sci. 2017 Jun 13;8:1010. doi: 10.3389/fpls.2017.01010 (PMC5469215; doi:10.3389/fpls.2017.01010)
Supplement: TABLE S2 — Differentially expressed genes that are up- and down-regulated at least 2-fold in SaCn/Zn SOD transgenic Arabidopsis compared with WT plants under CdCl2 stress. [file Table_2.XLSX]

## Sheet: 0 W
ProbeName	FC ([2w TG] vs [2w WT])	Log FC ([2w TG] vs [2w WT])	FC (abs) ([2w TG] vs [2w WT])	Regulation ([2w TG] vs [2w WT])	GeneSymbol	Description
A_84_P844437	-4.33975	-2.11761	4.33975	down	AT4G11450	Arabidopsis thaliana uncharacterized protein (AT4G11450) mRNA, complete cds [NM_117216]
A_84_P851423	-2.09647	-1.06797	2.09647	down	AT4G32440	Arabidopsis thaliana tudor-like RNA-binding protein (AT4G32440) mRNA, complete cds [NM_202931]
A_84_P759826	-2.07216	-1.05113	2.07216	down	AT3G11950	Arabidopsis thaliana homogentisate solanesyltransferase (AT3G11950) mRNA, complete cds [NM_001202936]
A_84_P13114	-2.72415	-1.4458	2.72415	down	HCF106	Arabidopsis thaliana Bacterial sec-independent translocation protein mttA/Hcf106 (HCF106) mRNA, complete cds [NM_124623]
A_84_P216048	-2.64401	-1.40273	2.64401	down	AT1G70600	Arabidopsis thaliana 60S ribosomal protein L27a-3 (AT1G70600) mRNA, complete cds [NM_105728]
A_84_P225689	-5.14937	-2.3644	5.14937	down	AT1G49360	Arabidopsis thaliana F-box protein (AT1G49360) mRNA, complete cds [NM_103826]
A_84_P861344	-2.13418	-1.09369	2.13418	down	FNR1	Arabidopsis thaliana ferredoxin--NADP+ reductase (FNR1) mRNA, complete cds [NM_001085336]
A_84_P842536	-6.43704	-2.6864	6.43704	down		Arabidopsis thaliana Full-length cDNA Complete sequence from clone GSLTPGH15ZD09 of Hormone Treated Callus of strain col-0 of Arabidopsis thaliana (thale cress) [BX815895]
A_84_P55070	-2.12195	-1.08539	2.12195	down	AT4G13030	Arabidopsis thaliana P-loop containing nucleoside triphosphate hydrolase domain-containing protein (AT4G13030) mRNA, complete cds [NM_179040]
A_84_P843637	-2.39369	-1.25924	2.39369	down	AT2G26310	Arabidopsis thaliana chalcone-flavanone isomerase-like protein (AT2G26310) mRNA, complete cds [NM_001202677]
A_84_P14283	-2.83117	-1.5014	2.83117	down	CVP2	Arabidopsis thaliana Type I inositol-1,4,5-trisphosphate 5-phosphatase CVP2 (CVP2) mRNA, complete cds [NM_100426]
A_84_P12356	-3.1006	-1.63255	3.1006	down	CPISCA	Arabidopsis thaliana Iron-sulfur assembly protein IscA (CPISCA) mRNA, complete cds [NM_100924]
A_84_P787759	-5.32555	-2.41293	5.32555	down	AT3G57810	Arabidopsis thaliana Cysteine proteinases-like protein (AT3G57810) mRNA, complete cds [NM_180385]
A_84_P816283	-2.00856	-1.00616	2.00856	down	AT1G53280	Arabidopsis thaliana 4-methyl-5(b-hydroxyethyl)-thiazole monophosphate biosynthesis (AT1G53280) mRNA, complete cds [NM_104206]
A_84_P14198	-2.68136	-1.42297	2.68136	down	AT1G67400	Arabidopsis thaliana ELMO/CED-12 domain-containing protein (AT1G67400) mRNA, complete cds [NM_105407]
A_84_P15740	-2.07897	-1.05587	2.07897	down	FADA	Arabidopsis thaliana fatty acid desaturase A (FADA) mRNA, complete cds [NM_118837]
A_84_P290774	-6.10563	-2.61014	6.10563	down	HB25	Arabidopsis thaliana homeobox protein 25 (HB25) mRNA, complete cds [NM_125939]
A_84_P806626	-2.00539	-1.00388	2.00539	down	ATMS1	Arabidopsis thaliana 5-methyltetrahydropteroyltriglutamate--homocysteine methyltransferase (ATMS1) mRNA, complete cds [NM_001085130]
A_84_P16067	-2.13786	-1.09617	2.13786	down	AT1G19130	Arabidopsis thaliana uncharacterized protein (AT1G19130) mRNA, complete cds [NM_101771]
A_84_P788002	-2.00234	-1.00169	2.00234	down	AT1G58025	Arabidopsis thaliana DNA-binding bromodomain-containing protein (AT1G58025) mRNA, complete cds [NM_001198329]
A_84_P195794	-4.16862	-2.05957	4.16862	down	AT4G19390	Arabidopsis thaliana uncharacterized protein (AT4G19390) mRNA, complete cds [NM_118059]
A_84_P806384	-2.50819	-1.32664	2.50819	down	AT2G05510	Arabidopsis thaliana glycine-rich protein (AT2G05510) mRNA, complete cds [NM_001036257]
A_84_P18350	-2.27223	-1.18411	2.27223	down	AT3G23600	Arabidopsis thaliana dienelactone hydrolase family protein (AT3G23600) mRNA, complete cds [NM_113263]
A_84_P753401	-2.50954	-1.32742	2.50954	down		Arabidopsis thaliana Full-length cDNA Complete sequence from clone GSLTLS42ZH01 of Adult vegetative tissue of strain col-0 of Arabidopsis thaliana (thale cress) [BX841821]
A_84_P202428	-2.12497	-1.08744	2.12497	down	AT5G64880	Arabidopsis thaliana uncharacterized protein (AT5G64880) mRNA, complete cds [NM_125886]
A_84_P14519	-2.19626	-1.13505	2.19626	down	AT3G03680	Arabidopsis thaliana C2 and plant phosphoribosyltransferase domain-containing protein (AT3G03680) mRNA, complete cds [NM_111239]
A_84_P823905	-2.07539	-1.05338	2.07539	down	AT4G27860	Arabidopsis thaliana vacuolar iron transporter-like protein (AT4G27860) mRNA, complete cds [NM_118924]
A_84_P22136	-8.95827	-3.16322	8.95827	down	AHP4	Arabidopsis thaliana histidine-containing phosphotransfer protein 4 (AHP4) mRNA, complete cds [NM_112507]
A_84_P16698	-17.2081	-4.10501	17.2081	down	AT4G29700	Arabidopsis thaliana alkaline-phosphatase-like protein (AT4G29700) mRNA, complete cds [NM_119115]
A_84_P769702	-2.12314	-1.0862	2.12314	down		Rep: Photosystem I assembly protein ycf3 - Arabidopsis thaliana (Mouse-ear cress), partial (75%) [TC390198]
A_84_P115272	-6.0442	-2.59555	6.0442	down	AT4G14200	Arabidopsis thaliana pentatricopeptide repeat-containing protein-like protein (AT4G14200) mRNA, complete cds [NM_117497]
A_84_P19468	-3.14747	-1.65419	3.14747	down	AT4G09890	Arabidopsis thaliana uncharacterized protein (AT4G09890) mRNA, complete cds [NM_117057]
A_84_P819904	-2.25298	-1.17184	2.25298	down	USP	Arabidopsis thaliana UDP-sugar pyrophosphorylase (USP) mRNA, complete cds [NM_124635]
A_84_P757473	-3.38903	-1.76087	3.38903	down	RAD51B	Arabidopsis thaliana DNA repair protein RAD51-like 2 (RAD51B) mRNA, complete cds [NM_128416]
A_84_P24073	-2.81542	-1.49335	2.81542	down	CYP81D1	Arabidopsis thaliana cytochrome P450 CYP81D11 (CYP81D1) mRNA, complete cds [NM_113795]
A_84_P13518	-4.93706	-2.30365	4.93706	down	JMT	Arabidopsis thaliana jasmonic acid carboxyl methyltransferase (JMT) mRNA, complete cds [NM_101820]
A_84_P12777	-2.23185	-1.15824	2.23185	down	MEE40	Arabidopsis thaliana pentatricopeptide repeat-containing protein (MEE40) mRNA, complete cds [NM_115230]
A_84_P583222	-4.12613	-2.04479	4.12613	down	AT4G36925	Arabidopsis thaliana uncharacterized protein (AT4G36925) mRNA, complete cds [NM_148405]
A_84_P94769	-4.0826	-2.02949	4.0826	down	FLA16	Arabidopsis thaliana fasciclin-like arabinogalactan protein 16 (FLA16) mRNA, complete cds [NM_179922]
A_84_P765082	-2.0639	-1.04537	2.0639	down		Arabidopsis thaliana Full-length cDNA Complete sequence from clone GSLTLS51ZE09 of Adult vegetative tissue of strain col-0 of Arabidopsis thaliana (thale cress) [BX827411]
A_84_P855885	-4.27969	-2.09751	4.27969	down	AT5G37790	Arabidopsis thaliana protein kinase family protein (AT5G37790) mRNA, complete cds [NM_123138]
A_84_P751278	-9.72944	-3.28236	9.72944	down		Arabidopsis thaliana Full-length cDNA Complete sequence from clone GSLTPGH15ZD09 of Hormone Treated Callus of strain col-0 of Arabidopsis thaliana (thale cress) [BX815895]
A_84_P19233	-3.04713	-1.60745	3.04713	down	FAD3	Arabidopsis thaliana omega-3 fatty acid desaturase, endoplasmic reticulum (FAD3) mRNA, complete cds [NM_179808]
A_84_P12061	-2.55445	-1.35301	2.55445	down	MIPS3	Arabidopsis thaliana myo-inositol-1-phosphate synthase (MIPS3) mRNA, complete cds [NM_121055]
A_84_P588609	-2.86864	-1.52037	2.86864	down	FZR3	Arabidopsis thaliana protein FIZZY-related 3 (FZR3) mRNA, complete cds [NM_121387]
A_84_P22225	-6.28565	-2.65206	6.28565	down	IMK2	Arabidopsis thaliana probably inactive leucine-rich repeat receptor-like protein kinase IMK2 (IMK2) mRNA, complete cds [NM_115033]
A_84_P815049	-2.34991	-1.2326	2.34991	down	AT1G76010	Arabidopsis thaliana Alba DNA/RNA-binding protein (AT1G76010) mRNA, complete cds [NM_106249]
A_84_P194504	-2.34458	-1.22933	2.34458	down	CLE25	Arabidopsis thaliana protein CLAVATA3/ESR-related 25 (CLE25) mRNA, complete cds [NM_148758]
A_84_P20743	-2.86597	-1.51902	2.86597	down	AT5G15740	Arabidopsis thaliana O-fucosyltransferase family protein (AT5G15740) mRNA, complete cds [NM_121579]
A_84_P811645	-3.97625	-1.99141	3.97625	down	TPI	Arabidopsis thaliana triosephosphate isomerase (TPI) mRNA, complete cds [NM_115402]
A_84_P89979	-3.34816	-1.74337	3.34816	down	SYP111	Arabidopsis thaliana syntaxin-related protein KNOLLE (SYP111) mRNA, complete cds [NM_100729]
A_84_P607864	-2.12085	-1.08464	2.12085	down	GASA5	Arabidopsis thaliana GAST1 protein homolog 5 (GASA5) mRNA, complete cds [NM_111158]
A_84_P758327	-2.13955	-1.09731	2.13955	down	AT2G40711	Arabidopsis thaliana uncharacterized protein (AT2G40711) mRNA, complete cds [NM_001125015]
A_84_P14978	-2.64569	-1.40364	2.64569	down	DUR3	Arabidopsis thaliana solute:sodium symporter (DUR3) mRNA, complete cds [NM_123906]
A_84_P214028	-2.52673	-1.33727	2.52673	down	FLP	Arabidopsis thaliana FOUR LIPS transcription factor R2R3-MYB (FLP) mRNA, complete cds [NM_001084065]
A_84_P22137	-3.87055	-1.95254	3.87055	down	MPC	Arabidopsis thaliana poly-A binding protein-like protein (MPC) mRNA, complete cds [NM_112822]
A_84_P763570	-2.19734	-1.13576	2.19734	down
A_84_P201648	-2.24428	-1.16625	2.24428	down	NTL9	Arabidopsis thaliana NAC transcription factor-like 9 (NTL9) mRNA, complete cds [NM_001203998]
A_84_P11413	-2.06374	-1.04526	2.06374	down	AT1G30600	Arabidopsis thaliana subtilase-like protein (AT1G30600) mRNA, complete cds [NM_102797]
A_84_P753341	-2.2975	-1.20006	2.2975	down	AT1G29355	Arabidopsis thaliana mRNA, clone: RAFL17-02-C10 [AK117418]
A_84_P19590	-2.61221	-1.38527	2.61221	down	TPS5	Arabidopsis thaliana alpha,alpha-trehalose-phosphate synthase [UDP-forming] 5 (TPS5) mRNA, complete cds [NM_117886]
A_84_P856515	-2.42842	-1.28002	2.42842	down	PIP1;4	Arabidopsis thaliana putative aquaporin PIP1-4 (PIP1;4) mRNA, complete cds [NM_202760]
A_84_P19081	-2.1826	-1.12605	2.1826	down	AT1G25530	Arabidopsis thaliana lysine histidine transporter-like 6 (AT1G25530) mRNA, complete cds [NM_102364]
A_84_P19829	-3.12788	-1.64519	3.12788	down	AT5G58390	Arabidopsis thaliana peroxidase 67 (AT5G58390) mRNA, complete cds [NM_125225]
A_84_P18673	-2.33026	-1.22049	2.33026	down	MYB29	Arabidopsis thaliana myb domain protein 29 (MYB29) mRNA, complete cds [NM_120851]
A_84_P10499	-2.90291	-1.5375	2.90291	down	ADT6	Arabidopsis thaliana arogenate dehydratase 6 (ADT6) mRNA, complete cds [NM_100698]
A_84_P67134	-3.22221	-1.68805	3.22221	down	AT5G64550	Arabidopsis thaliana loricrin-related protein (AT5G64550) mRNA, complete cds [NM_125851]
A_84_P18901	-2.5357	-1.34238	2.5357	down	AT1G67035	Arabidopsis thaliana uncharacterized protein (AT1G67035) mRNA, complete cds [NM_001198406]
A_84_P15119	-2.10347	-1.07277	2.10347	down	AT1G15830	Arabidopsis thaliana uncharacterized protein (AT1G15830) mRNA, complete cds [NM_101451]
A_84_P240505	-2.40283	-1.26474	2.40283	down	AT2G27770	Arabidopsis thaliana uncharacterized protein (AT2G27770) mRNA, complete cds [NM_128336]
A_84_P89489	-3.03966	-1.60391	3.03966	down	AT3G16330	Arabidopsis thaliana uncharacterized protein (AT3G16330) mRNA, complete cds [NM_112504]
A_84_P17091	-3.69954	-1.88735	3.69954	down	TH7	Arabidopsis thaliana thioredoxin H7 (TH7) mRNA, complete cds [NM_104666]
A_84_P816246	-2.08465	-1.0598	2.08465	down	ATCAD4	Arabidopsis thaliana cinnamyl alcohol dehydrogenase 4 (ATCAD4) mRNA, complete cds [NM_112832]
A_84_P10811	-4.71982	-2.23873	4.71982	down	PBP1	Arabidopsis thaliana PYK10-binding protein 1 (PBP1) mRNA, complete cds [NM_001035633]
A_84_P848586	-2.0151	-1.01085	2.0151	down	AT1G04680	Arabidopsis thaliana putative pectate lyase 1 (AT1G04680) mRNA, complete cds [NM_100348]
A_84_P796323	-3.57321	-1.83722	3.57321	down	AT4G15820	Arabidopsis thaliana clone 39757 mRNA, complete sequence [AY087936]
A_84_P867036	-2.1318	-1.09207	2.1318	down	LAP3	Arabidopsis thaliana strictosidine synthase family protein (LAP3) mRNA, complete cds [NM_115815]
A_84_P182924	-3.91505	-1.96903	3.91505	down		GB
A_84_P582417	-3.77659	-1.91709	3.77659	down	AT5G26230	Arabidopsis thaliana uncharacterized protein (AT5G26230) mRNA, complete cds [NM_122524]
A_84_P14276	-2.55226	-1.35178	2.55226	down	AT1G22550	Arabidopsis thaliana putative peptide/nitrate transporter (AT1G22550) mRNA, complete cds [NM_102104]
A_84_P200164	-2.77843	-1.47427	2.77843	down	WPP3	Arabidopsis thaliana WPP domain-containing protein 3 (WPP3) mRNA, complete cds [NM_122676]
A_84_P551996	-2.15031	-1.10455	2.15031	down	AT4G09060	Arabidopsis thaliana uncharacterized protein (AT4G09060) mRNA, complete cds [NM_116975]
A_84_P16540	-4.23768	-2.08327	4.23768	down	RLP44	Arabidopsis thaliana receptor like protein 44 (RLP44) mRNA, complete cds [NM_114835]
A_84_P784871	-3.33507	-1.73772	3.33507	down	SYP111	Arabidopsis thaliana syntaxin-related protein KNOLLE (SYP111) mRNA, complete cds [NM_100729]
A_84_P756454	-2.43666	-1.2849	2.43666	down
A_84_P16776	-2.96813	-1.56956	2.96813	down	LEA4-5	Arabidopsis thaliana late embryogenesis abundant protein 4-5 (LEA4-5) mRNA, complete cds [NM_120759]
A_84_P844940	-2.20751	-1.14242	2.20751	down
A_84_P853804	-2.07327	-1.05191	2.07327	down		Rep: At5g08220 - Arabidopsis thaliana (Mouse-ear cress), partial (88%) [TC395533]
A_84_P282270	-2.84179	-1.5068	2.84179	down	AT5G43150	Arabidopsis thaliana uncharacterized protein (AT5G43150) mRNA, complete cds [NM_123681]
A_84_P20866	-2.88581	-1.52897	2.88581	down	AXR3	Arabidopsis thaliana auxin-responsive protein IAA17 (AXR3) mRNA, complete cds [NM_100306]
A_84_P813123	-3.63004	-1.85999	3.63004	down	BGAL3	Arabidopsis thaliana beta-galactosidase 3 (BGAL3) mRNA, complete cds [NM_119799]
A_84_P265830	-2.65892	-1.41084	2.65892	down	AT4G14020	Arabidopsis thaliana Rapid alkalinization factor (RALF) family protein (AT4G14020) mRNA, complete cds [NM_117477]
A_84_P13834	-2.90063	-1.53637	2.90063	down	AT4G23800	Arabidopsis thaliana HMG (high mobility group) box protein (AT4G23800) mRNA, complete cds [NM_118511]
A_84_P125591	-3.43284	-1.7794	3.43284	down	MSRB7	Arabidopsis thaliana peptide methionine sulfoxide reductase B7 (MSRB7) mRNA, complete cds [NM_118303]
A_84_P17929	-4.34302	-2.1187	4.34302	down	GolS2	Arabidopsis thaliana galactinol synthase 2 (GolS2) mRNA, complete cds [NM_104537]
A_84_P11200	-2.4327	-1.28256	2.4327	down	AT5G45920	Arabidopsis thaliana GDSL esterase/lipase (AT5G45920) mRNA, complete cds [NM_123960]
A_84_P15736	-3.4532	-1.78793	3.4532	down	AT1G21810	Arabidopsis thaliana uncharacterized protein (AT1G21810) mRNA, complete cds [NM_102029]
A_84_P13282	-2.4109	-1.26957	2.4109	down	AT1G75710	Arabidopsis thaliana C2H2-like zinc finger protein (AT1G75710) mRNA, complete cds [NM_106222]
A_84_P22769	-3.35772	-1.74748	3.35772	down	AT1G11700	Arabidopsis thaliana uncharacterized protein (AT1G11700) mRNA, complete cds [NM_101042]
A_84_P785659	-2.00006	-1.00004	2.00006	down	AT1G67860	Arabidopsis thaliana uncharacterized protein (AT1G67860) mRNA, complete cds [NM_105455]
A_84_P18073	-2.36751	-1.24337	2.36751	down	AT1G55690	Arabidopsis thaliana sec.4-like phosphatidylinositol transfer protein (AT1G55690) mRNA, complete cds [NM_179484]
A_84_P565286	-6.4141	-2.68125	6.4141	down	AT4G07740	Arabidopsis thaliana uncharacterized protein (AT4G07740) mRNA, complete cds [NM_116847]
A_84_P845406	-2.17007	-1.11774	2.17007	down	ASN1	Arabidopsis thaliana asparagine synthetase [glutamine-hydrolyzing] (ASN1) mRNA, complete cds [NM_114602]
A_84_P825563	-2.3209	-1.21469	2.3209	down	AT4G33140	Arabidopsis thaliana 5' nucleotidase, deoxy (Pyrimidine), cytosolic type C protein domain containing protein-like protein (AT4G33140) mRNA, complete cds [NM_119468]
A_84_P16901	-15.2538	-3.93109	15.2538	down	UF3GT	Arabidopsis thaliana UDP-glucose:flavonoid 3-o-glucosyltransferase (UF3GT) mRNA, complete cds [NM_124785]
A_84_P14635	-4.97169	-2.31374	4.97169	down	AT1G02460	Arabidopsis thaliana Pectin lyase-like protein (AT1G02460) mRNA, complete cds [NM_100127]
A_84_P835248	-2.9247	-1.54829	2.9247	down	AT1G27660	Arabidopsis thaliana transcription factor bHLH110 (AT1G27660) mRNA, complete cds [NM_102531]
A_84_P552933	-8.37403	-3.06592	8.37403	down	AT4G23020	Arabidopsis thaliana uncharacterized protein (AT4G23020) mRNA, complete cds [NM_118431]
A_84_P20424	-2.25448	-1.17279	2.25448	down	CYP706A5	Arabidopsis thaliana cytochrome P450, family 706, subfamily A, polypeptide 5 (CYP706A5) mRNA, complete cds [NM_117301]
A_84_P841983	-6.01664	-2.58896	6.01664	down		tc
A_84_P11358	-2.78041	-1.4753	2.78041	down	AT1G03820	Arabidopsis thaliana uncharacterized protein (AT1G03820) mRNA, complete cds [NM_100261]
A_84_P824259	-2.46292	-1.30037	2.46292	down	CDS2	Arabidopsis thaliana cytidinediphosphate diacylglycerol synthase 2 (CDS2) mRNA, complete cds [NM_001036620]
A_84_P787532	-2.17971	-1.12414	2.17971	down	AT5G06270	Arabidopsis thaliana uncharacterized protein (AT5G06270) mRNA, complete cds [NM_120710]
A_84_P762464	-6.15143	-2.62092	6.15143	down		Arabidopsis thaliana mRNA for hypothetical protein, complete cds, clone: RAFL14-04-D19 [AK227365]
A_84_P22309	-2.18736	-1.12919	2.18736	down	IQD16	Arabidopsis thaliana protein IQ-domain 16 (IQD16) mRNA, complete cds [NM_117132]
A_84_P839291	-2.11811	-1.08277	2.11811	down		GB
A_84_P819451	-2.24788	-1.16857	2.24788	down	CRN	Arabidopsis thaliana receptor-like kinase CORYNE (CRN) mRNA, complete cds [NM_001085108]
A_84_P792126	-2.97111	-1.571	2.97111	down	AT4G39190	Arabidopsis thaliana uncharacterized protein (AT4G39190) mRNA, complete cds [NM_120079]
A_84_P94009	-2.18278	-1.12616	2.18278	down	RRA1	Arabidopsis thaliana Nucleotide-diphospho-sugar transferase family protein (RRA1) mRNA, complete cds [NM_106168]
A_84_P834716	-2.36691	-1.24301	2.36691	down	AT3G19370	Arabidopsis thaliana uncharacterized protein (AT3G19370) mRNA, complete cds [NM_112824]
A_84_P10039	-2.15013	-1.10443	2.15013	down	AT1G27020	Arabidopsis thaliana uncharacterized protein (AT1G27020) mRNA, complete cds [NM_102464]
A_84_P766827	-2.10439	-1.0734	2.10439	down	NIC2	Arabidopsis thaliana mRNA for unknown protein, complete cds, clone: RAFL19-66-K06 [AK118412]
A_84_P19375	-3.76612	-1.91308	3.76612	down	PRXCA	Arabidopsis thaliana peroxidase 33 (PRXCA) mRNA, complete cds [NM_114770]
A_84_P829441	-5.03446	-2.33184	5.03446	down
ETG10_236652	-2.0513	-1.03654	2.0513	down		Unknown
A_84_P756046	-3.29213	-1.71902	3.29213	down	AT2G43440	Arabidopsis thaliana F-box protein (AT2G43440) mRNA, complete cds [NM_129905]
A_84_P757987	-2.17491	-1.12095	2.17491	down	AT2G04845	Arabidopsis thaliana Acyl-CoA N-acyltransferase domain-containing protein (AT2G04845) mRNA, complete cds [NM_001084411]
A_84_P518088	-2.74029	-1.45433	2.74029	down	AT2G33640	Arabidopsis thaliana putative S-acyltransferase (AT2G33640) mRNA, complete cds [NM_128924]
A_84_P10491	-2.18222	-1.1258	2.18222	down	GLIP5	Arabidopsis thaliana GDSL esterase/lipase 5 (GLIP5) mRNA, complete cds [NM_104270]
A_84_P769028	-2.26173	-1.17743	2.26173	down	AT5G44065	Arabidopsis thaliana uncharacterized protein (AT5G44065) mRNA, complete cds [NM_001125897]
A_84_P10821	-3.81171	-1.93044	3.81171	down		GB
A_84_P222669	-2.04927	-1.03511	2.04927	down	EXT4	Arabidopsis thaliana extensin 4 (EXT4) mRNA, complete cds [NM_106344]
A_84_P68124	-4.10961	-2.039	4.10961	down	AT5G42860	Arabidopsis thaliana uncharacterized protein (AT5G42860) mRNA, complete cds [NM_123651]
A_84_P824668	-4.3188	-2.11063	4.3188	down	MYB106	Arabidopsis thaliana myb domain protein 106 (MYB106) mRNA, complete cds [NM_110979]
A_84_P825992	-2.68705	-1.42602	2.68705	down	WAVE1	Arabidopsis thaliana protein SCAR1 (WAVE1) mRNA, complete cds [NM_179894]
A_84_P10323	-2.36336	-1.24084	2.36336	down	AAP4	Arabidopsis thaliana amino acid permease 4 (AAP4) mRNA, complete cds [NM_125780]
A_84_P847920	-2.68728	-1.42615	2.68728	down	AT5G43150	Arabidopsis thaliana uncharacterized protein (AT5G43150) mRNA, complete cds [NM_123681]
A_84_P11122	-10.4461	-3.3849	10.4461	down	TINY2	Arabidopsis thaliana dehydration-responsive element-binding protein 3 (TINY2) mRNA, complete cds [NM_121197]
A_84_P10554	-2.28306	-1.19097	2.28306	down	AT1G14580	Arabidopsis thaliana C2H2-like zinc finger protein (AT1G14580) mRNA, complete cds [NM_001198065]
A_84_P131086	-2.50876	-1.32698	2.50876	down	LSH3	Arabidopsis thaliana uncharacterized protein (LSH3) mRNA, complete cds [NM_128672]
A_84_P90799	-2.4034	-1.26507	2.4034	down	AT4G14600	Arabidopsis thaliana protein transport protein SFT1 (AT4G14600) mRNA, complete cds [NM_117540]
A_84_P768781	-2.08186	-1.05787	2.08186	down	AT5G44568	Arabidopsis thaliana uncharacterized protein (AT5G44568) mRNA, complete cds [NM_001085241]
A_84_P824798	-2.20012	-1.13758	2.20012	down
A_84_P591086	-2.52764	-1.33779	2.52764	down	AT3G52550	Arabidopsis thaliana uncharacterized protein (AT3G52550) mRNA, complete cds [NM_115115]
A_84_P767872	-2.53817	-1.34379	2.53817	down
A_84_P15620	-2.91139	-1.54171	2.91139	down	OBP3	Arabidopsis thaliana Dof zinc finger protein DOF3.6 (OBP3) mRNA, complete cds [NM_001203166]
A_84_P17493	-3.46784	-1.79404	3.46784	down	AT3G51280	Arabidopsis thaliana tetratricopeptide repeat domain-containing protein (AT3G51280) mRNA, complete cds [NM_114987]
A_84_P22571	-2.90408	-1.53808	2.90408	down	LTI78	Arabidopsis thaliana low-temperature-responsive protein 78/desiccation-responsive protein 29A (LTI78) mRNA, complete cds [NM_124610]
A_84_P21377	-3.75568	-1.90908	3.75568	down	ATL4H	Arabidopsis thaliana putative RING-H2 finger protein ATL53 (ATL4H) mRNA, complete cds [NM_001125531]
A_84_P762197	-2.04209	-1.03004	2.04209	down	AT3G03341	Arabidopsis thaliana uncharacterized protein (AT3G03341) mRNA, complete cds [NM_001125087]
A_84_P831889	-2.68646	-1.42571	2.68646	down	AT3G05220	Arabidopsis thaliana heavy-metal-associated domain-containing protein (AT3G05220) mRNA, complete cds [NM_202497]
A_84_P21851	-13.4043	-3.74462	13.4043	down	MYB113	Arabidopsis thaliana transcription factor MYB113 (MYB113) mRNA, complete cds [NM_105308]
A_84_P268780	-2.25589	-1.1737	2.25589	down	AT1G45010	Arabidopsis thaliana TRAM, LAG1 and CLN8 (TLC) lipid-sensing domain containing protein (AT1G45010) mRNA, complete cds [NM_103581]
A_84_P790868	-3.13184	-1.64701	3.13184	down	NAC105	Arabidopsis thaliana NAC domain containing protein 105 (NAC105) mRNA, complete cds [NM_126028]
A_84_P14474	-2.14935	-1.1039	2.14935	down	MRP11	Arabidopsis thaliana multidrug resistance-associated protein 11 (MRP11) mRNA, complete cds [NM_126770]
A_84_P598527	-2.49298	-1.31787	2.49298	down	AT5G49110	Arabidopsis thaliana fanconi anemia group I protein (AT5G49110) mRNA, complete cds [NM_001125928]
A_84_P216038	-2.62385	-1.39169	2.62385	down	ACD6	Arabidopsis thaliana ankyrin repeat-containing protein (ACD6) mRNA, complete cds [NM_117519]
A_84_P10581	-2.87385	-1.52299	2.87385	down	AT1G15410	Arabidopsis thaliana aspartate-glutamate racemase-like protein (AT1G15410) mRNA, complete cds [NM_101410]
A_84_P257080	-2.42552	-1.27829	2.42552	down	AT1G10380	Arabidopsis thaliana Putative membrane lipoprotein (AT1G10380) mRNA, complete cds [NM_100912]
A_84_P104316	-2.23347	-1.15929	2.23347	down	ABF3	Arabidopsis thaliana abscisic acid-insensitive 5-like protein 6 (ABF3) mRNA, complete cds [NM_001036708]
A_84_P768688	-4.71349	-2.23679	4.71349	down	AT5G17165	Arabidopsis thaliana uncharacterized protein (AT5G17165) mRNA, complete cds [NM_001085128]
A_84_P12310	-2.58592	-1.37068	2.58592	down	AT1G76960	Arabidopsis thaliana uncharacterized protein (AT1G76960) mRNA, complete cds [NM_106347]
A_84_P17526	-2.51535	-1.33076	2.51535	down	MTPA2	Arabidopsis thaliana metal tolerance protein A2 (MTPA2) mRNA, complete cds [NM_115743]
A_84_P20340	-2.84633	-1.5091	2.84633	down	AT3G53380	Arabidopsis thaliana concanavalin A-like lectin kinase-like protein (AT3G53380) mRNA, complete cds [NM_115198]
A_84_P754748	-3.37837	-1.75633	3.37837	down	AT1G42480	Arabidopsis thaliana uncharacterized protein (AT1G42480) mRNA, complete cds [NM_001123953]
A_84_P118802	-2.82178	-1.4966	2.82178	down	AT3G05920	Arabidopsis thaliana heavy-metal-associated domain-containing protein (AT3G05920) mRNA, complete cds [NM_111466]
A_84_P17709	-2.78083	-1.47552	2.78083	down	AT5G02510	Arabidopsis thaliana uncharacterized protein (AT5G02510) mRNA, complete cds [NM_120329]
A_84_P830028	-5.0738	-2.34307	5.0738	down
A_84_P23480	-2.09493	-1.0669	2.09493	down	AT5G42280	Arabidopsis thaliana cysteine/histidine-rich C1 domain-containing protein (AT5G42280) mRNA, complete cds [NM_123593]
A_84_P515273	-2.93779	-1.55473	2.93779	down	AT1G61255	Arabidopsis thaliana uncharacterized protein (AT1G61255) mRNA, complete cds [NM_148616]
A_84_P588433	-2.43844	-1.28596	2.43844	down	AT3G61750	Arabidopsis thaliana Cytochrome b561/ferric reductase transmembrane with DOMON related domain (AT3G61750) mRNA, complete cds [NM_116040]
A_84_P595126	-4.94366	-2.30558	4.94366	down	MES13	Arabidopsis thaliana methyl esterase 13 (MES13) mRNA, complete cds [NM_102400]
A_84_P11930	-3.28274	-1.7149	3.28274	down	BAM3	Arabidopsis thaliana leucine-rich receptor-like protein kinase BAM3 (BAM3) mRNA, complete cds [NM_118146]
A_84_P853230	-2.96396	-1.56752	2.96396	down	AT3G50780	Arabidopsis thaliana uncharacterized protein (AT3G50780) mRNA, complete cds [NM_114938]
A_84_P95069	-7.1543	-2.83881	7.1543	down	AT2G22170	Arabidopsis thaliana PLAT-plant-stress domain-containing protein (AT2G22170) mRNA, complete cds [NM_127785]
A_84_P506488	-2.03259	-1.02332	2.03259	down		Arabidopsis thaliana mRNA for hypothetical protein, clone: RAFL09-46-D22 [AK227018]
A_84_P518042	-4.77174	-2.25451	4.77174	down	LLG2	Arabidopsis thaliana LORELEI-like glucosylphosphatidylinositol-anchored protein 2 (LLG2) mRNA, complete cds [NM_127634]
A_84_P22428	-4.82544	-2.27066	4.82544	down	BGAL3	Arabidopsis thaliana beta-galactosidase 3 (BGAL3) mRNA, complete cds [NM_119799]
A_84_P14475	-4.66118	-2.22069	4.66118	down	AT1G30080	Arabidopsis thaliana glycosyl hydrolases family 17 domain-containing protein (AT1G30080) mRNA, complete cds [NM_102747]
A_84_P852628	-2.66262	-1.41285	2.66262	down	AT5G02600	Arabidopsis thaliana heavy metal transport/detoxification domain-containing protein (AT5G02600) mRNA, complete cds [NM_202994]
A_84_P22531	-2.25361	-1.17224	2.25361	down	AT5G41400	Arabidopsis thaliana RING/U-box domain-containing protein (AT5G41400) mRNA, complete cds [NM_123505]
A_84_P233099	-2.16479	-1.11423	2.16479	down	AT3G01630	Arabidopsis thaliana major facilitator protein (AT3G01630) mRNA, complete cds [NM_111029]
A_84_P821249	-2.07615	-1.05391	2.07615	down	AT5G07580	Arabidopsis thaliana ERF/AP2 transcription factor (AT5G07580) mRNA, complete cds [NM_120840]
A_84_P809649	-3.41952	-1.7738	3.41952	down		Rep: ER lumen protein retaining receptor - Vitis vinifera (Grape), partial (5%) [TC395123]
A_84_P751914	-2.17173	-1.11885	2.17173	down	AT1G38131	Arabidopsis thaliana O-fucosyltransferase-like protein (AT1G38131) mRNA, complete cds [NM_148521]
A_84_P810338	-10.146	-3.34283	10.146	down
A_84_P21325	-2.31662	-1.21202	2.31662	down	MRP10	Arabidopsis thaliana ABC transporter C family member 14 (MRP10) mRNA, complete cds [NM_116135]
A_84_P839208	-6.89245	-2.78502	6.89245	down	AT1G70260	Arabidopsis thaliana nodulin MtN21 /EamA-like transporter protein (AT1G70260) mRNA, complete cds [NM_105694]
A_84_P515482	-2.12252	-1.08578	2.12252	down	AT3G03130	Arabidopsis thaliana uncharacterized protein (AT3G03130) mRNA, complete cds [NM_111183]
A_84_P802855	-2.29255	-1.19695	2.29255	down
A_84_P16596	-2.03584	-1.02563	2.03584	down	AT3G62820	Arabidopsis thaliana plant invertase/pectin methylesterase inhibitor domain-containing protein (AT3G62820) mRNA, complete cds [NM_116147]
A_84_P13122	-2.11766	-1.08247	2.11766	down	SGP1	Arabidopsis thaliana Ras-related small GTP-binding family protein (SGP1) mRNA, complete cds [NM_124865]
A_84_P842431	-2.69091	-1.42809	2.69091	down		GB
A_84_P10551	-8.19356	-3.03449	8.19356	down	CYCB2;4	Arabidopsis thaliana cyclin-B2-4 (CYCB2;4) mRNA, complete cds [NM_106281]
A_84_P162133	-2.14447	-1.10062	2.14447	down	AT4G32290	Arabidopsis thaliana Core-2/I-branching beta-1,6-N-acetylglucosaminyltransferase family protein (AT4G32290) mRNA, complete cds [NM_119382]
A_84_P733216	-3.00233	-1.58608	3.00233	down		Rep: Uncharacterized protein At5g03190.2 - Arabidopsis thaliana (Mouse-ear cress), complete [TC370633]
A_84_P206528	-4.49851	-2.16945	4.49851	down	AT1G79110	Arabidopsis thaliana zinc ion binding protein (AT1G79110) mRNA, complete cds [NM_106562]
A_84_P20039	-2.15584	-1.10825	2.15584	down	RHM1	Arabidopsis thaliana UDP-glucose 4,6-dehydratase (RHM1) mRNA, complete cds [NM_106504]
A_84_P52140	-2.23146	-1.15799	2.23146	down	AT1G24580	Arabidopsis thaliana RING/U-box domain-containing protein (AT1G24580) mRNA, complete cds [NM_202179]
A_84_P758465	-3.27116	-1.7098	3.27116	down	AT3G42130	Arabidopsis thaliana glycine-rich protein (AT3G42130) mRNA, complete cds [NM_114080]
A_84_P18514	-3.00024	-1.58508	3.00024	down	AT1G06000	Arabidopsis thaliana UDP-glycosyltransferase-like protein (AT1G06000) mRNA, complete cds [NM_100480]
A_84_P816785	-2.21665	-1.14838	2.21665	down	PP2-A1	Arabidopsis thaliana protein PHLOEM protein 2-LIKE A1 (PP2-A1) mRNA, complete cds [NM_118104]
A_84_P181494	-2.03488	-1.02495	2.03488	down	CYP71A25	Arabidopsis thaliana cytochrome P450 71A25 (CYP71A25) mRNA, complete cds [NM_148854]
A_84_P839790	-2.54455	-1.34741	2.54455	down		Rep: F7H2.14 - Arabidopsis thaliana (Mouse-ear cress), partial (12%) [TC396409]
A_84_P12861	-2.88151	-1.52682	2.88151	down	ENODL19	Arabidopsis thaliana early nodulin-like protein 19 (ENODL19) mRNA, complete cds [NM_001203782]
A_84_P14437	-2.00572	-1.00412	2.00572	down	XERICO	Arabidopsis thaliana RING/U-box domain-containing protein (XERICO) mRNA, complete cds [NM_201687]
A_84_P11414	-4.00086	-2.00031	4.00086	down	AT1G05640	Arabidopsis thaliana ankyrin repeats-containing protein (AT1G05640) mRNA, complete cds [NM_100444]
A_84_P858298	-5.57728	-2.47956	5.57728	down	AT3G55020	Arabidopsis thaliana RabGAP/TBC domain-containing protein (AT3G55020) mRNA, complete cds [NM_115360]
A_84_P554998	-4.71596	-2.23755	4.71596	down	AT5G10340	Arabidopsis thaliana F-box protein (AT5G10340) mRNA, complete cds [NM_121072]
A_84_P282290	-2.62453	-1.39206	2.62453	down	AT5G61340	Arabidopsis thaliana uncharacterized protein (AT5G61340) mRNA, complete cds [NM_125527]
A_84_P517582	-2.84214	-1.50698	2.84214	down	AT5G10310	Arabidopsis thaliana epidermal patterning factor-like protein 1 (AT5G10310) mRNA, complete cds [NM_121069]
A_84_P763039	-2.14311	-1.09971	2.14311	down	SOBER1	Arabidopsis thaliana carboxylesterase (SOBER1) mRNA, complete cds [NM_118356]
A_84_P307240	-3.89296	-1.96087	3.89296	down	NUDT17	Arabidopsis thaliana nudix hydrolase 17 (NUDT17) mRNA, complete cds [NM_126228]
A_84_P19473	-2.80774	-1.48941	2.80774	down	RDR2	Arabidopsis thaliana RNA-dependent RNA polymerase 2 (RDR2) mRNA, complete cds [NM_117183]
A_84_P17734	-4.73113	-2.24218	4.73113	down	LBD4	Arabidopsis thaliana LOB domain-containing protein 4 (LBD4) mRNA, complete cds [NM_102870]
A_84_P18923	-2.02924	-1.02094	2.02924	down	SUVR1	Arabidopsis thaliana histone-lysine N-methyltransferase SUVR1 (SUVR1) mRNA, complete cds [NM_100286]
A_84_P290454	-4.69209	-2.23023	4.69209	down	AT5G44670	Arabidopsis thaliana uncharacterized protein (AT5G44670) mRNA, complete cds [NM_123834]
A_84_P754226	-2.23861	-1.1626	2.23861	down	AT1G25141	Arabidopsis thaliana UDP-3-O-[3-hydroxymyristoyl] N-acetylglucosamine deacetylase (AT1G25141) mRNA, complete cds [NM_102326]
A_84_P868891	-10.3923	-3.37745	10.3923	down	BGLU18	Arabidopsis thaliana beta glucosidase 18 (BGLU18) mRNA, complete cds [NM_104118]
A_84_P584912	-2.24701	-1.168	2.24701	down	AT4G06536	Arabidopsis thaliana SPla/RYanodine receptor (SPRY) domain-containing protein (AT4G06536) mRNA, complete cds [NM_178981]
A_84_P566516	-9.03823	-3.17604	9.03823	down	AT3G24850	Arabidopsis thaliana uncharacterized protein (AT3G24850) mRNA, complete cds [NM_113397]
A_84_P825792	-2.34796	-1.23141	2.34796	down	EXLB1	Arabidopsis thaliana expansin-like B1 (EXLB1) mRNA, complete cds [NM_117807]
A_84_P858347	-2.03356	-1.02401	2.03356	down	DGK2	Arabidopsis thaliana diacylglycerol kinase 2 (DGK2) mRNA, complete cds [NM_125772]
A_84_P11687	-2.28976	-1.1952	2.28976	down	AT3G01350	Arabidopsis thaliana putative peptide/nitrate transporter (AT3G01350) mRNA, complete cds [NM_111001]
A_84_P763707	-2.80455	-1.48777	2.80455	down
A_84_P503278	-2.28776	-1.19393	2.28776	down	AT4G17760	Arabidopsis thaliana cell cycle checkpoint protein (AT4G17760) mRNA, complete cds [NM_117885]
A_84_P21920	-2.92884	-1.55033	2.92884	down	AT1G13410	Arabidopsis thaliana pentatricopeptide repeat-containing protein (AT1G13410) mRNA, complete cds [NM_101211]
A_84_P807456	-3.84309	-1.94227	3.84309	down	AT1G54000	Arabidopsis thaliana GDSL esterase/lipase (AT1G54000) mRNA, complete cds [NM_104277]
A_84_P12863	-2.04022	-1.02873	2.04022	down	HAK5	Arabidopsis thaliana Potassium transporter 5 (HAK5) mRNA, complete cds [NM_117416]
A_84_P818318	-3.25707	-1.70357	3.25707	down	AT4G27560	Arabidopsis thaliana UDP-glycosyltransferase-like protein (AT4G27560) mRNA, complete cds [NM_118891]
A_84_P850014	-4.90239	-2.29349	4.90239	down
A_84_P819415	-3.9962	-1.99863	3.9962	down	AT3G17120	Arabidopsis thaliana uncharacterized protein (AT3G17120) mRNA, complete cds [NM_112588]
A_84_P551844	-3.46554	-1.79308	3.46554	down	AT3G11745	Arabidopsis thaliana uncharacterized protein (AT3G11745) mRNA, complete cds [NM_112007]
A_84_P66934	-2.15585	-1.10826	2.15585	down	AT5G26630	Arabidopsis thaliana MADS-box protein AGL35 (AT5G26630) mRNA, complete cds [NM_180551]
A_84_P107372	-4.52005	-2.17634	4.52005	down	AT3G02120	Arabidopsis thaliana hydroxyproline-rich glycoprotein-like protein (AT3G02120) mRNA, complete cds [NM_111078]
A_84_P810608	-6.60537	-2.72364	6.60537	down
A_84_P21252	-11.3126	-3.49986	11.3126	down	AT3G45680	Arabidopsis thaliana major facilitator protein (AT3G45680) mRNA, complete cds [NM_114437]
A_84_P18274	-2.50846	-1.3268	2.50846	down	PLP6	Arabidopsis thaliana PATATIN-like protein 6 (PLP6) mRNA, complete cds [NM_129480]
A_84_P21611	-2.39567	-1.26043	2.39567	down	AT5G48320	Arabidopsis thaliana cysteine/histidine-rich C1 domain-containing protein (AT5G48320) mRNA, complete cds [NM_124207]
A_84_P10781	-3.54812	-1.82706	3.54812	down	AT3G15650	Arabidopsis thaliana phospholipase/carboxylesterase family protein (AT3G15650) mRNA, complete cds [NM_001202974]
A_84_P13165	-5.0278	-2.32993	5.0278	down	AT5G65320	Arabidopsis thaliana transcription factor bHLH99 (AT5G65320) mRNA, complete cds [NM_125930]
A_84_P12115	-5.11372	-2.35437	5.11372	down	AT5G37790	Arabidopsis thaliana protein kinase family protein (AT5G37790) mRNA, complete cds [NM_123138]
A_84_P16082	-4.85305	-2.27889	4.85305	down	FMO GS-OX2	Arabidopsis thaliana flavin-containing monooxygenase FMO GS-OX2 (FMO GS-OX2) mRNA, complete cds [NM_104933]
A_84_P21246	-2.45312	-1.29462	2.45312	down	AT3G43960	Arabidopsis thaliana putative cysteine proteinase (AT3G43960) mRNA, complete cds [NM_114264]
A_84_P516273	-4.0907	-2.03235	4.0907	down	AT2G20590	Arabidopsis thaliana reticulon-like protein B17 (AT2G20590) mRNA, complete cds [NM_201759]
A_84_P797860	-3.23717	-1.69474	3.23717	down	AT5G15740	Arabidopsis thaliana O-fucosyltransferase family protein (AT5G15740) mRNA, complete cds [NM_121579]
A_84_P17245	-7.70348	-2.94551	7.70348	down	PIP2;8	Arabidopsis thaliana putative aquaporin PIP2-8 (PIP2;8) mRNA, complete cds [NM_127238]
A_84_P536887	-2.18228	-1.12583	2.18228	down	AT3G50350	Arabidopsis thaliana uncharacterized protein (AT3G50350) mRNA, complete cds [NM_114895]
A_84_P501463	-3.66112	-1.87228	3.66112	down	UGE5	Arabidopsis thaliana UDP-D-glucose/UDP-D-galactose 4-epimerase 5 (UGE5) mRNA, complete cds [NM_117166]
A_84_P13826	-4.69975	-2.23258	4.69975	down	BGLU47	Arabidopsis thaliana beta-glucosidase 47 (BGLU47) mRNA, complete cds [NM_118296]
A_84_P540816	-2.66632	-1.41485	2.66632	down	MAF1	Arabidopsis thaliana MADS transcription factor MAF1 (MAF1) mRNA, complete cds [NM_180649]
A_84_P65514	-2.05707	-1.04059	2.05707	down	HGL1	Arabidopsis thaliana heteroglycan glucosidase 1 (HGL1) mRNA, complete cds [NM_001125213]
A_84_P12198	-2.87495	-1.52354	2.87495	down	TMO6	Arabidopsis thaliana Dof zinc finger protein DOF5.3 (TMO6) mRNA, complete cds [NM_125413]
A_84_P754785	-3.3875	-1.76022	3.3875	down	CLE26	Arabidopsis thaliana CLAVATA3/ESR-related 26 protein (CLE26) mRNA, complete cds [NM_001124103]
A_84_P608861	-3.43072	-1.77851	3.43072	down	AT3G51230	Arabidopsis thaliana uncharacterized protein (AT3G51230) mRNA, complete cds [NM_114982]
A_84_P13556	-2.38605	-1.25462	2.38605	down	ARAC9	Arabidopsis thaliana Rac-like GTP-binding protein ARAC9 (ARAC9) mRNA, complete cds [NM_130033]
A_84_P12069	-11.6575	-3.54319	11.6575	down	AT5G12090	Arabidopsis thaliana protein kinase family protein (AT5G12090) mRNA, complete cds [NM_121247]
A_84_P23766	-3.95345	-1.98311	3.95345	down
A_84_P10347	-2.04192	-1.02993	2.04192	down	AT5G17600	Arabidopsis thaliana RING-H2 finger protein ATL52 (AT5G17600) mRNA, complete cds [NM_121766]
A_84_P293514	-2.66456	-1.41389	2.66456	down	IQD11	Arabidopsis thaliana protein IQ-domain 11 (IQD11) mRNA, complete cds [NM_121349]
A_84_P786357	-2.01002	-1.00721	2.01002	down	AT5G18860	Arabidopsis thaliana inosine-uridine preferring nucleoside hydrolase family protein (AT5G18860) mRNA, complete cds [NM_121891]
A_84_P759318	-2.11296	-1.07926	2.11296	down	AT3G42310	Arabidopsis thaliana uncharacterized protein (AT3G42310) mRNA, complete cds [NM_114098]
A_84_P12545	-4.24573	-2.08601	4.24573	down	SGR5	Arabidopsis thaliana C2H2-like zinc finger protein (SGR5) mRNA, complete cds [NM_001084399]
A_84_P792558	-5.08507	-2.34627	5.08507	down	AT1G23980	11061127 CERES-AN65 Arabidopsis thaliana cDNA clone 1340712 5', mRNA sequence [DR354216]
A_84_P553411	-6.29058	-2.65319	6.29058	down	AT1G71870	Arabidopsis thaliana protein novel ion carrier-2 (AT1G71870) mRNA, complete cds [NM_105845]
A_84_P547662	-4.73409	-2.24309	4.73409	down	AT4G29920	Arabidopsis thaliana heat shock protein-relatedlike protein (AT4G29920) mRNA, complete cds [NM_119138]
A_84_P14780	-4.66891	-2.22309	4.66891	down	ALL1	Arabidopsis thaliana aldolase like protein (ALL1) mRNA, complete cds [NM_118540]
A_84_P814539	-2.52072	-1.33383	2.52072	down
A_84_P599932	-8.11998	-3.02148	8.11998	down	AT3G18670	Arabidopsis thaliana ankyrin repeat-containing protein (AT3G18670) mRNA, complete cds [NM_112753]
A_84_P768273	-4.85624	-2.27984	4.85624	down	AT5G55131	Arabidopsis thaliana putative defensin-like protein 84 (AT5G55131) mRNA, complete cds [NM_001037000]
A_84_P803724	-3.23181	-1.69234	3.23181	down	AAP2	AV543237 Arabidopsis thaliana roots Columbia Arabidopsis thaliana cDNA clone RZ198b12F 3', mRNA sequence [AV543237]
A_84_P14715	-4.27662	-2.09647	4.27662	down	PIPK10	Arabidopsis thaliana 1-phosphatidylinositol-4-phosphate 5-kinase (PIPK10) mRNA, complete cds [NM_116349]
A_84_P17452	-2.63004	-1.39508	2.63004	down	AT3G14780	Arabidopsis thaliana uncharacterized protein (AT3G14780) mRNA, complete cds [NM_112339]
A_84_P197194	-8.75167	-3.12956	8.75167	down	AT4G22870	Arabidopsis thaliana leucoanthocyanidin dioxygenase (AT4G22870) mRNA, complete cds [NM_001160794]
A_84_P159275	-6.94633	-2.79625	6.94633	down	FLA1	Arabidopsis thaliana fasciclin-like arabinogalactan protein 1 (FLA1) mRNA, complete cds [NM_001203621]
A_84_P13900	-2.01548	-1.01112	2.01548	down	CYP96A12	Arabidopsis thaliana cytochrome P450, family 96, subfamily A, polypeptide 12 (CYP96A12) mRNA, complete cds [NM_120111]
A_84_P18380	-2.09297	-1.06555	2.09297	down	RSH2	Arabidopsis thaliana root hair specific 2 (RSH2) mRNA, complete cds [NM_101166]
A_84_P10151	-11.1135	-3.47424	11.1135	down	KCS19	Arabidopsis thaliana 3-ketoacyl-CoA synthase 21 (KCS19) mRNA, complete cds [NM_120535]
A_84_P19189	-2.27323	-1.18475	2.27323	down	AT2G42960	Arabidopsis thaliana putative receptor-like protein kinase (AT2G42960) mRNA, complete cds [NM_129858]
A_84_P22412	-2.26868	-1.18186	2.26868	down	WRKY13	Arabidopsis thaliana putative WRKY transcription factor 13 (WRKY13) mRNA, complete cds [NM_120101]
A_84_P561646	-3.91669	-1.96963	3.91669	down	AT3G28420	Arabidopsis thaliana Putative membrane lipoprotein (AT3G28420) mRNA, complete cds [NM_113762]
A_84_P18932	-2.0109	-1.00784	2.0109	down	AST91	Arabidopsis thaliana putative sulfate transporter 3.3 (AST91) mRNA, complete cds [NM_102157]
A_84_P816704	-3.07102	-1.61872	3.07102	down	CHY1	Arabidopsis thaliana AT5G65940 mRNA, complete cds, clone: RAFL21-87-B14 [AK318922]
A_84_P16816	-2.72792	-1.4478	2.72792	down	IMS2	Arabidopsis thaliana methylthioalkylmalate synthase 3 (IMS2) mRNA, complete cds [NM_122208]
A_84_P603728	-2.50534	-1.325	2.50534	down	AT5G02600	Arabidopsis thaliana heavy metal transport/detoxification domain-containing protein (AT5G02600) mRNA, complete cds [NM_202994]
A_84_P869611	-2.0144	-1.01035	2.0144	down	DWF4	Arabidopsis thaliana cytochrome P450 90B1 (DWF4) mRNA, complete cds [NM_114926]
A_84_P835299	-6.90285	-2.78719	6.90285	down		Rep: Chromosome chr8 scaffold_34, whole genome shotgun sequence - Vitis vinifera (Grape), partial (24%) [TC393622]
A_84_P16879	-2.36801	-1.24368	2.36801	down	AT5G47800	Arabidopsis thaliana Phototropic-responsive NPH3 family protein (AT5G47800) mRNA, complete cds [NM_124154]
A_84_P22147	-2.11255	-1.07898	2.11255	down	AT3G18490	Arabidopsis thaliana aspartyl protease family protein (AT3G18490) mRNA, complete cds [NM_112734]
A_84_P15425	-18.4163	-4.20291	18.4163	down	AT1G67750	Arabidopsis thaliana putative pectate lyase 5 (AT1G67750) mRNA, complete cds [NM_105443]
A_84_P562146	-2.31115	-1.20861	2.31115	down	AT1G19397	Arabidopsis thaliana uncharacterized protein (AT1G19397) mRNA, complete cds [NM_202138]
A_84_P14758	-5.49623	-2.45844	5.49623	down	AT4G18660	Arabidopsis thaliana uncharacterized protein (AT4G18660) mRNA, complete cds [NM_117982]
A_84_P22471	-5.25006	-2.39233	5.25006	down	HIK	Arabidopsis thaliana ATP binding microtubule motor family protein (HIK) mRNA, complete cds [NM_101695]
A_84_P10109	-3.19223	-1.67456	3.19223	down	GATA7	Arabidopsis thaliana GATA transcription factor 7 (GATA7) mRNA, complete cds [NM_119792]
A_84_P796904	-10.2454	-3.3569	10.2454	down	AT3G23320	Arabidopsis thaliana nucleic acid binding protein (AT3G23320) mRNA, complete cds [NM_113234]
A_84_P849797	-3.19995	-1.67805	3.19995	down		Arabidopsis thaliana mRNA for hypothetical protein, complete cds, clone: RAFL15-10-B06 [AK228488]
A_84_P12794	-2.51731	-1.33188	2.51731	down	AT3G57460	Arabidopsis thaliana catalytic/ metal ion binding / metalloendopeptidase/ zinc ion binding protein (AT3G57460) mRNA, complete cds [NM_115606]
A_84_P11540	-2.59652	-1.37658	2.59652	down	AT1G26100	Arabidopsis thaliana cytochrome B561 domain-containing protein (AT1G26100) mRNA, complete cds [NM_102375]
A_84_P849883	-2.70522	-1.43575	2.70522	down
A_84_P828333	-2.83008	-1.50084	2.83008	down	UGT71C2	Arabidopsis thaliana UDP-glucosyl transferase 71C2 (UGT71C2) mRNA, complete cds [NM_128528]
A_84_P763555	-6.22869	-2.63893	6.22869	down		Arabidopsis thaliana Full-length cDNA Complete sequence from clone GSLTFB2ZA07 of Flowers and buds of strain col-0 of Arabidopsis thaliana (thale cress) [BX826473]
A_84_P22985	-6.2851	-2.65194	6.2851	down	XTH32	Arabidopsis thaliana xyloglucan:xyloglucosyl transferase (XTH32) mRNA, complete cds [NM_129242]
A_84_P574263	-2.35888	-1.2381	2.35888	down	AT4G25433	Arabidopsis thaliana peptidoglycan-binding LysM domain-containing protein (AT4G25433) mRNA, complete cds [NM_148374]
A_84_P812128	-3.09293	-1.62897	3.09293	down	NSP1	Arabidopsis thaliana Nitrile-specifier protein 1 (NSP1) mRNA, complete cds [NM_112511]
A_84_P803135	-2.41632	-1.27281	2.41632	down
A_84_P816198	-4.58792	-2.19784	4.58792	down		Rep: Ethylene response sensor - Brassica oleracea (Wild cabbage), complete [TC378968]
A_84_P302670	-3.83481	-1.93916	3.83481	down	CLE22	Arabidopsis thaliana protein CLAVATA3/ESR-related 22 (CLE22) mRNA, complete cds [NM_147857]
A_84_P23572	-4.39168	-2.13477	4.39168	down	GMD1	Arabidopsis thaliana GDP-mannose 4,6 dehydratase 1 (GMD1) mRNA, complete cds [NM_126026]
A_84_P14672	-2.50992	-1.32764	2.50992	down	AT1G23850	Arabidopsis thaliana uncharacterized protein (AT1G23850) mRNA, complete cds [NM_102233]
A_84_P21983	-2.28094	-1.18963	2.28094	down	AT1G29980	Arabidopsis thaliana uncharacterized protein (AT1G29980) mRNA, complete cds [NM_202209]
A_84_P166063	-4.68587	-2.22832	4.68587	down	AT4G15620	Arabidopsis thaliana uncharacterized protein (AT4G15620) mRNA, complete cds [NM_117653]
A_84_P800349	-2.16412	-1.11378	2.16412	down		AYBDB69TR pooled cDNA populations Arabidopsis thaliana cDNA, mRNA sequence [EG508469]
A_84_P797722	-6.35265	-2.66736	6.35265	down		AYAVB95TF pooled cDNA populations Arabidopsis thaliana cDNA, mRNA sequence [EG464037]
A_84_P839412	-2.45942	-1.29832	2.45942	down		Rep: Chromosome chr13 scaffold_17, whole genome shotgun sequence - Vitis vinifera (Grape), partial (41%) [TC374605]
A_84_P21273	-2.25322	-1.17199	2.25322	down	OBP1	Arabidopsis thaliana Dof zinc finger protein DOF3.4 (OBP1) mRNA, complete cds [NM_114901]
A_84_P750319	-3.19507	-1.67585	3.19507	down
A_84_P750232	-4.489	-2.16639	4.489	down
A_84_P571442	-6.27371	-2.64932	6.27371	down	AT3G31400	Arabidopsis thaliana uncharacterized protein (AT3G31400) mRNA, complete cds [NM_114003]
A_84_P11279	-2.8835	-1.52782	2.8835	down		GB
A_84_P244595	-2.95829	-1.56476	2.95829	down	AT5G67620	Arabidopsis thaliana uncharacterized protein (AT5G67620) mRNA, complete cds [NM_126162]
A_84_P218238	-50.5928	-5.66086	50.5928	down	AT1G65450	Arabidopsis thaliana HXXXD-type acyl-transferase-like protein (AT1G65450) mRNA, complete cds [NM_105220]
A_84_P13533	-5.72455	-2.51716	5.72455	down	AT1G67790	Arabidopsis thaliana uncharacterized protein (AT1G67790) mRNA, complete cds [NM_105447]
A_84_P559167	-2.14563	-1.1014	2.14563	down	AT4G32000	Arabidopsis thaliana protein kinase family protein (AT4G32000) mRNA, complete cds [NM_119352]
A_84_P17278	-2.989	-1.57966	2.989	down	GSTU6	Arabidopsis thaliana glutathione S-transferase (GSTU6) mRNA, complete cds [NM_128498]
A_84_P827778	-2.00034	-1.00024	2.00034	down	FU	Arabidopsis thaliana Protein kinase family protein with ARM repeat domain (FU) mRNA, complete cds [NM_001084223]
A_84_P762161	-4.59766	-2.2009	4.59766	down	AT3G43291	Arabidopsis thaliana uncharacterized protein (AT3G43291) mRNA, complete cds [NM_001125286]
A_84_P813630	-2.00146	-1.00106	2.00146	down	TUB8	Arabidopsis thaliana tubulin beta-8 chain (TUB8) mRNA, complete cds [NM_001203444]
A_84_P14515	-49.9825	-5.64335	49.9825	down	GDH3	Arabidopsis thaliana glutamate dehydrogenase (NAD(P)+) (GDH3) mRNA, complete cds [NM_111262]
A_84_P12058	-8.55809	-3.09729	8.55809	down	FLS1	Arabidopsis thaliana flavonol synthase/flavanone 3-hydroxylase (FLS1) mRNA, complete cds [NM_001203337]
A_84_P848704	-3.27917	-1.71333	3.27917	down		Rep: Chromosome chr7 scaffold_31, whole genome shotgun sequence - Vitis vinifera (Grape), partial (7%) [TC390196]
A_84_P50530	-2.1571	-1.10909	2.1571	down	AT5G53710	Arabidopsis thaliana uncharacterized protein (AT5G53710) mRNA, complete cds [NM_124750]
A_84_P794273	-2.4654	-1.30182	2.4654	down		Rep: Bone morphogenetic protein 2 - Trachemys scripta (Red-eared slider turtle) (Pseudemys scripta), partial (6%) [TC395672]
A_84_P13089	-7.29383	-2.86668	7.29383	down
A_84_P821587	-3.51838	-1.81491	3.51838	down	LPAT5	Arabidopsis thaliana lysocardiolipin and lysophospholipid acyltransferase (LPAT5) mRNA, complete cds [NM_001084714]
A_84_P18462	-2.27014	-1.18278	2.27014	down	AT3G56270	Arabidopsis thaliana uncharacterized protein (AT3G56270) mRNA, complete cds [NM_115485]
A_84_P579374	-3.46399	-1.79243	3.46399	down	AT3G06035	Arabidopsis thaliana glycoprotein membrane precursor GPI-anchored protein (AT3G06035) mRNA, complete cds [NM_111478]
A_84_P10439	-5.32762	-2.41349	5.32762	down	BIP3	Arabidopsis thaliana Hsp70 protein BiP chaperone BIP-L (BIP3) mRNA, complete cds [NM_100779]
A_84_P20033	-2.26927	-1.18223	2.26927	down	PIN6	Arabidopsis thaliana putative auxin efflux carrier component 6 (PIN6) mRNA, complete cds [NM_106361]
A_84_P310283	-6.87924	-2.78225	6.87924	down	AT5G01320	Arabidopsis thaliana pyruvate decarboxylase (AT5G01320) mRNA, complete cds [NM_120210]
A_84_P790917	-2.78356	-1.47693	2.78356	down	AT4G00695	AYAWX13TF pooled cDNA populations Arabidopsis thaliana cDNA, mRNA sequence [EG460367]
A_84_P10525	-2.47722	-1.30872	2.47722	down	AT1G72125	Arabidopsis thaliana putative peptide/nitrate transporter (AT1G72125) mRNA, complete cds [NM_001124113]
A_84_P862627	-4.84961	-2.27787	4.84961	down
A_84_P844818	-2.25409	-1.17254	2.25409	down
A_84_P15700	-5.01878	-2.32734	5.01878	down	AT4G13710	Arabidopsis thaliana pectate lyase (AT4G13710) mRNA, complete cds [NM_117445]
A_84_P198594	-3.09553	-1.63019	3.09553	down	AT1G11850	Arabidopsis thaliana uncharacterized protein (AT1G11850) mRNA, complete cds [NM_001084052]
A_84_P54070	-2.48458	-1.313	2.48458	down
A_84_P763742	-3.61782	-1.85512	3.61782	down
A_84_P831942	-10.3459	-3.37098	10.3459	down	AT4G20320	Arabidopsis thaliana putative CTP synthase (AT4G20320) mRNA, complete cds [NM_001084942]
A_84_P867496	-2.18571	-1.12811	2.18571	down	CYP705A21	Arabidopsis thaliana cytochrome P450, family 705, subfamily A, polypeptide 21 (CYP705A21) mRNA, complete cds [NM_112903]
A_84_P838058	-2.4523	-1.29413	2.4523	down	AT1G34315	AYBKB64TR pooled cDNA populations Arabidopsis thaliana cDNA, mRNA sequence [EG518275]
A_84_P807490	-3.28974	-1.71797	3.28974	down	AT1G54010	Arabidopsis thaliana GDSL esterase/lipase (AT1G54010) mRNA, complete cds [NM_104278]
A_84_P841211	-2.98454	-1.57751	2.98454	down	CPuORF11	Arabidopsis thaliana S-adenosylmethionine decarboxylase-like protein (CPuORF11) mRNA, complete cds [NM_001125225]
A_84_P819513	-3.31555	-1.72925	3.31555	down	AT1G55590	Arabidopsis thaliana F-box protein At-B (AT1G55590) mRNA, complete cds [NM_104435]
A_84_P761356	-5.03088	-2.33081	5.03088	down	AT3G61898	Arabidopsis thaliana uncharacterized protein (AT3G61898) mRNA, complete cds [NM_001035838]
A_84_P826876	-4.4162	-2.14281	4.4162	down	FLA15	Arabidopsis thaliana fasciclin-like arabinogalactan protein 15 (FLA15) mRNA, complete cds [NM_115097]
A_84_P23692	-3.14306	-1.65217	3.14306	down	KCS2	Arabidopsis thaliana 3-ketoacyl-CoA synthase 17 (KCS2) mRNA, complete cds [NM_100303]
A_84_P257430	-2.02128	-1.01527	2.02128	down	AT5G66800	Arabidopsis thaliana uncharacterized protein (AT5G66800) mRNA, complete cds [NM_126078]
A_84_P275630	-2.69215	-1.42876	2.69215	down	AT5G04000	Arabidopsis thaliana uncharacterized protein (AT5G04000) mRNA, complete cds [NM_120482]
A_84_P758376	-6.70228	-2.74465	6.70228	down	AT2G13623	Arabidopsis thaliana uncharacterized protein (AT2G13623) mRNA, complete cds [NM_001124841]
A_84_P518116	-2.0493	-1.03513	2.0493	down	AT2G41610	Arabidopsis thaliana uncharacterized protein (AT2G41610) mRNA, complete cds [NM_129724]
A_84_P819429	-3.80485	-1.92784	3.80485	down	BPEp	Arabidopsis thaliana transcription factor BPE (BPEp) mRNA, complete cds [NM_104657]
A_84_P836158	-4.93133	-2.30198	4.93133	down	AT5G61100	Arabidopsis thaliana uncharacterized protein (AT5G61100) mRNA, complete cds [NM_125503]
A_84_P792024	-3.21271	-1.68379	3.21271	down	AT3G05180	Arabidopsis thaliana GDSL esterase/lipase (AT3G05180) mRNA, complete cds [NM_111391]
A_84_P23267	-3.25245	-1.70153	3.25245	down	AT4G13600	Arabidopsis thaliana carbohydrate-binding X8 domain-containing protein (AT4G13600) mRNA, complete cds [NM_117434]
A_84_P18494	-2.45397	-1.29512	2.45397	down	NAC007	Arabidopsis thaliana NAC domain-containing protein 7 (NAC007) mRNA, complete cds [NM_101098]
A_84_P826337	-3.9197	-1.97074	3.9197	down	AT2G12462	Arabidopsis thaliana uncharacterized protein (AT2G12462) mRNA, complete cds [NM_001036271]
A_84_P16486	-2.03654	-1.02612	2.03654	down	CYP705A21	Arabidopsis thaliana cytochrome P450, family 705, subfamily A, polypeptide 21 (CYP705A21) mRNA, complete cds [NM_112903]
A_84_P16784	-4.60797	-2.20413	4.60797	down	AT5G08490	Arabidopsis thaliana pentatricopeptide repeat-containing protein (AT5G08490) mRNA, complete cds [NM_120934]
A_84_P21980	-2.25511	-1.1732	2.25511	down	UBC29	Arabidopsis thaliana ubiquitin-conjugating enzyme E2 29 (UBC29) mRNA, complete cds [NM_127226]
A_84_P803276	-3.70253	-1.88851	3.70253	down		BP822426 RAFL19 Arabidopsis thaliana cDNA clone RAFL22-61-H09 5', mRNA sequence [BP822426]
A_84_P17224	-4.56812	-2.1916	4.56812	down	AT2G19810	Arabidopsis thaliana zinc finger CCCH domain-containing protein 20 (AT2G19810) mRNA, complete cds [NM_127539]
A_84_P18718	-5.50091	-2.45967	5.50091	down	GATA12	Arabidopsis thaliana GATA transcription factor 12 (GATA12) mRNA, complete cds [NM_122484]
A_84_P12302	-2.59996	-1.37849	2.59996	down	AT1G62510	Arabidopsis thaliana bifunctional inhibitor/lipid-transfer protein/seed storage 2S albumin-like protein (AT1G62510) mRNA, complete cds [NM_104930]
A_84_P22872	-2.87184	-1.52198	2.87184	down	AT1G78940	Arabidopsis thaliana adenine nucleotide alpha hydrolases-domain containing protein kinase (AT1G78940) mRNA, complete cds [NM_106543]
A_84_P187744	-2.23098	-1.15768	2.23098	down	CYP71A23	Arabidopsis thaliana cytochrome P450 71A23 (CYP71A23) mRNA, complete cds [NM_148856]
A_84_P15401	-2.01145	-1.00824	2.01145	down	NF-YA4	Arabidopsis thaliana nuclear transcription factor Y subunit A-4 (NF-YA4) mRNA, complete cds [NM_179904]
A_84_P598927	-5.15689	-2.3665	5.15689	down	AT2G33680	Arabidopsis thaliana pentatricopeptide repeat-containing protein (AT2G33680) mRNA, complete cds [NM_128926]
A_84_P825746	-2.22762	-1.15551	2.22762	down	HSA32	Arabidopsis thaliana Aldolase-type TIM barrel family protein (HSA32) mRNA, complete cds [NM_118250]
A_84_P17311	-3.07323	-1.61976	3.07323	down	AT2G04420	Arabidopsis thaliana RNase H domain-containing protein (AT2G04420) mRNA, complete cds [NM_126475]
A_84_P181894	-2.31684	-1.21216	2.31684	down	AT2G24990	Arabidopsis thaliana RIO kinase 1 (AT2G24990) mRNA, complete cds [NM_128057]
A_84_P830306	-8.55188	-3.09624	8.55188	down
A_84_P145899	-2.07557	-1.05351	2.07557	down	AT3G11720	Arabidopsis thaliana START domain-containing protein (AT3G11720) mRNA, complete cds [NM_001035596]
A_84_P828945	-2.06387	-1.04535	2.06387	down
A_84_P753779	-2.88347	-1.52781	2.88347	down	AT1G61795	Arabidopsis thaliana PAK-box/P21-Rho-binding family protein (AT1G61795) mRNA, complete cds [NM_001084287]
A_84_P511310	-4.77787	-2.25637	4.77787	down	AT4G32785	Arabidopsis thaliana uncharacterized protein (AT4G32785) mRNA, complete cds [NM_202938]
A_84_P11239	-4.88649	-2.2888	4.88649	down	AT5G56840	Arabidopsis thaliana myb-like transcription factor family protein (AT5G56840) mRNA, complete cds [NM_125067]
A_84_P830012	-2.87045	-1.52128	2.87045	down
A_84_P799589	-2.17497	-1.121	2.17497	down	AT2G43500	Arabidopsis thaliana RWP-RK domain-containing protein (AT2G43500) mRNA, complete cds [NM_001161101]
A_84_P139909	-2.42235	-1.27641	2.42235	down	AT5G49100	Arabidopsis thaliana uncharacterized protein (AT5G49100) mRNA, complete cds [NM_124287]
A_84_P824811	-2.07688	-1.05442	2.07688	down	AT2G32870	Arabidopsis thaliana TRAF-like family protein (AT2G32870) mRNA, complete cds [NM_128847]
A_84_P797932	-4.92567	-2.30032	4.92567	down		AYAPP73TR pooled cDNA populations Arabidopsis thaliana cDNA, mRNA sequence [EG476183]
A_84_P17942	-2.237	-1.16157	2.237	down	ZFP7	Arabidopsis thaliana zinc finger protein 7 (ZFP7) mRNA, complete cds [NM_102305]
A_84_P14593	-2.07165	-1.05078	2.07165	down	SAHH2	Arabidopsis thaliana adenosylhomocysteinase 2 (SAHH2) mRNA, complete cds [NM_113286]
A_84_P790360	-2.42284	-1.2767	2.42284	down		BX839012 Arabidopsis thaliana Adult vegetative tissue Col-0 Arabidopsis thaliana cDNA clone GSLTLS27ZE07 5PRIM, mRNA sequence [BX839012]
A_84_P11622	-5.03675	-2.33249	5.03675	down	LAX2	Arabidopsis thaliana auxin transporter-like protein 2 (LAX2) mRNA, complete cds [NM_127675]
A_84_P197134	-3.71718	-1.89421	3.71718	down	AT5G16250	Arabidopsis thaliana uncharacterized protein (AT5G16250) mRNA, complete cds [NM_121630]
A_84_P13191	-2.1415	-1.09862	2.1415	down	AT5G21100	Arabidopsis thaliana L-ascorbate oxidase (AT5G21100) mRNA, complete cds [NM_122118]
A_84_P837596	-13.5191	-3.75692	13.5191	down	FLS4	Arabidopsis thaliana flavonol synthase 4 (FLS4) mRNA, complete cds [NM_148158]
A_84_P13438	-2.03277	-1.02345	2.03277	down	C4H	Arabidopsis thaliana trans-cinnamate 4-monooxygenase (C4H) mRNA, complete cds [NM_128601]
A_84_P518112	-5.5484	-2.47207	5.5484	down	AT2G40480	Arabidopsis thaliana uncharacterized protein (AT2G40480) mRNA, complete cds [NM_129610]
A_84_P10344	-2.28471	-1.19201	2.28471	down	AT5G16240	Arabidopsis thaliana acyl-[acyl-carrier-protein] desaturase (AT5G16240) mRNA, complete cds [NM_121629]
A_84_P248875	-3.14636	-1.65368	3.14636	down	AIL5	Arabidopsis thaliana AP2-like ethylene-responsive transcription factor AIL5 (AIL5) mRNA, complete cds [NM_125122]
A_84_P739523	-2.24194	-1.16475	2.24194	down	AT2G31150	Arabidopsis thaliana ATP binding / ATPase (AT2G31150) mRNA, complete cds [NM_179829]
A_84_P592948	-13.3047	-3.73386	13.3047	down	AT4G11911	Arabidopsis thaliana uncharacterized protein (AT4G11911) mRNA, complete cds [NM_001125495]
A_84_P808037	-2.2926	-1.19699	2.2926	down	AT1G28400	Arabidopsis thaliana uncharacterized protein (AT1G28400) mRNA, complete cds [NM_102608]
A_84_P20190	-3.34226	-1.74082	3.34226	down	AT3G05180	Arabidopsis thaliana GDSL esterase/lipase (AT3G05180) mRNA, complete cds [NM_111391]
A_84_P14433	-4.45092	-2.15411	4.45092	down	GH9B8	Arabidopsis thaliana endoglucanase 11 (GH9B8) mRNA, complete cds [NM_128859]
A_84_P787318	-2.65145	-1.40678	2.65145	down	AT4G37295	Arabidopsis thaliana uncharacterized protein (AT4G37295) mRNA, complete cds [NM_119893]
A_84_P12309	-2.00965	-1.00694	2.00965	down	AT1G67360	Arabidopsis thaliana Rubber elongation factor protein (REF) (AT1G67360) mRNA, complete cds [NM_179525]
A_84_P19476	-81.2895	-6.345	81.2895	down	AT4G11730	Arabidopsis thaliana putative plasma membrane-type ATPase (AT4G11730) mRNA, complete cds [NM_117242]
A_84_P122882	-2.51254	-1.32915	2.51254	down	AT2G32430	Arabidopsis thaliana putative beta-1,3-galactosyltransferase 3 (AT2G32430) mRNA, complete cds [NM_128802]
A_84_P751365	-2.3048	-1.20464	2.3048	down	TLL1	Arabidopsis thaliana triacylglycerol lipase-like 1 protein (TLL1) mRNA, complete cds [NM_202246]
A_84_P801848	-30.3686	-4.92451	30.3686	down	AT1G67190	BX837864 Arabidopsis thaliana Hormone Treated Callus Col-0 Arabidopsis thaliana cDNA clone GSLTPGH73ZE07 5PRIM, mRNA sequence [BX837864]
A_84_P825500	-2.35461	-1.23549	2.35461	down	VLN1	Arabidopsis thaliana villin-1 (VLN1) mRNA, complete cds [NM_001036367]
A_84_P796873	-2.3122	-1.20927	2.3122	down	AT1G22230	Arabidopsis thaliana uncharacterized protein (AT1G22230) mRNA, complete cds [NM_102073]
A_84_P860810	-3.50725	-1.81034	3.50725	down	LTP6	Arabidopsis thaliana non-specific lipid-transfer protein 6 (LTP6) mRNA, complete cds [NM_111711]
A_84_P757702	-2.71471	-1.4408	2.71471	down	LCR51	Arabidopsis thaliana defensin-like protein 108 (LCR51) mRNA, complete cds [NM_001084565]
A_84_P12542	-7.0176	-2.81098	7.0176	down	HDG3	Arabidopsis thaliana homeobox-leucine zipper protein HDG3 (HDG3) mRNA, complete cds [NM_128796]
A_84_P833445	-4.50341	-2.17102	4.50341	down	AT1G26790	Arabidopsis thaliana Dof-type zinc finger domain-containing protein (AT1G26790) mRNA, complete cds [NM_102442]
A_84_P18265	-2.28677	-1.19331	2.28677	down	AT2G18480	Arabidopsis thaliana putative polyol transporter 3 (AT2G18480) mRNA, complete cds [NM_127404]
A_84_P14023	-2.63413	-1.39733	2.63413	down	AT5G42720	Arabidopsis thaliana Glycosyl hydrolase family 17 protein (AT5G42720) mRNA, complete cds [NM_123636]
A_84_P814616	-3.0145	-1.59192	3.0145	down	CYP81F4	Arabidopsis thaliana cytochrome P450, family 81, subfamily F, polypeptide 4 (CYP81F4) mRNA, complete cds [NM_119904]
A_84_P243525	-2.42886	-1.28028	2.42886	down	AT5G65040	Arabidopsis thaliana uncharacterized protein (AT5G65040) mRNA, complete cds [NM_125903]
A_84_P22048	-5.39896	-2.43268	5.39896	down	HB21	Arabidopsis thaliana homeobox-leucine zipper protein ATHB-21 (HB21) mRNA, complete cds [NM_127411]
A_84_P759271	-6.5651	-2.71482	6.5651	down
A_84_P281230	-2.13929	-1.09713	2.13929	down	BNQ2	Arabidopsis thaliana protein banquo 2 (BNQ2) mRNA, complete cds [NM_121520]
A_84_P857924	-2.04697	-1.03349	2.04697	down	AT3G27470	Arabidopsis thaliana uncharacterized protein (AT3G27470) mRNA, complete cds [NM_001084748]
A_84_P563499	-5.35746	-2.42155	5.35746	down	AT4G01730	Arabidopsis thaliana DHHC-type zinc finger protein (AT4G01730) mRNA, complete cds [NM_116403]
A_84_P129536	-2.80849	-1.48979	2.80849	down	AT3G50910	Arabidopsis thaliana uncharacterized protein (AT3G50910) mRNA, complete cds [NM_114951]
A_84_P178184	-2.65319	-1.40773	2.65319	down	LNG1	Arabidopsis thaliana protein longifolia1 (LNG1) mRNA, complete cds [NM_121562]
A_84_P239215	-33.9335	-5.08464	33.9335	down	PDF1.3	Arabidopsis thaliana defensin-like protein 14 (PDF1.3) mRNA, complete cds [NM_128160]
A_84_P811165	-6.26573	-2.64748	6.26573	down	GH9C2	Arabidopsis thaliana endoglucanase 6 (GH9C2) mRNA, complete cds [NM_105114]
A_84_P753793	-3.12872	-1.64557	3.12872	down	MLP28	Arabidopsis thaliana MLP-like protein 28 (MLP28) mRNA, complete cds [NM_001084337]
A_84_P822993	-2.58362	-1.36939	2.58362	down	CYP77A6	Arabidopsis thaliana cytochrome P450, family 77, subfamily A, polypeptide 6 (CYP77A6) mRNA, complete cds [NM_111893]
A_84_P75574	-2.1344	-1.09383	2.1344	down	CLE20	Arabidopsis thaliana CLAVATA3/ESR-related protein 20 (CLE20) mRNA, complete cds [NM_148435]
A_84_P604601	-4.51019	-2.17319	4.51019	down	MEE69	Arabidopsis thaliana maternal effect embryo arrest 69 / hydrolase (MEE69) mRNA, complete cds [NM_119877]
A_84_P287270	-2.53871	-1.3441	2.53871	down	P58IPK	Arabidopsis thaliana mamallian P58IPK-like protein (P58IPK) mRNA, complete cds [NM_120394]
A_84_P737772	-2.44465	-1.28963	2.44465	down		Arabidopsis thaliana Full-length cDNA Complete sequence from clone GSLTFB66ZE10 of Flowers and buds of strain col-0 of Arabidopsis thaliana (thale cress) [BX830217]
A_84_P22327	-2.19209	-1.13231	2.19209	down	AG	Arabidopsis thaliana MADS-box transcription factor (AG) mRNA, complete cds [NM_001203837]
A_84_P155515	-2.03209	-1.02297	2.03209	down	ABIL3	Arabidopsis thaliana protein ABIL3 (ABIL3) mRNA, complete cds [NM_122337]
A_84_P266910	-2.16224	-1.11252	2.16224	down	AT1G47655	Arabidopsis thaliana Dof zinc finger protein DOF1.6 (AT1G47655) mRNA, complete cds [NM_103658]
A_84_P221098	-2.05149	-1.03667	2.05149	down	AT5G02590	Arabidopsis thaliana tetratricopeptide repeat domain-containing protein (AT5G02590) mRNA, complete cds [NM_120337]
A_84_P545529	-2.66861	-1.41609	2.66861	down	AT2G20830	Arabidopsis thaliana folic acid binding / transferase (AT2G20830) mRNA, complete cds [NM_127651]
A_84_P810343	-4.25353	-2.08866	4.25353	down	PBP1	Arabidopsis thaliana PYK10-binding protein 1 (PBP1) mRNA, complete cds [NM_001035633]
A_84_P14568	-3.05761	-1.61241	3.05761	down	MPK19	Arabidopsis thaliana mitogen-activated protein kinase 19 (MPK19) mRNA, complete cds [NM_112333]
A_84_P542440	-2.3702	-1.24501	2.3702	down	AT5G23750	Arabidopsis thaliana Remorin family protein (AT5G23750) mRNA, complete cds [NM_122280]
A_84_P812936	-8.68711	-3.11888	8.68711	down
A_84_P19952	-4.14642	-2.05187	4.14642	down	MAP70-4	Arabidopsis thaliana microtubule-associated proteins 70-4 (MAP70-4) mRNA, complete cds [NM_101353]
A_84_P16177	-2.50657	-1.32571	2.50657	down	ATGA2OX1	Arabidopsis thaliana gibberellin 2-beta-dioxygenase 1 (ATGA2OX1) mRNA, complete cds [NM_106491]
A_84_P222439	-5.53489	-2.46856	5.53489	down	FLA15	Arabidopsis thaliana fasciclin-like arabinogalactan protein 15 (FLA15) mRNA, complete cds [NM_115097]
A_84_P541789	-6.98674	-2.80462	6.98674	down	AT1G26250	Arabidopsis thaliana Proline-rich extensin-like family protein (AT1G26250) mRNA, complete cds [NM_102389]
A_84_P135955	-3.11337	-1.63848	3.11337	down	AT4G29980	Arabidopsis thaliana uncharacterized protein (AT4G29980) mRNA, complete cds [NM_119144]
A_84_P14472	-3.07012	-1.6183	3.07012	down	PAL1	Arabidopsis thaliana phenylalanine ammonia-lyase 1 (PAL1) mRNA, complete cds [NM_129260]
A_84_P140529	-2.65545	-1.40896	2.65545	down	SPA3	Arabidopsis thaliana ubiquitin-protein ligase RFWD2 (SPA3) mRNA, complete cds [NM_148725]
A_84_P20864	-3.96836	-1.98854	3.96836	down	AK-HSDH I	Arabidopsis thaliana bifunctional aspartokinase/homoserine dehydrogenase 1 (AK-HSDH I) mRNA, complete cds [NM_102861]
A_84_P836542	-2.9123	-1.54216	2.9123	down	CYP71B34	Arabidopsis thaliana cytochrome P450 71B34 (CYP71B34) mRNA, complete cds [NM_113537]
A_84_P22740	-7.96842	-2.99429	7.96842	down	AT1G77200	Arabidopsis thaliana ethylene-responsive transcription factor ERF037 (AT1G77200) mRNA, complete cds [NM_106369]
A_84_P756276	-2.51672	-1.33154	2.51672	down	CCR2	Arabidopsis thaliana glycine-rich RNA-binding protein 7 (CCR2) mRNA, complete cds [NM_179686]
A_84_P784713	-6.90798	-2.78826	6.90798	down	MYB43	Arabidopsis thaliana myb domain protein 43 (MYB43) mRNA, complete cds [NM_121666]
A_84_P549947	-2.08255	-1.05835	2.08255	down	AT2G18210	Arabidopsis thaliana uncharacterized protein (AT2G18210) mRNA, complete cds [NM_127378]
A_84_P223559	-2.75217	-1.46057	2.75217	down	LURP1	Arabidopsis thaliana LURP1 protein (LURP1) mRNA, complete cds [NM_127019]
A_84_P805537	-23.3549	-4.54565	23.3549	down	CYT1	Arabidopsis thaliana mannose-1-phosphate guanylyltransferase (CYT1) mRNA, complete cds [NM_001202784]
A_84_P813827	-2.82985	-1.50073	2.82985	down	AT4G24820	Arabidopsis thaliana 26S proteasome regulatory subunit N7 (AT4G24820) mRNA, complete cds [NM_202882]
A_84_P540376	-3.78443	-1.92008	3.78443	down	LSH4	Arabidopsis thaliana uncharacterized protein (LSH4) mRNA, complete cds [NM_001084733]
A_84_P22220	-3.36946	-1.75252	3.36946	down	AT3G50690	Arabidopsis thaliana acidic leucine-rich nuclear phosphoprotein 32-related protein (AT3G50690) mRNA, complete cds [NM_114929]
A_84_P751828	-15.3039	-3.93583	15.3039	down	AT1G43600	Arabidopsis thaliana NLI interacting factor (NIF) family protein (AT1G43600) mRNA, complete cds [NM_103485]
A_84_P829537	-2.6849	-1.42487	2.6849	down	AT4G13100	Arabidopsis thaliana RING/U-box domain-containing protein (AT4G13100) mRNA, complete cds [NM_117379]
A_84_P808508	-2.2077	-1.14254	2.2077	down	RPL18AA	Arabidopsis thaliana 60S ribosomal protein L18a-1 (RPL18AA) mRNA, complete cds [NM_001084157]
A_84_P23329	-4.21232	-2.07461	4.21232	down	ENODL15	Arabidopsis thaliana early nodulin-like protein 15 (ENODL15) mRNA, complete cds [NM_119334]
A_84_P298204	-2.83545	-1.50358	2.83545	down	TBL36	Arabidopsis thaliana protein trichome birefringence-like 36 (TBL36) mRNA, complete cds [NM_115286]
A_84_P79045	-2.32907	-1.21975	2.32907	down	AT1G06980	Arabidopsis thaliana uncharacterized protein (AT1G06980) mRNA, complete cds [NM_100571]
A_84_P18613	-2.32408	-1.21666	2.32408	down	AT1G27120	Arabidopsis thaliana putative beta-1,3-galactosyltransferase 17 (AT1G27120) mRNA, complete cds [NM_102474]
A_84_P844786	-2.34551	-1.2299	2.34551	down	AT2G16890	Arabidopsis thaliana UDP-glycosyltransferase-like protein (AT2G16890) mRNA, complete cds [NM_127242]
A_84_P793423	-3.72877	-1.8987	3.72877	down	FRS2	BP787099 RAFL7 Arabidopsis thaliana cDNA clone RAFL26-03-A03 3', mRNA sequence [BP787099]
A_84_P607788	-11.9186	-3.57514	11.9186	down	LBD11	Arabidopsis thaliana LOB domain-containing protein 11 (LBD11) mRNA, complete cds [NM_128410]
A_84_P22799	-2.56255	-1.35758	2.56255	down	AT1G55760	Arabidopsis thaliana BTB/POZ domain-containing protein (AT1G55760) mRNA, complete cds [NM_104452]
A_84_P839478	-4.51356	-2.17427	4.51356	down
A_84_P19041	-2.26201	-1.17761	2.26201	down	AT1G53025	Arabidopsis thaliana Ubiquitin-conjugating enzyme family protein (AT1G53025) mRNA, complete cds [NM_001198278]
A_84_P524320	-3.83281	-1.9384	3.83281	down	AT2G40475	Arabidopsis thaliana uncharacterized protein (AT2G40475) mRNA, complete cds [NM_129609]
A_84_P545496	-2.7626	-1.46602	2.7626	down	AT2G03570	Arabidopsis thaliana uncharacterized protein (AT2G03570) mRNA, complete cds [NM_126407]
A_84_P23000	-3.66216	-1.87269	3.66216	down	CRK1	Arabidopsis thaliana CDPK-related kinase 1 (CRK1) mRNA, complete cds [NM_129679]
A_84_P12305	-7.93851	-2.98887	7.93851	down	AT1G52050	Arabidopsis thaliana jacalin-like lectin domain-containing protein (AT1G52050) mRNA, complete cds [NM_104086]
A_84_P750021	-10.2849	-3.36246	10.2849	down		Rep: Contig An13c0010, complete genome - Aspergillus niger, partial (7%) [TC379192]
A_84_P18447	-2.45401	-1.29514	2.45401	down	AT3G53190	Arabidopsis thaliana putative pectate lyase 12 (AT3G53190) mRNA, complete cds [NM_115179]
A_84_P21141	-2.74206	-1.45526	2.74206	down	AT3G10200	Arabidopsis thaliana putative methyltransferase PMT6 (AT3G10200) mRNA, complete cds [NM_111855]
A_84_P845669	-2.42433	-1.27759	2.42433	down
A_84_P797966	-6.72224	-2.74894	6.72224	down	AT3G28918	Arabidopsis thaliana clone asmbl_9778 unknown mRNA sequence [EF183432]
A_84_P827173	-2.06333	-1.04497	2.06333	down	AT1G79630	Arabidopsis thaliana putative protein phosphatase 2C 18 (AT1G79630) mRNA, complete cds [NM_202451]
A_84_P23792	-4.86026	-2.28103	4.86026	down	KCS7	Arabidopsis thaliana 3-ketoacyl-CoA synthase 7 (KCS7) mRNA, complete cds [NM_105785]
A_84_P200434	-2.81483	-1.49305	2.81483	down	AT4G20170	Arabidopsis thaliana uncharacterized protein (AT4G20170) mRNA, complete cds [NM_118136]
A_84_P831967	-7.38491	-2.88458	7.38491	down	MRP10	Arabidopsis thaliana ABC transporter C family member 14 (MRP10) mRNA, complete cds [NM_116135]
A_84_P180884	-6.05577	-2.59831	6.05577	down	AT5G43755	Arabidopsis thaliana uncharacterized protein (AT5G43755) mRNA, complete cds [NM_148082]
A_84_P721650	-5.36193	-2.42275	5.36193	down	AT1G23201	Arabidopsis thaliana uncharacterized protein (AT1G23201) mRNA, complete cds [NM_001160887]
A_84_P842213	-2.67613	-1.42015	2.67613	down		GB
A_84_P609600	-2.14473	-1.1008	2.14473	down	AT2G40200	Arabidopsis thaliana transcription factor bHLH51 (AT2G40200) mRNA, complete cds [NM_129578]
A_84_P12431	-6.48759	-2.69768	6.48759	down	FUT3	Arabidopsis thaliana fucosyltransferase 3 (FUT3) mRNA, complete cds [NM_202413]
A_84_P244235	-2.29054	-1.19569	2.29054	down	AT3G20810	Arabidopsis thaliana transcription factor jumonji (jmjC) domain-containing protein (AT3G20810) mRNA, complete cds [NM_001035656]
A_84_P12512	-2.17157	-1.11874	2.17157	down	VLN1	Arabidopsis thaliana villin-1 (VLN1) mRNA, complete cds [NM_001202706]
A_84_P562069	-3.00049	-1.5852	3.00049	down	AT1G05370	Arabidopsis thaliana Sec.4-like phosphatidylinositol transfer family protein (AT1G05370) mRNA, complete cds [NM_100416]
A_84_P787617	-4.67868	-2.2261	4.67868	down	AT5G03270	Arabidopsis thaliana putative cytokinin riboside 5'-monophosphate phosphoribohydrolase LOG6 (AT5G03270) mRNA, complete cds [NM_120405]
A_84_P764012	-6.89123	-2.78476	6.89123	down
A_84_P22024	-2.59801	-1.37741	2.59801	down	OBP2	Arabidopsis thaliana Dof zinc finger protein DOF1.1 (OBP2) mRNA, complete cds [NM_001035911]
A_84_P21681	-2.50929	-1.32728	2.50929	down	AT5G66460	Arabidopsis thaliana mannan endo-1,4-beta-mannosidase 7 (AT5G66460) mRNA, complete cds [NM_126044]
A_84_P555846	-2.45924	-1.29821	2.45924	down	AT5G65030	Arabidopsis thaliana uncharacterized protein (AT5G65030) mRNA, complete cds [NM_125902]
A_84_P18526	-4.41069	-2.141	4.41069	down	AT4G10780	Arabidopsis thaliana putative disease resistance protein (AT4G10780) mRNA, complete cds [NM_117146]
A_84_P14080	-2.33296	-1.22216	2.33296	down	PLC5	Arabidopsis thaliana phosphoinositide phospholipase C 5 (PLC5) mRNA, complete cds [NM_125256]
A_84_P838695	-2.22958	-1.15677	2.22958	down	AT1G10380	Arabidopsis thaliana Putative membrane lipoprotein (AT1G10380) mRNA, complete cds [NM_100912]
A_84_P797738	-8.04011	-3.00721	8.04011	down		Arabidopsis thaliana clone asmbl_5479 unknown mRNA sequence [EF183322]
A_84_P137179	-4.02764	-2.00993	4.02764	down	AT5G62550	Arabidopsis thaliana uncharacterized protein (AT5G62550) mRNA, complete cds [NM_125649]
A_84_P12086	-4.73956	-2.24475	4.73956	down	AT5G19100	Arabidopsis thaliana Eukaryotic aspartyl protease family protein (AT5G19100) mRNA, complete cds [NM_121915]
A_84_P233209	-3.38139	-1.75762	3.38139	down	AT5G05060	Arabidopsis thaliana cystatin/monellin-related protein (AT5G05060) mRNA, complete cds [NM_120588]
A_84_P196694	-41.3092	-5.36839	41.3092	down	PDF1.2c	Arabidopsis thaliana defensin-like protein 17 (PDF1.2c) mRNA, complete cds [NM_123810]
A_84_P792813	-2.24274	-1.16527	2.24274	down		Arabidopsis thaliana clone pENTR221-At4g03156 small GTPase-like (At4g03156) mRNA, complete cds [DQ446795]
A_84_P96276	-2.00073	-1.00052	2.00073	down	PRR3	Arabidopsis thaliana two-component response regulator-like APRR3 (PRR3) mRNA, complete cds [NM_125403]
A_84_P708402	-2.06467	-1.04591	2.06467	down		24329 CD4-13 Arabidopsis thaliana cDNA clone E1A7T7, mRNA sequence [AA041063]
A_84_P186764	-2.98583	-1.57813	2.98583	down	AT3G21100	Arabidopsis thaliana RNA recognition motif-containing protein (AT3G21100) mRNA, complete cds [NM_113004]
A_84_P829697	-7.77973	-2.95972	7.77973	down	CDKB1;2	Arabidopsis thaliana cyclin-dependent kinase B1-2 (CDKB1;2) mRNA, complete cds [NM_129419]
A_84_P597910	-4.00187	-2.00068	4.00187	down	SOFL2	Arabidopsis thaliana SOB five-like 2 protein (SOFL2) mRNA, complete cds [NM_105560]
A_84_P585313	-3.41063	-1.77004	3.41063	down	AT1G16705	Arabidopsis thaliana p300/CBP acetyltransferase-related protein (AT1G16705) mRNA, complete cds [NM_101531]
A_84_P555902	-2.26337	-1.17847	2.26337	down	AT1G05540	Arabidopsis thaliana uncharacterized protein (AT1G05540) mRNA, complete cds [NM_100433]
A_84_P808727	-2.8543	-1.51314	2.8543	down	AT1G15760	Arabidopsis thaliana Sterile alpha motif (SAM) domain-containing protein (AT1G15760) mRNA, complete cds [NM_101444]
A_84_P18795	-3.79995	-1.92598	3.79995	down	ATK3	Arabidopsis thaliana kinesin 3 (ATK3) mRNA, complete cds [NM_124848]
A_84_P870733	-2.39374	-1.25927	2.39374	down	AT2G44670	Arabidopsis thaliana uncharacterized protein (AT2G44670) mRNA, complete cds [NM_130031]
A_84_P568000	-14.7882	-3.88637	14.7882	down	AT4G20940	Arabidopsis thaliana leucine-rich receptor-like protein kinase (AT4G20940) mRNA, complete cds [NM_118212]
A_84_P797437	-2.06028	-1.04284	2.06028	down	AT1G24270	AYARG52TR pooled cDNA populations Arabidopsis thaliana cDNA, mRNA sequence [EG453230]
A_84_P23427	-3.32227	-1.73217	3.32227	down	MYB43	Arabidopsis thaliana myb domain protein 43 (MYB43) mRNA, complete cds [NM_121666]
A_84_P570764	-4.24834	-2.0869	4.24834	down	AT5G03870	Arabidopsis thaliana Glutaredoxin family protein (AT5G03870) mRNA, complete cds [NM_120468]
A_84_P17393	-2.77978	-1.47497	2.77978	down	ATA20	Arabidopsis thaliana anther 20 (ATA20) mRNA, complete cds [NM_112408]
A_84_P835740	-15.5791	-3.96154	15.5791	down
A_84_P20957	-7.18509	-2.84501	7.18509	down	GH9C2	Arabidopsis thaliana endoglucanase 6 (GH9C2) mRNA, complete cds [NM_105114]
A_84_P514207	-2.80783	-1.48945	2.80783	down	AT2G16450	Arabidopsis thaliana putative F-box protein (AT2G16450) mRNA, complete cds [NM_127198]
A_84_P829045	-3.36748	-1.75167	3.36748	down	FMO GS-OX2	Arabidopsis thaliana flavin-containing monooxygenase FMO GS-OX2 (FMO GS-OX2) mRNA, complete cds [NM_104933]
A_84_P810593	-8.37154	-3.06549	8.37154	down	MLP423	Arabidopsis thaliana MLP-like protein 423 (MLP423) mRNA, complete cds [NM_102249]
A_84_P558452	-4.50777	-2.17242	4.50777	down	AT5G51850	Arabidopsis thaliana uncharacterized protein (AT5G51850) mRNA, complete cds [NM_124564]
A_84_P602209	-2.38001	-1.25097	2.38001	down	AT1G12330	Arabidopsis thaliana uncharacterized protein (AT1G12330) mRNA, complete cds [NM_101105]
A_84_P21158	-2.20317	-1.13958	2.20317	down	AT3G04550	Arabidopsis thaliana uncharacterized protein (AT3G04550) mRNA, complete cds [NM_111326]
A_84_P22400	-2.68758	-1.42631	2.68758	down	SEN1	Arabidopsis thaliana senescence-associated protein DIN1 (SEN1) mRNA, complete cds [NM_119743]
A_84_P513598	-2.20279	-1.13933	2.20279	down	AT2G22122	Arabidopsis thaliana uncharacterized protein (AT2G22122) mRNA, complete cds [NM_201779]
A_84_P12290	-2.03423	-1.02448	2.03423	down	GATL3	Arabidopsis thaliana putative galacturonosyltransferase-like 3 (GATL3) mRNA, complete cds [NM_101196]
A_84_P12549	-4.13918	-2.04935	4.13918	down	ATMPK13	Arabidopsis thaliana mitogen-activated protein kinase 13 (ATMPK13) mRNA, complete cds [NM_001035913]
A_84_P575148	-2.28024	-1.18918	2.28024	down	AT4G26680	Arabidopsis thaliana pentatricopeptide repeat-containing protein (AT4G26680) mRNA, complete cds [NM_001203920]
A_84_P810366	-3.10814	-1.63605	3.10814	down	HSP91	Arabidopsis thaliana heat shock protein 91 (HSP91) mRNA, complete cds [NM_106642]
A_84_P759531	-3.10437	-1.6343	3.10437	down	AT3G61410	Arabidopsis thaliana uncharacterized protein (AT3G61410) mRNA, complete cds [NM_116005]
A_84_P15194	-36.2274	-5.17901	36.2274	down	AT1G54020	Arabidopsis thaliana GDSL esterase/lipase (AT1G54020) mRNA, complete cds [NM_179474]
A_84_P136365	-2.57512	-1.36464	2.57512	down	AT5G39450	Arabidopsis thaliana F-box protein (AT5G39450) mRNA, complete cds [NM_123307]
A_84_P830589	-4.62894	-2.21068	4.62894	down	RIP2	Arabidopsis thaliana ROP interactive partner 2 (RIP2) mRNA, complete cds [NM_106490]
A_84_P20196	-3.12332	-1.64308	3.12332	down	AT1G36950	Arabidopsis thaliana RING/U-box domain-containing protein (AT1G36950) mRNA, complete cds [NM_103351]
A_84_P596235	-2.22813	-1.15583	2.22813	down	AT2G29910	Arabidopsis thaliana F-box/LRR-repeat protein (AT2G29910) mRNA, complete cds [NM_179807]
A_84_P21728	-5.69301	-2.50919	5.69301	down	AT1G20490	Arabidopsis thaliana 4-coumarate--CoA ligase-like 3 (AT1G20490) mRNA, complete cds [NM_101899]
A_84_P841540	-3.49545	-1.80548	3.49545	down	AT3G20830	Arabidopsis thaliana AGC (cAMP-dependent, cGMP-dependent and protein kinase C) kinase family protein (AT3G20830) mRNA, complete cds [NM_112974]
A_84_P839463	-2.84527	-1.50857	2.84527	down	AT5G37478	Arabidopsis thaliana TPX2 (targeting protein for Xklp2) family protein (AT5G37478) mRNA, complete cds [NM_203128]
A_84_P16900	-5.56544	-2.4765	5.56544	down	AT5G53820	Arabidopsis thaliana Late embryogenesis abundant protein (LEA) family protein (AT5G53820) mRNA, complete cds [NM_124761]
A_84_P20786	-2.13047	-1.09117	2.13047	down	AGL12	Arabidopsis thaliana agamous-like MADS-box protein AGL12 (AGL12) mRNA, complete cds [NM_105825]
A_84_P762579	-12.4109	-3.63354	12.4109	down		Rep: Chromosome undetermined scaffold_518, whole genome shotgun sequence - Vitis vinifera (Grape), partial (56%) [TC388818]
A_84_P20288	-2.51476	-1.33042	2.51476	down	AT3G13620	Arabidopsis thaliana Amino acid permease family protein (AT3G13620) mRNA, complete cds [NM_112208]
A_84_P834735	-2.01478	-1.01062	2.01478	down		119711. [TC389806]
A_84_P66984	-4.80509	-2.26456	4.80509	down	AT1G64360	Arabidopsis thaliana uncharacterized protein (AT1G64360) mRNA, complete cds [NM_105111]
A_84_P577950	-7.30519	-2.86892	7.30519	down	AT5G26640	Arabidopsis thaliana uncharacterized protein (AT5G26640) mRNA, complete cds [NM_180550]
A_84_P23651	-3.72978	-1.89909	3.72978	down	MGP	Arabidopsis thaliana zinc finger protein MAGPIE (MGP) mRNA, complete cds [NM_001035874]
A_84_P840360	-11.512	-3.52507	11.512	down		GB
A_84_P23143	-3.15206	-1.6563	3.15206	down		GB
A_84_P20310	-3.8385	-1.94054	3.8385	down	AT3G46480	Arabidopsis thaliana iron ion binding / oxidoreductase/ oxidoreductase protein (AT3G46480) mRNA, complete cds [NM_114515]
A_84_P540496	-5.78408	-2.53209	5.78408	down	AT4G09170	Arabidopsis thaliana uncharacterized protein (AT4G09170) mRNA, complete cds [NM_116986]
A_84_P583430	-2.31642	-1.2119	2.31642	down	AT5G66310	Arabidopsis thaliana ATP binding microtubule motor family protein (AT5G66310) mRNA, complete cds [NM_126029]
A_84_P826815	-2.54371	-1.34693	2.54371	down	SHN2	Arabidopsis thaliana ethylene-responsive transcription factor SHINE 3 (SHN2) mRNA, complete cds [NM_180742]
A_84_P811911	-2.98337	-1.57694	2.98337	down	RAB18	Arabidopsis thaliana dehydrin Rab18 (RAB18) mRNA, complete cds [NM_126038]
A_84_P791422	-3.44762	-1.7856	3.44762	down	GATA20	Arabidopsis thaliana HANL1 mRNA, complete sequence [DQ875128]
A_84_P21510	-8.33997	-3.06004	8.33997	down	GRP17	Arabidopsis thaliana glycine rich protein 17 (GRP17) mRNA, complete cds [NM_120835]
A_84_P264940	-2.10836	-1.07612	2.10836	down	AT4G05040	Arabidopsis thaliana ankyrin repeat-containing protein (AT4G05040) mRNA, complete cds [NM_116743]
A_84_P19773	-2.44527	-1.28999	2.44527	down	NAC101	Arabidopsis thaliana NAC-domain protein 101 (NAC101) mRNA, complete cds [NM_125632]
A_84_P817391	-2.17302	-1.1197	2.17302	down	AT2G17710	Arabidopsis thaliana uncharacterized protein (AT2G17710) mRNA, complete cds [NM_127325]
A_84_P858042	-2.07259	-1.05144	2.07259	down	AT3G50920	Arabidopsis thaliana Phosphatidic acid phosphatase (PAP2) family protein (AT3G50920) mRNA, complete cds [NM_114952]
A_84_P22856	-2.32297	-1.21597	2.32297	down	RBL6	Arabidopsis thaliana RHOMBOID-like protein 6 (RBL6) mRNA, complete cds [NM_001198046]
A_84_P838108	-2.71575	-1.44135	2.71575	down	AT3G21295	Arabidopsis thaliana uncharacterized protein (AT3G21295) mRNA, complete cds [NM_001084726]
A_84_P605570	-4.56165	-2.18956	4.56165	down	AT5G21280	Arabidopsis thaliana hydroxyproline-rich glycoprotein family protein (AT5G21280) mRNA, complete cds [NM_147881]
A_84_P754856	-4.57583	-2.19403	4.57583	down
A_84_P755591	-6.59415	-2.72119	6.59415	down		GB
A_84_P870134	-2.06989	-1.04955	2.06989	down	BGLU6	Arabidopsis thaliana beta glucosidase 6 (BGLU6) mRNA, complete cds [NM_104717]
A_84_P11360	-11.8098	-3.56191	11.8098	down	MBP1	Arabidopsis thaliana myrosinase-binding protein 1 (MBP1) mRNA, complete cds [NM_104085]
A_84_P21461	-2.01022	-1.00735	2.01022	down	AT4G38300	Arabidopsis thaliana glycosyl hydrolase family 10 protein (AT4G38300) mRNA, complete cds [NM_119992]
A_84_P532737	-3.00629	-1.58799	3.00629	down	AT5G41460	Arabidopsis thaliana uncharacterized protein (AT5G41460) mRNA, complete cds [NM_123510]
A_84_P611898	-2.20249	-1.13913	2.20249	down	UGT76E1	Arabidopsis thaliana UDP-glucosyl transferase 76E1 (UGT76E1) mRNA, complete cds [NM_125350]
A_84_P23915	-3.83734	-1.94011	3.83734	down	GRP2B	Arabidopsis thaliana glycine-rich protein 2B (GRP2B) mRNA, complete cds [NM_127676]
A_84_P20301	-4.60375	-2.20281	4.60375	down	CSLD5	Arabidopsis thaliana 1,4-beta-D-xylan synthase (CSLD5) mRNA, complete cds [NM_100153]
A_84_P20700	-2.48806	-1.31502	2.48806	down	ATL63	Arabidopsis thaliana RING-H2 finger protein ATL63 (ATL63) mRNA, complete cds [NM_125245]
A_84_P23097	-2.0126	-1.00906	2.0126	down	SDG35	Arabidopsis thaliana SET domain protein 35 (SDG35) mRNA, complete cds [NM_102439]
A_84_P79809	-2.79299	-1.48181	2.79299	down	iqd33	Arabidopsis thaliana protein IQ-domain 33 (iqd33) mRNA, complete cds [NM_122958]
A_84_P16825	-3.81213	-1.9306	3.81213	down	AT5G25490	Arabidopsis thaliana Ran BP2/NZF zinc finger-like protein (AT5G25490) mRNA, complete cds [NM_122460]
A_84_P18956	-2.22942	-1.15667	2.22942	down	AT1G77280	Arabidopsis thaliana adenine nucleotide alpha hydrolases-domain containing protein kinase (AT1G77280) mRNA, complete cds [NM_106377]
A_84_P22610	-3.3074	-1.7257	3.3074	down	AT5G62210	Arabidopsis thaliana Embryo-specific protein 3, (ATS3) (AT5G62210) mRNA, complete cds [NM_125615]
A_84_P14579	-2.00466	-1.00336	2.00466	down	RLP37	Arabidopsis thaliana receptor like protein 37 (RLP37) mRNA, complete cds [NM_113212]
A_84_P561511	-3.02898	-1.59883	3.02898	down	AT2G36540	Arabidopsis thaliana haloacid dehalogenase-like hydrolase domain-containing protein (AT2G36540) mRNA, complete cds [NM_129210]
A_84_P833585	-3.35253	-1.74525	3.35253	down	AT5G55690	Arabidopsis thaliana MADS-box protein AGL47 (AT5G55690) mRNA, complete cds [NM_124951]
A_84_P556002	-6.42581	-2.68388	6.42581	down	AT1G45191	Arabidopsis thaliana beta-glucosidase 1 (AT1G45191) mRNA, complete cds [NM_179440]
A_84_P18855	-22.7841	-4.50995	22.7841	down	UGT78D3	Arabidopsis thaliana UDP-glucosyl transferase 78D3 (UGT78D3) mRNA, complete cds [NM_121709]
A_84_P823166	-3.5338	-1.82122	3.5338	down	LAX2	Arabidopsis thaliana auxin transporter-like protein 2 (LAX2) mRNA, complete cds [NM_127675]
A_84_P196604	-2.39659	-1.26099	2.39659	down	AT2G40530	Arabidopsis thaliana uncharacterized protein (AT2G40530) mRNA, complete cds [NM_129615]
A_84_P12228	-4.45878	-2.15665	4.45878	down	RLK	Arabidopsis thaliana receptor-like kinase (RLK) mRNA, complete cds [NM_126128]
A_84_P14226	-2.95639	-1.56384	2.95639	down	BCAT-2	Arabidopsis thaliana branched-chain-amino-acid aminotransferase 2 (BCAT-2) mRNA, complete cds [NM_001035939]
A_84_P837948	-2.70064	-1.4333	2.70064	down	PUP2	Arabidopsis thaliana purine permease 2 (PUP2) mRNA, complete cds [NM_128934]
A_84_P759235	-2.16742	-1.11598	2.16742	down
A_84_P17723	-11.5685	-3.53213	11.5685	down	AT5G07030	Arabidopsis thaliana aspartyl protease family protein (AT5G07030) mRNA, complete cds [NM_120785]
A_84_P15784	-2.77506	-1.47252	2.77506	down	CAD6	Arabidopsis thaliana cinnamyl-alcohol dehydrogenase (CAD6) mRNA, complete cds [NM_119958]
A_84_P785070	-2.39396	-1.2594	2.39396	down	DML1	Arabidopsis thaliana protein ROS1 (DML1) mRNA, complete cds [NM_129207]
A_84_P14981	-4.35593	-2.12298	4.35593	down	KAT1	Arabidopsis thaliana Potassium channel KAT1 (KAT1) mRNA, complete cds [NM_123993]
A_84_P14305	-2.27062	-1.18309	2.27062	down	AT1G66780	Arabidopsis thaliana MATE efflux family protein (AT1G66780) mRNA, complete cds [NM_105349]
A_84_P519725	-2.17794	-1.12296	2.17794	down	AT1G70470	Arabidopsis thaliana uncharacterized protein (AT1G70470) mRNA, complete cds [NM_105715]
A_84_P507571	-4.54734	-2.18502	4.54734	down	AT3G25130	Arabidopsis thaliana uncharacterized protein (AT3G25130) mRNA, complete cds [NM_113417]
A_84_P17770	-8.88888	-3.152	8.88888	down	AT5G25310	Arabidopsis thaliana putative glycosyltransferase (AT5G25310) mRNA, complete cds [NM_122440]
A_84_P585407	-2.60153	-1.37936	2.60153	down	RXW8	Arabidopsis thaliana lipase/hydrolase (RXW8) mRNA, complete cds [NM_001160964]
A_84_P12178	-2.27563	-1.18626	2.27563	down	AT1G56120	Arabidopsis thaliana Leucine-rich repeat transmembrane protein kinase (AT1G56120) mRNA, complete cds [NM_104490]
A_84_P13782	-11.431	-3.51488	11.431	down
A_84_P755266	-6.42887	-2.68457	6.42887	down	AT2G41450	Arabidopsis thaliana N-acetyltransferase (AT2G41450) mRNA, complete cds [NM_129708]
A_84_P765231	-3.29689	-1.72111	3.29689	down	AT4G20320	Arabidopsis thaliana putative CTP synthase (AT4G20320) mRNA, complete cds [NM_001084942]
A_84_P22775	-5.81843	-2.54063	5.81843	down	AT1G14190	Arabidopsis thaliana glucose-methanol-choline oxidoreductase-like protein (AT1G14190) mRNA, complete cds [NM_101285]
A_84_P19588	-2.53323	-1.34098	2.53323	down	EXLB1	Arabidopsis thaliana expansin-like B1 (EXLB1) mRNA, complete cds [NM_117807]
A_84_P817093	-2.22358	-1.15288	2.22358	down	ZW9	Arabidopsis thaliana TRAF-like protein (ZW9) mRNA, complete cds [NM_104607]
A_84_P826080	-10.1217	-3.33939	10.1217	down		GB
A_84_P223359	-4.89168	-2.29033	4.89168	down	AT1G54000	Arabidopsis thaliana GDSL esterase/lipase (AT1G54000) mRNA, complete cds [NM_104277]
A_84_P23713	-18.2863	-4.19269	18.2863	down	AT1G65810	Arabidopsis thaliana DNA helicase domain-containing protein (AT1G65810) mRNA, complete cds [NM_105254]
A_84_P867371	-5.66637	-2.50242	5.66637	down	ENODL13	Arabidopsis thaliana early nodulin-like protein 3 (ENODL13) mRNA, complete cds [NM_122418]
A_84_P19990	-2.20941	-1.14366	2.20941	down	AT1G68810	Arabidopsis thaliana transcription factor bHLH30 (AT1G68810) mRNA, complete cds [NM_105555]
A_84_P20747	-3.8916	-1.96036	3.8916	down	UGT78D2	Arabidopsis thaliana Flavonoid 3-O-glucosyltransferase (UGT78D2) mRNA, complete cds [NM_121711]
A_84_P829873	-4.95927	-2.31013	4.95927	down	AT4G09990	Arabidopsis thaliana uncharacterized protein (AT4G09990) mRNA, complete cds [NM_117067]
A_84_P838871	-2.8034	-1.48718	2.8034	down	AT1G52155	Arabidopsis thaliana uncharacterized protein (AT1G52155) mRNA, complete cds [NM_148579]
A_84_P15808	-10.7321	-3.42386	10.7321	down	AT1G19460	Arabidopsis thaliana Kelch repeat-containing protein (AT1G19460) mRNA, complete cds [NM_101802]
A_84_P13118	-2.05394	-1.0384	2.05394	down	MLO11	Arabidopsis thaliana MLO-like protein 11 (MLO11) mRNA, complete cds [NM_124755]
A_84_P73664	-2.83728	-1.50451	2.83728	down	AT1G77855	Arabidopsis thaliana uncharacterized protein (AT1G77855) mRNA, complete cds [NM_148664]
A_84_P10736	-7.21289	-2.85058	7.21289	down	ENODL16	Arabidopsis thaliana early nodulin-like protein 16 (ENODL16) mRNA, complete cds [NM_110972]
A_84_P754893	-9.35614	-3.22591	9.35614	down
A_84_P20677	-4.04087	-2.01467	4.04087	down	SBT1.3	Arabidopsis thaliana subtilase 1.3 (SBT1.3) mRNA, complete cds [NM_124554]
A_84_P834557	-2.51703	-1.33172	2.51703	down	AT2G03140	Arabidopsis thaliana alpha/beta-hydrolases-like protein (AT2G03140) mRNA, complete cds [NM_001202574]
A_84_P561689	-3.10173	-1.63307	3.10173	down	AT3G52110	Arabidopsis thaliana uncharacterized protein (AT3G52110) mRNA, complete cds [NM_115070]
A_84_P184234	-2.55979	-1.35603	2.55979	down	AT3G23090	Arabidopsis thaliana targeting protein for Xklp2-like protein (AT3G23090) mRNA, complete cds [NM_113210]
A_84_P291004	-4.55852	-2.18856	4.55852	down		GB
A_84_P12867	-2.58807	-1.37188	2.58807	down	KAT2	Arabidopsis thaliana Potassium channel KAT2 (KAT2) mRNA, complete cds [NM_117939]
A_84_P14399	-2.37359	-1.24707	2.37359	down	AT2G46210	Arabidopsis thaliana Fatty acid/sphingolipid desaturase (AT2G46210) mRNA, complete cds [NM_130183]
A_84_P11009	-2.3439	-1.22891	2.3439	down	VATG3	Arabidopsis thaliana V-type proton ATPase subunit G3 (VATG3) mRNA, complete cds [NM_118728]
A_84_P19408	-4.5947	-2.19997	4.5947	down		GB
A_84_P11030	-2.34224	-1.22789	2.34224	down	AT4G30450	Arabidopsis thaliana glycine-rich protein (AT4G30450) mRNA, complete cds [NM_119191]
A_84_P834747	-2.2912	-1.1961	2.2912	down	PIN6	Arabidopsis thaliana putative auxin efflux carrier component 6 (PIN6) mRNA, complete cds [NM_106361]
A_84_P859652	-7.62337	-2.93043	7.62337	down		Rep: pollen Ole e 1 allergen and extensin family protein - Arabidopsis thaliana, partial (28%) [TC399623]
A_84_P17045	-5.2738	-2.39884	5.2738	down	THA1	Arabidopsis thaliana threonine aldolase (THA1) mRNA, complete cds [NM_100736]
A_84_P760217	-4.97345	-2.31425	4.97345	down
A_84_P17673	-2.31623	-1.21178	2.31623	down	CYP81F3	Arabidopsis thaliana cytochrome P450, family 81, subfamily F, polypeptide 3 (CYP81F3) mRNA, complete cds [NM_119903]
A_84_P23413	-4.44263	-2.15141	4.44263	down	TET16	Arabidopsis thaliana tetraspanin 16 (TET16) mRNA, complete cds [NM_101709]
A_84_P18116	-3.29558	-1.72053	3.29558	down	AT1G80580	Arabidopsis thaliana ethylene-responsive transcription factor ERF084 (AT1G80580) mRNA, complete cds [NM_106706]
A_84_P11995	-2.79968	-1.48526	2.79968	down	AT4G35160	Arabidopsis thaliana O-methyltransferase family 2 protein (AT4G35160) mRNA, complete cds [NM_119682]
A_84_P94929	-4.2384	-2.08352	4.2384	down
A_84_P22453	-4.20209	-2.07111	4.20209	down	AT1G06540	Arabidopsis thaliana uncharacterized protein (AT1G06540) mRNA, complete cds [NM_100533]
A_84_P255680	-3.18627	-1.67187	3.18627	down	AT5G05960	Arabidopsis thaliana bifunctional inhibitor/lipid-transfer protein/seed storage 2S albumin-like protein (AT5G05960) mRNA, complete cds [NM_120678]
A_84_P19180	-2.25365	-1.17226	2.25365	down	AT2G28510	Arabidopsis thaliana Dof zinc finger protein DOF2.1 (AT2G28510) mRNA, complete cds [NM_128411]
A_84_P17063	-2.0441	-1.03147	2.0441	down	PUP4	Arabidopsis thaliana purine permease 4 (PUP4) mRNA, complete cds [NM_001198190]
A_84_P558306	-2.24393	-1.16603	2.24393	down	AT5G01910	Arabidopsis thaliana uncharacterized protein (AT5G01910) mRNA, complete cds [NM_001125681]
A_84_P856427	-5.51079	-2.46226	5.51079	down	ACT4	Arabidopsis thaliana actin 4 (ACT4) mRNA, complete cds [NM_125328]
A_84_P309643	-5.02808	-2.33001	5.02808	down		GB
A_84_P16043	-2.86633	-1.51921	2.86633	down	AT5G37420	Arabidopsis thaliana uncharacterized protein (AT5G37420) mRNA, complete cds [NM_123101]
A_84_P554467	-2.75363	-1.46133	2.75363	down	AT2G46535	Arabidopsis thaliana uncharacterized protein (AT2G46535) mRNA, complete cds [NM_180126]
A_84_P813460	-2.13731	-1.0958	2.13731	down	AT5G09460	Arabidopsis thaliana transcription factor bHLH143 (AT5G09460) mRNA, complete cds [NM_120983]
A_84_P823530	-5.27233	-2.39844	5.27233	down	JMT	Arabidopsis thaliana jasmonic acid carboxyl methyltransferase (JMT) mRNA, complete cds [NM_101820]
A_84_P10828	-10.8373	-3.43794	10.8373	down	AT1G34580	Arabidopsis thaliana sugar transport protein 5 (AT1G34580) mRNA, complete cds [NM_103182]
A_84_P13963	-6.6313	-2.72929	6.6313	down	TT4	Arabidopsis thaliana chalcone synthase (TT4) mRNA, complete cds [NM_121396]
A_84_P282650	-3.16537	-1.66237	3.16537	down	AT1G28710	Arabidopsis thaliana nucleotide-diphospho-sugar transferase domain-containing protein (AT1G28710) mRNA, complete cds [NM_102638]
A_84_P17941	-2.08582	-1.06061	2.08582	down	AT2G07718	Arabidopsis thaliana Cytochrome b/b6 protein (AT2G07718) mRNA, complete cds [NM_126756]
A_84_P16757	-2.02706	-1.01939	2.02706	down	AT5G01200	Arabidopsis thaliana duplicated SANT DNA-binding domain-containing protein (AT5G01200) mRNA, complete cds [NM_120198]
A_84_P849837	-12.6055	-3.65598	12.6055	down		Rep: Isoform 2 of Q9SBI0 - Arabidopsis thaliana (Mouse-ear cress), complete [TC368289]
A_84_P59770	-2.11274	-1.07911	2.11274	down	AT3G42130	Arabidopsis thaliana glycine-rich protein (AT3G42130) mRNA, complete cds [NM_114080]
A_84_P19302	-3.61784	-1.85513	3.61784	down	AT3G23220	Arabidopsis thaliana ethylene-responsive transcription factor ERF095 (AT3G23220) mRNA, complete cds [NM_113223]
A_84_P22129	-2.91445	-1.54323	2.91445	down	OLEO4	Arabidopsis thaliana oleosin 4 (OLEO4) mRNA, complete cds [NM_113682]
A_84_P10609	-2.08485	-1.05995	2.08485	down	TAT3	Arabidopsis thaliana tyrosine aminotransferase 3 (TAT3) mRNA, complete cds [NM_128044]
A_84_P21787	-3.72843	-1.89857	3.72843	down	AT1G04570	Arabidopsis thaliana integral membrane transporter family protein (AT1G04570) mRNA, complete cds [NM_100336]
A_84_P846190	-2.35993	-1.23874	2.35993	down		Rep: AP2-like ethylene-responsive transcription factor At2g41710 - Arabidopsis thaliana (Mouse-ear cress), complete [TC364894]
A_84_P22360	-8.1225	-3.02192	8.1225	down	AT4G26660	Arabidopsis thaliana uncharacterized protein (AT4G26660) mRNA, complete cds [NM_118800]
A_84_P290244	-2.22143	-1.15149	2.22143	down	AT1G68945	Arabidopsis thaliana uncharacterized protein (AT1G68945) mRNA, complete cds [NM_148643]
A_84_P765489	-6.73858	-2.75245	6.73858	down	AT4G05091	Arabidopsis thaliana uncharacterized protein (AT4G05091) mRNA, complete cds [NM_001125466]
A_84_P500331	-2.10368	-1.07291	2.10368	down	AT2G34360	Arabidopsis thaliana MATE efflux family protein (AT2G34360) mRNA, complete cds [NM_128988]
A_84_P22076	-2.37049	-1.24519	2.37049	down	AT2G13820	Arabidopsis thaliana Non-specific lipid-transfer protein-like protein (AT2G13820) mRNA, complete cds [NM_126958]
A_84_P790687	-20.5355	-4.36005	20.5355	down	AT3G23470	Arabidopsis thaliana Cyclopropane-fatty-acyl-phospholipid synthase (AT3G23470) mRNA, complete cds [NM_113250]
A_84_P548594	-2.30792	-1.20659	2.30792	down	AT5G05840	Arabidopsis thaliana uncharacterized protein (AT5G05840) mRNA, complete cds [NM_120666]
A_84_P543246	-2.27208	-1.18402	2.27208	down	AT4G37295	Arabidopsis thaliana uncharacterized protein (AT4G37295) mRNA, complete cds [NM_119893]
A_84_P760097	-7.09544	-2.82689	7.09544	down	GRF4	Arabidopsis thaliana growth-regulating factor 4 (GRF4) mRNA, complete cds [NM_115151]
A_84_P600928	-11.917	-3.57494	11.917	down	AT4G01535	Arabidopsis thaliana uncharacterized protein (AT4G01535) mRNA, complete cds [NM_148188]
A_84_P14270	-3.45478	-1.78859	3.45478	down	AT1G73040	Arabidopsis thaliana jacalin-like lectin domain-containing protein (AT1G73040) mRNA, complete cds [NM_105962]
A_84_P13975	-4.9631	-2.31124	4.9631	down	BUD2	Arabidopsis thaliana S-adenosylmethionine decarboxylase (BUD2) mRNA, complete cds [NM_121898]
A_84_P835567	-26.9832	-4.75399	26.9832	down
A_84_P761538	-7.31121	-2.87011	7.31121	down	AT3G22142	Arabidopsis thaliana bifunctional inhibitor/lipid transfer protein/seed storage protein-like protein (AT3G22142) mRNA, complete cds [NM_001084730]
A_84_P24041	-3.42197	-1.77483	3.42197	down	AT3G20370	Arabidopsis thaliana TRAF-like family protein (AT3G20370) mRNA, complete cds [NM_112928]
A_84_P10076	-5.52441	-2.46582	5.52441	down	YUC8	Arabidopsis thaliana flavin-containing monooxygenase-like protein (YUC8) mRNA, complete cds [NM_119016]
A_84_P20549	-2.30399	-1.20414	2.30399	down	FLA11	Arabidopsis thaliana fasciclin-like arabinogalactan protein 11 (FLA11) mRNA, complete cds [NM_120395]
A_84_P94139	-2.19866	-1.13663	2.19866	down	FCA	Arabidopsis thaliana RNA binding / abscisic acid binding protein (FCA) mRNA, complete cds [NM_179211]
A_84_P14416	-5.08349	-2.34582	5.08349	down		GB
A_84_P226219	-2.00655	-1.00472	2.00655	down	CPuORF51	Arabidopsis thaliana conserved peptide upstream open reading frame 51 (CPuORF51) mRNA, complete cds [NM_001125363]
A_84_P542792	-8.14802	-3.02645	8.14802	down	iqd8	Arabidopsis thaliana IQ-domain 8 protein (iqd8) mRNA, complete cds [NM_105926]
A_84_P14928	-3.02048	-1.59478	3.02048	down	SQP2	Arabidopsis thaliana Squalene monooxygenase 2 (SQP2) mRNA, complete cds [NM_122319]
A_84_P205628	-7.09084	-2.82596	7.09084	down		GB
A_84_P99706	-3.26391	-1.7066	3.26391	down	AT5G18460	Arabidopsis thaliana uncharacterized protein (AT5G18460) mRNA, complete cds [NM_121851]
A_84_P21306	-3.65995	-1.87182	3.65995	down	NTT	Arabidopsis thaliana C2H2-type zinc finger protein (NTT) mRNA, complete cds [NM_115627]
A_84_P14783	-2.56449	-1.35867	2.56449	down	AT4G24780	Arabidopsis thaliana putative pectate lyase 18 (AT4G24780) mRNA, complete cds [NM_118611]
A_84_P826009	-2.03884	-1.02775	2.03884	down	AT1G12380	Arabidopsis thaliana uncharacterized protein (AT1G12380) mRNA, complete cds [NM_101110]
A_84_P539632	-5.67986	-2.50586	5.67986	down	AT4G13990	Arabidopsis thaliana Exostosin family protein (AT4G13990) mRNA, complete cds [NM_117474]
A_84_P103886	-2.48637	-1.31404	2.48637	down	TBL45	Arabidopsis thaliana trichome birefringence-like 45 protein (TBL45) mRNA, complete cds [NM_128556]
A_84_P10266	-4.63559	-2.21275	4.63559	down	AT5G48900	Arabidopsis thaliana putative pectate lyase 20 (AT5G48900) mRNA, complete cds [NM_124267]
A_84_P15097	-2.26838	-1.18166	2.26838	down	AT1G35290	Arabidopsis thaliana thioesterase family protein (AT1G35290) mRNA, complete cds [NM_103226]
A_84_P22110	-4.35368	-2.12224	4.35368	down	LTP6	Arabidopsis thaliana non-specific lipid-transfer protein 6 (LTP6) mRNA, complete cds [NM_111711]
A_84_P844156	-4.61945	-2.20772	4.61945	down
A_84_P569306	-6.05078	-2.59712	6.05078	down	DD18	Arabidopsis thaliana protein downregulated in DIF1 18 (DD18) mRNA, complete cds [NM_103593]
A_84_P18279	-2.02049	-1.0147	2.02049	down	AT2G18890	Arabidopsis thaliana protein kinase-like protein (AT2G18890) mRNA, complete cds [NM_127445]
A_84_P769549	-20.5676	-4.3623	20.5676	down
A_84_P11067	-2.54513	-1.34774	2.54513	down	PMEI1	Arabidopsis thaliana pectinesterase inhibitor 1 (PMEI1) mRNA, complete cds [NM_103698]
A_84_P845705	-3.02778	-1.59826	3.02778	down	CYP722A1	Arabidopsis thaliana cytochrome P450, family 722, subfamily A, polypeptide 1 (CYP722A1) mRNA, complete cds [NM_101819]
A_84_P812141	-2.82906	-1.50032	2.82906	down	NSP1	Arabidopsis thaliana Nitrile-specifier protein 1 (NSP1) mRNA, complete cds [NM_112511]
A_84_P11467	-5.81019	-2.53859	5.81019	down	AGL56	Arabidopsis thaliana protein agamous-like 56 (AGL56) mRNA, complete cds [NM_104769]
A_84_P755365	-2.08747	-1.06176	2.08747	down	RR3	Arabidopsis thaliana two-component response regulator ARR8 (RR3) mRNA, complete cds [NM_129695]
A_84_P185484	-2.28561	-1.19258	2.28561	down	AT5G60050	Arabidopsis thaliana BTB/POZ domain-containing protein (AT5G60050) mRNA, complete cds [NM_125398]
A_84_P861779	-2.57751	-1.36598	2.57751	down
A_84_P821105	-2.15115	-1.10511	2.15115	down
A_84_P19517	-2.82006	-1.49572	2.82006	down		Rep: MATE efflux family protein - Arabidopsis thaliana, partial (91%) [TC368905]
A_84_P20303	-5.61311	-2.4888	5.61311	down	VPS24.2	Arabidopsis thaliana charged multivesicular body protein 3 (VPS24.2) mRNA, complete cds [NM_001161193]
A_84_P529896	-2.03702	-1.02646	2.03702	down	TBL24	Arabidopsis thaliana protein trichome birefringence-like 24 (TBL24) mRNA, complete cds [NM_118510]
A_84_P10640	-3.04359	-1.60577	3.04359	down	AT1G11220	Arabidopsis thaliana uncharacterized protein (AT1G11220) mRNA, complete cds [NM_100994]
A_84_P18985	-4.51891	-2.17598	4.51891	down	AT1G11740	Arabidopsis thaliana ankyrin repeats-containing protein (AT1G11740) mRNA, complete cds [NM_101046]
A_84_P797654	-3.4185	-1.77336	3.4185	down	AT1G73510	Arabidopsis thaliana uncharacterized protein (AT1G73510) mRNA, complete cds [NM_106010]
A_84_P10257	-2.15324	-1.10651	2.15324	down	AT1G29430	Arabidopsis thaliana SAUR-like auxin-responsive protein (AT1G29430) mRNA, complete cds [NM_102683]
A_84_P267350	-2.06555	-1.04653	2.06555	down	AT3G07500	Arabidopsis thaliana far-red impaired responsive 1-like protein (AT3G07500) mRNA, complete cds [NM_111628]
A_84_P575806	-2.08358	-1.05907	2.08358	down	AT3G07380	Arabidopsis thaliana uncharacterized protein (AT3G07380) mRNA, complete cds [NM_111617]
A_84_P10530	-4.89932	-2.29258	4.89932	down	TUB1	Arabidopsis thaliana tubulin beta (TUB1) mRNA, complete cds [NM_106228]
A_84_P51570	-18.8125	-4.23362	18.8125	down	UBQ12	Arabidopsis thaliana polyubiquitin 12 (UBQ12) mRNA, complete cds [NM_104380]
A_84_P13353	-4.47978	-2.16343	4.47978	down	MYB90	Arabidopsis thaliana transcription factor MYB90 (MYB90) mRNA, complete cds [NM_105310]
A_84_P834314	-4.78639	-2.25894	4.78639	down	AT5G50990	Arabidopsis thaliana pentatricopeptide repeat-containing protein (AT5G50990) mRNA, complete cds [NM_124478]
A_84_P555470	-2.46627	-1.30233	2.46627	down	AT3G48480	Arabidopsis thaliana cysteine-type peptidase (AT3G48480) mRNA, complete cds [NM_114706]
A_84_P585503	-5.76477	-2.52726	5.76477	down	AT2G14635	Arabidopsis thaliana uncharacterized protein (AT2G14635) mRNA, complete cds [NM_201728]
A_84_P607303	-4.50751	-2.17233	4.50751	down	AT5G12300	Arabidopsis thaliana calcium-dependent lipid-binding domain-containing protein (AT5G12300) mRNA, complete cds [NM_121268]
A_84_P765013	-4.03194	-2.01147	4.03194	down
A_84_P758347	-6.41748	-2.68201	6.41748	down	AT2G36261	Arabidopsis thaliana uncharacterized protein (AT2G36261) mRNA, complete cds [NM_001124979]
A_84_P21729	-2.94151	-1.55656	2.94151	down	AT2G16595	Arabidopsis thaliana Translocon-associated protein (TRAP), alpha subunit (AT2G16595) mRNA, complete cds [NM_127211]
A_84_P259610	-2.56462	-1.35875	2.56462	down	AT3G01240	Arabidopsis thaliana uncharacterized protein (AT3G01240) mRNA, complete cds [NM_110990]
A_84_P279940	-2.87611	-1.52412	2.87611	down	AT4G30830	Arabidopsis thaliana uncharacterized protein (AT4G30830) mRNA, complete cds [NM_119230]
A_84_P819706	-2.4859	-1.31377	2.4859	down	ABF3	Arabidopsis thaliana abscisic acid-insensitive 5-like protein 6 (ABF3) mRNA, complete cds [NM_179159]
A_84_P520692	-7.03728	-2.81502	7.03728	down	AT2G20970	Arabidopsis thaliana putative lipid binding protein (AT2G20970) mRNA, complete cds [NM_001161054]
A_84_P13010	-16.0797	-4.00717	16.0797	down	SHN3	Arabidopsis thaliana ethylene-responsive transcription factor SHINE 2 (SHN3) mRNA, complete cds [NM_121157]
A_84_P11013	-53.5731	-5.74344	53.5731	down	AT4G26730	Arabidopsis thaliana S-adenosyl-L-methionine-dependent methyltransferase-like protein (AT4G26730) mRNA, complete cds [NM_118807]
A_84_P17286	-2.06822	-1.04839	2.06822	down	MEE25	Arabidopsis thaliana UDP-arabinose 4-epimerase (MEE25) mRNA, complete cds [NM_179907]
A_84_P509620	-2.04465	-1.03185	2.04465	down	AT5G19950	Arabidopsis thaliana uncharacterized protein (AT5G19950) mRNA, complete cds [NM_180523]
A_84_P807539	-4.91631	-2.29758	4.91631	down	F3H	Arabidopsis thaliana Naringenin,2-oxoglutarate 3-dioxygenase (F3H) mRNA, complete cds [NM_114983]
A_84_P18258	-2.50967	-1.3275	2.50967	down	TPS10	Arabidopsis thaliana myrcene/ocimene synthase (TPS10) mRNA, complete cds [NM_127982]
A_84_P16544	-2.90846	-1.54025	2.90846	down	KRP2	Arabidopsis thaliana cyclin-dependent kinase inhibitor 2 (KRP2) mRNA, complete cds [NM_114923]
A_84_P22154	-2.43282	-1.28263	2.43282	down	AT3G29680	Arabidopsis thaliana HXXXD-type acyl-transferase-like protein (AT3G29680) mRNA, complete cds [NM_113890]
A_84_P16381	-3.9498	-1.98178	3.9498	down	AT2G34190	Arabidopsis thaliana nucleobase-ascorbate transporter 2 (AT2G34190) mRNA, complete cds [NM_128970]
A_84_P114892	-11.9967	-3.58456	11.9967	down	AT1G61270	Arabidopsis thaliana Lysine histidine transporter-like 3 (AT1G61270) mRNA, complete cds [NM_104808]
A_84_P522811	-2.21886	-1.14982	2.21886	down	AT4G23720	Arabidopsis thaliana uncharacterized protein (AT4G23720) mRNA, complete cds [NM_118503]
A_84_P53240	-2.38892	-1.25636	2.38892	down	AT1G22160	Arabidopsis thaliana uncharacterized protein (AT1G22160) mRNA, complete cds [NM_102066]
A_84_P516780	-2.70848	-1.43748	2.70848	down	AT5G43480	Arabidopsis thaliana uncharacterized protein (AT5G43480) mRNA, complete cds [NM_123714]
A_84_P764102	-4.65602	-2.2191	4.65602	down	AT4G18690	Arabidopsis thaliana uncharacterized protein (AT4G18690) mRNA, complete cds [NM_117985]
A_84_P755071	-12.3994	-3.6322	12.3994	down
A_84_P820799	-4.56305	-2.19	4.56305	down
A_84_P561025	-2.9983	-1.58414	2.9983	down	AT5G18340	Arabidopsis thaliana U-box domain-containing protein 48 (AT5G18340) mRNA, complete cds [NM_121839]
A_84_P12826	-3.16141	-1.66057	3.16141	down	CBL5	Arabidopsis thaliana calcineurin B-like protein 5 (CBL5) mRNA, complete cds [NM_116372]
A_84_P793206	-5.78451	-2.5322	5.78451	down	AAP5	BP601089 RAFL16 Arabidopsis thaliana cDNA clone RAFL16-48-L21 3', mRNA sequence [BP601089]
A_84_P21586	-2.02123	-1.01523	2.02123	down	AT1G72250	Arabidopsis thaliana Di-glucose binding protein with Kinesin motor domain (AT1G72250) mRNA, complete cds [NM_001198449]
A_84_P12184	-2.22953	-1.15674	2.22953	down	BGAL4	Arabidopsis thaliana beta-galactosidase 4 (BGAL4) mRNA, complete cds [NM_125070]
A_84_P179234	-19.6134	-4.29377	19.6134	down	AT5G46770	Arabidopsis thaliana uncharacterized protein (AT5G46770) mRNA, complete cds [NM_124047]
A_84_P756165	-22.9459	-4.52017	22.9459	down	AT2G05400	Arabidopsis thaliana Ubiquitin-specific protease family C19-related protein (AT2G05400) mRNA, complete cds [NM_001124802]
A_84_P839829	-3.0361	-1.60222	3.0361	down	AT3G51220	Arabidopsis thaliana uncharacterized protein (AT3G51220) mRNA, complete cds [NM_114981]
A_84_P18484	-5.28823	-2.40278	5.28823	down	MTPA1	Arabidopsis thaliana metal tolerance protein A1 (MTPA1) mRNA, complete cds [NM_116059]
A_84_P836962	-6.47568	-2.69503	6.47568	down	AT4G35560	Arabidopsis thaliana transducin/WD40 domain-containing protein (AT4G35560) mRNA, complete cds [NM_119721]
A_84_P22171	-3.71954	-1.89512	3.71954	down	TOPII	Arabidopsis thaliana DNA topoisomerase 2 (TOPII) mRNA, complete cds [NM_113294]
A_84_P853697	-2.82344	-1.49746	2.82344	down		CAB63010.1 - Arabidopsis thaliana (Mouse-ear cress), partial (12%) [TC393895]
A_84_P22554	-3.09347	-1.62923	3.09347	down	NF-YB2	Arabidopsis thaliana nuclear transcription factor Y subunit B-2 (NF-YB2) mRNA, complete cds [NM_124138]
A_84_P21146	-2.96816	-1.56957	2.96816	down	AT3G07450	Arabidopsis thaliana protease inhibitor/seed storage/lipid transfer protein (LTP) family protein (AT3G07450) mRNA, complete cds [NM_111624]
A_84_P21571	-3.04907	-1.60837	3.04907	down	ALY4	Arabidopsis thaliana THO complex subunit 4 (ALY4) mRNA, complete cds [NM_123131]
A_84_P15040	-3.46877	-1.79442	3.46877	down	AT5G61660	Arabidopsis thaliana glycine-rich protein (AT5G61660) mRNA, complete cds [NM_125560]
A_84_P14510	-3.26903	-1.70886	3.26903	down	EXPA15	Arabidopsis thaliana expansin A15 (EXPA15) mRNA, complete cds [NM_126361]
A_84_P100746	-6.06737	-2.60107	6.06737	down	AT3G28220	Arabidopsis thaliana TRAF-like family protein (AT3G28220) mRNA, complete cds [NM_113741]
A_84_P12842	-20.5376	-4.3602	20.5376	down	KNAT1	Arabidopsis thaliana homeobox protein knotted-1-like 1 (KNAT1) mRNA, complete cds [NM_116884]
A_84_P850782	-6.13677	-2.61748	6.13677	down		Rep: Probable cysteine proteinase At4g11310 precursor - Arabidopsis thaliana (Mouse-ear cress), partial (28%) [TC393194]
A_84_P760622	-5.84631	-2.54753	5.84631	down
A_84_P84459	-2.39913	-1.26251	2.39913	down	AT5G65683	Arabidopsis thaliana C3H4 type zinc finger protein (AT5G65683) mRNA, complete cds [NM_148162]
A_84_P756736	-6.85068	-2.77625	6.85068	down
A_84_P761903	-5.62694	-2.49235	5.62694	down	AT3G19790	Arabidopsis thaliana uncharacterized protein (AT3G19790) mRNA, complete cds [NM_001084721]
A_84_P271670	-2.03107	-1.02224	2.03107	down		Rep: Protein BCCIP homolog - Arabidopsis thaliana (Mouse-ear cress), partial (56%) [TC378779]
A_84_P19619	-2.36187	-1.23993	2.36187	down	MYB76	Arabidopsis thaliana myb domain protein 76 (MYB76) mRNA, complete cds [NM_120852]
A_84_P854379	-9.10734	-3.18703	9.10734	down	SAMC2	Arabidopsis thaliana S-adenosylmethionine carrier 2 (SAMC2) mRNA, complete cds [NM_103129]
A_84_P847741	-2.31003	-1.20791	2.31003	down
A_84_P850851	-5.6335	-2.49403	5.6335	down
A_84_P849984	-2.15501	-1.10769	2.15501	down	AT3G56080	Arabidopsis thaliana At3g56080 mRNA sequence [AY059794]
A_84_P12162	-2.08559	-1.06045	2.08559	down	AT1G29680	Arabidopsis thaliana uncharacterized protein (AT1G29680) mRNA, complete cds [NM_102708]
A_84_P756901	-4.96063	-2.31052	4.96063	down
A_84_P12415	-2.75297	-1.46099	2.75297	down	AT1G27660	Arabidopsis thaliana transcription factor bHLH110 (AT1G27660) mRNA, complete cds [NM_102531]
A_84_P835152	-2.48337	-1.3123	2.48337	down	AT1G20550	Arabidopsis thaliana O-fucosyltransferase-like protein (AT1G20550) mRNA, complete cds [NM_101905]
A_84_P23619	-2.80749	-1.48928	2.80749	down		Rep: Chromosome chr13 scaffold_48, whole genome shotgun sequence - Vitis vinifera (Grape), partial (12%) [TC395959]
A_84_P556782	-3.36454	-1.75041	3.36454	down	AT5G61940	Arabidopsis thaliana Ubiquitin carboxyl-terminal hydrolase-related protein (AT5G61940) mRNA, complete cds [NM_125587]
A_84_P860475	-3.88686	-1.95861	3.88686	down		Rep: Pspzf zinc finger protein-like - Arabidopsis thaliana (Mouse-ear cress), partial (18%) [TC400366]
A_84_P185584	-8.82769	-3.14204	8.82769	down	AT4G39590	Arabidopsis thaliana F-box/kelch-repeat protein (AT4G39590) mRNA, complete cds [NM_120119]
A_84_P842252	-2.97917	-1.57491	2.97917	down	JMT	Arabidopsis thaliana jasmonic acid carboxyl methyltransferase (JMT) mRNA, complete cds [NM_101820]
A_84_P754014	-5.10086	-2.35074	5.10086	down	AT1G36942	Arabidopsis thaliana uncharacterized protein (AT1G36942) mRNA, complete cds [NM_001123948]
A_84_P759203	-4.884	-2.28806	4.884	down	AT3G30730	Arabidopsis thaliana uncharacterized protein (AT3G30730) mRNA, complete cds [NM_113976]
A_84_P12484	-3.46296	-1.79201	3.46296	down	AT1G58170	Arabidopsis thaliana Disease resistance-responsive (dirigent-like protein) family protein (AT1G58170) mRNA, complete cds [NM_104598]
A_84_P844951	-10.5924	-3.40495	10.5924	down
A_84_P15503	-20.6568	-4.36854	20.6568	down	HSFA6B	Arabidopsis thaliana heat stress transcription factor A-6b (HSFA6B) mRNA, complete cds [NM_113182]
A_84_P10842	-11.8839	-3.57094	11.8839	down	AL3	Arabidopsis thaliana protein alfin-like 3 (AL3) mRNA, complete cds [NM_114147]
A_84_P819004	-6.0348	-2.5933	6.0348	down
A_84_P23054	-2.30303	-1.20353	2.30303	down	AT3G09540	Arabidopsis thaliana pectate lyase (AT3G09540) mRNA, complete cds [NM_111788]
A_84_P768252	-2.10963	-1.07699	2.10963	down	AT5G43525	Arabidopsis thaliana defensin-like protein 212 (AT5G43525) mRNA, complete cds [NM_001036928]
A_84_P20779	-3.76311	-1.91193	3.76311	down	AT2G07714	Arabidopsis thaliana transcription factor-related protein (AT2G07714) mRNA, complete cds [NM_126754]
A_84_P13874	-2.23242	-1.15861	2.23242	down	AT4G32670	Arabidopsis thaliana ubiquitin-protein ligase MARCH6 (AT4G32670) mRNA, complete cds [NM_119419]
A_84_P765771	-27.3078	-4.77124	27.3078	down	AT4G16024	Arabidopsis thaliana uncharacterized protein (AT4G16024) mRNA, complete cds [NM_001125517]
A_84_P758675	-3.86447	-1.95027	3.86447	down	RLP26	BX835110 Arabidopsis thaliana Flowers and buds Col-0 Arabidopsis thaliana cDNA clone GSLTFB91ZF09 3PRIM, mRNA sequence [BX835110]
A_84_P15081	-4.94852	-2.307	4.94852	down	EIL2	Arabidopsis thaliana ethylene insensitive 3-like 2 protein (EIL2) mRNA, complete cds [NM_122120]
A_84_P85289	-2.92451	-1.54819	2.92451	down	APRL5	Arabidopsis thaliana protein alfin-like 5 (APRL5) mRNA, complete cds [NM_111257]
A_84_P807831	-2.14966	-1.10411	2.14966	down	TBL45	Arabidopsis thaliana trichome birefringence-like 45 protein (TBL45) mRNA, complete cds [NM_128556]
A_84_P93419	-2.46315	-1.30051	2.46315	down	RLP6	Arabidopsis thaliana receptor like protein 6 (RLP6) mRNA, complete cds [NM_103599]
A_84_P556760	-39.8836	-5.31772	39.8836	down	AT1G67450	Arabidopsis thaliana putative F-box protein (AT1G67450) mRNA, complete cds [NM_105412]
A_84_P763257	-5.65233	-2.49885	5.65233	down		Rep: MuDR transposable element - like protein - Arabidopsis thaliana (Mouse-ear cress), complete [TC363519]
A_84_P21430	-2.88628	-1.52921	2.88628	down	AT4G30250	Arabidopsis thaliana AAA domain-containing protein (AT4G30250) mRNA, complete cds [NM_119171]
A_84_P797128	-2.71998	-1.44359	2.71998	down	AT4G14350	AYARW80TR pooled cDNA populations Arabidopsis thaliana cDNA, mRNA sequence [EG439279]
A_84_P818534	-6.33861	-2.66417	6.33861	down	TT7	Arabidopsis thaliana Flavonoid 3'-monooxygenase (TT7) mRNA, complete cds [NM_120881]
A_84_P262140	-2.90895	-1.5405	2.90895	down	AT3G19370	Arabidopsis thaliana uncharacterized protein (AT3G19370) mRNA, complete cds [NM_112824]
A_84_P22126	-2.04239	-1.03026	2.04239	down	FAO3	Arabidopsis thaliana long-chain-alcohol oxidase FAO3 (FAO3) mRNA, complete cds [NM_113244]
A_84_P813906	-2.04854	-1.0346	2.04854	down
A_84_P309063	-2.22911	-1.15647	2.22911	down	AT3G61360	Arabidopsis thaliana pentatricopeptide repeat-containing protein (AT3G61360) mRNA, complete cds [NM_116000]
A_84_P814282	-2.85005	-1.51099	2.85005	down	KCS2	Arabidopsis thaliana 3-ketoacyl-CoA synthase 17 (KCS2) mRNA, complete cds [NM_100303]
A_84_P542903	-2.50052	-1.32223	2.50052	down		GB
A_84_P20702	-5.11017	-2.35337	5.11017	down	AGL82	Arabidopsis thaliana protein agamous-like 82 (AGL82) mRNA, complete cds [NM_125279]
A_84_P97886	-2.32349	-1.21629	2.32349	down	AT2G40130	Arabidopsis thaliana heat shock-related protein (AT2G40130) mRNA, complete cds [NM_201917]
A_84_P18661	-2.9383	-1.55498	2.9383	down	CYP77A4	Arabidopsis thaliana cytochrome P450, family 77, subfamily A, polypeptide 4 (CYP77A4) mRNA, complete cds [NM_120548]
A_84_P24078	-2.38229	-1.25235	2.38229	down	AT3G52270	Arabidopsis thaliana Transcription initiation factor IIF, beta subunit (AT3G52270) mRNA, complete cds [NM_115087]
A_84_P97126	-4.18646	-2.06573	4.18646	down	AT4G28430	Arabidopsis thaliana reticulon-like protein B18 (AT4G28430) mRNA, complete cds [NM_118985]
A_84_P19581	-4.08149	-2.0291	4.08149	down	FH3	Arabidopsis thaliana formin 3 (FH3) mRNA, complete cds [NM_001203807]
A_84_P799739	-2.74356	-1.45605	2.74356	down		Arabidopsis thaliana mRNA for hypothetical protein, complete cds, clone: RAFL21-96-A04 [AK221827]
A_84_P826703	-2.89605	-1.53409	2.89605	down	DEAR3	Arabidopsis thaliana ethylene-responsive transcription factor ERF008 (DEAR3) mRNA, complete cds [NM_127898]
A_84_P581880	-2.58046	-1.36763	2.58046	down	AT1G78120	Arabidopsis thaliana tetratricopeptide repeat-containing protein (AT1G78120) mRNA, complete cds [NM_106462]
A_84_P231139	-10.8396	-3.43823	10.8396	down	AT2G42060	Arabidopsis thaliana cysteine/histidine-rich C1 domain-containing protein (AT2G42060) mRNA, complete cds [NM_129769]
A_84_P788302	-2.06491	-1.04608	2.06491	down	RAD51B	Arabidopsis thaliana DNA repair protein RAD51-like 2 (RAD51B) mRNA, complete cds [NM_128416]
A_84_P760113	-3.73186	-1.8999	3.73186	down
A_84_P300860	-5.03928	-2.33322	5.03928	down
A_84_P551649	-5.49486	-2.45808	5.49486	down	AT1G74055	Arabidopsis thaliana uncharacterized protein (AT1G74055) mRNA, complete cds [NM_106065]
A_84_P20589	-3.75486	-1.90876	3.75486	down	PIN5	Arabidopsis thaliana putative auxin efflux carrier component 8 (PIN5) mRNA, complete cds [NM_121659]
A_84_P11160	-5.65101	-2.49851	5.65101	down	AT5G27550	Arabidopsis thaliana ATP binding / microtubule motor (AT5G27550) mRNA, complete cds [NM_122637]
A_84_P835897	-6.2787	-2.65047	6.2787	down
A_84_P512910	-5.7167	-2.51518	5.7167	down	AT3G45490	Arabidopsis thaliana uncharacterized protein (AT3G45490) mRNA, complete cds [NM_114418]
A_84_P564918	-2.03107	-1.02224	2.03107	down	AT1G69280	Arabidopsis thaliana uncharacterized protein (AT1G69280) mRNA, complete cds [NM_105595]
A_84_P790466	-2.07092	-1.05027	2.07092	down	AT5G38130	Arabidopsis thaliana Full-length cDNA Complete sequence from clone GSLTFB35ZD10 of Flowers and buds of strain col-0 of Arabidopsis thaliana (thale cress) [BX829766]
A_84_P570783	-2.88848	-1.53031	2.88848	down	AT5G10100	Arabidopsis thaliana haloacid dehalogenase-like hydrolase domain-containing protein (AT5G10100) mRNA, complete cds [NM_121048]
A_84_P520845	-5.16121	-2.36771	5.16121	down	AT3G17230	Arabidopsis thaliana invertase/pectin methylesterase inhibitor-like protein (AT3G17230) mRNA, complete cds [NM_112600]
A_84_P824953	-2.80991	-1.49052	2.80991	down	GATL3	Arabidopsis thaliana putative galacturonosyltransferase-like 3 (GATL3) mRNA, complete cds [NM_101196]
A_84_P853518	-5.75242	-2.52417	5.75242	down	JR1	Arabidopsis thaliana myrosinase-binding-like protein (JR1) mRNA, complete cds [NM_001035635]
A_84_P193344	-2.39389	-1.25936	2.39389	down	AT2G23790	Arabidopsis thaliana uncharacterized protein (AT2G23790) mRNA, complete cds [NM_127942]
A_84_P17720	-3.71128	-1.89192	3.71128	down	CYC1BAT	Arabidopsis thaliana cyclin-B1-2 (CYC1BAT) mRNA, complete cds [NM_120697]
A_84_P555244	-6.1675	-2.62468	6.1675	down	AT2G14830	Arabidopsis thaliana Regulator of Vps4 activity in the MVB pathway protein (AT2G14830) mRNA, complete cds [NM_127047]
A_84_P836109	-5.0373	-2.33265	5.0373	down	AT4G13990	Arabidopsis thaliana Exostosin family protein (AT4G13990) mRNA, complete cds [NM_117474]
A_84_P826231	-13.343	-3.73801	13.343	down	AT4G14200	Arabidopsis thaliana pentatricopeptide repeat-containing protein-like protein (AT4G14200) mRNA, complete cds [NM_117497]
A_84_P22895	-2.03729	-1.02665	2.03729	down	AT2G41870	Arabidopsis thaliana remorin-like protein (AT2G41870) mRNA, complete cds [NM_129751]
A_84_P840044	-4.85865	-2.28055	4.85865	down		GB
A_84_P853607	-2.35376	-1.23497	2.35376	down
A_84_P787591	-2.19565	-1.13465	2.19565	down	AT4G15450	Arabidopsis thaliana Senescence/dehydration-associated protein-like protein (AT4G15450) mRNA, complete cds [NM_117634]
A_84_P20419	-2.07766	-1.05496	2.07766	down	LBD2	Arabidopsis thaliana LOB domain-containing protein 2 (LBD2) mRNA, complete cds [NM_100510]
A_84_P534217	-6.30017	-2.65539	6.30017	down	AT3G48240	Arabidopsis thaliana octicosapeptide/Phox/Bem1p domain-containing protein (AT3G48240) mRNA, complete cds [NM_114694]
A_84_P794478	-2.91899	-1.54547	2.91899	down		BX834370 Arabidopsis thaliana Adult vegetative tissue Col-0 Arabidopsis thaliana cDNA clone GSLTLS15ZA01 3PRIM, mRNA sequence [BX834370]
A_84_P767156	-4.64046	-2.21427	4.64046	down
A_84_P800511	-6.28431	-2.65176	6.28431	down	TET14	Arabidopsis thaliana tetraspanin14 (TET14) mRNA, complete cds [NM_126257]
A_84_P821679	-2.35189	-1.23382	2.35189	down	UGT71B1	Arabidopsis thaliana UDP-glucosyl transferase 71B1 (UGT71B1) mRNA, complete cds [NM_113070]
A_84_P592843	-21.0439	-4.39533	21.0439	down	AT3G29580	Arabidopsis thaliana MATH domain-containing protein (AT3G29580) mRNA, complete cds [NM_113879]
A_84_P802888	-2.11849	-1.08304	2.11849	down
A_84_P828241	-2.04196	-1.02995	2.04196	down
A_84_P19512	-2.39907	-1.26248	2.39907	down	REN1	Arabidopsis thaliana Rho GTPase activation protein (RhoGAP) with PH domain (REN1) mRNA, complete cds [NM_118591]
A_84_P11878	-3.31782	-1.73023	3.31782	down	ATMYC1	Arabidopsis thaliana transcription factor MYC1 (ATMYC1) mRNA, complete cds [NM_116272]
A_84_P16720	-2.55063	-1.35085	2.55063	down	AT4G34880	Arabidopsis thaliana Amidase family protein (AT4G34880) mRNA, complete cds [NM_119654]
A_84_P15043	-5.92379	-2.56652	5.92379	down	AT5G62340	Arabidopsis thaliana plant invertase/pectin methylesterase inhibitor domain-containing protein (AT5G62340) mRNA, complete cds [NM_125628]
A_84_P23923	-6.71295	-2.74695	6.71295	down	AT2G37900	Arabidopsis thaliana putative peptide/nitrate transporter (AT2G37900) mRNA, complete cds [NM_129346]
A_84_P846436	-2.39065	-1.2574	2.39065	down	PEX13	Arabidopsis thaliana peroxin 13 (PEX13) mRNA, complete cds [NM_111634]
A_84_P268860	-2.26223	-1.17775	2.26223	down	AT4G01200	Arabidopsis thaliana calcium-dependent lipid-binding domain-containing protein (AT4G01200) mRNA, complete cds [NM_116350]
A_84_P763272	-7.78693	-2.96105	7.78693	down		AYBGM17TF pooled cDNA populations Arabidopsis thaliana cDNA, mRNA sequence [EG488096]
A_84_P755736	-9.68489	-3.27574	9.68489	down		Rep: F7F22.17 - Arabidopsis thaliana (Mouse-ear cress), partial (17%) [TC366461]
A_84_P594997	-5.27493	-2.39915	5.27493	down	AT5G62830	Arabidopsis thaliana F-box associated ubiquitination effector family protein (AT5G62830) mRNA, complete cds [NM_125678]
A_84_P839729	-50.2079	-5.64984	50.2079	down		GB
A_84_P831659	-8.74018	-3.12766	8.74018	down	TYRDC	Arabidopsis thaliana tyrosine decarboxylase (TYRDC) mRNA, complete cds [NM_001203932]
A_84_P848526	-3.85958	-1.94844	3.85958	down	AT3G17120	Arabidopsis thaliana uncharacterized protein (AT3G17120) mRNA, complete cds [NM_202597]
A_84_P19131	-2.6782	-1.42127	2.6782	down	AT2G23910	Arabidopsis thaliana Rossmann-fold NAD(P)-binding domain-containing protein (AT2G23910) mRNA, complete cds [NM_127952]
A_84_P18193	-2.32715	-1.21857	2.32715	down	LEA18	Arabidopsis thaliana late embryogenesis abundant group 1 protein (LEA18) mRNA, complete cds [NM_129082]
A_84_P281090	-2.78799	-1.47922	2.78799	down	AT5G18860	Arabidopsis thaliana inosine-uridine preferring nucleoside hydrolase family protein (AT5G18860) mRNA, complete cds [NM_121891]
A_84_P830772	-8.01184	-3.00213	8.01184	down	AT1G62970	Arabidopsis thaliana chaperone DnaJ-domain containing protein (AT1G62970) mRNA, complete cds [NM_104975]
A_84_P588319	-6.98272	-2.80379	6.98272	down	AT3G15250	Arabidopsis thaliana uncharacterized protein (AT3G15250) mRNA, complete cds [NM_112388]
A_84_P760666	-7.37158	-2.88197	7.37158	down
A_84_P18657	-2.16751	-1.11604	2.16751	down	JKD	Arabidopsis thaliana zinc finger protein JACKDAW (JKD) mRNA, complete cds [NM_120393]
A_84_P536931	-7.46945	-2.901	7.46945	down	AT3G63450	Arabidopsis thaliana RNA-binding (RRM/RBD/RNP motifs) family protein (AT3G63450) mRNA, complete cds [NM_001203241]
A_84_P822249	-6.14729	-2.61995	6.14729	down	HPL1	Arabidopsis thaliana hydroperoxide lyase 1 (HPL1) mRNA, complete cds [NM_117633]
A_84_P13048	-4.85207	-2.2786	4.85207	down	AGL39	Arabidopsis thaliana protein agamous-like 39 (AGL39) mRNA, complete cds [NM_122595]
A_84_P770223	-5.74472	-2.52224	5.74472	down
A_84_P818221	-28.0589	-4.81039	28.0589	down
A_84_P831472	-2.10466	-1.07359	2.10466	down	AT5G22700	Arabidopsis thaliana F-box/FBD/LRR-repeat protein (AT5G22700) mRNA, complete cds [NM_122176]
A_84_P751964	-4.68818	-2.22903	4.68818	down		AYAVF76TF pooled cDNA populations Arabidopsis thaliana cDNA, mRNA sequence [EG455649]
A_84_P14496	-3.3173	-1.73001	3.3173	down	VND1	Arabidopsis thaliana vascular related NAC-domain protein 1 (VND1) mRNA, complete cds [NM_127362]
A_84_P525087	-4.67451	-2.22482	4.67451	down		GB
A_84_P10880	-2.54803	-1.34938	2.54803	down	AT3G52490	Arabidopsis thaliana heat shock protein-like protein (AT3G52490) mRNA, complete cds [NM_115109]
A_84_P10644	-3.31739	-1.73005	3.31739	down	AT2G23210	Arabidopsis thaliana UDP-glycosyltransferase-like protein (AT2G23210) mRNA, complete cds [NM_127885]
A_84_P766572	-10.1491	-3.34328	10.1491	down
A_84_P816521	-2.05304	-1.03776	2.05304	down
A_84_P22947	-7.52741	-2.91215	7.52741	down	PID2	Arabidopsis thaliana protein pinoid2 (PID2) mRNA, complete cds [NM_128227]
A_84_P827207	-4.52988	-2.17947	4.52988	down
A_84_P12911	-6.67641	-2.73907	6.67641	down	NAC074	Arabidopsis thaliana NAC domain containing protein 74 (NAC074) mRNA, complete cds [NM_118995]
A_84_P797035	-6.6678	-2.73721	6.6678	down	AT2G46980	Arabidopsis thaliana uncharacterized protein (AT2G46980) mRNA, complete cds [NM_130266]
A_84_P750054	-3.8231	-1.93474	3.8231	down	AT1G12660	Arabidopsis thaliana uncharacterized protein (AT1G12660) mRNA, complete cds [NM_101136]
A_84_P13447	-3.61932	-1.85572	3.61932	down	AT2G25790	Arabidopsis thaliana Leucine-rich receptor-like protein kinase family protein (AT2G25790) mRNA, complete cds [NM_128139]
A_84_P17208	-2.11685	-1.08192	2.11685	down	IDD16	Arabidopsis thaliana ribonuclease P subunit RPR2 (IDD16) mRNA, complete cds [NM_102334]
A_84_P15114	-2.9651	-1.56808	2.9651	down	AT1G12380	Arabidopsis thaliana uncharacterized protein (AT1G12380) mRNA, complete cds [NM_101110]
A_84_P811955	-2.3889	-1.25634	2.3889	down		Rep: Uncharacterized protein At1g17140 - Arabidopsis thaliana (Mouse-ear cress), partial (6%) [TC396299]
A_84_P91639	-4.54885	-2.1855	4.54885	down	AT2G39030	Arabidopsis thaliana acyl-CoA N-acyltransferases-like protein (AT2G39030) mRNA, complete cds [NM_129460]
A_84_P707934	-3.56842	-1.83529	3.56842	down
A_84_P758300	-2.13188	-1.09213	2.13188	down	AT2G07825	Arabidopsis thaliana uncharacterized protein (AT2G07825) mRNA, complete cds [NM_001124816]
A_84_P265800	-2.60595	-1.38181	2.60595	down	VFB2	Arabidopsis thaliana F-box/LRR-repeat protein 16 (VFB2) mRNA, complete cds [NM_114868]
A_84_P305850	-2.23941	-1.16312	2.23941	down	GAD4	Arabidopsis thaliana glutamate decarboxylase 4 (GAD4) mRNA, complete cds [NM_126262]
A_84_P857373	-4.89803	-2.2922	4.89803	down
A_84_P802304	-15.7087	-3.97349	15.7087	down		205a03.p1 AtM1 Arabidopsis thaliana cDNA clone MPMGp2011A03205 5-PRIME, mRNA sequence [CK121003]
A_84_P788152	-2.86726	-1.51967	2.86726	down	AGL29	86-L022243-065-008-F11-SeLB MPIZ-ADIS-065d Arabidopsis thaliana cDNA clone 008-F11, mRNA sequence [DR749877]
A_84_P587896	-6.33288	-2.66286	6.33288	down	OFP12	Arabidopsis thaliana ovate family protein 12 (OFP12) mRNA, complete cds [NM_100421]
A_84_P793464	-2.88817	-1.53016	2.88817	down	STN8	AV439725 Arabidopsis thaliana above-ground organ two to six-week old Arabidopsis thaliana cDNA clone APD14f11_f 3', mRNA sequence [AV439725]
A_84_P17179	-2.06777	-1.04808	2.06777	down	AT1G75300	Arabidopsis thaliana NmrA-like negative transcriptional regulator-like protein (AT1G75300) mRNA, complete cds [NM_106185]
A_84_P18229	-17.6365	-4.14049	17.6365	down	ATC	Arabidopsis thaliana protein centroradialis (ATC) mRNA, complete cds [NM_128315]
A_84_P18708	-2.43908	-1.28634	2.43908	down	AAE17	Arabidopsis thaliana acyl-activating enzyme 17 (AAE17) mRNA, complete cds [NM_122211]
A_84_P768492	-2.61912	-1.38908	2.61912	down		GB
A_84_P572946	-2.25067	-1.17035	2.25067	down	AT1G67040	Arabidopsis thaliana uncharacterized protein (AT1G67040) mRNA, complete cds [NM_105374]
A_84_P791090	-5.1241	-2.3573	5.1241	down
A_84_P826324	-2.27023	-1.18284	2.27023	down
A_84_P141319	-2.54477	-1.34753	2.54477	down	AT4G27840	Arabidopsis thaliana SNARE-like family protein (AT4G27840) mRNA, complete cds [NM_118922]
A_84_P200704	-2.17263	-1.11944	2.17263	down	AT5G06270	Arabidopsis thaliana uncharacterized protein (AT5G06270) mRNA, complete cds [NM_120710]
A_84_P813692	-2.278	-1.18777	2.278	down	EFE	Arabidopsis thaliana 1-aminocyclopropane-1-carboxylate oxidase (EFE) mRNA, complete cds [NM_100380]
A_84_P716673	-2.37599	-1.24853	2.37599	down	RCAR3	BP619544 RAFL16 Arabidopsis thaliana cDNA clone RAFL16-33-K16 3', mRNA sequence [BP619544]
A_84_P15709	-2.05717	-1.04066	2.05717	down	PP2-A1	Arabidopsis thaliana protein PHLOEM protein 2-LIKE A1 (PP2-A1) mRNA, complete cds [NM_118104]
A_84_P12713	-7.52865	-2.91239	7.52865	down	HAF2	Arabidopsis thaliana transcription initiation factor TFIID subunit 1-B (HAF2) mRNA, complete cds [NM_112790]
A_84_P571538	-6.60812	-2.72424	6.60812	down		Rep: Isoform 2 of Q9SV82 - Arabidopsis thaliana (Mouse-ear cress), partial (59%) [TC380727]
A_84_P185644	-2.10241	-1.07204	2.10241	down	AT3G11690	Arabidopsis thaliana uncharacterized protein (AT3G11690) mRNA, complete cds [NM_112001]
A_84_P20172	-2.18233	-1.12587	2.18233	down	CYP710A2	Arabidopsis thaliana cytochrome P450, family 710, subfamily A (CYP710A2) mRNA, complete cds [NM_129001]
A_84_P11832	-4.76201	-2.25157	4.76201	down	AT3G53640	Arabidopsis thaliana protein kinase family protein (AT3G53640) mRNA, complete cds [NM_115224]
A_84_P11975	-2.42981	-1.28084	2.42981	down	AT4G30460	Arabidopsis thaliana glycine-rich protein (AT4G30460) mRNA, complete cds [NM_119192]
A_84_P810225	-2.78382	-1.47706	2.78382	down	PYK10	Arabidopsis thaliana beta-glucosidase 23 (PYK10) mRNA, complete cds [NM_111760]
A_84_P151248	-2.97093	-1.57092	2.97093	down	AT4G27570	Arabidopsis thaliana UDP-glycosyltransferase-like protein (AT4G27570) mRNA, complete cds [NM_118892]
A_84_P841711	-11.9787	-3.5824	11.9787	down		GB
A_84_P532027	-4.98724	-2.31824	4.98724	down	GLTP2	Arabidopsis thaliana glycolipid transfer protein 2 (GLTP2) mRNA, complete cds [NM_101988]
A_84_P23848	-4.49677	-2.16889	4.49677	down	ENODL14	Arabidopsis thaliana early nodulin-like protein 1 (ENODL14) mRNA, complete cds [NM_128063]
A_84_P13476	-2.86835	-1.52022	2.86835	down	PPa2	Arabidopsis thaliana soluble inorganic pyrophosphatase 2 (PPa2) mRNA, complete cds [NM_127380]
A_84_P800034	-2.23343	-1.15926	2.23343	down	AT4G16580	Arabidopsis thaliana putative protein phosphatase 2C 55 (AT4G16580) mRNA, complete cds [NM_117759]
A_84_P299600	-5.20798	-2.38072	5.20798	down	BUBR1	Arabidopsis thaliana checkpoint serine/threonine-protein kinase (BUBR1) mRNA, complete cds [NM_001202739]
A_84_P787776	-2.65341	-1.40785	2.65341	down	AT3G56260	Arabidopsis thaliana uncharacterized protein (AT3G56260) mRNA, complete cds [NM_115484]
A_84_P15825	-2.24421	-1.16621	2.24421	down	AT1G06660	Arabidopsis thaliana uncharacterized protein (AT1G06660) mRNA, complete cds [NM_100543]
A_84_P852618	-6.61976	-2.72678	6.61976	down	AT4G16620	Arabidopsis thaliana nodulin MtN21 /EamA-like transporter family protein (AT4G16620) mRNA, complete cds [NM_117763]
A_84_P134895	-2.84705	-1.50947	2.84705	down	CDC20.2	Arabidopsis thaliana cell division cycle 20, cofactor of APC complex (CDC20.2) mRNA, complete cds [NM_001203971]
A_84_P19582	-6.15006	-2.6206	6.15006	down	CYP705A3	Arabidopsis thaliana cytochrome P450, family 705, subfamily A, polypeptide 3 (CYP705A3) mRNA, complete cds [NM_117624]
A_84_P22977	-5.1775	-2.37226	5.1775	down	scpl10	Arabidopsis thaliana serine carboxypeptidase-like 10 (scpl10) mRNA, complete cds [NM_127865]
A_84_P211958	-2.92778	-1.54981	2.92778	down	AT5G43580	Arabidopsis thaliana Serine protease inhibitor, potato inhibitor I-type family protein (AT5G43580) mRNA, complete cds [NM_123724]
A_84_P22597	-2.01876	-1.01347	2.01876	down	AT5G59550	Arabidopsis thaliana C3H4 type zinc finger protein (AT5G59550) mRNA, complete cds [NM_125347]
A_84_P709078	-2.86841	-1.52025	2.86841	down	AT1G62850	Arabidopsis thaliana Class I peptide chain release factor (AT1G62850) mRNA, complete cds [NM_001084292]
A_84_P792613	-6.06653	-2.60087	6.06653	down		1104598 CERES-147 Arabidopsis thaliana cDNA clone 249964 5', mRNA sequence [DR232279]
A_84_P16270	-2.07433	-1.05265	2.07433	down	AT1G33612	Arabidopsis thaliana Leucine-rich repeat (LRR) family protein (AT1G33612) mRNA, complete cds [NM_001198202]
A_84_P868217	-17.2599	-4.10935	17.2599	down	MBP2	Arabidopsis thaliana myrosinase-binding protein 2 (MBP2) mRNA, complete cds [NM_179463]
A_84_P606061	-14.2017	-3.82799	14.2017	down	AT2G39520	Arabidopsis thaliana uncharacterized protein (AT2G39520) mRNA, complete cds [NM_129510]
A_84_P10650	-2.07377	-1.05226	2.07377	down	AT2G42270	Arabidopsis thaliana U5 small nuclear ribonucleoprotein helicase (AT2G42270) mRNA, complete cds [NM_129789]
A_84_P837525	-2.84814	-1.51002	2.84814	down	AT5G16720	Arabidopsis thaliana uncharacterized protein (AT5G16720) mRNA, complete cds [NM_121678]
A_84_P268810	-3.21612	-1.68532	3.21612	down	AT4G27560	Arabidopsis thaliana UDP-glycosyltransferase-like protein (AT4G27560) mRNA, complete cds [NM_118891]
A_84_P11700	-3.02612	-1.59747	3.02612	down	UGT72B3	Arabidopsis thaliana hydroquinone glucosyltransferase (UGT72B3) mRNA, complete cds [NM_100024]
A_84_P821521	-2.53271	-1.34068	2.53271	down
A_84_P737847	-2.9317	-1.55174	2.9317	down		Arabidopsis thaliana mRNA for hypothetical protein, complete cds, clone: RAFL15-29-F12 [AK228552]
A_84_P831728	-3.82881	-1.93689	3.82881	down	GSTF12	Arabidopsis thaliana glutathione S-transferase phi 12 (GSTF12) mRNA, complete cds [NM_121728]
A_84_P843563	-2.39837	-1.26206	2.39837	down		GB
A_84_P840464	-2.22403	-1.15318	2.22403	down		GB
A_84_P71544	-2.07704	-1.05453	2.07704	down	AT1G55380	Arabidopsis thaliana cysteine/histidine-rich C1 domain-containing protein (AT1G55380) mRNA, complete cds [NM_104414]
A_84_P22542	-16.3282	-4.0293	16.3282	down	AT5G44540	Arabidopsis thaliana Tapetum specific protein TAP35/TAP44 (AT5G44540) mRNA, complete cds [NM_123821]
A_84_P826714	-9.49802	-3.24763	9.49802	down	AT1G52000	Arabidopsis thaliana jacalin-like lectin domain-containing protein (AT1G52000) mRNA, complete cds [NM_104081]
A_84_P15728	-2.01608	-1.01155	2.01608	down	AGL24	Arabidopsis thaliana MADS-box protein AGL24 (AGL24) mRNA, complete cds [NM_118587]
A_84_P613622	-4.64587	-2.21595	4.64587	down	AT5G48310	Arabidopsis thaliana uncharacterized protein (AT5G48310) mRNA, complete cds [NM_124206]
A_84_P244835	-4.63114	-2.21137	4.63114	down	AT3G16020	Arabidopsis thaliana F-box associated ubiquitination effector protein (AT3G16020) mRNA, complete cds [NM_112472]
A_84_P520839	-6.58659	-2.71953	6.58659	down	AT3G16070	Arabidopsis thaliana uncharacterized protein (AT3G16070) mRNA, complete cds [NM_112477]
A_84_P798979	-5.93042	-2.56813	5.93042	down		Rep: MADS-box protein AGL27-I - Arabidopsis thaliana (Mouse-ear cress), partial (35%) [TC391281]
A_84_P813812	-3.30074	-1.72279	3.30074	down	LTP6	Arabidopsis thaliana non-specific lipid-transfer protein 6 (LTP6) mRNA, complete cds [NM_111711]
A_84_P709539	-2.09213	-1.06497	2.09213	down	ARF8	Arabidopsis thaliana mRNA for hypothetical protein, partial cds, clone: RAFL22-69-N24 [AK230074]
A_84_P816989	-3.1269	-1.64473	3.1269	down	AT4G32060	Arabidopsis thaliana EF-hand, calcium binding motif-containing protein (AT4G32060) mRNA, complete cds [NM_001085007]
A_84_P23648	-3.02282	-1.59589	3.02282	down	AT1G51170	Arabidopsis thaliana protein kinase domain-containing protein (AT1G51170) mRNA, complete cds [NM_103996]
A_84_P852537	-4.6028	-2.20251	4.6028	down	AT1G02150	Arabidopsis thaliana pentatricopeptide repeat-containing protein (AT1G02150) mRNA, complete cds [NM_100095]
A_84_P810605	-7.08368	-2.8245	7.08368	down	MLP423	Arabidopsis thaliana MLP-like protein 423 (MLP423) mRNA, complete cds [NM_102249]
A_84_P306200	-6.39308	-2.67651	6.39308	down	AT4G02655	Arabidopsis thaliana uncharacterized protein (AT4G02655) mRNA, complete cds [NM_001125448]
A_84_P841561	-19.9999	-4.32192	19.9999	down		GB
A_84_P10030	-5.73169	-2.51896	5.73169	down	NAC071	Arabidopsis thaliana NAC domain containing protein 71 (NAC071) mRNA, complete cds [NM_117908]
A_84_P799921	-2.60644	-1.38208	2.60644	down	PDIL5-4	BP832580 RAFL19 Arabidopsis thaliana cDNA clone RAFL22-93-B15 5', mRNA sequence [BP832580]
A_84_P16459	-3.8642	-1.95017	3.8642	down	GSL04	Arabidopsis thaliana callose synthase (GSL04) mRNA, complete cds [NM_112317]
A_84_P596454	-13.1335	-3.71518	13.1335	down	AT3G58260	Arabidopsis thaliana TRAF-like family protein (AT3G58260) mRNA, complete cds [NM_115688]
A_84_P579600	-4.10772	-2.03834	4.10772	down	AT4G24265	Arabidopsis thaliana uncharacterized protein (AT4G24265) mRNA, complete cds [NM_148370]
A_84_P835866	-2.26821	-1.18155	2.26821	down	AT5G44410	Arabidopsis thaliana FAD-binding and BBE domain-containing protein (AT5G44410) mRNA, complete cds [NM_123808]
A_84_P833637	-2.05498	-1.03913	2.05498	down	AT3G51940	Arabidopsis thaliana uncharacterized protein (AT3G51940) mRNA, complete cds [NM_115053]
A_84_P17831	-3.2708	-1.70964	3.2708	down	AT1G29600	Arabidopsis thaliana putative zinc finger CCCH domain-containing protein 10 (AT1G29600) mRNA, complete cds [NM_102700]
A_84_P789849	-2.00083	-1.0006	2.00083	down	AT4G23540	Arabidopsis thaliana NUC173 domain-containing protein (AT4G23540) mRNA, complete cds [NM_118485]
A_84_P602281	-2.40551	-1.26634	2.40551	down	AT1G35830	Arabidopsis thaliana VQ motif-containing protein (AT1G35830) mRNA, complete cds [NM_103283]
A_84_P22439	-2.39988	-1.26296	2.39988	down	HTA12	Arabidopsis thaliana histone H2A 12 (HTA12) mRNA, complete cds [NM_001203279]
A_84_P756765	-4.54105	-2.18303	4.54105	down	MAPR2	Arabidopsis thaliana putative steroid-binding protein 3 (MAPR2) mRNA, complete cds [NM_128052]
A_84_P500157	-2.01698	-1.0122	2.01698	down	DRP5A	Arabidopsis thaliana Dynamin related protein 5A (DRP5A) mRNA, complete cds [NM_104193]
A_84_P819249	-2.19034	-1.13116	2.19034	down		Rep: Beta-1,3-glucanase-like protein - Arabidopsis thaliana (Mouse-ear cress), complete [TC389033]
A_84_P14084	-5.81785	-2.54049	5.81785	down	ROPGEF2	Arabidopsis thaliana Rop guanine nucleotide exchange factor 2 (ROPGEF2) mRNA, complete cds [NM_100052]
A_84_P853470	-2.04238	-1.03025	2.04238	down		Rep: NPL4-like protein 2 - Arabidopsis thaliana (Mouse-ear cress), partial (48%) [TC395348]
A_84_P808198	-2.28068	-1.18947	2.28068	down	MLP28	Arabidopsis thaliana MLP-like protein 28 (MLP28) mRNA, complete cds [NM_001124107]
A_84_P19195	-5.13598	-2.36064	5.13598	down	AT2G36570	Arabidopsis thaliana leucine-rich repeat protein kinase-like protein (AT2G36570) mRNA, complete cds [NM_129213]
A_84_P849804	-2.20748	-1.1424	2.20748	down	AT2G18210	Arabidopsis thaliana uncharacterized protein (AT2G18210) mRNA, complete cds [NM_127378]
A_84_P208128	-2.02742	-1.01964	2.02742	down		GB
A_84_P606233	-2.94338	-1.55747	2.94338	down	AT3G56260	Arabidopsis thaliana uncharacterized protein (AT3G56260) mRNA, complete cds [NM_115484]
A_84_P12766	-5.16146	-2.36778	5.16146	down	F3H	Arabidopsis thaliana Naringenin,2-oxoglutarate 3-dioxygenase (F3H) mRNA, complete cds [NM_114983]
A_84_P22569	-2.00913	-1.00657	2.00913	down	AT5G51770	Arabidopsis thaliana protein kinase family protein (AT5G51770) mRNA, complete cds [NM_124556]
A_84_P14886	-4.90768	-2.29504	4.90768	down	AT5G07150	Arabidopsis thaliana leucine-rich repeat protein kinase-like protein (AT5G07150) mRNA, complete cds [NM_120797]
A_84_P22916	-2.43237	-1.28236	2.43237	down	AT2G22190	Arabidopsis thaliana haloacid dehalogenase-like hydrolase domain-containing protein (AT2G22190) mRNA, complete cds [NM_127787]
A_84_P23879	-4.27598	-2.09625	4.27598	down	HSFB3	Arabidopsis thaliana heat stress transcription factor B-3 (HSFB3) mRNA, complete cds [NM_129732]
A_84_P16766	-2.29614	-1.19921	2.29614	down	AT5G03640	Arabidopsis thaliana protein kinase family protein (AT5G03640) mRNA, complete cds [NM_120445]
A_84_P552133	-3.77232	-1.91545	3.77232	down	AT5G10625	Arabidopsis thaliana uncharacterized protein (AT5G10625) mRNA, complete cds [NM_203034]
A_84_P820052	-2.44047	-1.28716	2.44047	down	EXPA5	Arabidopsis thaliana expansin A5 (EXPA5) mRNA, complete cds [NM_113824]
A_84_P64734	-2.59945	-1.37821	2.59945	down	ALC	Arabidopsis thaliana transcription factor ALC (ALC) mRNA, complete cds [NM_001085341]
A_84_P857350	-2.20282	-1.13935	2.20282	down	AT1G23130	Arabidopsis thaliana polyketide cyclase/dehydrase and lipid transport-like protein (AT1G23130) mRNA, complete cds [NM_102161]
A_84_P17099	-2.93128	-1.55153	2.93128	down	AT1G32740	Arabidopsis thaliana SBP (S-ribonuclease binding protein) family protein (AT1G32740) mRNA, complete cds [NM_103008]
A_84_P818374	-2.74135	-1.45488	2.74135	down	AT3G13150	Arabidopsis thaliana pentatricopeptide repeat-containing protein (AT3G13150) mRNA, complete cds [NM_112154]
A_84_P813414	-2.04529	-1.0323	2.04529	down
A_84_P757893	-2.69834	-1.43207	2.69834	down		Rep: Chromosome chr15 scaffold_37, whole genome shotgun sequence - Vitis vinifera (Grape), partial (15%) [TC396343]
A_84_P15814	-2.34251	-1.22805	2.34251	down	AT5G01850	Arabidopsis thaliana protein kinase family protein (AT5G01850) mRNA, complete cds [NM_120263]
A_84_P18680	-2.19051	-1.13126	2.19051	down	ASN3	Arabidopsis thaliana asparagine synthetase 3 (ASN3) mRNA, complete cds [NM_121062]
A_84_P15381	-2.18155	-1.12535	2.18155	down	EXPA4	Arabidopsis thaliana expansin A4 (EXPA4) mRNA, complete cds [NM_129526]
A_84_P815994	-8.52466	-3.09164	8.52466	down	AT1G54020	Arabidopsis thaliana GDSL esterase/lipase (AT1G54020) mRNA, complete cds [NM_104279]
A_84_P575291	-5.29714	-2.40521	5.29714	down	AT5G36740	Arabidopsis thaliana Acyl-CoA N-acyltransferase with RING/FYVE/PHD-type zinc finger domain (AT5G36740) mRNA, complete cds [NM_123034]
A_84_P833313	-2.10619	-1.07463	2.10619	down	WOX11	Arabidopsis thaliana WUSCHEL related homeobox 11 (WOX11) mRNA, complete cds [NM_001125091]
A_84_P10878	-2.03184	-1.02279	2.03184	down	AT3G51930	Arabidopsis thaliana transducin/WD40 domain-containing protein (AT3G51930) mRNA, complete cds [NM_115052]
A_84_P286710	-2.78271	-1.47649	2.78271	down	AT3G45160	Arabidopsis thaliana Putative membrane lipoprotein (AT3G45160) mRNA, complete cds [NM_114385]
A_84_P15609	-2.32046	-1.21441	2.32046	down
A_84_P511391	-2.9085	-1.54027	2.9085	down	AT5G17830	Arabidopsis thaliana Plasma-membrane choline transporter family protein (AT5G17830) mRNA, complete cds [NM_121789]
A_84_P854824	-2.42543	-1.27824	2.42543	down		Rep: Glycine-rich RNA-binding protein 7 - Arabidopsis thaliana (Mouse-ear cress), partial (36%) [TC396369]
A_84_P575490	-2.51734	-1.3319	2.51734	down	AT1G19394	Arabidopsis thaliana uncharacterized protein (AT1G19394) mRNA, complete cds [NM_202137]
A_84_P826226	-11.9218	-3.57552	11.9218	down	AT4G14200	Arabidopsis thaliana pentatricopeptide repeat-containing protein-like protein (AT4G14200) mRNA, complete cds [NM_117497]
A_84_P822050	-2.2278	-1.15562	2.2278	down	AT3G23080	Arabidopsis thaliana SRPBCC ligand-binding domain-containing protein (AT3G23080) mRNA, complete cds [NM_113208]
A_84_P766510	-3.8196	-1.93342	3.8196	down	AT5G57770	Arabidopsis thaliana uncharacterized protein (AT5G57770) mRNA, complete cds [NM_125160]
A_84_P20420	-18.6153	-4.21842	18.6153	down	AT4G11320	Arabidopsis thaliana putative cysteine proteinase (AT4G11320) mRNA, complete cds [NM_117203]
A_84_P11580	-2.14423	-1.10046	2.14423	down	AT2G47870	Arabidopsis thaliana putative glutaredoxin-C12 (AT2G47870) mRNA, complete cds [NM_130354]
A_84_P606525	-5.32111	-2.41173	5.32111	down	AT5G49370	Arabidopsis thaliana Pleckstrin homology (PH) domain-containing protein-like protein (AT5G49370) mRNA, complete cds [NM_124314]
A_84_P753163	-5.69347	-2.50931	5.69347	down	AT1G58245	Arabidopsis thaliana Plant thionin family protein (AT1G58245) mRNA, complete cds [NM_001084271]
A_84_P18685	-3.71223	-1.89229	3.71223	down	MYB3R-4	Arabidopsis thaliana myb domain protein 3r-4 (MYB3R-4) mRNA, complete cds [NM_121189]
A_84_P13843	-17.0073	-4.08808	17.0073	down	AT1G17300	Arabidopsis thaliana uncharacterized protein (AT1G17300) mRNA, complete cds [NM_101592]
A_84_P20449	-4.75797	-2.25035	4.75797	down	AT4G22490	Arabidopsis thaliana bifunctional inhibitor/lipid-transfer protein/seed storage 2S albumin-like protein (AT4G22490) mRNA, complete cds [NM_118375]
A_84_P767878	-8.34673	-3.06121	8.34673	down
A_84_P146708	-3.03047	-1.59954	3.03047	down	AT4G13100	Arabidopsis thaliana RING/U-box domain-containing protein (AT4G13100) mRNA, complete cds [NM_117379]
A_84_P139479	-7.63999	-2.93357	7.63999	down	AT5G55520	Arabidopsis thaliana uncharacterized protein (AT5G55520) mRNA, complete cds [NM_124934]
A_84_P808216	-12.3275	-3.62381	12.3275	down
A_84_P11710	-2.73952	-1.45392	2.73952	down	AT1G53080	Arabidopsis thaliana legume lectin-like protein (AT1G53080) mRNA, complete cds [NM_104187]
A_84_P818529	-8.84936	-3.14557	8.84936	down	TT7	Arabidopsis thaliana Flavonoid 3'-monooxygenase (TT7) mRNA, complete cds [NM_120881]
A_84_P18633	-2.02637	-1.0189	2.02637	down	HCD1	Arabidopsis thaliana 3-hydroxyacyl-CoA dehydratase 1 (HCD1) mRNA, complete cds [NM_117523]
A_84_P859300	-2.25587	-1.17369	2.25587	down	HSP90.1	Arabidopsis thaliana heat shock protein 81-1 (HSP90.1) mRNA, complete cds [NM_124642]
A_84_P22046	-8.64203	-3.11137	8.64203	down	TTG2	Arabidopsis thaliana WRKY transcription factor 44 (TTG2) mRNA, complete cds [NM_001084546]
A_84_P854931	-6.0282	-2.59173	6.0282	down
A_84_P19795	-3.0709	-1.61866	3.0709	down	AT5G14980	Arabidopsis thaliana esterase/lipase/thioesterase family protein (AT5G14980) mRNA, complete cds [NM_121502]
A_84_P857416	-8.3612	-3.06371	8.3612	down
A_84_P155285	-2.5434	-1.34676	2.5434	down	iqd17	Arabidopsis thaliana protein IQ-domain 17 (iqd17) mRNA, complete cds [NM_116308]
A_84_P16314	-2.03255	-1.02329	2.03255	down	AT2G22590	Arabidopsis thaliana UDP-glycosyltransferase-like protein (AT2G22590) mRNA, complete cds [NM_127824]
A_84_P10935	-10.6777	-3.41653	10.6777	down	AT4G01380	Arabidopsis thaliana plastocyanin-like domain-containing protein (AT4G01380) mRNA, complete cds [NM_116368]
A_84_P768803	-2.72094	-1.4441	2.72094	down	XYL4	Arabidopsis thaliana Full-length cDNA Complete sequence from clone GSLTFB8ZD08 of Flowers and buds of strain col-0 of Arabidopsis thaliana (thale cress) [BX827044]
A_84_P591196	-7.10926	-2.8297	7.10926	down	AT4G22560	Arabidopsis thaliana uncharacterized protein (AT4G22560) mRNA, complete cds [NM_118382]
A_84_P21386	-12.0974	-3.59663	12.0974	down	AT4G20230	Arabidopsis thaliana terpene cyclase, C1 domain-containing protein (AT4G20230) mRNA, complete cds [NM_118142]
A_84_P834891	-2.68604	-1.42548	2.68604	down	MPK19	Arabidopsis thaliana mitogen-activated protein kinase 19 (MPK19) mRNA, complete cds [NM_112333]
A_84_P537020	-2.19339	-1.13316	2.19339	down	AT4G28340	Arabidopsis thaliana uncharacterized protein (AT4G28340) mRNA, complete cds [NM_118974]
A_84_P11484	-3.52833	-1.81899	3.52833	down	AT1G63840	Arabidopsis thaliana RING/U-box domain-containing protein (AT1G63840) mRNA, complete cds [NM_105059]
A_84_P817749	-2.01685	-1.0121	2.01685	down	MYB3	Arabidopsis thaliana transcription factor MYB3 (MYB3) mRNA, complete cds [NM_102111]
A_84_P23872	-3.65313	-1.86913	3.65313	down	AT2G16750	Arabidopsis thaliana adenine nucleotide alpha hydrolases-domain containing protein kinase (AT2G16750) mRNA, complete cds [NM_127227]
A_84_P854829	-2.49371	-1.31829	2.49371	down
A_84_P787973	-2.62279	-1.3911	2.62279	down	AT2G43445	Arabidopsis thaliana F-box/kelch-repeat protein (AT2G43445) mRNA, complete cds [NM_001084580]
A_84_P800021	-2.04887	-1.03483	2.04887	down	AT2G22660	Arabidopsis thaliana uncharacterized protein (AT2G22660) mRNA, complete cds [NM_127831]
A_84_P10333	-2.77889	-1.47451	2.77889	down	NAC105	Arabidopsis thaliana NAC domain containing protein 105 (NAC105) mRNA, complete cds [NM_126028]
A_84_P869521	-2.32393	-1.21657	2.32393	down	DGD2	Arabidopsis thaliana digalactosyldiacylglycerol synthase 2 (DGD2) mRNA, complete cds [NM_116279]
A_84_P860582	-2.43691	-1.28505	2.43691	down	ABF3	Arabidopsis thaliana abscisic acid-insensitive 5-like protein 6 (ABF3) mRNA, complete cds [NM_001036708]
A_84_P846194	-2.4192	-1.27453	2.4192	down	LNG1	Arabidopsis thaliana protein longifolia1 (LNG1) mRNA, complete cds [NM_121562]
A_84_P707180	-4.59039	-2.19862	4.59039	down	AT5G01210	Arabidopsis thaliana Full-length cDNA Complete sequence from clone GSLTLS71ZC09 of Adult vegetative tissue of strain col-0 of Arabidopsis thaliana (thale cress) [BX820075]
A_84_P22105	-2.48111	-1.31099	2.48111	down	AT3G04030	Arabidopsis thaliana myb family transcription factor (AT3G04030) mRNA, complete cds [NM_001125095]
A_84_P811915	-2.09484	-1.06684	2.09484	down	RAB18	Arabidopsis thaliana dehydrin Rab18 (RAB18) mRNA, complete cds [NM_126038]
A_84_P21393	-7.65188	-2.93581	7.65188	down	AT1G27030	Arabidopsis thaliana uncharacterized protein (AT1G27030) mRNA, complete cds [NM_102465]
A_84_P838948	-3.51391	-1.81308	3.51391	down	AT1G01520	Arabidopsis thaliana myb family transcription factor (AT1G01520) mRNA, complete cds [NM_100034]
A_84_P797546	-4.59111	-2.19884	4.59111	down		AYAZI58TR pooled cDNA populations Arabidopsis thaliana cDNA, mRNA sequence [EG456960]
A_84_P840677	-2.1944	-1.13383	2.1944	down		GB
A_84_P17635	-2.22453	-1.1535	2.22453	down	LEC1	Arabidopsis thaliana leafy cotyledon 1 transcription factor (LEC1) mRNA, complete cds [NM_102046]
A_84_P21684	-2.08075	-1.05711	2.08075	down	AT5G67200	Arabidopsis thaliana putative inactive receptor kinase (AT5G67200) mRNA, complete cds [NM_126120]
A_84_P16077	-2.47796	-1.30916	2.47796	down	MAPKKK18	Arabidopsis thaliana mitogen-activated protein kinase kinase kinase 18 (MAPKKK18) mRNA, complete cds [NM_100389]
A_84_P810355	-3.73213	-1.9	3.73213	down	PBP1	Arabidopsis thaliana PYK10-binding protein 1 (PBP1) mRNA, complete cds [NM_001035633]
A_84_P21322	-3.09414	-1.62954	3.09414	down	AT3G61990	Arabidopsis thaliana S-adenosyl-L-methionine-dependent methyltransferase-like protein (AT3G61990) mRNA, complete cds [NM_116064]
A_84_P17212	-6.98117	-2.80347	6.98117	down	CAL	Arabidopsis thaliana transcription factor CAULIFLOWER (CAL) mRNA, complete cds [NM_102395]
A_84_P830076	-2.16207	-1.11242	2.16207	down	AT3G07660	Arabidopsis thaliana uncharacterized protein (AT3G07660) mRNA, complete cds [NM_111645]
A_84_P12525	-5.01529	-2.32633	5.01529	down	AT2G47880	Arabidopsis thaliana glutaredoxin-C13 (AT2G47880) mRNA, complete cds [NM_130355]
A_84_P12814	-2.31749	-1.21256	2.31749	down	ATERDJ3B	Arabidopsis thaliana DNAJ heat shock family protein (ATERDJ3B) mRNA, complete cds [NM_116125]
A_84_P787734	-12.1761	-3.60598	12.1761	down	CPL3	17995 Lambda-PRL2 Arabidopsis thaliana cDNA clone 199J22T7, mRNA sequence [H76290]
A_84_P19467	-2.1634	-1.1133	2.1634	down	CINV2	Arabidopsis thaliana cytosolic invertase 2 (CINV2) mRNA, complete cds [NM_202796]
A_84_P858400	-2.28772	-1.19391	2.28772	down	AT1G76790	Arabidopsis thaliana O-methyltransferase-like protein (AT1G76790) mRNA, complete cds [NM_106329]
A_84_P807030	-26.0843	-4.70511	26.0843	down
A_84_P765054	-11.2362	-3.49009	11.2362	down		Arabidopsis thaliana Full-length cDNA Complete sequence from clone GSLTSIL36ZH07 of Silique of strain col-0 of Arabidopsis thaliana (thale cress) [BX828761]
A_84_P840133	-20.008	-4.32251	20.008	down		GB
A_84_P205068	-2.35944	-1.23844	2.35944	down	AT1G17744	Arabidopsis thaliana uncharacterized protein (AT1G17744) mRNA, complete cds [NM_001123830]
A_84_P11328	-2.29591	-1.19906	2.29591	down	AT1G20470	Arabidopsis thaliana SAUR-like auxin-responsive protein (AT1G20470) mRNA, complete cds [NM_101897]
A_84_P789317	-5.56394	-2.47611	5.56394	down		AC04F02 AC Arabidopsis thaliana cDNA 5', mRNA sequence [BE039502]
A_84_P721757	-3.17619	-1.6673	3.17619	down	AT5G61412	Arabidopsis thaliana uncharacterized protein (AT5G61412) mRNA, complete cds [NM_001126000]
A_84_P22308	-2.31661	-1.21202	2.31661	down	AT4G10390	Arabidopsis thaliana protein kinase family protein (AT4G10390) mRNA, complete cds [NM_117107]
A_84_P546356	-6.74275	-2.75334	6.74275	down	AT1G76610	Arabidopsis thaliana uncharacterized protein (AT1G76610) mRNA, complete cds [NM_106311]
A_84_P14208	-10.6	-3.40599	10.6	down	AT1G03670	Arabidopsis thaliana ankyrin repeats-containing protein (AT1G03670) mRNA, complete cds [NM_100246]
A_84_P24047	-8.35278	-3.06226	8.35278	down	AT3G21950	Arabidopsis thaliana methyltransferase (AT3G21950) mRNA, complete cds [NM_113091]
A_84_P10684	-3.11065	-1.63722	3.11065	down	SCPL9	Arabidopsis thaliana serine carboxypeptidase-like 9 (SCPL9) mRNA, complete cds [NM_127866]
A_84_P15410	-2.26822	-1.18156	2.26822	down	PDR6	Arabidopsis thaliana ABC transporter G family member 34 (PDR6) mRNA, complete cds [NM_129195]
A_84_P23903	-2.08159	-1.05769	2.08159	down	AT2G02780	Arabidopsis thaliana leucine-rich repeat protein kinase-like protein (AT2G02780) mRNA, complete cds [NM_126333]
A_84_P590571	-4.97666	-2.31518	4.97666	down	AT1G04500	Arabidopsis thaliana CCT motif-containing protein (AT1G04500) mRNA, complete cds [NM_100329]
A_84_P856227	-2.18079	-1.12485	2.18079	down		Rep: Alpha-expansin precursor - Gossypium hirsutum (Upland cotton) (Gossypium mexicanum), partial (42%) [TC397147]
A_84_P758666	-2.00112	-1.00081	2.00112	down
A_84_P848389	-2.19567	-1.13466	2.19567	down	APX1	Arabidopsis thaliana L-ascorbate peroxidase (APX1) mRNA, complete cds [NM_001084013]
A_84_P10523	-3.2316	-1.69225	3.2316	down	AT1G34040	Arabidopsis thaliana Pyridoxal phosphate -dependent transferase-like protein (AT1G34040) mRNA, complete cds [NM_103126]
A_84_P819307	-7.6668	-2.93863	7.6668	down	AT2G43590	Arabidopsis thaliana chitinase-like protein (AT2G43590) mRNA, complete cds [NM_129921]
A_84_P12668	-3.01259	-1.591	3.01259	down	AT3G22790	Arabidopsis thaliana kinase interacting KIP1-like protein (AT3G22790) mRNA, complete cds [NM_113178]
A_84_P21225	-2.37542	-1.24818	2.37542	down	AT3G24090	Arabidopsis thaliana putative glucosamine-fructose-6-phosphate aminotransferase (AT3G24090) mRNA, complete cds [NM_113314]
A_84_P11893	-2.53753	-1.34342	2.53753	down	MSRB6	Arabidopsis thaliana peptide methionine sulfoxide reductase B6 (MSRB6) mRNA, complete cds [NM_116722]
A_84_P507242	-2.627	-1.39342	2.627	down	TLL1	Arabidopsis thaliana triacylglycerol lipase-like 1 protein (TLL1) mRNA, complete cds [NM_179441]
A_84_P11141	-2.47533	-1.30762	2.47533	down	AT5G19090	Arabidopsis thaliana heavy metal transport/detoxification domain-containing protein (AT5G19090) mRNA, complete cds [NM_121914]
A_84_P118932	-3.2305	-1.69176	3.2305	down	HSFB4	Arabidopsis thaliana heat stress transcription factor B-4 (HSFB4) mRNA, complete cds [NM_103602]
A_84_P52990	-3.48137	-1.79966	3.48137	down	GLN1;4	Arabidopsis thaliana glutamine synthetase cytosolic isozyme 1-4 (GLN1;4) mRNA, complete cds [NM_121663]
A_84_P309483	-2.76102	-1.4652	2.76102	down	AT4G24420	Arabidopsis thaliana RNA recognition motif-containing protein (AT4G24420) mRNA, complete cds [NM_118575]
A_84_P12705	-2.66201	-1.41252	2.66201	down	CYP705A18	Arabidopsis thaliana cytochrome P450, family 705, subfamily A, polypeptide 18 (CYP705A18) mRNA, complete cds [NM_112900]
A_84_P20322	-3.91253	-1.9681	3.91253	down	AT3G49340	Arabidopsis thaliana putative cysteine proteinase (AT3G49340) mRNA, complete cds [NM_114794]
A_84_P19985	-2.64604	-1.40383	2.64604	down	SERK1	Arabidopsis thaliana somatic embryogenesis receptor kinase 1 (SERK1) mRNA, complete cds [NM_105841]
A_84_P767219	-3.24132	-1.69658	3.24132	down	AT5G65140	Arabidopsis thaliana haloacid dehalogenase-like hydrolase domain-containing protein (AT5G65140) mRNA, complete cds [NM_001126029]
A_84_P10747	-4.01119	-2.00403	4.01119	down	WAG1	Arabidopsis thaliana protein WAG1 (WAG1) mRNA, complete cds [NM_104248]
A_84_P832490	-4.67297	-2.22434	4.67297	down	AT3G60310	Arabidopsis thaliana uncharacterized protein (AT3G60310) mRNA, complete cds [NM_115895]
A_84_P13763	-3.11046	-1.63713	3.11046	down	CKX6	Arabidopsis thaliana cytokinin oxidase/dehydrogenase 6 (CKX6) mRNA, complete cds [NM_116209]
A_84_P16690	-2.56064	-1.35651	2.56064	down	CRF4	Arabidopsis thaliana ethylene-responsive transcription factor CRF4 (CRF4) mRNA, complete cds [NM_118933]
A_84_P831427	-5.24206	-2.39013	5.24206	down	AT5G66310	Arabidopsis thaliana ATP binding microtubule motor family protein (AT5G66310) mRNA, complete cds [NM_126029]
A_84_P787715	-3.74984	-1.90683	3.74984	down	AT1G78170	Arabidopsis thaliana uncharacterized protein (AT1G78170) mRNA, complete cds [NM_106467]
A_84_P849229	-2.49996	-1.32191	2.49996	down	AT5G50150	Arabidopsis thaliana uncharacterized protein (AT5G50150) mRNA, complete cds [NM_124394]
A_84_P861697	-5.22242	-2.38472	5.22242	down		Rep: Ribosomal protein L11 precursor - Arabidopsis thaliana (Mouse-ear cress), partial (23%) [TC401862]
A_84_P10470	-4.68563	-2.22824	4.68563	down	RAB28	Arabidopsis thaliana responsive to abscisic acid 28 (RAB28) mRNA, complete cds [NM_100194]
A_84_P17265	-2.26944	-1.18234	2.26944	down	AT2G20340	Arabidopsis thaliana Tyrosine decarboxylase 1 (AT2G20340) mRNA, complete cds [NM_179668]
A_84_P255150	-6.65494	-2.73442	6.65494	down	AT2G28410	Arabidopsis thaliana uncharacterized protein (AT2G28410) mRNA, complete cds [NM_128401]
A_84_P762150	-6.01762	-2.58919	6.01762	down	AT3G63233	Arabidopsis thaliana uncharacterized protein (AT3G63233) mRNA, complete cds [NM_001125426]
A_84_P752347	-3.54122	-1.82425	3.54122	down
A_84_P545022	-4.46924	-2.16003	4.46924	down	AT4G35165	Arabidopsis thaliana uncharacterized protein (AT4G35165) mRNA, complete cds [NM_148398]
A_84_P576433	-9.57594	-3.25941	9.57594	down	AT1G35880	Arabidopsis thaliana uncharacterized protein (AT1G35880) mRNA, complete cds [NM_103286]
A_84_P554830	-4.36953	-2.12748	4.36953	down	AT5G20635	Arabidopsis thaliana uncharacterized protein (AT5G20635) mRNA, complete cds [NM_147870]
A_84_P212568	-2.50289	-1.3236	2.50289	down	AT2G22900	Arabidopsis thaliana putative glycosyltransferase 7 (AT2G22900) mRNA, complete cds [NM_127855]
A_84_P853023	-2.00156	-1.00113	2.00156	down
A_84_P16316	-2.25308	-1.1719	2.25308	down	CYP96A1	Arabidopsis thaliana cytochrome P450, family 96, subfamily A, polypeptide 1 (CYP96A1) mRNA, complete cds [NM_127882]
A_84_P759481	-2.10488	-1.07374	2.10488	down	FLR1	Arabidopsis thaliana polygalacturonase inhibitory protein-like protein (FLR1) mRNA, complete cds [NM_202562]
A_84_P753742	-3.77312	-1.91576	3.77312	down	AT1G04778	Arabidopsis thaliana uncharacterized protein (AT1G04778) mRNA, complete cds [NM_001083989]
A_84_P10979	-2.29941	-1.20126	2.29941	down	IRX1	Arabidopsis thaliana cellulose synthase A catalytic subunit 8 [UDP-forming] (IRX1) mRNA, complete cds [NM_117994]
A_84_P177964	-4.07459	-2.02666	4.07459	down	AT2G15440	Arabidopsis thaliana uncharacterized protein (AT2G15440) mRNA, complete cds [NM_127104]
A_84_P105636	-3.29175	-1.71886	3.29175	down	NSP1	Arabidopsis thaliana Nitrile-specifier protein 1 (NSP1) mRNA, complete cds [NM_112511]
A_84_P741115	-2.01388	-1.00998	2.01388	down		Rep: nicotinate phosphoribosyltransferase - Arabidopsis thaliana, complete [TC363592]
A_84_P16236	-2.16318	-1.11315	2.16318	down	PDCB3	Arabidopsis thaliana plasmodesmata callose-binding protein 3 (PDCB3) mRNA, complete cds [NM_101723]
A_84_P586971	-4.3718	-2.12823	4.3718	down	AT5G59050	Arabidopsis thaliana uncharacterized protein (AT5G59050) mRNA, complete cds [NM_203234]
A_84_P770100	-2.08781	-1.06199	2.08781	down
A_84_P22017	-4.02105	-2.00757	4.02105	down	AT2G28790	Arabidopsis thaliana pathogenesis-related thaumatin-like protein (AT2G28790) mRNA, complete cds [NM_128438]
A_84_P845171	-6.74885	-2.75464	6.74885	down	DFR	32O9 Arabidopsis Leaf Senescence Library Arabidopsis thaliana cDNA 3', mRNA sequence [CD533642]
A_84_P861193	-3.18336	-1.67055	3.18336	down	AT1G06000	Arabidopsis thaliana UDP-glycosyltransferase-like protein (AT1G06000) mRNA, complete cds [NM_100480]
A_84_P23900	-7.55128	-2.91672	7.55128	down	AT2G29370	Arabidopsis thaliana tropine dehydrogenase (AT2G29370) mRNA, complete cds [NM_179801]
A_84_P285710	-2.02533	-1.01816	2.02533	down	AT3G11210	Arabidopsis thaliana GDSL esterase/lipase CPRD49 (AT3G11210) mRNA, complete cds [NM_111956]
A_84_P220058	-2.62994	-1.39503	2.62994	down	AT3G12920	Arabidopsis thaliana S-ribonuclease binding protein (AT3G12920) mRNA, complete cds [NM_112128]
A_84_P768685	-3.26856	-1.70865	3.26856	down
A_84_P841491	-2.20652	-1.14177	2.20652	down		GB
A_84_P862920	-4.81212	-2.26667	4.81212	down
A_84_P18683	-4.03851	-2.01382	4.03851	down	AT5G10970	Arabidopsis thaliana C2H2 and C2HC zinc finger-containing protein (AT5G10970) mRNA, complete cds [NM_121135]
A_84_P106882	-3.24145	-1.69664	3.24145	down	AT1G78170	Arabidopsis thaliana uncharacterized protein (AT1G78170) mRNA, complete cds [NM_106467]
A_84_P113912	-4.62988	-2.21098	4.62988	down	AT4G00670	Arabidopsis thaliana Remorin family protein (AT4G00670) mRNA, complete cds [NM_116292]
A_84_P16780	-2.85714	-1.51457	2.85714	down	PEI1	Arabidopsis thaliana zinc finger CCCH domain-containing protein 54 (PEI1) mRNA, complete cds [NM_120832]
A_84_P596218	-13.833	-3.79005	13.833	down	AT2G25130	Arabidopsis thaliana armadillo/beta-catenin-like repeats-containing protein (AT2G25130) mRNA, complete cds [NM_128070]
A_84_P295834	-4.97687	-2.31524	4.97687	down		Arabidopsis thaliana At5g40942 mRNA, complete cds [BT029524]
A_84_P13584	-2.14489	-1.1009	2.14489	down	AT3G01930	Arabidopsis thaliana major facilitator protein (AT3G01930) mRNA, complete cds [NM_111059]
A_84_P807693	-2.5502	-1.35061	2.5502	down	SAM-2	Arabidopsis thaliana S-adenosylmethionine synthase 2 (SAM-2) mRNA, complete cds [NM_001084876]
A_84_P195544	-3.08861	-1.62696	3.08861	down	AT4G02800	Arabidopsis thaliana uncharacterized protein (AT4G02800) mRNA, complete cds [NM_116514]
A_84_P829220	-3.51013	-1.81152	3.51013	down	FKD1	Arabidopsis thaliana protein forked1 (FKD1) mRNA, complete cds [NM_202756]
A_84_P841077	-2.41554	-1.27234	2.41554	down	AT1G22160	Arabidopsis thaliana uncharacterized protein (AT1G22160) mRNA, complete cds [NM_102066]
A_84_P603421	-3.02789	-1.59831	3.02789	down	AT3G01960	Arabidopsis thaliana uncharacterized protein (AT3G01960) mRNA, complete cds [NM_111062]
A_84_P13577	-2.01798	-1.01291	2.01798	down	AT1G36940	Arabidopsis thaliana uncharacterized protein (AT1G36940) mRNA, complete cds [NM_001198217]
A_84_P758568	-2.64447	-1.40298	2.64447	down
A_84_P15213	-2.02609	-1.0187	2.02609	down	AT1G47670	Arabidopsis thaliana Lysine histidine transporter-like 8 (AT1G47670) mRNA, complete cds [NM_103660]
A_84_P834894	-5.93052	-2.56816	5.93052	down	HB21	Arabidopsis thaliana homeobox-leucine zipper protein ATHB-21 (HB21) mRNA, complete cds [NM_127411]
A_84_P854044	-6.97019	-2.8012	6.97019	down	AT4G14200	Arabidopsis thaliana pentatricopeptide repeat-containing protein-like protein (AT4G14200) mRNA, complete cds [NM_117497]
A_84_P834629	-2.35078	-1.23314	2.35078	down	AT1G62370	Arabidopsis thaliana RING/U-box domain-containing protein (AT1G62370) mRNA, complete cds [NM_104917]
A_84_P177804	-3.51321	-1.81279	3.51321	down	AT3G54460	Arabidopsis thaliana F-box protein (AT3G54460) mRNA, complete cds [NM_148874]
A_84_P855752	-2.89074	-1.53144	2.89074	down		Rep: Soluble inorganic pyrophosphatase 2 - Arabidopsis thaliana (Mouse-ear cress), partial (25%) [TC396818]
A_84_P22270	-2.14369	-1.1001	2.14369	down	AT3G62510	Arabidopsis thaliana protein disulfide isomerase-like protein (AT3G62510) mRNA, complete cds [NM_116116]
A_84_P11591	-2.86637	-1.51923	2.86637	down	DEAR3	Arabidopsis thaliana ethylene-responsive transcription factor ERF008 (DEAR3) mRNA, complete cds [NM_127898]
A_84_P23173	-3.53811	-1.82298	3.53811	down	RLP14	Arabidopsis thaliana receptor like protein 14 (RLP14) mRNA, complete cds [NM_106078]
A_84_P14267	-3.42293	-1.77523	3.42293	down	SWI3C	Arabidopsis thaliana SWI/SNF complex subunit SWI3C (SWI3C) mRNA, complete cds [NM_102019]
A_84_P76314	-2.05045	-1.03594	2.05045	down	IQD3	Arabidopsis thaliana protein IQ-domain 3 (IQD3) mRNA, complete cds [NM_115089]
A_84_P812559	-2.38415	-1.25348	2.38415	down
A_84_P109182	-2.53566	-1.34236	2.53566	down	AT1G58400	Arabidopsis thaliana CC-NBS-LRR class disease resistance protein (AT1G58400) mRNA, complete cds [NM_104620]
A_84_P577286	-2.36625	-1.2426	2.36625	down	AT1G22230	Arabidopsis thaliana uncharacterized protein (AT1G22230) mRNA, complete cds [NM_102073]
A_84_P549629	-2.18777	-1.12946	2.18777	down	PHOT2	Arabidopsis thaliana phototropin 2 (PHOT2) mRNA, complete cds [NM_125199]
A_84_P595278	-2.76255	-1.466	2.76255	down	AT2G04170	Arabidopsis thaliana TRAF-like family protein (AT2G04170) mRNA, complete cds [NM_001124792]
A_84_P251255	-2.42844	-1.28003	2.42844	down	MRH1	Arabidopsis thaliana putative LRR receptor-like serine/threonine-protein kinase MRH1 (MRH1) mRNA, complete cds [NM_117980]
A_84_P15536	-6.25719	-2.64552	6.25719	down	JR1	Arabidopsis thaliana myrosinase-binding-like protein (JR1) mRNA, complete cds [NM_001035635]
A_84_P861062	-4.35297	-2.122	4.35297	down	AT3G11930	Arabidopsis thaliana adenine nucleotide alpha hydrolases-like protein (AT3G11930) mRNA, complete cds [NM_112026]
A_84_P14681	-5.04293	-2.33426	5.04293	down	AT3G56550	Arabidopsis thaliana pentatricopeptide repeat-containing protein (AT3G56550) mRNA, complete cds [NM_115513]
A_84_P526317	-3.1355	-1.64869	3.1355	down	AT4G15960	Arabidopsis thaliana epoxide hydrolase-related protein (AT4G15960) mRNA, complete cds [NM_117688]
A_84_P22567	-3.88117	-1.95649	3.88117	down	AT5G51270	Arabidopsis thaliana U-box domain-containing protein 53 (AT5G51270) mRNA, complete cds [NM_124506]
A_84_P15370	-3.29608	-1.72075	3.29608	down	PDIL2-2	Arabidopsis thaliana protein disulfide-isomerase A6 (PDIL2-2) mRNA, complete cds [NM_100376]
A_84_P11788	-2.00449	-1.00324	2.00449	down	PGA4	Arabidopsis thaliana polygalacturonase 4 (PGA4) mRNA, complete cds [NM_100158]
A_84_P244005	-2.43631	-1.2847	2.43631	down	AT3G24760	Arabidopsis thaliana F-box/kelch-repeat protein (AT3G24760) mRNA, complete cds [NM_113388]
A_84_P20558	-2.61618	-1.38746	2.61618	down	AT5G06250	Arabidopsis thaliana AP2/B3 domain-containing protein (AT5G06250) mRNA, complete cds [NM_001125705]
A_84_P712221	-2.72036	-1.4438	2.72036	down	AT1G72860	Arabidopsis thaliana Full-length cDNA Complete sequence from clone GSLTPGH9ZC06 of Hormone Treated Callus of strain col-0 of Arabidopsis thaliana (thale cress) [BX817259]
A_84_P830871	-2.05139	-1.0366	2.05139	down	AT5G03830	Arabidopsis thaliana CDK inhibitor P21 binding protein (AT5G03830) mRNA, complete cds [NM_120464]
A_84_P612086	-2.25373	-1.17232	2.25373	down	AT1G51355	Arabidopsis thaliana uncharacterized protein (AT1G51355) mRNA, complete cds [NM_148576]
A_84_P532829	-3.23352	-1.69311	3.23352	down	AT1G02710	Arabidopsis thaliana glycine-rich protein (AT1G02710) mRNA, complete cds [NM_100151]
A_84_P526469	-3.39845	-1.76488	3.39845	down	AT5G22150	Arabidopsis thaliana uncharacterized protein (AT5G22150) mRNA, complete cds [NM_147896]
A_84_P276600	-2.89698	-1.53455	2.89698	down	AT1G52910	Arabidopsis thaliana uncharacterized protein (AT1G52910) mRNA, complete cds [NM_104169]
A_84_P590512	-3.19084	-1.67394	3.19084	down	GRF7	Arabidopsis thaliana growth-regulating factor 7 (GRF7) mRNA, complete cds [NM_124745]
A_84_P19409	-7.52191	-2.9111	7.52191	down	MLP423	Arabidopsis thaliana MLP-like protein 423 (MLP423) mRNA, complete cds [NM_102249]
A_84_P18174	-2.20698	-1.14207	2.20698	down	HMA5	Arabidopsis thaliana Cu2+-exporting ATPase (HMA5) mRNA, complete cds [NM_105023]
A_84_P563782	-2.21422	-1.1468	2.21422	down	SGP1	Arabidopsis thaliana Ras-related small GTP-binding family protein (SGP1) mRNA, complete cds [NM_203204]
A_84_P788781	-5.15572	-2.36617	5.15572	down	BIP3	Arabidopsis thaliana Hsp70 protein BiP chaperone BIP-L (BIP3) mRNA, complete cds [NM_100779]
A_84_P15351	-2.35323	-1.23464	2.35323	down	AT2G28670	Arabidopsis thaliana Disease resistance-responsive (dirigent-like protein) family protein (AT2G28670) mRNA, complete cds [NM_001161067]
A_84_P849563	-6.99875	-2.8071	6.99875	down	GH9C2	Arabidopsis thaliana endoglucanase 6 (GH9C2) mRNA, complete cds [NM_105114]
A_84_P13171	-3.28961	-1.71792	3.28961	down	AT5G66770	Arabidopsis thaliana scarecrow-like protein 4 (AT5G66770) mRNA, complete cds [NM_126075]
A_84_P855873	-2.65895	-1.41086	2.65895	down
A_84_P18528	-12.2879	-3.61916	12.2879	down	AT4G11290	Arabidopsis thaliana peroxidase 39 (AT4G11290) mRNA, complete cds [NM_117200]
A_84_P247205	-2.66848	-1.41602	2.66848	down	AT5G57670	Arabidopsis thaliana protein kinase-like protein (AT5G57670) mRNA, complete cds [NM_001085293]
A_84_P17520	-46.3617	-5.53486	46.3617	down	CSLA10	Arabidopsis thaliana putative mannan synthase 10 (CSLA10) mRNA, complete cds [NM_102254]
A_84_P12751	-2.04535	-1.03235	2.04535	down	MYB94	Arabidopsis thaliana myb domain protein 94 (MYB94) mRNA, complete cds [NM_114628]
A_84_P21869	-2.32397	-1.21659	2.32397	down	LAX3	Arabidopsis thaliana auxin transporter-like protein 3 (LAX3) mRNA, complete cds [NM_106418]
A_84_P19115	-7.99528	-2.99915	7.99528	down	AT2G43590	Arabidopsis thaliana chitinase-like protein (AT2G43590) mRNA, complete cds [NM_129921]
A_84_P522009	-2.1983	-1.13639	2.1983	down	AT5G06200	Arabidopsis thaliana uncharacterized protein (AT5G06200) mRNA, complete cds [NM_120702]
A_84_P23496	-2.24299	-1.16543	2.24299	down	AT5G46640	Arabidopsis thaliana AT hook motif DNA-binding family protein (AT5G46640) mRNA, complete cds [NM_124034]
A_84_P10056	-2.18293	-1.12627	2.18293	down	PWD	Arabidopsis thaliana phosphoglucan, water dikinase (PWD) mRNA, complete cds [NM_118578]
A_84_P756171	-2.46042	-1.2989	2.46042	down
A_84_P21478	-6.16336	-2.62372	6.16336	down	AT4G16640	Arabidopsis thaliana matrix metalloprotease domain-containing protein (AT4G16640) mRNA, complete cds [NM_117765]
A_84_P11494	-3.50805	-1.81067	3.50805	down	AT1G67870	Arabidopsis thaliana glycine-rich protein (AT1G67870) mRNA, complete cds [NM_105457]
A_84_P18619	-5.2108	-2.38151	5.2108	down	CYP81F4	Arabidopsis thaliana cytochrome P450, family 81, subfamily F, polypeptide 4 (CYP81F4) mRNA, complete cds [NM_119904]
A_84_P16667	-2.41291	-1.27077	2.41291	down	AT4G22940	Arabidopsis thaliana protein kinase family protein (AT4G22940) mRNA, complete cds [NM_118423]
A_84_P848781	-2.94583	-1.55868	2.94583	down	FUT13	Arabidopsis thaliana alpha-(1,4)-fucosyltransferase (FUT13) mRNA, complete cds [NM_105857]
A_84_P10739	-2.06813	-1.04833	2.06813	down	HB-1	Arabidopsis thaliana homeobox-leucine zipper protein HAT5 (HB-1) mRNA, complete cds [NM_111013]
A_84_P799279	-2.0729	-1.05165	2.0729	down	PCC1	Arabidopsis thaliana pathogen and circadian controlled 1 (PCC1) mRNA, complete cds [NM_113121]
A_84_P186914	-2.10699	-1.07518	2.10699	down	BSMT1	Arabidopsis thaliana S-adenosyl-L-methionine-dependent methyltransferase-like protein (BSMT1) mRNA, complete cds [NM_111981]
A_84_P851538	-26.5	-4.72792	26.5	down	THI2.1	Arabidopsis thaliana thionin 2.1 (THI2.1) mRNA, complete cds [NM_105885]
A_84_P17722	-2.2544	-1.17274	2.2544	down	AT5G06800	Arabidopsis thaliana myb-like HTH transcriptional regulator family protein (AT5G06800) mRNA, complete cds [NM_120763]
A_84_P19109	-4.86762	-2.28322	4.86762	down	AT1G44160	Arabidopsis thaliana HSP40/DnaJ peptide-binding protein (AT1G44160) mRNA, complete cds [NM_103540]
A_84_P570378	-11.5308	-3.52742	11.5308	down	AT2G28690	Arabidopsis thaliana uncharacterized protein (AT2G28690) mRNA, complete cds [NM_128430]
A_84_P13158	-2.12766	-1.08927	2.12766	down	SNRK2.5	Arabidopsis thaliana serine/threonine-protein kinase SRK2H (SNRK2.5) mRNA, complete cds [NM_125760]
A_84_P203168	-2.53902	-1.34427	2.53902	down	AT5G35660	Arabidopsis thaliana glycine-rich protein (AT5G35660) mRNA, complete cds [NM_001161277]
A_84_P11738	-3.22165	-1.6878	3.22165	down	NIK2	Arabidopsis thaliana NSP-interacting kinase 2 (NIK2) mRNA, complete cds [NM_001203042]
A_84_P15320	-2.19747	-1.13584	2.19747	down	VIM5	Arabidopsis thaliana E3 ubiquitin-protein ligase ORTHRUS 3 (VIM5) mRNA, complete cds [NM_104575]
A_84_P844482	-2.56453	-1.35869	2.56453	down	ACD6	Arabidopsis thaliana ankyrin repeat-containing protein (ACD6) mRNA, complete cds [NM_117519]
A_84_P156385	-5.14256	-2.36249	5.14256	down	AT5G66230	Arabidopsis thaliana Chalcone-flavanone isomerase family protein (AT5G66230) mRNA, complete cds [NM_001203703]
A_84_P267550	-2.41878	-1.27428	2.41878	down	AT2G28870	Arabidopsis thaliana uncharacterized protein (AT2G28870) mRNA, complete cds [NM_128446]
A_84_P850935	-2.82177	-1.4966	2.82177	down
A_84_P71834	-2.3251	-1.21729	2.3251	down	AT5G58930	Arabidopsis thaliana uncharacterized protein (AT5G58930) mRNA, complete cds [NM_125283]
A_84_P253555	-37.639	-5.23416	37.639	down	AT4G14090	Arabidopsis thaliana anthocyanin 5-O-glucosyltransferase (AT4G14090) mRNA, complete cds [NM_117485]
A_84_P135345	-2.61949	-1.38928	2.61949	down	UTR1	Arabidopsis thaliana UDP-galactose transporter 1 (UTR1) mRNA, complete cds [NM_126336]
A_84_P11706	-2.01294	-1.00931	2.01294	down	AT3G05830	Arabidopsis thaliana uncharacterized protein (AT3G05830) mRNA, complete cds [NM_001202889]
A_84_P12885	-9.26829	-3.2123	9.26829	down	LDOX	Arabidopsis thaliana leucoanthocyanidin dioxygenase (LDOX) mRNA, complete cds [NM_118417]
A_84_P22435	-2.25849	-1.17536	2.25849	down	AT5G01740	Arabidopsis thaliana Nuclear transport factor 2 (NTF2) family protein (AT5G01740) mRNA, complete cds [NM_120252]
A_84_P814238	-2.17808	-1.12306	2.17808	down	AT1G04680	Arabidopsis thaliana putative pectate lyase 1 (AT1G04680) mRNA, complete cds [NM_100348]
A_84_P99076	-2.90948	-1.54076	2.90948	down	AT3G24100	Arabidopsis thaliana uncharacterized protein (AT3G24100) mRNA, complete cds [NM_113315]
A_84_P16721	-2.60396	-1.3807	2.60396	down	AT4G35030	Arabidopsis thaliana protein kinase-like protein (AT4G35030) mRNA, complete cds [NM_119669]
A_84_P173491	-2.24694	-1.16796	2.24694	down	RGF9	Arabidopsis thaliana uncharacterized protein (RGF9) mRNA, complete cds [NM_125873]
A_84_P17058	-2.05454	-1.03881	2.05454	down	AT1G04680	Arabidopsis thaliana putative pectate lyase 1 (AT1G04680) mRNA, complete cds [NM_100348]
A_84_P18485	-2.25156	-1.17092	2.25156	down	SPPL5	Arabidopsis thaliana signal peptide peptidase-like 5 (SPPL5) mRNA, complete cds [NM_100463]
A_84_P786602	-2.41642	-1.27287	2.41642	down	AT1G45010	Arabidopsis thaliana TRAM, LAG1 and CLN8 (TLC) lipid-sensing domain containing protein (AT1G45010) mRNA, complete cds [NM_103581]
A_84_P23603	-3.57866	-1.83942	3.57866	down	AT1G34060	Arabidopsis thaliana Pyridoxal phosphate-dependent transferase domain-containing protein (AT1G34060) mRNA, complete cds [NM_103128]
A_84_P794227	-2.00616	-1.00444	2.00616	down		26-E014046-013-002-B02q-SP6r MPIZ-ADIS-013 Arabidopsis thaliana cDNA clone MPIZp770B022Q 3-PRIME, mRNA sequence [CB259755]
A_84_P78179	-4.67392	-2.22463	4.67392	down	CDC20.1	Arabidopsis thaliana cell division cycle 20, cofactor of APC complex (CDC20.1) mRNA, complete cds [NM_119481]
A_84_P508835	-4.51522	-2.1748	4.51522	down	AT5G60650	Arabidopsis thaliana uncharacterized protein (AT5G60650) mRNA, complete cds [NM_125458]
A_84_P769530	-2.60553	-1.38158	2.60553	down
A_84_P811148	-7.09707	-2.82722	7.09707	down	GH9C2	Arabidopsis thaliana endoglucanase 6 (GH9C2) mRNA, complete cds [NM_105114]
A_84_P535721	-5.25495	-2.39368	5.25495	down	AT1G76220	Arabidopsis thaliana uncharacterized protein (AT1G76220) mRNA, complete cds [NM_106272]
A_84_P14923	-4.72432	-2.24011	4.72432	down	CSLA02	Arabidopsis thaliana glucomannan 4-beta-mannosyltransferase 2 (CSLA02) mRNA, complete cds [NM_122180]
A_84_P15512	-7.11058	-2.82997	7.11058	down	KINESIN-12B	Arabidopsis thaliana putative phragmoplast-associated kinesin-related protein (KINESIN-12B) mRNA, complete cds [NM_001035673]
A_84_P101436	-2.37105	-1.24552	2.37105	down	AT5G54067	Arabidopsis thaliana mRNA for unknown protein, complete cds, clone: RAFL17-21-L01 [AK117565]
A_84_P521249	-4.20855	-2.07332	4.20855	down	AT5G54400	Arabidopsis thaliana S-adenosyl-L-methionine-dependent methyltransferase-like protein (AT5G54400) mRNA, complete cds [NM_124820]
A_84_P754221	-2.31877	-1.21336	2.31877	down	AT1G25141	Arabidopsis thaliana UDP-3-O-[3-hydroxymyristoyl] N-acetylglucosamine deacetylase (AT1G25141) mRNA, complete cds [NM_102326]
A_84_P13934	-11.1812	-3.483	11.1812	down	AT5G05270	Arabidopsis thaliana chalcone-flavanone isomerase-like proetin (AT5G05270) mRNA, complete cds [NM_180439]
A_84_P13964	-2.19752	-1.13587	2.19752	down	AT5G14230	Arabidopsis thaliana uncharacterized protein (AT5G14230) mRNA, complete cds [NM_121427]
A_84_P856328	-4.11391	-2.04051	4.11391	down	AT5G59050	Arabidopsis thaliana uncharacterized protein (AT5G59050) mRNA, complete cds [NM_125295]
A_84_P19931	-6.97093	-2.80135	6.97093	down	AT1G11730	Arabidopsis thaliana putative beta-1,3-galactosyltransferase 1 (AT1G11730) mRNA, complete cds [NM_101045]
A_84_P603414	-2.41408	-1.27147	2.41408	down	AT2G46940	Arabidopsis thaliana uncharacterized protein (AT2G46940) mRNA, complete cds [NM_130262]
A_84_P13247	-2.32696	-1.21845	2.32696	down	AT1G62520	Arabidopsis thaliana uncharacterized protein (AT1G62520) mRNA, complete cds [NM_104931]
A_84_P22673	-2.51654	-1.33144	2.51654	down	AT2G40435	Arabidopsis thaliana uncharacterized protein (AT2G40435) mRNA, complete cds [NM_129604]
A_84_P756314	-2.39221	-1.25834	2.39221	down
A_84_P511284	-2.98995	-1.58012	2.98995	down	AT4G24910	Arabidopsis thaliana uncharacterized protein (AT4G24910) mRNA, complete cds [NM_118623]
A_84_P792647	-2.38157	-1.25191	2.38157	down
A_84_P22300	-3.34286	-1.74108	3.34286	down	AT4G08300	Arabidopsis thaliana nodulin MtN21 /EamA-like transporter family protein (AT4G08300) mRNA, complete cds [NM_116899]
A_84_P547046	-2.80076	-1.48582	2.80076	down	GL3	Arabidopsis thaliana transcription factor GLABRA 3 (GL3) mRNA, complete cds [NM_148067]
A_84_P23120	-3.38745	-1.7602	3.38745	down	ENODL5	Arabidopsis thaliana early nodulin-like protein 5 (ENODL5) mRNA, complete cds [NM_112745]
A_84_P90919	-8.67664	-3.11714	8.67664	down	AT3G61950	Arabidopsis thaliana transcription factor bHLH67 (AT3G61950) mRNA, complete cds [NM_180404]
A_84_P12963	-3.19355	-1.67516	3.19355	down	HPL1	Arabidopsis thaliana hydroperoxide lyase 1 (HPL1) mRNA, complete cds [NM_117633]
A_84_P844852	-2.32944	-1.21998	2.32944	down		Rep: MATE efflux protein-related - Arabidopsis thaliana, partial (73%) [TC368373]
A_84_P821159	-4.44097	-2.15088	4.44097	down		Rep: At5g42860 - Arabidopsis thaliana (Mouse-ear cress), partial (39%) [TC388419]
A_84_P841109	-7.52058	-2.91084	7.52058	down		GB
A_84_P22951	-2.17545	-1.12132	2.17545	down	CYP705A9	Arabidopsis thaliana cytochrome P450, family 705, subfamily A, polypeptide 9 (CYP705A9) mRNA, complete cds [NM_128259]
A_84_P831679	-2.47574	-1.30786	2.47574	down	AT1G20920	Arabidopsis thaliana DEAD-box ATP-dependent RNA helicase 42 (AT1G20920) mRNA, complete cds [NM_001084102]
A_84_P15199	-10.9982	-3.45919	10.9982	down	AT1G59950	Arabidopsis thaliana NAD(P)-linked oxidoreductase-like protein (AT1G59950) mRNA, complete cds [NM_104687]
A_84_P611718	-2.08174	-1.05779	2.08174	down	AT4G38380	Arabidopsis thaliana mate efflux domain-containing protein (AT4G38380) mRNA, complete cds [NM_120000]
A_84_P572382	-2.22517	-1.15391	2.22517	down	AT3G57780	Arabidopsis thaliana uncharacterized protein (AT3G57780) mRNA, complete cds [NM_115638]
A_84_P23106	-2.49408	-1.31851	2.49408	down	NUDT12	Arabidopsis thaliana nudix hydrolase 12 (NUDT12) mRNA, complete cds [NM_101159]
A_84_P92269	-8.40396	-3.07107	8.40396	down		GB
A_84_P83919	-4.03825	-2.01373	4.03825	down	AT2G21560	Arabidopsis thaliana uncharacterized protein (AT2G21560) mRNA, complete cds [NM_127728]
A_84_P16049	-3.17832	-1.66826	3.17832	down	AT2G07713	Arabidopsis thaliana uncharacterized protein (AT2G07713) mRNA, complete cds [NM_126753]
A_84_P557013	-14.5947	-3.86737	14.5947	down	AT2G04830	Arabidopsis thaliana uncharacterized protein (AT2G04830) mRNA, complete cds [NM_126514]
A_84_P11145	-2.54279	-1.34641	2.54279	down	AT5G23170	Arabidopsis thaliana serine/threonine-protein kinase-like protein (AT5G23170) mRNA, complete cds [NM_122223]
A_84_P15991	-2.51549	-1.33084	2.51549	down	AtVEX1	Arabidopsis thaliana nodulin MtN3-like protein (AtVEX1) mRNA, complete cds [NM_125680]
A_84_P129566	-3.22868	-1.69094	3.22868	down	CLPB2	Arabidopsis thaliana casein lytic proteinase B2 (CLPB2) mRNA, complete cds [NM_117549]
A_84_P789984	-2.55281	-1.35209	2.55281	down
A_84_P571337	-2.40893	-1.26839	2.40893	down	AT2G46380	Arabidopsis thaliana uncharacterized protein (AT2G46380) mRNA, complete cds [NM_130202]
A_84_P130716	-2.03844	-1.02747	2.03844	down	AT2G27740	Arabidopsis thaliana uncharacterized protein (AT2G27740) mRNA, complete cds [NM_128333]
A_84_P793801	-2.00756	-1.00545	2.00756	down	SBE2.1	AV791002 RAFL7 Arabidopsis thaliana cDNA clone RAFL07-08-G05 3', mRNA sequence [AV791002]
A_84_P516786	-5.8978	-2.56018	5.8978	down	AT5G45700	Arabidopsis thaliana haloacid dehalogenase-like hydrolase domain-containing protein (AT5G45700) mRNA, complete cds [NM_123937]
A_84_P11310	-4.89176	-2.29035	4.89176	down	HXK3	Arabidopsis thaliana hexokinase-like 1 protein (HXK3) mRNA, complete cds [NM_103682]
A_84_P840413	-2.57715	-1.36578	2.57715	down	AT1G20590	Arabidopsis thaliana putative cyclin (AT1G20590) mRNA, complete cds [NM_101910]
A_84_P166633	-2.01653	-1.01188	2.01653	down	AT3G14560	Arabidopsis thaliana uncharacterized protein (AT3G14560) mRNA, complete cds [NM_112316]
A_84_P847423	-3.10217	-1.63328	3.10217	down		Rep: AT5g16250/T21H19_170 - Arabidopsis thaliana (Mouse-ear cress), partial (63%) [TC387780]
A_84_P23340	-4.33469	-2.11593	4.33469	down	GBF6	Arabidopsis thaliana G-box binding factor 6 (GBF6) mRNA, complete cds [NM_119625]
A_84_P725217	-5.64103	-2.49596	5.64103	down	AT1G77815	AYARH01TF pooled cDNA populations Arabidopsis thaliana cDNA, mRNA sequence [EG453975]
A_84_P811808	-2.61257	-1.38547	2.61257	down	FLR1	Arabidopsis thaliana polygalacturonase inhibitory protein-like protein (FLR1) mRNA, complete cds [NM_202562]
A_84_P805958	-3.12242	-1.64266	3.12242	down	CCR2	Arabidopsis thaliana glycine-rich RNA-binding protein 7 (CCR2) mRNA, complete cds [NM_179686]
A_84_P23938	-3.84512	-1.94303	3.84512	down	PDR5	Arabidopsis thaliana ABC transporter G family member 33 (PDR5) mRNA, complete cds [NM_129284]
A_84_P20333	-2.15075	-1.10484	2.15075	down	AT3G51720	Arabidopsis thaliana uncharacterized protein (AT3G51720) mRNA, complete cds [NM_115031]
A_84_P21769	-2.08455	-1.05974	2.08455	down	TPS04	Arabidopsis thaliana terpene synthase 04 (TPS04) mRNA, complete cds [NM_104793]
A_84_P14418	-2.34496	-1.22956	2.34496	down	AT2G40230	Arabidopsis thaliana HXXXD-type acyl-transferase-like protein (AT2G40230) mRNA, complete cds [NM_129581]
A_84_P844125	-2.35256	-1.23423	2.35256	down
A_84_P11918	-2.34309	-1.22841	2.34309	down	ATCSLA15	Arabidopsis thaliana putative mannan synthase 15 (ATCSLA15) mRNA, complete cds [NM_117415]
A_84_P797208	-2.07394	-1.05238	2.07394	down	AT2G23790	Arabidopsis thaliana uncharacterized protein (AT2G23790) mRNA, complete cds [NM_127942]
A_84_P590665	-2.41835	-1.27403	2.41835	down	AT1G22220	Arabidopsis thaliana F-box protein (AT1G22220) mRNA, complete cds [NM_102072]
A_84_P757762	-2.77511	-1.47254	2.77511	down		Arabidopsis thaliana Full-length cDNA Complete sequence from clone GSLTSIL38ZE01 of Silique of strain col-0 of Arabidopsis thaliana (thale cress) [BX821393]
A_84_P21269	-5.08547	-2.34638	5.08547	down	AT1G48590	Arabidopsis thaliana calcium-dependent lipid-binding domain (AT1G48590) mRNA, complete cds [NM_103755]
A_84_P818163	-2.04187	-1.02989	2.04187	down	RKL1	Arabidopsis thaliana receptor-like kinase 1 (RKL1) mRNA, complete cds [NM_103744]
A_84_P16304	-2.12699	-1.08881	2.12699	down	MYB7	Arabidopsis thaliana myb domain protein 7 (MYB7) mRNA, complete cds [NM_127224]
A_84_P800959	-6.04701	-2.59622	6.04701	down	AT4G15160	Arabidopsis thaliana bifunctional inhibitor/lipid-transfer protein/seed storage 2S albumin-like protein (AT4G15160) mRNA, complete cds [NM_117605]
A_84_P22067	-4.06182	-2.02213	4.06182	down	AT2G01210	Arabidopsis thaliana leucine-rich repeat transmembrane protein kinase-like protein (AT2G01210) mRNA, complete cds [NM_126182]
A_84_P10315	-2.13718	-1.09571	2.13718	down	CNX1	Arabidopsis thaliana calnexin 1 (CNX1) mRNA, complete cds [NM_125573]
A_84_P22240	-2.13247	-1.09253	2.13247	down	AT3G55100	Arabidopsis thaliana ABC transporter G family member 17 (AT3G55100) mRNA, complete cds [NM_115368]
A_84_P503731	-3.17439	-1.66648	3.17439	down	AT1G54575	Arabidopsis thaliana uncharacterized protein (AT1G54575) mRNA, complete cds [NM_202299]
A_84_P65224	-2.55368	-1.35258	2.55368	down	ARF10	Arabidopsis thaliana auxin response factor 10 (ARF10) mRNA, complete cds [NM_128394]
A_84_P16137	-2.2466	-1.16774	2.2466	down	AT1G10530	Arabidopsis thaliana uncharacterized protein (AT1G10530) mRNA, complete cds [NM_100928]
A_84_P14527	-7.9977	-2.99958	7.9977	down	RABA3	Arabidopsis thaliana Rab family protein (RABA3) mRNA, complete cds [NM_100002]
A_84_P18237	-7.06774	-2.82125	7.06774	down	AT1G07710	Arabidopsis thaliana ankyrin repeats-containing protein (AT1G07710) mRNA, complete cds [NM_100645]
A_84_P568745	-3.80707	-1.92868	3.80707	down	AT3G27250	Arabidopsis thaliana uncharacterized protein (AT3G27250) mRNA, complete cds [NM_113639]
A_84_P12091	-2.01602	-1.01151	2.01602	down	AT5G23400	Arabidopsis thaliana leucine-rich repeat-containing protein (AT5G23400) mRNA, complete cds [NM_122246]
A_84_P16907	-7.98086	-2.99654	7.98086	down	AT5G55830	Arabidopsis thaliana concanavalin A-like lectin kinase-like protein (AT5G55830) mRNA, complete cds [NM_124965]
A_84_P15790	-4.24799	-2.08678	4.24799	down	CCR1	Arabidopsis thaliana glycine-rich RNA-binding protein 8 (CCR1) mRNA, complete cds [NM_179194]
A_84_P834417	-2.45973	-1.2985	2.45973	down	AT3G03140	Arabidopsis thaliana PWWP domain-containing protein (AT3G03140) mRNA, complete cds [NM_111184]
A_84_P597183	-5.24559	-2.3911	5.24559	down	AT2G45900	Arabidopsis thaliana Phosphatidylinositol N-acetyglucosaminlytransferase subunit P-like protein (AT2G45900) mRNA, complete cds [NM_130153]
A_84_P117272	-2.03865	-1.02762	2.03865	down	AT4G31890	Arabidopsis thaliana armadillo/beta-catenin-like repeat-containing protein (AT4G31890) mRNA, complete cds [NM_001203954]
A_84_P21553	-2.376	-1.24854	2.376	down	CIPK25	Arabidopsis thaliana CBL-interacting serine/threonine-protein kinase 25 (CIPK25) mRNA, complete cds [NM_122420]
A_84_P19383	-8.25311	-3.04494	8.25311	down	MNP	Arabidopsis thaliana GATA transcription factor 18 (MNP) mRNA, complete cds [NM_114947]
A_84_P838135	-2.50759	-1.3263	2.50759	down	PDR11	Arabidopsis thaliana ABC transporter G family member 39 (PDR11) mRNA, complete cds [NM_105366]
A_84_P839512	-5.0279	-2.32996	5.0279	down	AT4G10845	Arabidopsis thaliana uncharacterized protein (AT4G10845) mRNA, complete cds [NM_117153]
A_84_P159845	-11.6048	-3.53665	11.6048	down	AT14A	Arabidopsis thaliana uncharacterized protein (AT14A) mRNA, complete cds [NM_113748]
A_84_P14260	-2.97425	-1.57252	2.97425	down	ATCHX1	Arabidopsis thaliana cation/H(+) antiporter 1 (ATCHX1) mRNA, complete cds [NM_101504]
A_84_P242453	-3.71977	-1.89521	3.71977	down	AT5G22020	Arabidopsis thaliana strictosidine synthase family protein (AT5G22020) mRNA, complete cds [NM_147884]
A_84_P206348	-2.33581	-1.22392	2.33581	down	AT1G60060	Arabidopsis thaliana serine/threonine-protein kinase WNK (With No lysine)-related protein (AT1G60060) mRNA, complete cds [NM_104698]
A_84_P22168	-3.22138	-1.68768	3.22138	down		Arabidopsis thaliana mRNA for hypothetical protein, complete cds, clone: RAFL17-43-H14 [AK229539]
A_84_P851906	-2.14356	-1.10001	2.14356	down	AT2G23790	Arabidopsis thaliana uncharacterized protein (AT2G23790) mRNA, complete cds [NM_127942]
A_84_P17359	-2.20712	-1.14216	2.20712	down	AT3G02250	Arabidopsis thaliana O-fucosyltransferase-like protein (AT3G02250) mRNA, complete cds [NM_111092]
A_84_P11449	-4.00631	-2.00228	4.00631	down	AT1G79620	Arabidopsis thaliana leucine-rich repeat protein kinase-like protein (AT1G79620) mRNA, complete cds [NM_106611]
A_84_P839405	-16.2864	-4.0256	16.2864	down
A_84_P817628	-8.94501	-3.16108	8.94501	down	JAL23	Arabidopsis thaliana myrosinase-binding protein-like protein (JAL23) mRNA, complete cds [NM_129490]
A_84_P757095	-3.31398	-1.72856	3.31398	down	AT2G12462	Arabidopsis thaliana uncharacterized protein (AT2G12462) mRNA, complete cds [NM_001036271]
A_84_P57310	-7.29051	-2.86602	7.29051	down	EXPB3	Arabidopsis thaliana expansin B3 (EXPB3) mRNA, complete cds [NM_118965]
A_84_P562578	-9.58665	-3.26103	9.58665	down	AT3G54520	Arabidopsis thaliana uncharacterized protein (AT3G54520) mRNA, complete cds [NM_115309]
A_84_P10418	-2.24434	-1.16629	2.24434	down	AT1G51440	Arabidopsis thaliana phospholipase A1-Igamma3 (AT1G51440) mRNA, complete cds [NM_104022]
A_84_P10681	-5.13274	-2.35973	5.13274	down	GATA2	Arabidopsis thaliana GATA transcription factor 2 (GATA2) mRNA, complete cds [NM_130069]
A_84_P282890	-2.1345	-1.0939	2.1345	down	AT5G47610	Arabidopsis thaliana RING-H2 finger protein ATL79 (AT5G47610) mRNA, complete cds [NM_124134]
A_84_P507306	-4.73275	-2.24268	4.73275	down	AT1G68580	Arabidopsis thaliana agenet domain-containing protein / bromo-adjacent homology (BAH) domain-containing protein (AT1G68580) mRNA, complete cds [NM_179531]
A_84_P554974	-2.02888	-1.02068	2.02888	down	AT1G04090	Arabidopsis thaliana uncharacterized protein (AT1G04090) mRNA, complete cds [NM_100290]
A_84_P17310	-4.02847	-2.01023	4.02847	down	AT2G30830	Arabidopsis thaliana 2-oxoglutarate (2OG) and Fe(II)-dependent oxygenase-like protein (AT2G30830) mRNA, complete cds [NM_128636]
A_84_P10891	-2.14895	-1.10363	2.14895	down	AMP1	Arabidopsis thaliana glutamate carboxypeptidase II (AMP1) mRNA, complete cds [NM_115329]
A_84_P766497	-2.14349	-1.09996	2.14349	down	TBL3	Arabidopsis thaliana uncharacterized protein (TBL3) mRNA, complete cds [NM_001036741]
A_84_P18357	-2.02352	-1.01687	2.02352	down	AT3G17060	Arabidopsis thaliana putative pectinesterase 67 (AT3G17060) mRNA, complete cds [NM_112582]
A_84_P23404	-9.03922	-3.1762	9.03922	down	TT7	Arabidopsis thaliana Flavonoid 3'-monooxygenase (TT7) mRNA, complete cds [NM_120881]
A_84_P16037	-8.63374	-3.10999	8.63374	down	PAP1	Arabidopsis thaliana transcription factor MYB75 (PAP1) mRNA, complete cds [NM_104541]
A_84_P21138	-4.16328	-2.05772	4.16328	down	CYCB1;3	Arabidopsis thaliana cyclin-B1-3 (CYCB1;3) mRNA, complete cds [NM_111985]
A_84_P12026	-2.76771	-1.46869	2.76771	down	UBC17	Arabidopsis thaliana putative ubiquitin-conjugating enzyme E2 17 (UBC17) mRNA, complete cds [NM_119804]
A_84_P22784	-5.50809	-2.46155	5.50809	down	KNATM	Arabidopsis thaliana protein KNATM (KNATM) mRNA, complete cds [NM_101345]
A_84_P14495	-6.0814	-2.6044	6.0814	down	AT1G41820	Arabidopsis thaliana uncharacterized protein (AT1G41820) mRNA, complete cds [NM_103406]
A_84_P91619	-2.25944	-1.17596	2.25944	down	AT2G17710	Arabidopsis thaliana uncharacterized protein (AT2G17710) mRNA, complete cds [NM_127325]
A_84_P18814	-2.32056	-1.21447	2.32056	down	AT5G59670	Arabidopsis thaliana Receptor-like protein kinase (AT5G59670) mRNA, complete cds [NM_125359]
A_84_P852482	-2.4604	-1.29889	2.4604	down	RLP33	Arabidopsis thaliana receptor like protein 33 (RLP33) mRNA, complete cds [NM_111439]
A_84_P852973	-2.18982	-1.13081	2.18982	down	AT5G23830	Arabidopsis thaliana MD-2-related lipid recognition domain-containing protein (AT5G23830) mRNA, complete cds [NM_122288]
A_84_P862159	-2.65566	-1.40907	2.65566	down	TAT3	Arabidopsis thaliana tyrosine aminotransferase 3 (TAT3) mRNA, complete cds [NM_128044]
A_84_P571026	-7.79876	-2.96324	7.79876	down	AT1G13040	Arabidopsis thaliana pentatricopeptide repeat-containing protein (AT1G13040) mRNA, complete cds [NM_101174]
A_84_P593106	-111.512	-6.80105	111.512	down	NUDT24	Arabidopsis thaliana nudix hydrolase 24 (NUDT24) mRNA, complete cds [NM_121952]
A_84_P23611	-8.6834	-3.11826	8.6834	down	AT5G38440	Arabidopsis thaliana self-incompatibility S1 family protein (AT5G38440) mRNA, complete cds [NM_123205]
A_84_P755941	-3.15294	-1.6567	3.15294	down
A_84_P15355	-2.6614	-1.41219	2.6614	down	NSP2	Arabidopsis thaliana Nitrile-specifier protein 2 (NSP2) mRNA, complete cds [NM_128867]
A_84_P16245	-3.18981	-1.67347	3.18981	down	UGT71C3	Arabidopsis thaliana UDP-glucosyl transferase 71C3 (UGT71C3) mRNA, complete cds [NM_100600]
A_84_P764774	-23.7111	-4.56749	23.7111	down	SCRL23	Arabidopsis thaliana defensin-like protein 232 (SCRL23) mRNA, complete cds [NM_001036566]
A_84_P10670	-2.02325	-1.01667	2.02325	down	RAP2.7	Arabidopsis thaliana ethylene-responsive transcription factor RAP2-7 (RAP2.7) mRNA, complete cds [NM_201824]
A_84_P541646	-2.35874	-1.23802	2.35874	down	AT5G59020	Arabidopsis thaliana uncharacterized protein (AT5G59020) mRNA, complete cds [NM_125292]
A_84_P14044	-4.21473	-2.07544	4.21473	down	AT1G29540	Arabidopsis thaliana uncharacterized protein (AT1G29540) mRNA, complete cds [NM_102694]
A_84_P712003	-6.97814	-2.80284	6.97814	down	AT5G47030	AV544975 Arabidopsis thaliana roots Columbia Arabidopsis thaliana cDNA clone RZ66c03F 3', mRNA sequence [AV544975]
A_84_P23446	-3.03574	-1.60205	3.03574	down	SHN2	Arabidopsis thaliana ethylene-responsive transcription factor SHINE 3 (SHN2) mRNA, complete cds [NM_180742]
A_84_P17806	-6.45675	-2.69081	6.45675	down	DFR	Arabidopsis thaliana dihydroflavonol-4-reductase (DFR) mRNA, complete cds [NM_123645]
A_84_P11858	-4.5654	-2.19074	4.5654	down	AT3G59710	Arabidopsis thaliana Rossmann-fold NAD(P)-binding domain-containing protein (AT3G59710) mRNA, complete cds [NM_115833]
A_84_P805360	-6.84282	-2.77459	6.84282	down	AGP31	Arabidopsis thaliana arabinogalactan protein 31 (AGP31) mRNA, complete cds [NM_102594]
A_84_P11867	-2.34741	-1.23107	2.34741	down	AT3G62040	Arabidopsis thaliana haloacid dehalogenase-like hydrolase domain-containing protein (AT3G62040) mRNA, complete cds [NM_116069]
A_84_P844313	-6.14609	-2.61967	6.14609	down		Rep: Similarity to protein encoded by GenBank Accession Number U41815 - Arabidopsis thaliana (Mouse-ear cress), complete [TC360323]
A_84_P223829	-2.79247	-1.48154	2.79247	down	AT2G44670	Arabidopsis thaliana uncharacterized protein (AT2G44670) mRNA, complete cds [NM_130031]
A_84_P846073	-2.64036	-1.40073	2.64036	down	AT4G14190	Arabidopsis thaliana pentatricopeptide repeat-containing protein (AT4G14190) mRNA, complete cds [NM_117496]
A_84_P272560	-2.52213	-1.33464	2.52213	down	AT3G12970	Arabidopsis thaliana uncharacterized protein (AT3G12970) mRNA, complete cds [NM_112134]
A_84_P750861	-27.3736	-4.77471	27.3736	down
A_84_P836018	-2.37478	-1.2478	2.37478	down		AAF07368.1 - Arabidopsis thaliana (Mouse-ear cress), partial (18%) [TC388272]
A_84_P810358	-3.86644	-1.95101	3.86644	down	PBP1	Arabidopsis thaliana PYK10-binding protein 1 (PBP1) mRNA, complete cds [NM_001035633]
A_84_P20018	-2.21066	-1.14448	2.21066	down	AT1G12630	Arabidopsis thaliana ethylene-responsive transcription factor ERF027 (AT1G12630) mRNA, complete cds [NM_101133]
A_84_P820568	-2.43678	-1.28498	2.43678	down
A_84_P818059	-9.18144	-3.19872	9.18144	down	AT5G57345	Arabidopsis thaliana mRNA for hypothetical protein, complete cds, clone: RAFL14-23-I18 [AK227648]
A_84_P514702	-2.06009	-1.04271	2.06009	down	AT3G51290	Arabidopsis thaliana uncharacterized protein (AT3G51290) mRNA, complete cds [NM_114988]
A_84_P800699	-6.86646	-2.77957	6.86646	down		AYBDD35TR pooled cDNA populations Arabidopsis thaliana cDNA, mRNA sequence [EG512782]
A_84_P563065	-2.15617	-1.10847	2.15617	down	AT1G30250	Arabidopsis thaliana uncharacterized protein (AT1G30250) mRNA, complete cds [NM_102764]
A_84_P21556	-2.10261	-1.07218	2.10261	down	IAA28	Arabidopsis thaliana auxin-responsive protein IAA28 (IAA28) mRNA, complete cds [NM_122490]
A_84_P12991	-3.10081	-1.63264	3.10081	down	AT5G05790	Arabidopsis thaliana duplicated SANT DNA-binding domain-containing protein (AT5G05790) mRNA, complete cds [NM_120661]
A_84_P568081	-4.76507	-2.2525	4.76507	down	AT5G04700	Arabidopsis thaliana Ankyrin repeat family protein (AT5G04700) mRNA, complete cds [NM_120552]
A_84_P22843	-2.03122	-1.02235	2.03122	down	AT1G76790	Arabidopsis thaliana O-methyltransferase-like protein (AT1G76790) mRNA, complete cds [NM_106329]
A_84_P846493	-2.39785	-1.26174	2.39785	down		Rep: T25K16.10 - Arabidopsis thaliana (Mouse-ear cress), partial (19%) [TC396415]
A_84_P720423	-2.13618	-1.09503	2.13618	down	AT2G36026	Arabidopsis thaliana Ovate family protein (AT2G36026) mRNA, complete cds [NM_001124977]
A_84_P559854	-3.27257	-1.71042	3.27257	down	AT3G20830	Arabidopsis thaliana AGC (cAMP-dependent, cGMP-dependent and protein kinase C) kinase family protein (AT3G20830) mRNA, complete cds [NM_112974]
A_84_P594345	-8.20389	-3.03631	8.20389	down	CYP96A14P	Arabidopsis thaliana cytochrome P450, family 96, subfamily A, polypeptide 14 pseudogene (CYP96A14P) mRNA, complete cds [NM_105274]
A_84_P806838	-3.41302	-1.77105	3.41302	down	ATA20	Arabidopsis thaliana anther 20 (ATA20) mRNA, complete cds [NM_112408]
A_84_P13631	-2.47056	-1.30484	2.47056	down	AT3G25190	Arabidopsis thaliana vacuolar iron transporter-like protein (AT3G25190) mRNA, complete cds [NM_113425]
A_84_P22969	-4.83901	-2.27471	4.83901	down		GB
A_84_P788604	-2.04777	-1.03406	2.04777	down		Arabidopsis thaliana hypothetical protein (At2g13130 [AY227633]
A_84_P11542	-4.45893	-2.1567	4.45893	down	AT1G35410	Arabidopsis thaliana uncharacterized protein (AT1G35410) mRNA, complete cds [NM_103236]
A_84_P100216	-2.6878	-1.42642	2.6878	down	AT5G54240	Arabidopsis thaliana uncharacterized protein (AT5G54240) mRNA, complete cds [NM_124804]
A_84_P16470	-2.37348	-1.247	2.37348	down	CIPK7	Arabidopsis thaliana CBL-interacting serine/threonine-protein kinase 7 (CIPK7) mRNA, complete cds [NM_113200]
A_84_P22778	-3.85981	-1.94853	3.85981	down	GSTU26	Arabidopsis thaliana glutathione S-transferase tau 26 (GSTU26) mRNA, complete cds [NM_101580]
A_84_P252295	-2.17117	-1.11848	2.17117	down	AT1G64290	Arabidopsis thaliana F-box protein-like protein (AT1G64290) mRNA, complete cds [NM_105103]
A_84_P21490	-2.93953	-1.55558	2.93953	down	AT5G01890	Arabidopsis thaliana leucine-rich receptor-like protein kinase (AT5G01890) mRNA, complete cds [NM_120267]
A_84_P10415	-12.2949	-3.61999	12.2949	down	MBP2	Arabidopsis thaliana myrosinase-binding protein 2 (MBP2) mRNA, complete cds [NM_179463]
A_84_P857666	-3.88733	-1.95878	3.88733	down
A_84_P22457	-3.29911	-1.72208	3.29911	down	AT5G07800	Arabidopsis thaliana flavin-containing monooxygenase-like protein (AT5G07800) mRNA, complete cds [NM_120862]
A_84_P812992	-2.47286	-1.30618	2.47286	down	TMO6	Arabidopsis thaliana Dof zinc finger protein DOF5.3 (TMO6) mRNA, complete cds [NM_125413]
A_84_P727603	-2.17358	-1.12007	2.17358	down
A_84_P739644	-4.85447	-2.27931	4.85447	down	AT1G70260	Arabidopsis thaliana nodulin MtN21 /EamA-like transporter protein (AT1G70260) mRNA, complete cds [NM_105694]
A_84_P272660	-3.35688	-1.74712	3.35688	down	AT3G42725	Arabidopsis thaliana Putative membrane lipoprotein (AT3G42725) mRNA, complete cds [NM_114140]
A_84_P12386	-2.24648	-1.16767	2.24648	down	AT1G65920	Arabidopsis thaliana Regulator of chromosome condensation (RCC1) family with FYVE zinc finger domain (AT1G65920) mRNA, complete cds [NM_105264]
A_84_P867007	-2.21244	-1.14564	2.21244	down	CYP710A4	Arabidopsis thaliana cytochrome P450, family 710, subfamily A (CYP710A4) mRNA, complete cds [NM_128445]
A_84_P22852	-2.68882	-1.42697	2.68882	down	AT1G01520	Arabidopsis thaliana myb family transcription factor (AT1G01520) mRNA, complete cds [NM_100034]
A_84_P94199	-3.06943	-1.61797	3.06943	down	AT2G29670	Arabidopsis thaliana tetratricopeptide repeat-containing protein (AT2G29670) mRNA, complete cds [NM_128521]
A_84_P15585	-2.02078	-1.01491	2.02078	down	RKL1	Arabidopsis thaliana receptor-like kinase 1 (RKL1) mRNA, complete cds [NM_103744]
A_84_P19143	-2.25217	-1.17132	2.25217	down	AT1G21050	Arabidopsis thaliana uncharacterized protein (AT1G21050) mRNA, complete cds [NM_101958]
A_84_P803914	-3.70539	-1.88963	3.70539	down	POL	Arabidopsis thaliana membrane associated protein phosphatase 2C (POL) mRNA, complete cds [NM_180133]
A_84_P852158	-3.44631	-1.78505	3.44631	down		Rep: Jasmonate inducible protein - Brassica napus (Rape), partial (9%) [TC404416]
A_84_P838080	-2.04304	-1.03072	2.04304	down		Rep: Photosystem I P700 chlorophyll a apoprotein A1 - Arabidopsis thaliana (Mouse-ear cress), complete [TC383916]
A_84_P795779	-2.20699	-1.14208	2.20699	down
A_84_P571367	-10.2748	-3.36104	10.2748	down	AT3G08490	Arabidopsis thaliana uncharacterized protein (AT3G08490) mRNA, complete cds [NM_111684]
A_84_P841696	-2.22294	-1.15247	2.22294	down	AT1G33170	Arabidopsis thaliana putative methyltransferase PMT18 (AT1G33170) mRNA, complete cds [NM_103049]
A_84_P11627	-2.021	-1.01507	2.021	down	AT2G45040	Arabidopsis thaliana matrix metalloprotease domain-containing protein (AT2G45040) mRNA, complete cds [NM_130068]
A_84_P789780	-3.01652	-1.59289	3.01652	down	AT3G24100	Arabidopsis thaliana uncharacterized protein (AT3G24100) mRNA, complete cds [NM_113315]
A_84_P835465	-2.17148	-1.11868	2.17148	down	ATMND1	Arabidopsis thaliana meiotic nuclear division protein 1-like protein (ATMND1) mRNA, complete cds [NM_001085000]
A_84_P23555	-10.2521	-3.35785	10.2521	down	ARF2	Arabidopsis thaliana auxin response factor 2 (ARF2) mRNA, complete cds [NM_001203662]
A_84_P515251	-6.76688	-2.75849	6.76688	down		Rep: Chromosome undetermined scaffold_109, whole genome shotgun sequence - Vitis vinifera (Grape), partial (77%) [TC371753]
A_84_P11435	-2.1923	-1.13244	2.1923	down	HTH	Arabidopsis thaliana protein HOTHEAD (HTH) mRNA, complete cds [NM_105955]
A_84_P801011	-2.11177	-1.07845	2.11177	down	AT5G39320	Arabidopsis thaliana putative UDP-glucose 6-dehydrogenase 2 (AT5G39320) mRNA, complete cds [NM_123294]
A_84_P837319	-5.1078	-2.3527	5.1078	down
A_84_P12973	-2.27069	-1.18313	2.27069	down	AP2	Arabidopsis thaliana Floral homeotic protein APETALA 2 (AP2) mRNA, complete cds [NM_119856]
A_84_P248795	-5.19784	-2.37791	5.19784	down	AT2G41470	Arabidopsis thaliana uncharacterized protein (AT2G41470) mRNA, complete cds [NM_129710]
A_84_P831196	-2.02924	-1.02094	2.02924	down		Rep: Kinesin-like protein - Arabidopsis thaliana (Mouse-ear cress), complete [TC402965]
A_84_P859664	-2.34749	-1.23112	2.34749	down	FLS5	Arabidopsis thaliana flavonol synthase 5 (FLS5) mRNA, complete cds [NM_125755]
A_84_P843965	-2.39351	-1.25913	2.39351	down	AT5G11360	Arabidopsis thaliana Interleukin-1 receptor-associated kinase 4 protein (AT5G11360) mRNA, complete cds [NM_001161236]
A_84_P834569	-2.85686	-1.51443	2.85686	down	PDR1	Arabidopsis thaliana ABC transporter G family member 29 (PDR1) mRNA, complete cds [NM_112505]
A_84_P769464	-7.24199	-2.85639	7.24199	down	AT5G27260	Arabidopsis thaliana uncharacterized protein (AT5G27260) mRNA, complete cds [NM_122608]
A_84_P819781	-5.7331	-2.51932	5.7331	down	MCA1	Arabidopsis thaliana PLAC8 domain-containing protein (MCA1) mRNA, complete cds [NM_119759]
A_84_P16678	-4.02774	-2.00997	4.02774	down	GA20OX1	Arabidopsis thaliana gibberellin 20 oxidase 1 (GA20OX1) mRNA, complete cds [NM_118674]
A_84_P231779	-2.97978	-1.57521	2.97978	down	AT2G43445	Arabidopsis thaliana F-box/kelch-repeat protein (AT2G43445) mRNA, complete cds [NM_001084580]
A_84_P21760	-7.26417	-2.8608	7.26417	down	AT1G03940	Arabidopsis thaliana HXXXD-type acyl-transferase family protein (AT1G03940) mRNA, complete cds [NM_100275]
A_84_P21349	-2.08004	-1.05661	2.08004	down	AT4G04760	Arabidopsis thaliana sugar transporter ERD6-like 15 (AT4G04760) mRNA, complete cds [NM_116714]
A_84_P113022	-2.0601	-1.04272	2.0601	down	AT3G05980	Arabidopsis thaliana uncharacterized protein (AT3G05980) mRNA, complete cds [NM_111472]
A_84_P57110	-6.91087	-2.78887	6.91087	down	AT5G02980	Arabidopsis thaliana putative F-box/kelch-repeat protein (AT5G02980) mRNA, complete cds [NM_120376]
A_84_P786186	-2.11665	-1.08178	2.11665	down	AT1G14580	Arabidopsis thaliana C2H2-like zinc finger protein (AT1G14580) mRNA, complete cds [NM_001198065]
A_84_P209848	-2.16212	-1.11244	2.16212	down	AT1G21460	Arabidopsis thaliana Nodulin MtN3-like protein (AT1G21460) mRNA, complete cds [NM_101997]
A_84_P841564	-9.24135	-3.2081	9.24135	down		GB
A_84_P834724	-2.17314	-1.11978	2.17314	down	AT3G62050	Arabidopsis thaliana Putative endonuclease or glycosyl hydrolase (AT3G62050) mRNA, complete cds [NM_116070]
A_84_P565460	-2.92822	-1.55003	2.92822	down	AT5G19260	Arabidopsis thaliana uncharacterized protein (AT5G19260) mRNA, complete cds [NM_121931]
A_84_P541541	-2.30678	-1.20588	2.30678	down	AT5G20640	Arabidopsis thaliana uncharacterized protein (AT5G20640) mRNA, complete cds [NM_122071]
A_84_P210848	-2.24648	-1.16767	2.24648	down	AT5G22930	Arabidopsis thaliana uncharacterized protein (AT5G22930) mRNA, complete cds [NM_122199]
A_84_P18822	-2.02812	-1.02015	2.02812	down	MYB28	Arabidopsis thaliana myb domain protein 28 (MYB28) mRNA, complete cds [NM_180910]
A_84_P18482	-2.63595	-1.39833	2.63595	down	BRH1	Arabidopsis thaliana brassinosteroid-responsive RING-H2 (BRH1) mRNA, complete cds [NM_116011]
A_84_P805112	-8.59067	-3.10277	8.59067	down	FLA1	Arabidopsis thaliana fasciclin-like arabinogalactan protein 1 (FLA1) mRNA, complete cds [NM_001203621]
A_84_P840333	-27.4482	-4.77864	27.4482	down		GB
A_84_P229069	-3.47073	-1.79524	3.47073	down	AT5G57130	Arabidopsis thaliana Clp amino terminal domain-containing protein (AT5G57130) mRNA, complete cds [NM_125095]
A_84_P815008	-5.44387	-2.44463	5.44387	down
A_84_P169473	-4.89902	-2.29249	4.89902	down	AT5G30500	Arabidopsis thaliana putative galactinol synthase (AT5G30500) mRNA, complete cds [NM_180571]
A_84_P21673	-13.3417	-3.73787	13.3417	down	BGLU18	Arabidopsis thaliana beta glucosidase 18 (BGLU18) mRNA, complete cds [NM_104118]
A_84_P237923	-4.65857	-2.21989	4.65857	down	AT1G68470	Arabidopsis thaliana Exostosin family protein (AT1G68470) mRNA, complete cds [NM_105518]
A_84_P67694	-2.46275	-1.30027	2.46275	down	WAVE1	Arabidopsis thaliana protein SCAR1 (WAVE1) mRNA, complete cds [NM_179894]
A_84_P832975	-2.02955	-1.02116	2.02955	down		Rep: F5D14.16 protein - Arabidopsis thaliana (Mouse-ear cress), partial (96%) [TC391030]
A_84_P859880	-2.73809	-1.45317	2.73809	down	AT4G09500	Arabidopsis thaliana glycosyltransferase family protein (AT4G09500) mRNA, complete cds [NM_117018]
A_84_P14336	-104.492	-6.70725	104.492	down	THI2.1	Arabidopsis thaliana thionin 2.1 (THI2.1) mRNA, complete cds [NM_105885]
A_84_P17366	-3.18034	-1.66918	3.18034	down	AT1G01250	Arabidopsis thaliana ethylene-responsive transcription factor ERF023 (AT1G01250) mRNA, complete cds [NM_100008]
A_84_P798708	-2.02839	-1.02034	2.02839	down
A_84_P582270	-7.10199	-2.82822	7.10199	down	AT4G22235	Arabidopsis thaliana defensin-like protein 95 (AT4G22235) mRNA, complete cds [NM_001036619]
A_84_P767328	-21.7258	-4.44134	21.7258	down
A_84_P502023	-9.13036	-3.19067	9.13036	down	AT2G03000	Arabidopsis thaliana RING/U-box domain-containing protein (AT2G03000) mRNA, complete cds [NM_126352]
A_84_P20479	-2.34139	-1.22737	2.34139	down	PAP2	Arabidopsis thaliana auxin-responsive protein IAA27 (PAP2) mRNA, complete cds [NM_119052]
A_84_P235303	-8.46734	-3.08191	8.46734	down	AT1G66450	Arabidopsis thaliana cysteine/histidine-rich C1 domain-containing protein (AT1G66450) mRNA, complete cds [NM_105316]
A_84_P23025	-5.38227	-2.42822	5.38227	down	AT2G46780	Arabidopsis thaliana RNA-binding (RRM/RBD/RNP motifs) family protein (AT2G46780) mRNA, complete cds [NM_130244]
A_84_P16192	-2.00509	-1.00367	2.00509	down	NAC032	Arabidopsis thaliana NAC domain containing protein 32 (NAC032) mRNA, complete cds [NM_106394]
A_84_P21419	-6.87907	-2.78221	6.87907	down	AT4G27790	Arabidopsis thaliana Calcium-binding EF hand family protein (AT4G27790) mRNA, complete cds [NM_118917]
A_84_P13657	-11.6535	-3.54269	11.6535	down	AT5MAT	Arabidopsis thaliana HXXXD-type acyl-transferase-like protein (AT5MAT) mRNA, complete cds [NM_113880]
A_84_P796294	-5.02065	-2.32787	5.02065	down		Arabidopsis thaliana [BT025686]
A_84_P767295	-2.45447	-1.29541	2.45447	down
A_84_P13759	-7.38788	-2.88516	7.38788	down	MYB11	Arabidopsis thaliana myb domain protein 11 (MYB11) mRNA, complete cds [NM_116126]
A_84_P586198	-2.33436	-1.22303	2.33436	down	ECB2	Arabidopsis thaliana pentatricopeptide repeat-containing protein (ECB2) mRNA, complete cds [NM_101420]
A_84_P22976	-2.67255	-1.41822	2.67255	down	ABI5	Arabidopsis thaliana protein abscisic acid-insensitive 5 (ABI5) mRNA, complete cds [NM_129185]
A_84_P544829	-4.20478	-2.07203	4.20478	down	AT3G26800	Arabidopsis thaliana uncharacterized protein (AT3G26800) mRNA, complete cds [NM_113592]
A_84_P12276	-3.8901	-1.95981	3.8901	down		Rep: Cyclin-B1-5 - Arabidopsis thaliana (Mouse-ear cress), partial (85%) [TC406087]
A_84_P202108	-2.10168	-1.07154	2.10168	down	AT3G20015	Arabidopsis thaliana aspartyl protease family protein (AT3G20015) mRNA, complete cds [NM_112892]
A_84_P21208	-2.28761	-1.19384	2.28761	down	AT3G29670	Arabidopsis thaliana HXXXD-type acyl-transferase-like protein (AT3G29670) mRNA, complete cds [NM_113889]
A_84_P17182	-2.57978	-1.36725	2.57978	down	GR-RBP6	Arabidopsis thaliana glycine-rich RNA-binding protein 6 (GR-RBP6) mRNA, complete cds [NM_101721]
A_84_P16943	-8.44187	-3.07756	8.44187	down	TSA1	Arabidopsis thaliana TSK-associating protein 1 (TSA1) mRNA, complete cds [NM_179466]
A_84_P801656	-6.76525	-2.75814	6.76525	down		018F05 Infected Arabidopsis Leaf Arabidopsis thaliana cDNA, mRNA sequence [BU634807]
A_84_P20780	-7.72311	-2.94918	7.72311	down	AT1G03495	Arabidopsis thaliana HXXXD-type acyl-transferase-like protein (AT1G03495) mRNA, complete cds [NM_100232]
A_84_P830778	-3.06818	-1.61739	3.06818	down	AT5G14140	Arabidopsis thaliana nucleic acid binding / zinc ion binding protein (AT5G14140) mRNA, complete cds [NM_121418]
A_84_P15811	-7.89721	-2.98134	7.89721	down	LAC10	Arabidopsis thaliana laccase 10 (LAC10) mRNA, complete cds [NM_120197]
A_84_P15769	-2.38127	-1.25173	2.38127	down	AT4G33730	Arabidopsis thaliana putative pathogenesis-related protein (AT4G33730) mRNA, complete cds [NM_119531]
A_84_P836530	-4.4099	-2.14075	4.4099	down	VDD	Arabidopsis thaliana VERDANDI protein (VDD) mRNA, complete cds [NM_121805]
A_84_P843162	-2.10674	-1.07501	2.10674	down		GB
A_84_P262660	-3.5669	-1.83467	3.5669	down	AT2G41130	Arabidopsis thaliana transcription factor bHLH106 (AT2G41130) mRNA, complete cds [NM_129678]
A_84_P582333	-2.79087	-1.48072	2.79087	down	AT4G39190	Arabidopsis thaliana uncharacterized protein (AT4G39190) mRNA, complete cds [NM_120079]
A_84_P162443	-4.7329	-2.24272	4.7329	down	AT5G64510	Arabidopsis thaliana uncharacterized protein (AT5G64510) mRNA, complete cds [NM_125847]
A_84_P800524	-2.62772	-1.39381	2.62772	down	AT3G49550	Arabidopsis thaliana Full-length cDNA Complete sequence from clone GSLTLS10ZD04 of Adult vegetative tissue of strain col-0 of Arabidopsis thaliana (thale cress) [BX823204]
A_84_P787579	-2.15937	-1.11061	2.15937	down	WCRKC2	Arabidopsis thaliana thioredoxin-like 3-2 (WCRKC2) mRNA, complete cds [NM_120508]
A_84_P861607	-8.31932	-3.05647	8.31932	down	NAI2	Arabidopsis thaliana DNA topoisomerase-like protein (NAI2) mRNA, complete cds [NM_112465]
A_84_P22891	-5.78201	-2.53157	5.78201	down	AT1G27870	Arabidopsis thaliana RNase H domain-containing protein (AT1G27870) mRNA, complete cds [NM_102552]
A_84_P19093	-3.34562	-1.74227	3.34562	down	CYP708A3	Arabidopsis thaliana cytochrome P450, family 708, subfamily A, polypeptide 3 (CYP708A3) mRNA, complete cds [NM_106496]
A_84_P790953	-2.33693	-1.22461	2.33693	down	AT3G57210	Arabidopsis thaliana uncharacterized protein (AT3G57210) mRNA, complete cds [NM_115581]
A_84_P14438	-5.82704	-2.54276	5.82704	down	AT2G30690	Arabidopsis thaliana uncharacterized protein (AT2G30690) mRNA, complete cds [NM_128621]
A_84_P844559	-12.547	-3.64927	12.547	down		Rep: At1g34220 - Arabidopsis thaliana (Mouse-ear cress), complete [TC360756]
A_84_P15015	-2.24632	-1.16756	2.24632	down	AT5G55780	Arabidopsis thaliana cysteine/histidine-rich C1 domain-containing protein (AT5G55780) mRNA, complete cds [NM_124960]
A_84_P14785	-10.558	-3.40026	10.558	down	AT4G25160	Arabidopsis thaliana U-box domain-containing protein 35 (AT4G25160) mRNA, complete cds [NM_118648]
A_84_P11557	-3.5412	-1.82424	3.5412	down	AT2G25820	Arabidopsis thaliana ethylene-responsive transcription factor ERF042 (AT2G25820) mRNA, complete cds [NM_128142]
A_84_P16778	-2.4872	-1.31452	2.4872	down	ERL2	Arabidopsis thaliana LRR receptor-like serine/threonine-protein kinase ERL2 (ERL2) mRNA, complete cds [NM_120800]
A_84_P238093	-15.0841	-3.91496	15.0841	down	AT4G24410	Arabidopsis thaliana uncharacterized protein (AT4G24410) mRNA, complete cds [NM_118574]
A_84_P795906	-7.17686	-2.84335	7.17686	down	AT5G46140	Arabidopsis thaliana clone 108981 mRNA sequence [DQ108692]
A_84_P828544	-2.86135	-1.51669	2.86135	down	AT2G04170	Arabidopsis thaliana TRAF-like family protein (AT2G04170) mRNA, complete cds [NM_001124792]
A_84_P18179	-19.3083	-4.27115	19.3083	down	ARI9	Arabidopsis thaliana putative E3 ubiquitin-protein ligase ARI9 (ARI9) mRNA, complete cds [NM_128735]
A_84_P831673	-3.31923	-1.73085	3.31923	down	AT3G52140	Arabidopsis thaliana tetratricopeptide repeat (TPR)-containing protein (AT3G52140) mRNA, complete cds [NM_001203138]
A_84_P70894	-2.6479	-1.40485	2.6479	down	OFP1	Arabidopsis thaliana ovate family protein 1 (OFP1) mRNA, complete cds [NM_120262]
A_84_P794856	-5.34362	-2.41782	5.34362	down	HSD1	BP593918 RAFL15 Arabidopsis thaliana cDNA clone RAFL15-23-O21 3', mRNA sequence [BP593918]
A_84_P14381	-2.57376	-1.36388	2.57376	down	AT1G14490	Arabidopsis thaliana putative AT-hook DNA-binding protein (AT1G14490) mRNA, complete cds [NM_101316]
A_84_P549693	-13.9271	-3.79982	13.9271	down	AT4G31690	Arabidopsis thaliana B3 domain-containing protein REM9 (AT4G31690) mRNA, complete cds [NM_119318]
A_84_P839203	-6.15684	-2.62219	6.15684	down	AT1G70260	Arabidopsis thaliana nodulin MtN21 /EamA-like transporter protein (AT1G70260) mRNA, complete cds [NM_105694]
A_84_P592130	-3.89354	-1.96108	3.89354	down	AT4G33905	Arabidopsis thaliana Peroxisomal membrane 22 kDa (Mpv17/PMP22) family protein (AT4G33905) mRNA, complete cds [NM_119549]
A_84_P825097	-2.13722	-1.09574	2.13722	down	AT4G21910	Arabidopsis thaliana mate efflux domain-containing protein (AT4G21910) mRNA, complete cds [NM_202859]
A_84_P511590	-2.18435	-1.1272	2.18435	down	AT1G07120	Arabidopsis thaliana uncharacterized protein (AT1G07120) mRNA, complete cds [NM_100585]
A_84_P19037	-7.12721	-2.83334	7.12721	down	AT1G63100	Arabidopsis thaliana scarecrow-like protein 28 (AT1G63100) mRNA, complete cds [NM_104988]
A_84_P10567	-4.0685	-2.0245	4.0685	down		GB
A_84_P152468	-7.13759	-2.83544	7.13759	down	AT4G09990	Arabidopsis thaliana uncharacterized protein (AT4G09990) mRNA, complete cds [NM_117067]
A_84_P841048	-2.56549	-1.35923	2.56549	down		GB
A_84_P852295	-2.04371	-1.03119	2.04371	down	ASN1	Arabidopsis thaliana asparagine synthetase [glutamine-hydrolyzing] (ASN1) mRNA, complete cds [NM_180333]
A_84_P23910	-2.88349	-1.52782	2.88349	down	GSTZ2	Arabidopsis thaliana putative glutathione S-transferase zeta-class 2 (GSTZ2) mRNA, complete cds [NM_126295]
A_84_P77119	-4.03264	-2.01173	4.03264	down	EXL1	Arabidopsis thaliana protein exordium like 1 (EXL1) mRNA, complete cds [NM_129068]
A_84_P19973	-5.32594	-2.41304	5.32594	down	CDKB2;1	Arabidopsis thaliana cyclin-dependent kinase B2-1 (CDKB2;1) mRNA, complete cds [NM_106304]
A_84_P12985	-4.48904	-2.16641	4.48904	down	ATCSLA09	Arabidopsis thaliana glucomannan 4-beta-mannosyltransferase 9 (ATCSLA09) mRNA, complete cds [NM_120457]
A_84_P220748	-2.0306	-1.0219	2.0306	down	AT5G56075	Arabidopsis thaliana uncharacterized protein (AT5G56075) mRNA, complete cds [NM_148137]
A_84_P13338	-3.42937	-1.77794	3.42937	down	MYB47	Arabidopsis thaliana myb domain protein 47 (MYB47) mRNA, complete cds [NM_101729]
A_84_P603733	-2.65811	-1.4104	2.65811	down	AT5G05040	Arabidopsis thaliana cystatin/monellin-related protein (AT5G05040) mRNA, complete cds [NM_120586]
A_84_P175541	-4.06583	-2.02355	4.06583	down	DRB5	Arabidopsis thaliana dsRNA-binding protein 5 (DRB5) mRNA, complete cds [NM_123472]
A_84_P23516	-2.13485	-1.09414	2.13485	down	CBF4	Arabidopsis thaliana dehydration-responsive element-binding protein 1D (CBF4) mRNA, complete cds [NM_124578]
A_84_P565270	-5.11666	-2.3552	5.11666	down	AT4G01180	Arabidopsis thaliana XH/XS domain-containing protein (AT4G01180) mRNA, complete cds [NM_116348]
A_84_P850169	-2.49966	-1.32173	2.49966	down	AT5G42210	Arabidopsis thaliana major facilitator protein (AT5G42210) mRNA, complete cds [NM_123586]
A_84_P21231	-3.87154	-1.95291	3.87154	down	AT3G13662	Arabidopsis thaliana Disease resistance-responsive (dirigent-like protein) family protein (AT3G13662) mRNA, complete cds [NM_112213]
A_84_P16338	-4.80313	-2.26397	4.80313	down	AT1G07850	Arabidopsis thaliana clone pENTR221-At1g07850 fringe-like protein (At1g07850) mRNA, complete cds [DQ446236]
A_84_P11153	-4.30552	-2.10619	4.30552	down	AT5G25420	Arabidopsis thaliana putative nucleobase-ascorbate transporter 9 (AT5G25420) mRNA, complete cds [NM_122452]
A_84_P11260	-4.44648	-2.15266	4.44648	down	AT5G61610	Arabidopsis thaliana oleosin-like protein (AT5G61610) mRNA, complete cds [NM_125555]
A_84_P525852	-7.69197	-2.94335	7.69197	down		GB
A_84_P14569	-2.5985	-1.37768	2.5985	down	DOF2	Arabidopsis thaliana Dof zinc finger protein DOF3.1 (DOF2) mRNA, complete cds [NM_113022]
A_84_P200184	-2.06199	-1.04404	2.06199	down	AT4G09490	Arabidopsis thaliana RNase H domain-containing protein (AT4G09490) mRNA, complete cds [NM_117017]
A_84_P545837	-2.71776	-1.44242	2.71776	down	AT4G16015	Arabidopsis thaliana cysteine/histidine-rich C1 domain-containing protein (AT4G16015) mRNA, complete cds [NM_202828]
A_84_P769226	-4.66693	-2.22247	4.66693	down	AT5G17795	Arabidopsis thaliana uncharacterized protein (AT5G17795) mRNA, complete cds [NM_001125770]
A_84_P513074	-2.69675	-1.43122	2.69675	down	AT4G32970	Arabidopsis thaliana uncharacterized protein (AT4G32970) mRNA, complete cds [NM_119451]
A_84_P557031	-8.62717	-3.10889	8.62717	down	AT2G18270	Arabidopsis thaliana uncharacterized protein (AT2G18270) mRNA, complete cds [NM_127385]
A_84_P240415	-3.89273	-1.96078	3.89273	down	AT5G11550	Arabidopsis thaliana ARM repeat-containing protein-like protein (AT5G11550) mRNA, complete cds [NM_121193]
A_84_P20868	-18.7821	-4.23129	18.7821	down	AT1G30740	Arabidopsis thaliana FAD-binding and BBE domain-containing protein (AT1G30740) mRNA, complete cds [NM_102810]
A_84_P804506	-2.5388	-1.34415	2.5388	down	FIM1	AYBHA90TR pooled cDNA populations Arabidopsis thaliana cDNA, mRNA sequence [EG504874]
A_84_P17744	-4.71985	-2.23874	4.71985	down	AT5G13380	Arabidopsis thaliana auxin-responsive GH3 family protein (AT5G13380) mRNA, complete cds [NM_121341]
A_84_P764586	-9.30881	-3.2186	9.30881	down	AT4G22666	Arabidopsis thaliana bifunctional inhibitor/lipid-transfer protein/seed storage 2S albumin-like protein (AT4G22666) mRNA, complete cds [NM_001125560]
A_84_P800114	-5.15524	-2.36604	5.15524	down
A_84_P19992	-2.0824	-1.05825	2.0824	down	AT1G69910	Arabidopsis thaliana protein kinase domain-containing protein (AT1G69910) mRNA, complete cds [NM_105659]
A_84_P825572	-2.18243	-1.12594	2.18243	down	AT1G65040	Arabidopsis thaliana ubiquitin-protein ligase synoviolin (AT1G65040) mRNA, complete cds [NM_179512]
A_84_P18409	-4.76117	-2.25132	4.76117	down	NAC060	Arabidopsis thaliana NAC domain containing protein 60 (NAC060) mRNA, complete cds [NM_114297]
A_84_P789745	-2.49351	-1.31818	2.49351	down	AT2G12462	Arabidopsis thaliana clone asmbl_5315 unknown mRNA sequence [EF182954]
A_84_P820919	-6.79701	-2.7649	6.79701	down
A_84_P305260	-4.9053	-2.29434	4.9053	down		GB
A_84_P569557	-2.08999	-1.0635	2.08999	down	AT3G02930	Arabidopsis thaliana uncharacterized protein (AT3G02930) mRNA, complete cds [NM_111163]
A_84_P19564	-2.48506	-1.31328	2.48506	down	AT4G36180	Arabidopsis thaliana putative LRR receptor-like serine/threonine-protein kinase (AT4G36180) mRNA, complete cds [NM_119785]
A_84_P557562	-6.49979	-2.70039	6.49979	down	AT5G47170	Arabidopsis thaliana uncharacterized protein (AT5G47170) mRNA, complete cds [NM_124088]
A_84_P804439	-5.10124	-2.35085	5.10124	down
A_84_P753069	-5.70364	-2.51188	5.70364	down	RALFL5	Arabidopsis thaliana protein RALF-like 5 (RALFL5) mRNA, complete cds [NM_001084197]
A_84_P10140	-10.119	-3.339	10.119	down	AT5G01280	Arabidopsis thaliana uncharacterized protein (AT5G01280) mRNA, complete cds [NM_120206]
A_84_P763409	-3.03132	-1.59995	3.03132	down
A_84_P591026	-4.79703	-2.26214	4.79703	down	AT3G22770	Arabidopsis thaliana F-box associated ubiquitination effector-like protein (AT3G22770) mRNA, complete cds [NM_113176]
A_84_P768104	-2.39165	-1.25801	2.39165	down	AT5G44973	Arabidopsis thaliana defensin-like protein 285 (AT5G44973) mRNA, complete cds [NM_001036935]
A_84_P12898	-8.19754	-3.03519	8.19754	down	AT4G25790	Arabidopsis thaliana allergen V5/Tpx-1-related family protein (AT4G25790) mRNA, complete cds [NM_118711]
A_84_P511134	-2.43571	-1.28434	2.43571	down	AT3G30580	Arabidopsis thaliana uncharacterized protein (AT3G30580) mRNA, complete cds [NM_113959]
A_84_P10328	-4.82133	-2.26943	4.82133	down	MAF4	Arabidopsis thaliana K-box region and MADS-box transcription factor family protein (MAF4) mRNA, complete cds [NM_001126027]
A_84_P23898	-4.95722	-2.30953	4.95722	down	CYP78A6	Arabidopsis thaliana cytochrome P450, family 78, subfamily A, polypeptide 6 (CYP78A6) mRNA, complete cds [NM_130231]
A_84_P18464	-6.13457	-2.61696	6.13457	down	AT3G56620	Arabidopsis thaliana nodulin MtN21 /EamA-like transporter protein (AT3G56620) mRNA, complete cds [NM_115521]
A_84_P22112	-5.66061	-2.50096	5.66061	down	AT1G53070	Arabidopsis thaliana legume lectin-like protein (AT1G53070) mRNA, complete cds [NM_104186]
A_84_P21473	-3.12191	-1.64243	3.12191	down	BAM5	Arabidopsis thaliana beta-amylase 5 (BAM5) mRNA, complete cds [NM_117609]
A_84_P11410	-7.61282	-2.92843	7.61282	down	ERF14	Arabidopsis thaliana ethylene-responsive transcription factor 14 (ERF14) mRNA, complete cds [NM_100317]
A_84_P15960	-5.81748	-2.54039	5.81748	down	AT5G55370	Arabidopsis thaliana putative long-chain-alcohol O-fatty-acyltransferase 2 (AT5G55370) mRNA, complete cds [NM_124919]
A_84_P587229	-3.92946	-1.97433	3.92946	down	AT1G72080	Arabidopsis thaliana uncharacterized protein (AT1G72080) mRNA, complete cds [NM_105866]
A_84_P249125	-4.78343	-2.25805	4.78343	down	AT1G68500	Arabidopsis thaliana uncharacterized protein (AT1G68500) mRNA, complete cds [NM_105521]
A_84_P13041	-6.10458	-2.60989	6.10458	down	CYP71A14	Arabidopsis thaliana cytochrome P450 71A14 (CYP71A14) mRNA, complete cds [NM_122405]
A_84_P768519	-6.63931	-2.73103	6.63931	down
A_84_P22438	-5.71865	-2.51567	5.71865	down	ANAC026	Arabidopsis thaliana NAC domain containing protein 26 (ANAC026) mRNA, complete cds [NM_104947]
A_84_P518257	-5.2963	-2.40498	5.2963	down	AT3G49070	Arabidopsis thaliana uncharacterized protein (AT3G49070) mRNA, complete cds [NM_114766]
A_84_P609782	-5.50782	-2.46148	5.50782	down	AT3G58330	Arabidopsis thaliana phospholipase-like protein (PEARLI 4) family protein (AT3G58330) mRNA, complete cds [NM_115695]
A_84_P813162	-2.21013	-1.14413	2.21013	down		Rep: Chromosome chr19 scaffold_4, whole genome shotgun sequence - Vitis vinifera (Grape), partial (19%) [TC394638]
A_84_P506004	-3.14463	-1.65289	3.14463	down	AT5G01790	Arabidopsis thaliana uncharacterized protein (AT5G01790) mRNA, complete cds [NM_120257]
A_84_P523663	-4.86997	-2.28391	4.86997	down	AT4G13690	Arabidopsis thaliana uncharacterized protein (AT4G13690) mRNA, complete cds [NM_117443]
A_84_P554019	-4.40782	-2.14007	4.40782	down	NAC097	Arabidopsis thaliana NAC domain containing protein 97 (NAC097) mRNA, complete cds [NM_124460]
A_84_P802722	-5.74123	-2.52136	5.74123	down		AYAJA73TR pooled cDNA populations Arabidopsis thaliana cDNA, mRNA sequence [EG418982]
A_84_P535267	-4.90347	-2.2938	4.90347	down
A_84_P843446	-2.43603	-1.28453	2.43603	down	FLA16	Arabidopsis thaliana fasciclin-like arabinogalactan protein 16 (FLA16) mRNA, complete cds [NM_179922]
A_84_P798475	-2.60538	-1.3815	2.60538	down		AYBEC40TR pooled cDNA populations Arabidopsis thaliana cDNA, mRNA sequence [EG525362]
A_84_P17298	-7.32571	-2.87297	7.32571	down	cycp3;1	Arabidopsis thaliana cyclin-U2-1 (cycp3;1) mRNA, complete cds [NM_130072]
A_84_P789268	-2.35046	-1.23294	2.35046	down	AT3G15010	Arabidopsis thaliana AT3G15010 mRNA, complete cds, clone: RAFL07-12-N01 [AK316731]
A_84_P10711	-7.40781	-2.88905	7.40781	down	JAL23	Arabidopsis thaliana myrosinase-binding protein-like protein (JAL23) mRNA, complete cds [NM_129490]
A_84_P24060	-2.52084	-1.3339	2.52084	down		GB
A_84_P19573	-4.29063	-2.10119	4.29063	down	AT1G48100	Arabidopsis thaliana polygalacturonase (AT1G48100) mRNA, complete cds [NM_103706]
A_84_P552025	-3.45186	-1.78737	3.45186	down	AT4G17000	Arabidopsis thaliana uncharacterized protein (AT4G17000) mRNA, complete cds [NM_117804]
A_84_P294704	-3.15593	-1.65807	3.15593	down	AT1G54010	Arabidopsis thaliana GDSL esterase/lipase (AT1G54010) mRNA, complete cds [NM_104278]
A_84_P140039	-8.98817	-3.16803	8.98817	down	AT4G01245	Arabidopsis thaliana uncharacterized protein (AT4G01245) mRNA, complete cds [NM_148185]
A_84_P579790	-5.63562	-2.49458	5.63562	down	AT5G48510	Arabidopsis thaliana BTB/POZ domain-containing protein (AT5G48510) mRNA, complete cds [NM_124227]
A_84_P12480	-2.22281	-1.15239	2.22281	down	AT1G58160	Arabidopsis thaliana mannose-binding lectin-like protein (AT1G58160) mRNA, complete cds [NM_104597]
A_84_P14513	-6.08662	-2.60564	6.08662	down	ArRABA1h	Arabidopsis thaliana RAB GTPaselike protein A1H (ArRABA1h) mRNA, complete cds [NM_128947]
A_84_P580199	-2.35307	-1.23454	2.35307	down	DML1	Arabidopsis thaliana protein ROS1 (DML1) mRNA, complete cds [NM_129207]
A_84_P80039	-3.4558	-1.78902	3.4558	down
A_84_P18962	-4.34827	-2.12044	4.34827	down	AT1G75550	Arabidopsis thaliana glycine-rich protein (AT1G75550) mRNA, complete cds [NM_106208]
A_84_P11538	-2.03367	-1.02409	2.03367	down	AT1G31490	Arabidopsis thaliana HXXXD-type acyl-transferase-like protein (AT1G31490) mRNA, complete cds [NM_102888]
A_84_P832612	-2.05644	-1.04015	2.05644	down	AT5G65290	Arabidopsis thaliana LMBR1-like membrane protein (AT5G65290) mRNA, complete cds [NM_125927]
A_84_P14582	-2.22131	-1.15141	2.22131	down	AT3G12730	Arabidopsis thaliana myb family transcription factor (AT3G12730) mRNA, complete cds [NM_112109]
A_84_P550010	-5.70525	-2.51229	5.70525	down	AT2G36030	Arabidopsis thaliana uncharacterized protein (AT2G36030) mRNA, complete cds [NM_129162]
A_84_P12978	-2.03208	-1.02296	2.03208	down	CIPK15	Arabidopsis thaliana CBL-interacting serine/threonine-protein kinase 15 (CIPK15) mRNA, complete cds [NM_001036743]
A_84_P750256	-3.46758	-1.79393	3.46758	down
A_84_P759097	-5.81926	-2.54084	5.81926	down
A_84_P13028	-3.29406	-1.71987	3.29406	down	AT5G18430	Arabidopsis thaliana GDSL esterase/lipase (AT5G18430) mRNA, complete cds [NM_121848]
A_84_P17563	-3.31135	-1.72742	3.31135	down	TAR1	Arabidopsis thaliana tryptophan aminotransferase related 1 (TAR1) mRNA, complete cds [NM_102181]
A_84_P727828	-2.01609	-1.01156	2.01609	down	AT1G03940	Arabidopsis thaliana mRNA for hypothetical protein, complete cds, clone: RAFL16-24-N02 [AK228935]
A_84_P753015	-33.0182	-5.04519	33.0182	down	IDL5	Arabidopsis thaliana inflorescence deficient in abscission (IDA)-like 5 protein (IDL5) mRNA, complete cds [NM_001084366]
A_84_P518779	-5.39359	-2.43125	5.39359	down	AT1G47470	Arabidopsis thaliana uncharacterized protein (AT1G47470) mRNA, complete cds [NM_103639]
A_84_P844666	-3.31337	-1.7283	3.31337	down		Rep: Probable mitochondrial saccharopine dehydrogenase At5g39410 - Arabidopsis thaliana (Mouse-ear cress), complete [TC366386]
A_84_P14853	-2.47566	-1.30781	2.47566	down	UGT84A1	Arabidopsis thaliana UDP-glycosyltransferase-like protein (UGT84A1) mRNA, complete cds [NM_117638]
A_84_P17170	-3.35009	-1.7442	3.35009	down	WRKY66	Arabidopsis thaliana putative WRKY transcription factor 66 (WRKY66) mRNA, complete cds [NM_106707]
A_84_P847899	-3.28108	-1.71417	3.28108	down	PFK6	Arabidopsis thaliana 6-phosphofructokinase 6 (PFK6) mRNA, complete cds [NM_119437]
A_84_P11402	-2.37849	-1.25005	2.37849	down	CRT1b	Arabidopsis thaliana calreticulin-2 (CRT1b) mRNA, complete cds [NM_100791]
A_84_P12961	-6.96142	-2.79938	6.96142	down	AO1	Arabidopsis thaliana amine oxidase 1 (AO1) mRNA, complete cds [NM_117580]
A_84_P13912	-2.53351	-1.34114	2.53351	down	TPS02	Arabidopsis thaliana terpene synthase 02 (TPS02) mRNA, complete cds [NM_117774]
A_84_P788285	-2.43461	-1.28369	2.43461	down	AT3G19230	Arabidopsis thaliana Full-length cDNA Complete sequence from clone GSLTPGH48ZC09 of Hormone Treated Callus of strain col-0 of Arabidopsis thaliana (thale cress) [BX816439]
A_84_P21276	-2.60984	-1.38396	2.60984	down	EXPA18	Arabidopsis thaliana expansin A18 (EXPA18) mRNA, complete cds [NM_104976]
A_84_P603331	-2.36404	-1.24125	2.36404	down	AT2G22730	Arabidopsis thaliana major facilitator protein (AT2G22730) mRNA, complete cds [NM_127838]
A_84_P12646	-10.1736	-3.34675	10.1736	down	HDG8	Arabidopsis thaliana homeobox-leucine zipper protein HDG8 (HDG8) mRNA, complete cds [NM_111196]
A_84_P22386	-2.98313	-1.57683	2.98313	down	YUC1	Arabidopsis thaliana YUCCA family monooxygenase (YUC1) mRNA, complete cds [NM_119406]
A_84_P751920	-5.39439	-2.43146	5.39439	down
A_84_P248485	-7.01888	-2.81124	7.01888	down	AT1G50980	Arabidopsis thaliana putative FBD-associated F-box protein (AT1G50980) mRNA, complete cds [NM_103978]
A_84_P229959	-2.39369	-1.25924	2.39369	down	SUMO5	Arabidopsis thaliana small ubiquitin-related modifier 5 (SUMO5) mRNA, complete cds [NM_128836]
A_84_P837591	-26.1129	-4.70669	26.1129	down
A_84_P600521	-7.82644	-2.96836	7.82644	down		Rep: F21D18.22 - Arabidopsis thaliana (Mouse-ear cress), partial (71%) [TC387227]
A_84_P133535	-5.13141	-2.35935	5.13141	down	AT4G01780	Arabidopsis thaliana XH/XS domain-containing protein (AT4G01780) mRNA, complete cds [NM_116408]
A_84_P111332	-2.18489	-1.12756	2.18489	down	AT1G56210	Arabidopsis thaliana heavy-metal-associated domain-containing protein (AT1G56210) mRNA, complete cds [NM_104500]
A_84_P580770	-2.17847	-1.12332	2.17847	down	HEC3	Arabidopsis thaliana transcription factor HEC3 (HEC3) mRNA, complete cds [NM_121012]
A_84_P13101	-2.56974	-1.36162	2.56974	down	AT5G48710	Arabidopsis thaliana putative small ubiquitin-related modifier 4 (AT5G48710) mRNA, complete cds [NM_124248]
A_84_P106252	-3.93652	-1.97692	3.93652	down	HB28	Arabidopsis thaliana homeobox protein 28 (HB28) mRNA, complete cds [NM_114949]
A_84_P87799	-2.67947	-1.42195	2.67947	down		Rep: Genomic DNA, chromosome 5, TAC clone: K19B1 - Arabidopsis thaliana (Mouse-ear cress), partial (94%) [TC400586]
A_84_P55560	-2.8101	-1.49062	2.8101	down	CPUORF47	Arabidopsis thaliana conserved peptide upstream open reading frame 47 (CPUORF47) mRNA, complete cds [NM_001125688]
A_84_P500062	-2.1506	-1.10474	2.1506	down	AT1G13490	Arabidopsis thaliana uncharacterized protein (AT1G13490) mRNA, complete cds [NM_101219]
A_84_P582659	-2.42268	-1.2766	2.42268	down	AT1G30160	Arabidopsis thaliana uncharacterized protein (AT1G30160) mRNA, complete cds [NM_001036036]
A_84_P19357	-4.85676	-2.27999	4.85676	down	XTR8	Arabidopsis thaliana xyloglucan:xyloglucosyl transferase (XTR8) mRNA, complete cds [NM_114368]
A_84_P17194	-2.52032	-1.33361	2.52032	down	AT1G70880	Arabidopsis thaliana polyketide cyclase, dehydrase and lipid transport domain-containing protein (AT1G70880) mRNA, complete cds [NM_105755]
A_84_P589112	-6.62288	-2.72746	6.62288	down	AT2G35612	Arabidopsis thaliana uncharacterized protein (AT2G35612) mRNA, complete cds [NM_201876]
A_84_P16663	-5.18438	-2.37417	5.18438	down	AT4G21820	Arabidopsis thaliana binding / calmodulin binding protein (AT4G21820) mRNA, complete cds [NM_118302]
A_84_P22724	-4.24757	-2.08664	4.24757	down	AT1G22900	Arabidopsis thaliana disease resistance-responsive, dirigent domain-containing protein (AT1G22900) mRNA, complete cds [NM_102137]
A_84_P13362	-2.02709	-1.01941	2.02709	down	AT1G27695	Arabidopsis thaliana glycine-rich protein (AT1G27695) mRNA, complete cds [NM_148489]
A_84_P10975	-2.15703	-1.10905	2.15703	down	GR-RBP2	Arabidopsis thaliana glycine-rich RNA-binding protein 2 (GR-RBP2) mRNA, complete cds [NM_001084917]
A_84_P798088	-7.58029	-2.92225	7.58029	down		AYATS08TF pooled cDNA populations Arabidopsis thaliana cDNA, mRNA sequence [EG484480]
A_84_P759230	-5.49161	-2.45723	5.49161	down		GB
A_84_P843860	-2.25002	-1.16994	2.25002	down		GB
A_84_P785946	-4.50307	-2.17091	4.50307	down	GLP8	Arabidopsis thaliana germin-like protein subfamily 2 member 3 (GLP8) mRNA, complete cds [NM_111467]
A_84_P820122	-6.25463	-2.64492	6.25463	down
A_84_P540652	-7.80109	-2.96368	7.80109	down	TBL19	Arabidopsis thaliana protein trichome birefringence-like 19 (TBL19) mRNA, complete cds [NM_121595]
A_84_P799760	-2.11585	-1.08123	2.11585	down
A_84_P10029	-2.72692	-1.44727	2.72692	down	AT4G13840	Arabidopsis thaliana HXXXD-type acyl-transferase-like protein (AT4G13840) mRNA, complete cds [NM_117458]
A_84_P801581	-5.64924	-2.49806	5.64924	down		014E11AF Infected Arabidopsis Leaf Arabidopsis thaliana cDNA, mRNA sequence [CA781155]
A_84_P19299	-2.16965	-1.11746	2.16965	down	AT3G19300	Arabidopsis thaliana protein kinase family protein (AT3G19300) mRNA, complete cds [NM_112817]
A_84_P766980	-2.90849	-1.54027	2.90849	down	AT5G38920	Arabidopsis thaliana RNase H domain-containing protein (AT5G38920) mRNA, complete cds [NM_123254]
A_84_P855075	-6.62918	-2.72883	6.62918	down		Rep: Venom allergen-like protein 10 - Schistosoma mansoni (Blood fluke), partial (7%) [TC396465]
A_84_P18411	-16.0496	-4.00446	16.0496	down	AT3G44970	Arabidopsis thaliana cytochrome P450 family protein (AT3G44970) mRNA, complete cds [NM_114366]
A_84_P204568	-2.30495	-1.20474	2.30495	down	AT1G54120	Arabidopsis thaliana uncharacterized protein (AT1G54120) mRNA, complete cds [NM_104290]
A_84_P538970	-5.18096	-2.37322	5.18096	down	AT5G48270	Arabidopsis thaliana uncharacterized protein (AT5G48270) mRNA, complete cds [NM_124202]
A_84_P802645	-10.5561	-3.4	10.5561	down	GH9C2	Arabidopsis thaliana endoglucanase 6 (GH9C2) mRNA, complete cds [NM_105114]
A_84_P14286	-2.20526	-1.14095	2.20526	down	AT1G78260	Arabidopsis thaliana RNA recognition motif-containing protein (AT1G78260) mRNA, complete cds [NM_202440]
A_84_P14581	-3.89427	-1.96135	3.89427	down	AT3G27330	Arabidopsis thaliana C3H4 type zinc finger protein (AT3G27330) mRNA, complete cds [NM_113648]
A_84_P543298	-4.8354	-2.27363	4.8354	down	ENODL21	Arabidopsis thaliana early nodulin-like protein 21 (ENODL21) mRNA, complete cds [NM_001085113]
A_84_P22543	-2.54666	-1.3486	2.54666	down	AT5G44830	Arabidopsis thaliana glycoside hydrolase family 28 protein / polygalacturonase (pectinase) family protein (AT5G44830) mRNA, complete cds [NM_123851]
A_84_P862937	-2.2045	-1.14045	2.2045	down		Rep: Probable phospholipid hydroperoxide glutathione peroxidase 6, mitochondrial precursor - Arabidopsis thaliana (Mouse-ear cress), partial (65%) [TC405732]
A_84_P547483	-3.94185	-1.97887	3.94185	down	AT3G27025	Arabidopsis thaliana uncharacterized protein (AT3G27025) mRNA, complete cds [NM_180308]
A_84_P13576	-5.74103	-2.52131	5.74103	down	AT3G10310	Arabidopsis thaliana myosin and kinesin motor and CH domain-containing protein (AT3G10310) mRNA, complete cds [NM_111866]
A_84_P797834	-26.1003	-4.70599	26.1003	down		AYBHB91TR pooled cDNA populations Arabidopsis thaliana cDNA, mRNA sequence [EG468301]
A_84_P199334	-2.54569	-1.34805	2.54569	down	AT1G62050	Arabidopsis thaliana ankyrin repeat-containing protein (AT1G62050) mRNA, complete cds [NM_104886]
A_84_P840256	-2.30993	-1.20785	2.30993	down	AT1G45010	Arabidopsis thaliana TRAM, LAG1 and CLN8 (TLC) lipid-sensing domain containing protein (AT1G45010) mRNA, complete cds [NM_103581]
A_84_P794166	-6.21067	-2.63475	6.21067	down		29-E012740-027-002-J08-T7R MPIZ-ADIS-027 Arabidopsis thaliana cDNA clone MPIZp772J082Q 5-PRIME, mRNA sequence [CB255614]
A_84_P17156	-6.67772	-2.73936	6.67772	down	AtMYB103	Arabidopsis thaliana myb domain protein 103 (AtMYB103) mRNA, complete cds [NM_105065]
A_84_P815053	-7.2011	-2.84822	7.2011	down		Rep: 26S proteasome non-ATPase regulatory subunit 14 - Arabidopsis thaliana (Mouse-ear cress), partial (91%) [TC401458]
A_84_P18032	-2.23539	-1.16052	2.23539	down	AT1G54050	Arabidopsis thaliana HSP20-like chaperone (AT1G54050) mRNA, complete cds [NM_104282]
A_84_P506240	-10.9311	-3.45037	10.9311	down	AT5G39460	Arabidopsis thaliana F-box protein (AT5G39460) mRNA, complete cds [NM_123308]
A_84_P585271	-3.09198	-1.62853	3.09198	down	AT1G49475	Arabidopsis thaliana B3 domain-containing protein (AT1G49475) mRNA, complete cds [NM_148574]
A_84_P18126	-17.4243	-4.12303	17.4243	down	ATLP-1	Arabidopsis thaliana Thaumatin-like protein (ATLP-1) mRNA, complete cds [NM_001035987]
A_84_P74014	-6.69208	-2.74245	6.69208	down	AT3G11340	Arabidopsis thaliana UDP-glycosyltransferase-like protein (AT3G11340) mRNA, complete cds [NM_111968]
A_84_P805764	-2.79324	-1.48194	2.79324	down	AT1G11850	Arabidopsis thaliana uncharacterized protein (AT1G11850) mRNA, complete cds [NM_001084052]
A_84_P757222	-30.436	-4.92771	30.436	down
A_84_P24132	-3.45974	-1.79066	3.45974	down	TT5	Arabidopsis thaliana chalcone--flavonone isomerase 1 (TT5) mRNA, complete cds [NM_115370]
A_84_P100606	-2.29167	-1.1964	2.29167	down	AT1G02810	Arabidopsis thaliana pectinesterase 7 (AT1G02810) mRNA, complete cds [NM_100160]
A_84_P852777	-2.16853	-1.11672	2.16853	down		Rep: S-receptor kinase - Arabidopsis thaliana (Mouse-ear cress), partial (16%) [TC394878]
A_84_P19295	-5.92111	-2.56587	5.92111	down	AT3G18200	Arabidopsis thaliana EamA domain-containing protein (AT3G18200) mRNA, complete cds [NM_112703]
A_84_P19792	-2.89657	-1.53435	2.89657	down	TOE3	Arabidopsis thaliana AP2-like ethylene-responsive transcription factor TOE3 (TOE3) mRNA, complete cds [NM_126118]
A_84_P843174	-5.19901	-2.37824	5.19901	down		GB
A_84_P15180	-5.1417	-2.36224	5.1417	down		GB
A_84_P209948	-2.14923	-1.10382	2.14923	down	AT2G32870	Arabidopsis thaliana TRAF-like family protein (AT2G32870) mRNA, complete cds [NM_128847]
A_84_P505926	-16.6487	-4.05734	16.6487	down	AT4G18080	Arabidopsis thaliana uncharacterized protein (AT4G18080) mRNA, complete cds [NM_117918]
A_84_P807650	-6.10693	-2.61045	6.10693	down
A_84_P809760	-2.06176	-1.04388	2.06176	down	VGDH1	Arabidopsis thaliana pectinesterase 4 (VGDH1) mRNA, complete cds [NM_130271]
A_84_P846379	-5.06659	-2.34102	5.06659	down	AT2G37000	Arabidopsis thaliana transcription factor TCP11 (AT2G37000) mRNA, complete cds [NM_129256]
A_84_P812905	-2.03388	-1.02423	2.03388	down	PCC1	Arabidopsis thaliana pathogen and circadian controlled 1 (PCC1) mRNA, complete cds [NM_113121]
A_84_P850333	-2.02261	-1.01622	2.02261	down		Arabidopsis thaliana mRNA for hypothetical protein, complete cds, clone: RAFL16-06-D14 [AK228717]
A_84_P17610	-2.36228	-1.24018	2.36228	down	SRF8	Arabidopsis thaliana STRUBBELIG-receptor family 8 protein (SRF8) mRNA, complete cds [NM_118334]
A_84_P18588	-2.44075	-1.28733	2.44075	down	DER1	Arabidopsis thaliana derlin-1 (DER1) mRNA, complete cds [NM_119078]
A_84_P156185	-7.60121	-2.92623	7.60121	down	TPS-CIN	Arabidopsis thaliana 1,8-cineole synthase (TPS-CIN) mRNA, complete cds [NM_113485]
A_84_P131626	-4.17072	-2.06029	4.17072	down	TBL30	Arabidopsis thaliana uncharacterized protein (TBL30) mRNA, complete cds [NM_129574]
A_84_P840752	-3.06295	-1.61492	3.06295	down	CYCB1;5	Arabidopsis thaliana cyclin B (CYCB1;5) mRNA, complete cds [NM_103168]
A_84_P23729	-2.13835	-1.0965	2.13835	down	AT1G27620	Arabidopsis thaliana HXXXD-type acyl-transferase-like protein (AT1G27620) mRNA, complete cds [NM_102527]
A_84_P20204	-2.18184	-1.12555	2.18184	down	AT3G01840	Arabidopsis thaliana protein kinase domain-containing protein (AT3G01840) mRNA, complete cds [NM_111050]
A_84_P853708	-3.68225	-1.88059	3.68225	down		Rep: Membrane protein - marine actinobacterium PHSC20C1, partial (10%) [TC395498]
A_84_P598606	-6.22345	-2.63771	6.22345	down	AT1G66490	Arabidopsis thaliana F-box protein (AT1G66490) mRNA, complete cds [NM_105320]
A_84_P12012	-2.928	-1.54992	2.928	down	SNRK2.7	Arabidopsis thaliana serine/threonine-protein kinase SRK2F (SNRK2.7) mRNA, complete cds [NM_120165]
A_84_P765721	-3.14141	-1.65141	3.14141	down	AT4G06688	Arabidopsis thaliana uncharacterized protein (AT4G06688) mRNA, complete cds [NM_178998]
A_84_P787247	-2.93653	-1.55411	2.93653	down	AGL53	42-L020099-065-001-B06-SeLB MPIZ-ADIS-065d Arabidopsis thaliana cDNA clone 001-B06, mRNA sequence [DR750700]
A_84_P818948	-2.14634	-1.10188	2.14634	down
A_84_P22701	-2.28896	-1.19469	2.28896	down	AT1G23500	Arabidopsis thaliana GDSL esterase/lipase (AT1G23500) mRNA, complete cds [NM_102199]
A_84_P768708	-3.34066	-1.74013	3.34066	down	AT5G01210	Arabidopsis thaliana Full-length cDNA Complete sequence from clone GSLTLS71ZC09 of Adult vegetative tissue of strain col-0 of Arabidopsis thaliana (thale cress) [BX820075]
A_84_P763212	-2.12844	-1.0898	2.12844	down
A_84_P863732	-2.31661	-1.21201	2.31661	down	AT1G54260	Arabidopsis thaliana winged-helix DNA-binding transcription factor family protein (AT1G54260) mRNA, complete cds [NM_104304]
A_84_P16827	-6.59157	-2.72062	6.59157	down	AT5G26070	Arabidopsis thaliana hydroxyproline-rich glycoprotein family protein (AT5G26070) mRNA, complete cds [NM_122508]
A_84_P768504	-11.6216	-3.53874	11.6216	down	AT5G63063	Arabidopsis thaliana Plant thionin family protein (AT5G63063) mRNA, complete cds [NM_001085315]
A_84_P18549	-3.88648	-1.95846	3.88648	down	TSF	Arabidopsis thaliana protein TWIN SISTER of FT (TSF) mRNA, complete cds [NM_118156]
A_84_P11135	-4.40699	-2.13979	4.40699	down	AT5G17700	Arabidopsis thaliana mate efflux domain-containing protein (AT5G17700) mRNA, complete cds [NM_121776]
A_84_P575563	-2.10439	-1.0734	2.10439	down	AT1G51970	Arabidopsis thaliana uncharacterized protein (AT1G51970) mRNA, complete cds [NM_104078]
A_84_P733519	-5.97942	-2.58001	5.97942	down	AT5G44265	Arabidopsis thaliana non-specific lipid-transfer protein 13 (AT5G44265) mRNA, complete cds [NM_001085238]
A_84_P20323	-6.02535	-2.59105	6.02535	down	DIN11	Arabidopsis thaliana 2-oxoglutarate-Fe(II)-dependent oxygenase domain-containing protein (DIN11) mRNA, complete cds [NM_114822]
A_84_P21947	-2.65408	-1.40821	2.65408	down	CYCA1;1	Arabidopsis thaliana cyclin-A1-1 (CYCA1;1) mRNA, complete cds [NM_103537]
A_84_P836411	-2.03384	-1.02421	2.03384	down	AT4G14760	Arabidopsis thaliana kinase interacting-like protein (AT4G14760) mRNA, complete cds [NM_117561]
A_84_P863147	-3.23662	-1.69449	3.23662	down
A_84_P12733	-2.09021	-1.06365	2.09021	down	AT3G42830	Arabidopsis thaliana RING-box protein 1 (AT3G42830) mRNA, complete cds [NM_114151]
A_84_P802752	-2.39095	-1.25758	2.39095	down		AYAIF30TF pooled cDNA populations Arabidopsis thaliana cDNA, mRNA sequence [EG424182]
A_84_P823170	-4.46579	-2.15892	4.46579	down	AT4G35160	Arabidopsis thaliana O-methyltransferase family 2 protein (AT4G35160) mRNA, complete cds [NM_119682]
A_84_P21972	-6.25693	-2.64545	6.25693	down	PRS	Arabidopsis thaliana WUSCHEL-related homeobox 3 (PRS) mRNA, complete cds [NM_128422]
A_84_P841334	-2.06738	-1.04781	2.06738	down	AT3G31950	Arabidopsis thaliana uncharacterized protein (AT3G31950) mRNA, complete cds [NM_114017]
A_84_P20730	-2.11018	-1.07737	2.11018	down	MYB53	Arabidopsis thaliana myb domain protein 53 (MYB53) mRNA, complete cds [NM_125921]
A_84_P22594	-14.02	-3.80942	14.02	down	LAC16	Arabidopsis thaliana laccase 16 (LAC16) mRNA, complete cds [NM_125281]
A_84_P10871	-2.90932	-1.54068	2.90932	down	AT3G50280	Arabidopsis thaliana uncharacterized acetyltransferase (AT3G50280) mRNA, complete cds [NM_114888]
A_84_P861057	-3.10508	-1.63463	3.10508	down	NRT1.1	Arabidopsis thaliana nitrate transporter 1.1 (NRT1.1) mRNA, complete cds [NM_101083]
A_84_P727938	-2.13265	-1.09265	2.13265	down		GB
A_84_P577086	-2.68379	-1.42427	2.68379	down	AT5G38270	Arabidopsis thaliana F-box protein (AT5G38270) mRNA, complete cds [NM_123188]
A_84_P796261	-2.77754	-1.47381	2.77754	down	IRX1	AV556675 Arabidopsis thaliana green siliques Columbia Arabidopsis thaliana cDNA clone SQ049e09F 3', mRNA sequence [AV556675]
A_84_P12683	-2.56694	-1.36005	2.56694	down	CPuORF11	Arabidopsis thaliana S-adenosylmethionine decarboxylase-like protein (CPuORF11) mRNA, complete cds [NM_001125225]
A_84_P15190	-2.07722	-1.05466	2.07722	down	AT1G04330	Arabidopsis thaliana uncharacterized protein (AT1G04330) mRNA, complete cds [NM_100313]
A_84_P716084	-2.82551	-1.49851	2.82551	down		Rep: Histone-lysine N-methyltransferase ATXR2 - Arabidopsis thaliana (Mouse-ear cress), complete [TC403089]
A_84_P12132	-3.05415	-1.61077	3.05415	down	PUB15	Arabidopsis thaliana U-box domain-containing protein 15 (PUB15) mRNA, complete cds [NM_123599]
A_84_P731992	-5.88608	-2.55731	5.88608	down		Arabidopsis thaliana clone RAFL07-14-K02 mRNA sequence [AY054471]
A_84_P147418	-9.33914	-3.22329	9.33914	down	UVI4-LIKE	Arabidopsis thaliana UV-B-insensitive 4-like protein (UVI4-LIKE) mRNA, complete cds [NM_115648]
A_84_P525609	-3.56697	-1.8347	3.56697	down	AT5G35870	Arabidopsis thaliana uncharacterized protein (AT5G35870) mRNA, complete cds [NM_122978]
A_84_P13781	-8.01556	-3.0028	8.01556	down	AT1G23340	Arabidopsis thaliana uncharacterized protein (AT1G23340) mRNA, complete cds [NM_202164]
A_84_P153598	-5.2624	-2.39572	5.2624	down	SDH2-3	Arabidopsis thaliana succinate dehydrogenase [ubiquinone] iron-sulfur subunit 3 (SDH2-3) mRNA, complete cds [NM_148160]
A_84_P553697	-4.34312	-2.11873	4.34312	down	AT3G48220	Arabidopsis thaliana uncharacterized protein (AT3G48220) mRNA, complete cds [NM_114692]
A_84_P10400	-5.4037	-2.43395	5.4037	down	AT1G69080	Arabidopsis thaliana adenine nucleotide alpha hydrolases-like protein (AT1G69080) mRNA, complete cds [NM_105578]
A_84_P798810	-6.34475	-2.66556	6.34475	down		AYBIF93TR pooled cDNA populations Arabidopsis thaliana cDNA, mRNA sequence [EG512373]
A_84_P856326	-2.3028	-1.20339	2.3028	down
A_84_P550058	-6.08172	-2.60448	6.08172	down	RGF7	Arabidopsis thaliana uncharacterized protein (RGF7) mRNA, complete cds [NM_111091]
A_84_P20285	-5.80514	-2.53733	5.80514	down	AT3G13660	Arabidopsis thaliana disease resistance-responsive, dirigent domain-containing protein (AT3G13660) mRNA, complete cds [NM_112212]
A_84_P22100	-2.5818	-1.36837	2.5818	down	RLP33	Arabidopsis thaliana receptor like protein 33 (RLP33) mRNA, complete cds [NM_111439]
A_84_P833642	-3.19354	-1.67516	3.19354	down	SUS4	Arabidopsis thaliana sucrose synthase 4 (SUS4) mRNA, complete cds [NM_114187]
A_84_P10931	-2.03466	-1.02479	2.03466	down	UNE10	Arabidopsis thaliana transcription factor UNE10 (UNE10) mRNA, complete cds [NM_116222]
A_84_P23433	-2.00371	-1.00267	2.00371	down	AT1G49570	Arabidopsis thaliana peroxidase 10 (AT1G49570) mRNA, complete cds [NM_103845]
A_84_P12672	-3.54896	-1.8274	3.54896	down	AT3G15680	Arabidopsis thaliana Ran BP2/NZF zinc finger-like protein (AT3G15680) mRNA, complete cds [NM_112438]
A_84_P201458	-2.59772	-1.37724	2.59772	down	AT5G25230	Arabidopsis thaliana elongation factor EF-2 (AT5G25230) mRNA, complete cds [NM_122432]
A_84_P15597	-2.30504	-1.20479	2.30504	down	HEC2	Arabidopsis thaliana transcription factor HEC2 (HEC2) mRNA, complete cds [NM_114893]
A_84_P19164	-2.29062	-1.19574	2.29062	down	BRL2	Arabidopsis thaliana serine/threonine-protein kinase BRI1-like 2 (BRL2) mRNA, complete cds [NM_126256]
A_84_P752822	-5.77643	-2.53018	5.77643	down	AT1G69828	Arabidopsis thaliana putative defensin-like protein 36 (AT1G69828) mRNA, complete cds [NM_001036182]
A_84_P18442	-5.22578	-2.38565	5.22578	down	chx28	Arabidopsis thaliana cation/H(+) antiporter 28 (chx28) mRNA, complete cds [NM_115067]
A_84_P542422	-6.02431	-2.5908	6.02431	down	AT5G17340	Arabidopsis thaliana Putative membrane lipoprotein (AT5G17340) mRNA, complete cds [NM_121740]
A_84_P14857	-2.13533	-1.09446	2.13533	down	AT4G16750	Arabidopsis thaliana ethylene-responsive transcription factor ERF039 (AT4G16750) mRNA, complete cds [NM_117777]
A_84_P18249	-2.41987	-1.27493	2.41987	down	SBE2.1	Arabidopsis thaliana 1,4-alpha-glucan branching enzyme (SBE2.1) mRNA, complete cds [NM_129196]
A_84_P767799	-3.42198	-1.77483	3.42198	down	AT5G23910	Arabidopsis thaliana ATP binding microtubule motor family protein (AT5G23910) mRNA, complete cds [NM_122296]
A_84_P17490	-2.05287	-1.03764	2.05287	down	AT3G50650	Arabidopsis thaliana scarecrow-like protein 7 (AT3G50650) mRNA, complete cds [NM_114925]
A_84_P20587	-2.31245	-1.20942	2.31245	down	HB-3	Arabidopsis thaliana homeobox-leucine zipper protein HAT7 (HB-3) mRNA, complete cds [NM_121519]
A_84_P12388	-2.13835	-1.0965	2.13835	down	AT1G11410	Arabidopsis thaliana putative S-locus lectin protein kinase (AT1G11410) mRNA, complete cds [NM_101014]
A_84_P13021	-2.99014	-1.58021	2.99014	down	SK13	Arabidopsis thaliana Shaggy-related protein kinase epsilon (SK13) mRNA, complete cds [NM_121468]
A_84_P850706	-4.29115	-2.10137	4.29115	down	ACO2	Arabidopsis thaliana aconitase 2 (ACO2) mRNA, complete cds [NM_118831]
A_84_P737204	-3.19878	-1.67752	3.19878	down	AT2G05632	Arabidopsis thaliana uncharacterized protein (AT2G05632) mRNA, complete cds [NM_001124806]
A_84_P525626	-7.58852	-2.92382	7.58852	down	AT5G42610	Arabidopsis thaliana uncharacterized protein (AT5G42610) mRNA, complete cds [NM_123625]
A_84_P787882	-2.07978	-1.05643	2.07978	down	AT1G65920	Arabidopsis thaliana Regulator of chromosome condensation (RCC1) family with FYVE zinc finger domain (AT1G65920) mRNA, complete cds [NM_105264]
A_84_P533825	-3.06732	-1.61698	3.06732	down	AT1G23935	Arabidopsis thaliana uncharacterized protein (AT1G23935) mRNA, complete cds [NM_202174]
A_84_P269350	-2.05964	-1.04239	2.05964	down	XW6	Arabidopsis thaliana 40S ribosomal protein S2-1 (XW6) mRNA, complete cds [NM_104618]
A_84_P582757	-2.25973	-1.17615	2.25973	down	AT1G70950	Arabidopsis thaliana TPX2 (targeting protein for Xklp2) protein family (AT1G70950) mRNA, complete cds [NM_105763]
A_84_P20925	-2.3314	-1.2212	2.3314	down	WRKY67	Arabidopsis thaliana putative WRKY transcription factor 67 (WRKY67) mRNA, complete cds [NM_105326]
A_84_P581112	-2.19654	-1.13523	2.19654	down	AT2G42150	Arabidopsis thaliana DNA-binding bromodomain-containing protein (AT2G42150) mRNA, complete cds [NM_129778]
A_84_P849839	-2.37164	-1.24588	2.37164	down	AT1G49475	Arabidopsis thaliana B3 domain-containing protein (AT1G49475) mRNA, complete cds [NM_148574]
A_84_P769343	-6.55041	-2.71158	6.55041	down	AT5G18037	Arabidopsis thaliana DNA binding protein (AT5G18037) mRNA, complete cds [NM_001125772]
A_84_P10112	-2.67189	-1.41786	2.67189	down	EDA40	Arabidopsis thaliana Zinc finger (C3HC4-type RING finger) family protein (EDA40) mRNA, complete cds [NM_119950]
A_84_P13270	-10.7141	-3.42144	10.7141	down	AT1G70220	Arabidopsis thaliana anticodon-binding domain-containing protein (AT1G70220) mRNA, complete cds [NM_105690]
A_84_P525832	-2.59858	-1.37772	2.59858	down	AT1G28135	Arabidopsis thaliana uncharacterized protein (AT1G28135) mRNA, complete cds [NM_102579]
A_84_P13655	-2.56415	-1.35848	2.56415	down	ZCF125	Arabidopsis thaliana P-loop containing nucleoside triphosphate hydrolase-like protein (ZCF125) mRNA, complete cds [NM_001124045]
A_84_P759912	-2.2345	-1.15995	2.2345	down	AT3G43570	Arabidopsis thaliana GDSL esterase/lipase (AT3G43570) mRNA, complete cds [NM_114225]
A_84_P18787	-2.0269	-1.01927	2.0269	down	AT5G52250	Arabidopsis thaliana transducin/WD40 domain-containing protein (AT5G52250) mRNA, complete cds [NM_124604]
A_84_P10466	-2.20994	-1.144	2.20994	down	GLP7	Arabidopsis thaliana germin-like protein subfamily 1 member 1 (GLP7) mRNA, complete cds [NM_100920]
A_84_P14372	-5.64835	-2.49783	5.64835	down	AT1G31710	Arabidopsis thaliana putative copper amine oxidase (AT1G31710) mRNA, complete cds [NM_102906]
A_84_P763354	-2.49554	-1.31935	2.49554	down
A_84_P787170	-2.52576	-1.33671	2.52576	down	AT5G47380	Arabidopsis thaliana uncharacterized protein (AT5G47380) mRNA, complete cds [NM_124109]
A_84_P134705	-2.02354	-1.01688	2.02354	down	AT5G24230	Arabidopsis thaliana lipase class 3-related protein (AT5G24230) mRNA, complete cds [NM_122329]
A_84_P266180	-3.0799	-1.62288	3.0799	down	AT2G20595	Arabidopsis thaliana uncharacterized protein (AT2G20595) mRNA, complete cds [NM_127621]
A_84_P592920	-5.7808	-2.53127	5.7808	down	AT4G01390	Arabidopsis thaliana TRAF-like family protein (AT4G01390) mRNA, complete cds [NM_116369]
A_84_P54910	-2.84822	-1.51006	2.84822	down		Rep: E3 ubiquitin-protein ligase BRE1-like 1 - Arabidopsis thaliana (Mouse-ear cress), partial (28%) [TC378941]
A_84_P11819	-2.06626	-1.04702	2.06626	down	UGT72E1	Arabidopsis thaliana coniferyl-alcohol glucosyltransferase (UGT72E1) mRNA, complete cds [NM_114934]
A_84_P13832	-4.53481	-2.18104	4.53481	down	AT4G23340	Arabidopsis thaliana oxidoreductase, 2OG-Fe(II) oxygenase family protein (AT4G23340) mRNA, complete cds [NM_202866]
A_84_P758168	-3.41082	-1.77012	3.41082	down	AT2G02026	Arabidopsis thaliana uncharacterized protein (AT2G02026) mRNA, complete cds [NM_001124780]
A_84_P841862	-2.42349	-1.27709	2.42349	down	AT5G53710	Arabidopsis thaliana uncharacterized protein (AT5G53710) mRNA, complete cds [NM_124750]
A_84_P17679	-2.61151	-1.38488	2.61151	down	AT4G38660	Arabidopsis thaliana pathogenesis-related thaumatin-like protein (AT4G38660) mRNA, complete cds [NM_120027]
A_84_P606494	-2.20311	-1.13954	2.20311	down	GDU7	Arabidopsis thaliana glutamine dumper 7 (GDU7) mRNA, complete cds [NM_123238]
A_84_P831408	-3.26537	-1.70725	3.26537	down	AT4G30830	Arabidopsis thaliana uncharacterized protein (AT4G30830) mRNA, complete cds [NM_119230]
A_84_P558950	-7.38185	-2.88398	7.38185	down	AT3G17130	Arabidopsis thaliana plant invertase/pectin methylesterase inhibitor domain-containing protein (AT3G17130) mRNA, complete cds [NM_112589]
A_84_P309153	-5.03627	-2.33236	5.03627	down	AT4G00920	Arabidopsis thaliana COP1-interacting protein-like protein (AT4G00920) mRNA, complete cds [NM_116319]
A_84_P12905	-5.20539	-2.38001	5.20539	down	AT4G27250	Arabidopsis thaliana Rossmann-fold NAD(P)-binding domain-containing protein (AT4G27250) mRNA, complete cds [NM_118859]
A_84_P586578	-2.02325	-1.01668	2.02325	down	PCC1	Arabidopsis thaliana pathogen and circadian controlled 1 (PCC1) mRNA, complete cds [NM_113121]
A_84_P76404	-7.19664	-2.84732	7.19664	down	UNE11	Arabidopsis thaliana unfertilized embryo sac 11 protein (UNE11) mRNA, complete cds [NM_116225]
A_84_P533182	-2.14655	-1.10202	2.14655	down	AT2G37380	Arabidopsis thaliana uncharacterized protein (AT2G37380) mRNA, complete cds [NM_129293]
A_84_P856130	-7.69443	-2.94381	7.69443	down	AT5G39890	Arabidopsis thaliana uncharacterized protein (AT5G39890) mRNA, complete cds [NM_123352]
A_84_P20087	-3.51466	-1.81338	3.51466	down	CKI1	Arabidopsis thaliana histidine kinase CKI1 (CKI1) mRNA, complete cds [NM_130311]
A_84_P20256	-2.40953	-1.26875	2.40953	down	MYB10	Arabidopsis thaliana myb domain protein 10 (MYB10) mRNA, complete cds [NM_112118]
A_84_P798193	-4.5275	-2.17871	4.5275	down	AT2G06541	Arabidopsis thaliana TTF-type zinc finger protein with HAT dimerisation domain (AT2G06541) mRNA, complete cds [NM_001161028]
A_84_P14339	-3.86967	-1.95221	3.86967	down	MLP165	Arabidopsis thaliana MLP-like protein 165 (MLP165) mRNA, complete cds [NM_103224]
A_84_P16271	-10.9764	-3.45633	10.9764	down	DR4	Arabidopsis thaliana drought-repressed 4 protein (DR4) mRNA, complete cds [NM_105993]
A_84_P200454	-3.19458	-1.67562	3.19458	down	PDLP6	Arabidopsis thaliana cysteine-rich repeat secretory protein 12 (PDLP6) mRNA, complete cds [NM_201665]
A_84_P820416	-3.12939	-1.64588	3.12939	down
A_84_P21154	-2.05914	-1.04204	2.05914	down	AT1G01390	Arabidopsis thaliana hydroquinone glucosyltransferase (AT1G01390) mRNA, complete cds [NM_100021]
A_84_P568326	-2.42379	-1.27726	2.42379	down	AT1G09812	Arabidopsis thaliana uncharacterized protein (AT1G09812) mRNA, complete cds [NM_148452]
A_84_P17586	-2.19378	-1.13342	2.19378	down	AT4G12280	Arabidopsis thaliana copper amine oxidase family protein (AT4G12280) mRNA, complete cds [NM_117298]
A_84_P23145	-5.70002	-2.51097	5.70002	down	AT3G45950	Arabidopsis thaliana Pre-mRNA splicing Prp18-interacting factor (AT3G45950) mRNA, complete cds [NM_114464]
A_84_P11318	-3.89274	-1.96078	3.89274	down	MLP168	Arabidopsis thaliana MLP-like protein 168 (MLP168) mRNA, complete cds [NM_103228]
A_84_P850790	-2.8437	-1.50777	2.8437	down
A_84_P310563	-2.00976	-1.00703	2.00976	down	AT5G51795	Arabidopsis thaliana DNA/RNA-binding protein Kin17, conserved region-containing protein (AT5G51795) mRNA, complete cds [NM_148118]
A_84_P178514	-2.03763	-1.02689	2.03763	down	AT1G22030	Arabidopsis thaliana uncharacterized protein (AT1G22030) mRNA, complete cds [NM_102053]
A_84_P10148	-2.04628	-1.033	2.04628	down	AT5G03270	Arabidopsis thaliana putative cytokinin riboside 5'-monophosphate phosphoribohydrolase LOG6 (AT5G03270) mRNA, complete cds [NM_120405]
A_84_P755684	-2.13088	-1.09145	2.13088	down
A_84_P153835	-2.59063	-1.3733	2.59063	down	MEE3	Arabidopsis thaliana maternal effect embryo arrest 3 protein (MEE3) mRNA, complete cds [NM_127736]
A_84_P11040	-2.2507	-1.17038	2.2507	down	HB-8	Arabidopsis thaliana homeobox-leucine zipper protein ATHB-8 (HB-8) mRNA, complete cds [NM_119441]
A_84_P796069	-2.19812	-1.13627	2.19812	down	AT4G01670	Arabidopsis thaliana uncharacterized protein (AT4G01670) mRNA, complete cds [NM_116397]
A_84_P93029	-2.1321	-1.09227	2.1321	down	HB23	Arabidopsis thaliana homeobox protein 23 (HB23) mRNA, complete cds [NM_123338]
A_84_P22656	-6.91867	-2.79049	6.91867	down	AGP31	Arabidopsis thaliana arabinogalactan protein 31 (AGP31) mRNA, complete cds [NM_102594]
A_84_P10203	-2.6726	-1.41824	2.6726	down	AT5G24390	Arabidopsis thaliana RabGAP/TBC domain-containing protein (AT5G24390) mRNA, complete cds [NM_122347]
A_84_P123842	-2.1581	-1.10976	2.1581	down	AT4G25600	Arabidopsis thaliana Oxoglutarate/iron-dependent oxygenase (AT4G25600) mRNA, complete cds [NM_118692]
A_84_P23348	-3.91243	-1.96806	3.91243	down	AT4G36230	Arabidopsis thaliana uncharacterized protein (AT4G36230) mRNA, complete cds [NM_119791]
A_84_P834687	-4.96747	-2.31251	4.96747	down	AT2G39850	Arabidopsis thaliana subtilisin-like serine protease (AT2G39850) mRNA, complete cds [NM_129544]
A_84_P278320	-2.14289	-1.09956	2.14289	down	AT4G38060	Arabidopsis thaliana uncharacterized protein (AT4G38060) mRNA, complete cds [NM_202973]
A_84_P570804	-2.49868	-1.32116	2.49868	down	RIC4	Arabidopsis thaliana ROP-interactive CRIB motif-containing protein 4 (RIC4) mRNA, complete cds [NM_121654]
A_84_P567922	-2.4193	-1.27459	2.4193	down	AT3G59250	Arabidopsis thaliana F-box/LRR-repeat protein (AT3G59250) mRNA, complete cds [NM_115787]
A_84_P13489	-2.29249	-1.19691	2.29249	down	CYCB1;4	Arabidopsis thaliana cyclin-B1-4 (CYCB1;4) mRNA, complete cds [NM_128233]
A_84_P18353	-2.19029	-1.13112	2.19029	down	ATCAD4	Arabidopsis thaliana cinnamyl alcohol dehydrogenase 4 (ATCAD4) mRNA, complete cds [NM_112832]
A_84_P146129	-2.08596	-1.06071	2.08596	down	AT3G25670	Arabidopsis thaliana leucine-rich repeat-containing protein (AT3G25670) mRNA, complete cds [NM_113466]
A_84_P751343	-2.46425	-1.30115	2.46425	down		Arabidopsis thaliana unknown protein mRNA, complete cds [AY057670]
A_84_P829521	-3.65972	-1.87173	3.65972	down	AT2G36570	Arabidopsis thaliana leucine-rich repeat protein kinase-like protein (AT2G36570) mRNA, complete cds [NM_129213]
A_84_P764077	-11.7495	-3.55453	11.7495	down	CPL3	Arabidopsis thaliana CAPRICE-like MYB3 (CPL3) mRNA, complete cds [NM_001036490]
A_84_P17367	-5.3909	-2.43053	5.3909	down	AT3G10580	Arabidopsis thaliana myb family transcription factor (AT3G10580) mRNA, complete cds [NM_111894]
A_84_P512308	-5.09581	-2.34931	5.09581	down	SRS8	Arabidopsis thaliana SHI-related sequence 8 (SRS8) mRNA, complete cds [NM_122845]
A_84_P788639	-2.26214	-1.17769	2.26214	down	AT3G03770	Arabidopsis thaliana leucine-rich repeat protein kinase-like protein (AT3G03770) mRNA, complete cds [NM_111248]
A_84_P757994	-2.75504	-1.46208	2.75504	down	RL4	Arabidopsis thaliana RAD-like 4 protein (RL4) mRNA, complete cds [NM_001084443]
A_84_P859188	-2.45641	-1.29655	2.45641	down		Rep: 60S ribosomal protein L6 - Vitis vinifera (Grape), partial (63%) [TC399215]
A_84_P20061	-4.05403	-2.01936	4.05403	down	AT2G43580	Arabidopsis thaliana chitinase-like protein (AT2G43580) mRNA, complete cds [NM_129920]
A_84_P567982	-3.50077	-1.80767	3.50077	down	BAM5	Arabidopsis thaliana beta-amylase 5 (BAM5) mRNA, complete cds [NM_117609]
A_84_P796111	-4.15984	-2.05653	4.15984	down
A_84_P93509	-2.31224	-1.20929	2.31224	down	AT3G03700	Arabidopsis thaliana Plasma-membrane choline transporter family protein (AT3G03700) mRNA, complete cds [NM_111241]
A_84_P757961	-2.86137	-1.5167	2.86137	down	AT2G35765	Arabidopsis thaliana uncharacterized protein (AT2G35765) mRNA, complete cds [NM_001084541]
A_84_P104236	-2.21158	-1.14508	2.21158	down	MIF1	Arabidopsis thaliana mini zinc finger 1 (MIF1) mRNA, complete cds [NM_106124]
A_84_P16363	-2.15447	-1.10733	2.15447	down		GB
A_84_P10928	-2.05232	-1.03726	2.05232	down	AAO2	Arabidopsis thaliana aldehyde oxidase 2 (AAO2) mRNA, complete cds [NM_114228]
A_84_P15331	-2.7744	-1.47218	2.7744	down	AT2G43620	Arabidopsis thaliana chitinase-like protein (AT2G43620) mRNA, complete cds [NM_129924]
A_84_P22429	-3.3321	-1.73643	3.3321	down	GATA19	Arabidopsis thaliana GATA transcription factor 19 (GATA19) mRNA, complete cds [NM_119825]
A_84_P764560	-2.22126	-1.15138	2.22126	down	AT4G03505	Arabidopsis thaliana uncharacterized protein (AT4G03505) mRNA, complete cds [NM_001036505]
A_84_P13458	-2.22491	-1.15375	2.22491	down	AT2G23950	Arabidopsis thaliana putative LRR receptor-like serine/threonine-protein kinase (AT2G23950) mRNA, complete cds [NM_127957]
A_84_P54670	-2.22242	-1.15213	2.22242	down	AT2G35760	Arabidopsis thaliana uncharacterized protein (AT2G35760) mRNA, complete cds [NM_129134]
A_84_P765951	-2.60624	-1.38197	2.60624	down	AT4G38120	Arabidopsis thaliana armadillo/beta-catenin-like repeat-containing protein (AT4G38120) mRNA, complete cds [NM_001125665]
A_84_P765690	-5.91195	-2.56363	5.91195	down	AT4G12731	Arabidopsis thaliana uncharacterized protein (AT4G12731) mRNA, complete cds [NM_001125501]
A_84_P13548	-3.59774	-1.84709	3.59774	down	HAI2	Arabidopsis thaliana protein phosphatase 2C 3 (HAI2) mRNA, complete cds [NM_100617]
A_84_P855388	-2.54555	-1.34798	2.54555	down
A_84_P788452	-8.23926	-3.04251	8.23926	down	AT2G20835	AU229802 RAFL17 Arabidopsis thaliana cDNA clone RAFL17-44-I06 3', mRNA sequence [AU229802]
A_84_P24038	-5.38715	-2.42952	5.38715	down	AT3G29260	Arabidopsis thaliana Rossmann-fold NAD(P)-binding domain-containing protein (AT3G29260) mRNA, complete cds [NM_113850]
A_84_P822144	-2.09404	-1.06629	2.09404	down	4CL3	Arabidopsis thaliana 4-coumarate--CoA ligase 3 (4CL3) mRNA, complete cds [NM_105180]
A_84_P797475	-3.19587	-1.67621	3.19587	down	AT3G18282	Arabidopsis thaliana uncharacterized protein (AT3G18282) mRNA, complete cds [NM_001161152]
A_84_P21524	-2.93978	-1.55571	2.93978	down	NDL2	Arabidopsis thaliana protein N-MYC downregulated-like 2 (NDL2) mRNA, complete cds [NM_121217]
A_84_P764379	-6.36426	-2.66999	6.36426	down
A_84_P594594	-3.88091	-1.95639	3.88091	down	AT3G22415	Arabidopsis thaliana uncharacterized protein (AT3G22415) mRNA, complete cds [NM_202624]
A_84_P54180	-2.42282	-1.27669	2.42282	down	SAH7	Arabidopsis thaliana protein SAH7 (SAH7) mRNA, complete cds [NM_116938]
A_84_P10636	-2.83411	-1.50289	2.83411	down	AT2G47670	Arabidopsis thaliana plant invertase/pectin methylesterase inhibitor domain-containing protein (AT2G47670) mRNA, complete cds [NM_130335]
A_84_P11444	-5.3772	-2.42685	5.3772	down	TLP8	Arabidopsis thaliana Tubby-like protein 8 (TLP8) mRNA, complete cds [NM_001035976]
A_84_P546421	-2.12198	-1.08541	2.12198	down	UBA1A	Arabidopsis thaliana UBP1 interacting protein 1a (UBA1A) mRNA, complete cds [NM_179690]
A_84_P842527	-6.65438	-2.7343	6.65438	down		GB
A_84_P843840	-2.19227	-1.13242	2.19227	down	AT1G38131	Arabidopsis thaliana O-fucosyltransferase-like protein (AT1G38131) mRNA, complete cds [NM_148521]
A_84_P141649	-2.0437	-1.03118	2.0437	down	AT3G55760	Arabidopsis thaliana uncharacterized protein (AT3G55760) mRNA, complete cds [NM_180377]
A_84_P160753	-2.78323	-1.47676	2.78323	down	AT2G41800	Arabidopsis thaliana uncharacterized protein (AT2G41800) mRNA, complete cds [NM_129744]
A_84_P513948	-2.56336	-1.35804	2.56336	down	AT4G27595	Arabidopsis thaliana uncharacterized protein (AT4G27595) mRNA, complete cds [NM_148378]
A_84_P757912	-2.45974	-1.2985	2.45974	down	AT2G32487	Arabidopsis thaliana uncharacterized protein (AT2G32487) mRNA, complete cds [NM_001084525]
A_84_P501388	-8.14373	-3.02569	8.14373	down	AT3G51220	Arabidopsis thaliana uncharacterized protein (AT3G51220) mRNA, complete cds [NM_114981]
A_84_P612207	-3.6686	-1.87523	3.6686	down	AT2G18196	Arabidopsis thaliana heavy-metal-associated domain-containing protein (AT2G18196) mRNA, complete cds [NM_179642]
A_84_P251805	-2.18444	-1.12726	2.18444	down	DAR2	Arabidopsis thaliana DA1-related protein 2 (DAR2) mRNA, complete cds [NM_129542]
A_84_P816193	-5.2121	-2.38186	5.2121	down	THA1	Arabidopsis thaliana threonine aldolase (THA1) mRNA, complete cds [NM_100736]
A_84_P856502	-2.84116	-1.50648	2.84116	down	CPUORF47	Arabidopsis thaliana conserved peptide upstream open reading frame 47 (CPUORF47) mRNA, complete cds [NM_001125688]
A_84_P765493	-4.78536	-2.25863	4.78536	down	AT4G14226	Arabidopsis thaliana uncharacterized protein (AT4G14226) mRNA, complete cds [NM_001125507]
A_84_P861963	-4.53997	-2.18268	4.53997	down
A_84_P22904	-8.40222	-3.07077	8.40222	down	NCRK	Arabidopsis thaliana protein kinase domain-containing protein (NCRK) mRNA, complete cds [NM_179784]
A_84_P19297	-3.87648	-1.95475	3.87648	down	MAD2	Arabidopsis thaliana mitotic spindle checkpoint protein MAD2 (MAD2) mRNA, complete cds [NM_113502]
A_84_P137009	-31.8371	-4.99264	31.8371	down	PDF1.2	Arabidopsis thaliana defensin-like protein 16 (PDF1.2) mRNA, complete cds [NM_123809]
A_84_P13828	-2.06174	-1.04387	2.06174	down	CDS2	Arabidopsis thaliana cytidinediphosphate diacylglycerol synthase 2 (CDS2) mRNA, complete cds [NM_001036620]
A_84_P58430	-4.51727	-2.17545	4.51727	down	AT3G17120	Arabidopsis thaliana uncharacterized protein (AT3G17120) mRNA, complete cds [NM_202597]
A_84_P14089	-3.94781	-1.98105	3.94781	down	FLA12	Arabidopsis thaliana fasciclin-like arabinogalactan protein 12 (FLA12) mRNA, complete cds [NM_125442]
A_84_P174971	-2.07569	-1.05359	2.07569	down	NPY5	Arabidopsis thaliana Phototropic-responsive NPH3 family protein (NPY5) mRNA, complete cds [NM_119923]
A_84_P752395	-5.03485	-2.33195	5.03485	down	AT1G62870	Arabidopsis thaliana uncharacterized protein (AT1G62870) mRNA, complete cds [NM_104965]
A_84_P765062	-2.02936	-1.02102	2.02936	down		Arabidopsis thaliana mRNA for hypothetical protein, complete cds, clone: RAFL07-10-K03 [AK226543]
A_84_P769724	-2.07322	-1.05187	2.07322	down		Rep: Chloroplast 30S ribosomal protein S15 - Arabidopsis thaliana (Mouse-ear cress), partial (98%) [TC404086]
A_84_P814463	-2.21516	-1.14741	2.21516	down	HTH	Arabidopsis thaliana protein HOTHEAD (HTH) mRNA, complete cds [NM_105955]
A_84_P597220	-2.60451	-1.38101	2.60451	down	AT3G09070	Arabidopsis thaliana uncharacterized protein (AT3G09070) mRNA, complete cds [NM_111741]
A_84_P843362	-7.17101	-2.84218	7.17101	down		GB
A_84_P17772	-2.01309	-1.00941	2.01309	down	tny	Arabidopsis thaliana ethylene-responsive transcription factor TINY (tny) mRNA, complete cds [NM_122482]
A_84_P550871	-3.35291	-1.74541	3.35291	down	PUP2	Arabidopsis thaliana purine permease 2 (PUP2) mRNA, complete cds [NM_128934]
A_84_P126121	-3.20496	-1.68031	3.20496	down	AT3G27640	Arabidopsis thaliana protein denticleless (AT3G27640) mRNA, complete cds [NM_113680]
A_84_P756244	-2.12751	-1.08917	2.12751	down
A_84_P106792	-10.2017	-3.35073	10.2017	down	AT4G11550	Arabidopsis thaliana cysteine/histidine-rich C1 domain-containing protein (AT4G11550) mRNA, complete cds [NM_117224]
A_84_P825459	-2.20055	-1.13787	2.20055	down
A_84_P113792	-2.37214	-1.24619	2.37214	down	AT3G03770	Arabidopsis thaliana leucine-rich repeat protein kinase-like protein (AT3G03770) mRNA, complete cds [NM_111248]
A_84_P13638	-2.28157	-1.19003	2.28157	down	RTL2	Arabidopsis thaliana RNAse THREE-like protein 2 (RTL2) mRNA, complete cds [NM_112933]
A_84_P17991	-2.56736	-1.36028	2.56736	down	AT1G80690	Arabidopsis thaliana PPPDE putative thiol peptidase family protein (AT1G80690) mRNA, complete cds [NM_106717]
A_84_P575300	-2.63414	-1.39733	2.63414	down	AT5G39330	Arabidopsis thaliana uncharacterized protein (AT5G39330) mRNA, complete cds [NM_123295]
A_84_P11672	-2.22567	-1.15424	2.22567	down	SCPL12	Arabidopsis thaliana serine carboxypeptidase-like 12 (SCPL12) mRNA, complete cds [NM_127857]
A_84_P753485	-3.71727	-1.89424	3.71727	down		Arabidopsis thaliana clone 11952 mRNA, complete sequence [AY084854]
A_84_P59040	-2.30101	-1.20227	2.30101	down	AT4G35560	Arabidopsis thaliana transducin/WD40 domain-containing protein (AT4G35560) mRNA, complete cds [NM_119721]
A_84_P75644	-2.61481	-1.38671	2.61481	down	GRP9	Arabidopsis thaliana glycine-rich protein 9 (GRP9) mRNA, complete cds [NM_179606]
A_84_P11841	-3.87935	-1.95582	3.87935	down	EXPA16	Arabidopsis thaliana expansin A16 (EXPA16) mRNA, complete cds [NM_115407]
A_84_P10642	-6.68462	-2.74084	6.68462	down	AT2G39850	Arabidopsis thaliana subtilisin-like serine protease (AT2G39850) mRNA, complete cds [NM_129544]
A_84_P550101	-2.15634	-1.10858	2.15634	down	CYP72A13	Arabidopsis thaliana cytochrome P450, family 72, subfamily A, polypeptide 13 (CYP72A13) mRNA, complete cds [NM_112327]
A_84_P13361	-2.11072	-1.07773	2.11072	down	AGO7	Arabidopsis thaliana argonaute-like protein (AGO7) mRNA, complete cds [NM_105611]
A_84_P820898	-3.16301	-1.6613	3.16301	down	AT3G05180	Arabidopsis thaliana GDSL esterase/lipase (AT3G05180) mRNA, complete cds [NM_111391]
A_84_P73104	-2.01233	-1.00887	2.01233	down	CDC6	Arabidopsis thaliana cell division control 6 (CDC6) mRNA, complete cds [NM_128522]
A_84_P762915	-4.80477	-2.26447	4.80477	down		Arabidopsis thaliana clone RAFL07-14-K02 mRNA sequence [AY054471]
A_84_P20761	-2.70158	-1.4338	2.70158	down	AAP2	Arabidopsis thaliana amino acid permease 2 (AAP2) mRNA, complete cds [NM_120958]
A_84_P24113	-2.67741	-1.42084	2.67741	down	PLP3a	Arabidopsis thaliana phosducin-like protein 3 homolog (PLP3a) mRNA, complete cds [NM_114956]
A_84_P14963	-2.53411	-1.34148	2.53411	down	AT1G72230	Arabidopsis thaliana plastocyanin-like domain-containing protein (AT1G72230) mRNA, complete cds [NM_105882]
A_84_P13502	-3.1745	-1.66653	3.1745	down	PD1	Arabidopsis thaliana arogenate dehydratase 3 (PD1) mRNA, complete cds [NM_128342]
A_84_P15646	-2.11726	-1.0822	2.11726	down	HB-12	Arabidopsis thaliana homeobox-leucine zipper protein ATHB-12 (HB-12) mRNA, complete cds [NM_116054]
A_84_P786217	-2.50906	-1.32715	2.50906	down	AT3G49220	Arabidopsis thaliana mRNA for pectinesterase like protein, complete cds, clone: RAFL07-50-M01 [AK226672]
A_84_P112392	-2.03279	-1.02346	2.03279	down	NAI2	Arabidopsis thaliana DNA topoisomerase-like protein (NAI2) mRNA, complete cds [NM_112465]
A_84_P813019	-2.07209	-1.05108	2.07209	down
A_84_P802368	-8.26166	-3.04643	8.26166	down	SAM-2	BP576566 RAFL14 Arabidopsis thaliana cDNA clone RAFL14-92-I12 3', mRNA sequence [BP576566]
A_84_P524813	-3.22333	-1.68855	3.22333	down	AT5G59760	Arabidopsis thaliana uncharacterized protein (AT5G59760) mRNA, complete cds [NM_125368]
A_84_P24136	-2.40663	-1.26702	2.40663	down	AT3G55940	Arabidopsis thaliana phosphoinositide phospholipase C 7 (AT3G55940) mRNA, complete cds [NM_115452]
A_84_P12478	-2.1349	-1.09417	2.1349	down	AT1G54260	Arabidopsis thaliana winged-helix DNA-binding transcription factor family protein (AT1G54260) mRNA, complete cds [NM_104304]
A_84_P19502	-2.2074	-1.14235	2.2074	down	EBS	Arabidopsis thaliana PHD finger and bromo-adjacent homology domain-containing protein (EBS) mRNA, complete cds [NM_118335]
A_84_P816130	-2.35785	-1.23747	2.35785	down
A_84_P18915	-2.473	-1.30626	2.473	down	AT1G51460	Arabidopsis thaliana ABC transporter G family member 13 (AT1G51460) mRNA, complete cds [NM_104024]
A_84_P829314	-2.24977	-1.16978	2.24977	down	AT1G03940	Arabidopsis thaliana HXXXD-type acyl-transferase family protein (AT1G03940) mRNA, complete cds [NM_100275]
A_84_P11154	-3.37813	-1.75622	3.37813	down	YUC6	Arabidopsis thaliana flavin-containing monooxygenase-like protein (YUC6) mRNA, complete cds [NM_001203470]
A_84_P22448	-2.09631	-1.06785	2.09631	down	AT1G06640	Arabidopsis thaliana 1-aminocyclopropane-1-carboxylate oxidase-2 (AT1G06640) mRNA, complete cds [NM_001160842]
A_84_P761666	-3.52976	-1.81957	3.52976	down	AT2G33620	Arabidopsis thaliana Full-length cDNA Complete sequence from clone GSLTSIL90ZF11 of Silique of strain col-0 of Arabidopsis thaliana (thale cress) [BX826200]
A_84_P22199	-2.89099	-1.53156	2.89099	down	AT3G45940	Arabidopsis thaliana alpha-glucosidase (AT3G45940) mRNA, complete cds [NM_114463]
A_84_P516878	-4.66233	-2.22105	4.66233	down	AT1G64625	Arabidopsis thaliana putative serine/threonine-protein kinase WNK10-related protein (AT1G64625) mRNA, complete cds [NM_001198381]
A_84_P562234	-3.23903	-1.69556	3.23903	down	BPEp	Arabidopsis thaliana transcription factor BPE (BPEp) mRNA, complete cds [NM_179498]
A_84_P17974	-2.57208	-1.36293	2.57208	down	FMO GS-OX4	Arabidopsis thaliana flavin-containing monooxygenase FMO GS-OX4 (FMO GS-OX4) mRNA, complete cds [NM_104935]
A_84_P21229	-2.38623	-1.25473	2.38623	down	AT3G21420	Arabidopsis thaliana oxidoreductase, 2OG-Fe(II) oxygenase family protein (AT3G21420) mRNA, complete cds [NM_113037]
A_84_P12981	-2.88788	-1.53001	2.88788	down	AT5G02430	Arabidopsis thaliana transducin/WD40 domain-containing protein (AT5G02430) mRNA, complete cds [NM_120321]
A_84_P789523	-6.57822	-2.7177	6.57822	down	AT4	Arabidopsis thaliana uncharacterized protein (AT4) mRNA, complete cds [NM_180427]
A_84_P12680	-2.05069	-1.03611	2.05069	down	EXPA5	Arabidopsis thaliana expansin A5 (EXPA5) mRNA, complete cds [NM_113824]
A_84_P604776	-3.65239	-1.86884	3.65239	down	AT5G56120	Arabidopsis thaliana uncharacterized protein (AT5G56120) mRNA, complete cds [NM_124994]
A_84_P172093	-2.24011	-1.16357	2.24011	down	OZS1	Arabidopsis thaliana C4-dicarboxylate transporter/malic acid transport protein (OZS1) mRNA, complete cds [NM_101120]
A_84_P542466	-5.75006	-2.52358	5.75006	down	AT5G36710	Arabidopsis thaliana uncharacterized protein (AT5G36710) mRNA, complete cds [NM_123028]
A_84_P20191	-3.75182	-1.90759	3.75182	down	MYB106	Arabidopsis thaliana myb domain protein 106 (MYB106) mRNA, complete cds [NM_110979]
A_84_P20235	-2.11318	-1.07942	2.11318	down	AT3G26770	Arabidopsis thaliana Rossmann-fold NAD(P)-binding domain-containing protein (AT3G26770) mRNA, complete cds [NM_113589]
A_84_P294924	-2.6722	-1.41803	2.6722	down	AT2G38920	Arabidopsis thaliana putative E3 ubiquitin-protein ligase BAH1-like protein (AT2G38920) mRNA, complete cds [NM_129450]
A_84_P849244	-3.48125	-1.7996	3.48125	down		Rep: Uncharacterized membrane protein At1g75140 - Arabidopsis thaliana (Mouse-ear cress), partial (43%) [TC387392]
A_84_P153815	-2.20256	-1.13918	2.20256	down	AT5G62170	Arabidopsis thaliana uncharacterized protein (AT5G62170) mRNA, complete cds [NM_125611]
A_84_P834709	-2.08714	-1.06153	2.08714	down	GLIP5	Arabidopsis thaliana GDSL esterase/lipase 5 (GLIP5) mRNA, complete cds [NM_104270]
A_84_P22818	-2.60124	-1.3792	2.60124	down	AT1G27670	Arabidopsis thaliana uncharacterized protein (AT1G27670) mRNA, complete cds [NM_102532]
A_84_P23171	-3.14016	-1.65084	3.14016	down	HSFA7A	Arabidopsis thaliana heat stress transcription factor A-7a (HSFA7A) mRNA, complete cds [NM_115050]
A_84_P817849	-2.32007	-1.21417	2.32007	down
A_84_P834955	-2.48587	-1.31375	2.48587	down	PDR6	Arabidopsis thaliana ABC transporter G family member 34 (PDR6) mRNA, complete cds [NM_129195]
A_84_P12573	-2.82198	-1.49671	2.82198	down	AT2G44940	Arabidopsis thaliana ethylene-responsive transcription factor ERF034 (AT2G44940) mRNA, complete cds [NM_130059]
A_84_P11746	-2.42295	-1.27676	2.42295	down	AT3G27400	Arabidopsis thaliana pectate lyase (AT3G27400) mRNA, complete cds [NM_113655]
A_84_P14199	-3.26976	-1.70919	3.26976	down	AT1G67340	Arabidopsis thaliana zinc finger (MYND type) family protein / F-box family protein (AT1G67340) mRNA, complete cds [NM_105402]
A_84_P788325	-2.11787	-1.08261	2.11787	down	YAB5	Arabidopsis thaliana axial regulator YABBY 5 (YAB5) mRNA, complete cds [NM_179750]
A_84_P11292	-2.90889	-1.54047	2.90889	down	AT5G17160	Arabidopsis thaliana uncharacterized protein (AT5G17160) mRNA, complete cds [NM_121722]
A_84_P805572	-2.06061	-1.04307	2.06061	down	ATJ3	Arabidopsis thaliana chaperone protein dnaJ 3 (ATJ3) mRNA, complete cds [NM_180322]
A_84_P152688	-3.63778	-1.86306	3.63778	down	ALN	Arabidopsis thaliana allantoinase (ALN) mRNA, complete cds [NM_116734]
A_84_P21614	-3.19055	-1.67381	3.19055	down		Rep: Phenylalanine-4-hydroxylase - Alteromonas macleodii 'Deep ecotype', partial (7%) [TC377280]
A_84_P845464	-2.90288	-1.53749	2.90288	down	AT4G13100	Arabidopsis thaliana RING/U-box domain-containing protein (AT4G13100) mRNA, complete cds [NM_117379]
A_84_P14253	-6.37626	-2.67271	6.37626	down	CHX2	Arabidopsis thaliana cation/H(+) antiporter 2 (CHX2) mRNA, complete cds [NM_106588]
A_84_P10354	-2.69399	-1.42975	2.69399	down	PGP13	Arabidopsis thaliana ABC transporter B family member 13 (PGP13) mRNA, complete cds [NM_102559]
A_84_P18033	-2.05624	-1.04001	2.05624	down	AT1G65710	Arabidopsis thaliana uncharacterized protein (AT1G65710) mRNA, complete cds [NM_105245]
A_84_P278270	-2.47239	-1.30591	2.47239	down	AT1G33170	Arabidopsis thaliana putative methyltransferase PMT18 (AT1G33170) mRNA, complete cds [NM_103049]
[truncated: 2,296 more rows]

## Sheet: 1 W
ProbeName	FC ([2w TG] vs [2w WT])	Log FC ([2w TG] vs [2w WT])	FC (abs) ([2w TG] vs [2w WT])	Regulation ([2w TG] vs [2w WT])	GeneSymbol	Description
A_84_P840007	-3.76445	-1.91244	3.76445	down	AT1G18460	Arabidopsis thaliana alpha/beta-hydrolase-like protein (AT1G18460) mRNA, complete cds [NM_101703]
A_84_P759826	-7.91517	-2.98462	7.91517	down	AT3G11950	Arabidopsis thaliana homogentisate solanesyltransferase (AT3G11950) mRNA, complete cds [NM_001202936]
A_84_P14691	-5.78137	-2.53141	5.78137	down	UTR6	Arabidopsis thaliana UDP-galactose transporter 6 (UTR6) mRNA, complete cds [NM_115798]
A_84_P792507	-4.38059	-2.13113	4.38059	down		1106779 CERES-147 Arabidopsis thaliana cDNA clone 252145 5', mRNA sequence [DR227250]
A_84_P22446	-2.17243	-1.11931	2.17243	down	UBC22	Arabidopsis thaliana ubiquitin-conjugating enzyme E2 22 (UBC22) mRNA, complete cds [NM_120590]
A_84_P798549	-4.73266	-2.24265	4.73266	down		AYBGS51TF pooled cDNA populations Arabidopsis thaliana cDNA, mRNA sequence [EG501568]
A_84_P69834	-4.42996	-2.14729	4.42996	down	DEL3	Arabidopsis thaliana DP-E2F-like protein 3 (DEL3) mRNA, complete cds [NM_110999]
A_84_P23015	-19.163	-4.26026	19.163	down	AT2G03550	Arabidopsis thaliana alpha/beta-Hydrolase-like protein (AT2G03550) mRNA, complete cds [NM_126405]
A_84_P218478	-2.75086	-1.45988	2.75086	down	AT1G74300	Arabidopsis thaliana esterase/lipase/thioesterase family protein (AT1G74300) mRNA, complete cds [NM_106090]
A_84_P12356	-3.3847	-1.75903	3.3847	down	CPISCA	Arabidopsis thaliana Iron-sulfur assembly protein IscA (CPISCA) mRNA, complete cds [NM_100924]
A_84_P787759	-6.1635	-2.62375	6.1635	down	AT3G57810	Arabidopsis thaliana Cysteine proteinases-like protein (AT3G57810) mRNA, complete cds [NM_180385]
A_84_P822373	-11.288	-3.49672	11.288	down	AT3G28270	Arabidopsis thaliana uncharacterized protein (AT3G28270) mRNA, complete cds [NM_113746]
A_84_P822107	-2.14575	-1.10148	2.14575	down	SMO2-1	Arabidopsis thaliana methylsterol monooxygenase (SMO2-1) mRNA, complete cds [NM_202048]
A_84_P14198	-4.60007	-2.20166	4.60007	down	AT1G67400	Arabidopsis thaliana ELMO/CED-12 domain-containing protein (AT1G67400) mRNA, complete cds [NM_105407]
A_84_P15740	-6.32992	-2.66219	6.32992	down	FADA	Arabidopsis thaliana fatty acid desaturase A (FADA) mRNA, complete cds [NM_118837]
A_84_P607354	-2.14948	-1.10399	2.14948	down	AT5G28830	Arabidopsis thaliana EF-hand, calcium binding motif-containing protein (AT5G28830) mRNA, complete cds [NM_122766]
A_84_P290774	-4.02684	-2.00965	4.02684	down	HB25	Arabidopsis thaliana homeobox protein 25 (HB25) mRNA, complete cds [NM_125939]
A_84_P23492	-2.21093	-1.14466	2.21093	down	FKBP13	Arabidopsis thaliana FKBP-type peptidyl-prolyl cis-trans isomerase 3 (FKBP13) mRNA, complete cds [NM_123935]
A_84_P226439	-3.59708	-1.84682	3.59708	down	HDG11	Arabidopsis thaliana homeobox-leucine zipper protein HDG11 (HDG11) mRNA, complete cds [NM_105996]
A_84_P17677	-6.22257	-2.63751	6.22257	down	CPK26	Arabidopsis thaliana calcium-dependent protein kinase 26 (CPK26) mRNA, complete cds [NM_001204020]
A_84_P16067	-2.59948	-1.37823	2.59948	down	AT1G19130	Arabidopsis thaliana uncharacterized protein (AT1G19130) mRNA, complete cds [NM_101771]
A_84_P788002	-2.09094	-1.06415	2.09094	down	AT1G58025	Arabidopsis thaliana DNA-binding bromodomain-containing protein (AT1G58025) mRNA, complete cds [NM_001198329]
A_84_P821408	-2.04209	-1.03005	2.04209	down	TON1B	Arabidopsis thaliana tonneau 1b (TON1b) (TON1B) mRNA, complete cds [NM_115358]
A_84_P518347	-3.55447	-1.82964	3.55447	down	HSBP	Arabidopsis thaliana heat shock factor binding protein (HSBP) mRNA, complete cds [NM_179061]
A_84_P203728	-3.3262	-1.73388	3.3262	down	AT5G48680	Arabidopsis thaliana Sterile alpha motif (SAM) domain-containing protein (AT5G48680) mRNA, complete cds [NM_124245]
A_84_P824410	-2.25675	-1.17424	2.25675	down	AT1G60900	Arabidopsis thaliana Splicing factor U2af large subunit B (AT1G60900) mRNA, complete cds [NM_104771]
A_84_P20810	-3.28207	-1.71461	3.28207	down	AT1G51340	Arabidopsis thaliana MATE efflux family protein (AT1G51340) mRNA, complete cds [NM_202271]
A_84_P22607	-2.37361	-1.24708	2.37361	down	ERF104	Arabidopsis thaliana ethylene-responsive transcription factor ERF104 (ERF104) mRNA, complete cds [NM_125553]
A_84_P195794	-16.1355	-4.01217	16.1355	down	AT4G19390	Arabidopsis thaliana uncharacterized protein (AT4G19390) mRNA, complete cds [NM_118059]
A_84_P817369	-2.43183	-1.28204	2.43183	down	AT1G69340	Arabidopsis thaliana appr-1-p processing enzyme-like protein (AT1G69340) mRNA, complete cds [NM_105601]
A_84_P784727	-2.59711	-1.37691	2.59711	down	MLO10	Arabidopsis thaliana MLO-like protein 10 (MLO10) mRNA, complete cds [NM_125994]
A_84_P555790	-2.18337	-1.12655	2.18337	down	AT5G48657	Arabidopsis thaliana defense protein-like protein (AT5G48657) mRNA, complete cds [NM_203180]
A_84_P758964	-2.02342	-1.01679	2.02342	down	PUB9	Arabidopsis thaliana U-box domain-containing protein 9 (PUB9) mRNA, complete cds [NM_001035579]
A_84_P602497	-3.97041	-1.98929	3.97041	down	COPT4	Arabidopsis thaliana copper transporter 4 (COPT4) mRNA, complete cds [NM_179958]
A_84_P22136	-11.4957	-3.52302	11.4957	down	AHP4	Arabidopsis thaliana histidine-containing phosphotransfer protein 4 (AHP4) mRNA, complete cds [NM_112507]
A_84_P16698	-3.35589	-1.74669	3.35589	down	AT4G29700	Arabidopsis thaliana alkaline-phosphatase-like protein (AT4G29700) mRNA, complete cds [NM_119115]
A_84_P17756	-2.62243	-1.3909	2.62243	down	AT1G49590	Arabidopsis thaliana C2H2 and C2HC zinc finger protein (AT1G49590) mRNA, complete cds [NM_001160940]
A_84_P785024	-3.55471	-1.82973	3.55471	down	NUDT22	Arabidopsis thaliana nudix hydrolase 22 (NUDT22) mRNA, complete cds [NM_128949]
A_84_P115272	-8.33535	-3.05924	8.33535	down	AT4G14200	Arabidopsis thaliana pentatricopeptide repeat-containing protein-like protein (AT4G14200) mRNA, complete cds [NM_117497]
A_84_P19468	-4.03724	-2.01337	4.03724	down	AT4G09890	Arabidopsis thaliana uncharacterized protein (AT4G09890) mRNA, complete cds [NM_117057]
A_84_P13589	-2.06667	-1.04731	2.06667	down	TLP9	Arabidopsis thaliana tubby-like F-box protein 9 (TLP9) mRNA, complete cds [NM_111513]
A_84_P801021	-3.00267	-1.58624	3.00267	down	AT5G28500	Arabidopsis thaliana uncharacterized protein (AT5G28500) mRNA, complete cds [NM_001203487]
A_84_P20058	-3.51796	-1.81474	3.51796	down	ETC2	Arabidopsis thaliana DNA binding / transcription factor (ETC2) mRNA, complete cds [NM_179814]
A_84_P13518	-2.10294	-1.07241	2.10294	down	JMT	Arabidopsis thaliana jasmonic acid carboxyl methyltransferase (JMT) mRNA, complete cds [NM_101820]
A_84_P12888	-2.25119	-1.17069	2.25119	down	CORI3	Arabidopsis thaliana cystine lyase (CORI3) mRNA, complete cds [NM_179099]
A_84_P107652	-2.89079	-1.53147	2.89079	down	AUX1	Arabidopsis thaliana auxin transporter protein 1 (AUX1) mRNA, complete cds [NM_129368]
A_84_P583222	-3.06611	-1.61641	3.06611	down	AT4G36925	Arabidopsis thaliana uncharacterized protein (AT4G36925) mRNA, complete cds [NM_148405]
A_84_P94769	-6.8511	-2.77634	6.8511	down	FLA16	Arabidopsis thaliana fasciclin-like arabinogalactan protein 16 (FLA16) mRNA, complete cds [NM_179922]
A_84_P855885	-5.54532	-2.47127	5.54532	down	AT5G37790	Arabidopsis thaliana protein kinase family protein (AT5G37790) mRNA, complete cds [NM_123138]
A_84_P751278	-3.11207	-1.63787	3.11207	down		Arabidopsis thaliana Full-length cDNA Complete sequence from clone GSLTPGH15ZD09 of Hormone Treated Callus of strain col-0 of Arabidopsis thaliana (thale cress) [BX815895]
A_84_P19233	-3.99955	-1.99984	3.99955	down	FAD3	Arabidopsis thaliana omega-3 fatty acid desaturase, endoplasmic reticulum (FAD3) mRNA, complete cds [NM_179808]
A_84_P162753	-2.17412	-1.12043	2.17412	down	AT1G63240	Arabidopsis thaliana uncharacterized protein (AT1G63240) mRNA, complete cds [NM_105003]
A_84_P12061	-2.69373	-1.42961	2.69373	down	MIPS3	Arabidopsis thaliana myo-inositol-1-phosphate synthase (MIPS3) mRNA, complete cds [NM_121055]
A_84_P16595	-2.09742	-1.06862	2.09742	down	GATL7	Arabidopsis thaliana putative galacturonosyltransferase-like 7 (GATL7) mRNA, complete cds [NM_116131]
A_84_P91849	-2.01332	-1.00958	2.01332	down	PTAC16	Arabidopsis thaliana protein plastid transcriptionally active 16 (PTAC16) mRNA, complete cds [NM_114545]
A_84_P588609	-2.59975	-1.37837	2.59975	down	FZR3	Arabidopsis thaliana protein FIZZY-related 3 (FZR3) mRNA, complete cds [NM_121387]
A_84_P831568	-4.24372	-2.08533	4.24372	down	MRH1	Arabidopsis thaliana putative LRR receptor-like serine/threonine-protein kinase MRH1 (MRH1) mRNA, complete cds [NM_117980]
A_84_P784276	-3.26988	-1.70924	3.26988	down	CO	Arabidopsis thaliana zinc finger protein CONSTANS (CO) mRNA, complete cds [NM_121589]
A_84_P294984	-2.31124	-1.20866	2.31124	down	AT1G24735	Arabidopsis thaliana caffeoyl-CoA O-methyltransferase (AT1G24735) mRNA, complete cds [NM_102310]
A_84_P194504	-2.30435	-1.20436	2.30435	down	CLE25	Arabidopsis thaliana protein CLAVATA3/ESR-related 25 (CLE25) mRNA, complete cds [NM_148758]
A_84_P10524	-2.4917	-1.31713	2.4917	down	AT1G66810	Arabidopsis thaliana zinc finger CCCH domain-containing protein 14 (AT1G66810) mRNA, complete cds [NM_105352]
A_84_P754534	-2.08467	-1.05982	2.08467	down	AT1G45229	Arabidopsis thaliana uncharacterized protein (AT1G45229) mRNA, complete cds [NM_001123969]
A_84_P20743	-3.13858	-1.65011	3.13858	down	AT5G15740	Arabidopsis thaliana O-fucosyltransferase family protein (AT5G15740) mRNA, complete cds [NM_121579]
A_84_P584558	-2.11051	-1.07759	2.11051	down	AT1G72600	Arabidopsis thaliana hydroxyproline-rich glycoprotein family protein (AT1G72600) mRNA, complete cds [NM_105919]
A_84_P15002	-3.75441	-1.90859	3.75441	down	AT5G51890	Arabidopsis thaliana peroxidase 66 (AT5G51890) mRNA, complete cds [NM_124568]
A_84_P756760	-2.83552	-1.50361	2.83552	down
A_84_P556908	-3.05767	-1.61243	3.05767	down	AT1G51430	Arabidopsis thaliana uncharacterized protein (AT1G51430) mRNA, complete cds [NM_104021]
A_84_P89979	-2.41731	-1.2734	2.41731	down	SYP111	Arabidopsis thaliana syntaxin-related protein KNOLLE (SYP111) mRNA, complete cds [NM_100729]
A_84_P14978	-2.58662	-1.37107	2.58662	down	DUR3	Arabidopsis thaliana solute:sodium symporter (DUR3) mRNA, complete cds [NM_123906]
A_84_P11195	-2.79153	-1.48106	2.79153	down	AT5G44680	Arabidopsis thaliana DNA-3-methyladenine glycosylase I (AT5G44680) mRNA, complete cds [NM_123835]
A_84_P708689	-2.01235	-1.00888	2.01235	down	DWF1	BP668272 RAFL21 Arabidopsis thaliana cDNA clone RAFL21-26-J07 3', mRNA sequence [BP668272]
A_84_P10187	-2.54043	-1.34507	2.54043	down	AT5G16340	Arabidopsis thaliana AMP-binding protein 6 (AT5G16340) mRNA, complete cds [NM_121639]
A_84_P16272	-2.16995	-1.11766	2.16995	down	AT1G51080	Arabidopsis thaliana uncharacterized protein (AT1G51080) mRNA, complete cds [NM_103986]
A_84_P214028	-2.17041	-1.11797	2.17041	down	FLP	Arabidopsis thaliana FOUR LIPS transcription factor R2R3-MYB (FLP) mRNA, complete cds [NM_001084065]
A_84_P22137	-3.63778	-1.86306	3.63778	down	MPC	Arabidopsis thaliana poly-A binding protein-like protein (MPC) mRNA, complete cds [NM_112822]
A_84_P763570	-2.51364	-1.32978	2.51364	down
A_84_P201648	-4.88312	-2.2878	4.88312	down	NTL9	Arabidopsis thaliana NAC transcription factor-like 9 (NTL9) mRNA, complete cds [NM_001203998]
A_84_P102996	-4.16154	-2.05712	4.16154	down	AT5G24580	Arabidopsis thaliana heavy metal transport/detoxification domain-containing protein (AT5G24580) mRNA, complete cds [NM_203101]
A_84_P14314	-2.5723	-1.36306	2.5723	down	ETC1	Arabidopsis thaliana proto-oncogene protein (ETC1) mRNA, complete cds [NM_100020]
A_84_P786781	-2.54647	-1.3485	2.54647	down	AT2G35760	Arabidopsis thaliana uncharacterized protein (AT2G35760) mRNA, complete cds [NM_129134]
A_84_P11413	-3.59552	-1.8462	3.59552	down	AT1G30600	Arabidopsis thaliana subtilase-like protein (AT1G30600) mRNA, complete cds [NM_102797]
A_84_P18192	-5.7168	-2.51521	5.7168	down	EXPB1	Arabidopsis thaliana expansin B1 (EXPB1) mRNA, complete cds [NM_127640]
A_84_P19590	-4.09358	-2.03336	4.09358	down	TPS5	Arabidopsis thaliana alpha,alpha-trehalose-phosphate synthase [UDP-forming] 5 (TPS5) mRNA, complete cds [NM_117886]
A_84_P760764	-2.71327	-1.44003	2.71327	down
A_84_P19081	-7.67077	-2.93937	7.67077	down	AT1G25530	Arabidopsis thaliana lysine histidine transporter-like 6 (AT1G25530) mRNA, complete cds [NM_102364]
A_84_P19829	-2.4542	-1.29525	2.4542	down	AT5G58390	Arabidopsis thaliana peroxidase 67 (AT5G58390) mRNA, complete cds [NM_125225]
A_84_P18673	-3.96422	-1.98704	3.96422	down	MYB29	Arabidopsis thaliana myb domain protein 29 (MYB29) mRNA, complete cds [NM_120851]
A_84_P180674	-4.66708	-2.22252	4.66708	down	AT5G67460	Arabidopsis thaliana O-Glycosyl hydrolases family 17 protein (AT5G67460) mRNA, complete cds [NM_126146]
A_84_P23047	-3.50355	-1.80882	3.50355	down	scpl25	Arabidopsis thaliana serine carboxypeptidase-like 25 (scpl25) mRNA, complete cds [NM_111077]
A_84_P22815	-2.83615	-1.50393	2.83615	down	AT1G77700	Arabidopsis thaliana pathogenesis-related thaumatin-like protein (AT1G77700) mRNA, complete cds [NM_106419]
A_84_P123822	-2.16869	-1.11682	2.16869	down	SNZ	Arabidopsis thaliana AP2-like ethylene-responsive transcription factor SNZ (SNZ) mRNA, complete cds [NM_179982]
A_84_P282820	-2.00664	-1.00478	2.00664	down	AT2G44040	Arabidopsis thaliana dihydrodipicolinate reductase 1 (AT2G44040) mRNA, complete cds [NM_129966]
A_84_P846684	-2.47025	-1.30466	2.47025	down	GT72B1	Arabidopsis thaliana hydroquinone glucosyltransferase (GT72B1) mRNA, complete cds [NM_001203720]
A_84_P67134	-3.13206	-1.64711	3.13206	down	AT5G64550	Arabidopsis thaliana loricrin-related protein (AT5G64550) mRNA, complete cds [NM_125851]
A_84_P738659	-2.05551	-1.0395	2.05551	down	SUC2	Arabidopsis thaliana clone 104329 mRNA sequence [DQ108678]
A_84_P24024	-2.71495	-1.44092	2.71495	down	AHP1	Arabidopsis thaliana histidine-containing phosphotransmitter 1 (AHP1) mRNA, complete cds [NM_113046]
A_84_P59580	-2.8008	-1.48584	2.8008	down	AT4G34560	Arabidopsis thaliana uncharacterized protein (AT4G34560) mRNA, complete cds [NM_119622]
A_84_P768317	-2.53456	-1.34173	2.53456	down	AT5G40405	Arabidopsis thaliana pentatricopeptide repeat-containing protein (AT5G40405) mRNA, complete cds [NM_001036910]
A_84_P173611	-2.33056	-1.22068	2.33056	down	AT2G41170	Arabidopsis thaliana F-box protein (AT2G41170) mRNA, complete cds [NM_180016]
A_84_P22133	-4.12154	-2.04318	4.12154	down	BGLU43	Arabidopsis thaliana beta glucosidase 43 (BGLU43) mRNA, complete cds [NM_112689]
A_84_P762938	-5.29009	-2.40329	5.29009	down		Arabidopsis thaliana clone 29898 mRNA sequence [DQ108837]
A_84_P869119	-4.97366	-2.31431	4.97366	down	FAD3	Arabidopsis thaliana omega-3 fatty acid desaturase, endoplasmic reticulum (FAD3) mRNA, complete cds [NM_179808]
A_84_P563750	-3.67548	-1.87793	3.67548	down	AT5G45530	Arabidopsis thaliana uncharacterized protein (AT5G45530) mRNA, complete cds [NM_123921]
A_84_P10989	-3.85614	-1.94716	3.85614	down	ATK1	Arabidopsis thaliana kinesin 1 (ATK1) mRNA, complete cds [NM_118246]
A_84_P752319	-2.14381	-1.10018	2.14381	down
A_84_P796323	-2.11829	-1.0829	2.11829	down	AT4G15820	Arabidopsis thaliana clone 39757 mRNA, complete sequence [AY087936]
A_84_P830486	-2.19004	-1.13096	2.19004	down	CVL1	Arabidopsis thaliana protein CVP2 like 1 (CVL1) mRNA, complete cds [NM_001202725]
A_84_P854985	-31.6639	-4.98477	31.6639	down	AT4G13840	Arabidopsis thaliana HXXXD-type acyl-transferase-like protein (AT4G13840) mRNA, complete cds [NM_117458]
A_84_P15912	-6.73877	-2.75249	6.73877	down	AT5G42180	Arabidopsis thaliana peroxidase 64 (AT5G42180) mRNA, complete cds [NM_123583]
A_84_P182924	-3.40255	-1.76661	3.40255	down		GB
A_84_P582417	-8.62842	-3.1091	8.62842	down	AT5G26230	Arabidopsis thaliana uncharacterized protein (AT5G26230) mRNA, complete cds [NM_122524]
A_84_P800117	-2.99887	-1.58442	2.99887	down	AT4G06536	Arabidopsis thaliana SPla/RYanodine receptor (SPRY) domain-containing protein (AT4G06536) mRNA, complete cds [NM_178981]
A_84_P14276	-3.80906	-1.92943	3.80906	down	AT1G22550	Arabidopsis thaliana putative peptide/nitrate transporter (AT1G22550) mRNA, complete cds [NM_102104]
A_84_P200164	-2.05424	-1.0386	2.05424	down	WPP3	Arabidopsis thaliana WPP domain-containing protein 3 (WPP3) mRNA, complete cds [NM_122676]
A_84_P166353	-5.69551	-2.50983	5.69551	down	AT5G11280	Arabidopsis thaliana uncharacterized protein (AT5G11280) mRNA, complete cds [NM_121166]
A_84_P819067	-3.22257	-1.68821	3.22257	down	AT5G01590	Arabidopsis thaliana uncharacterized protein (AT5G01590) mRNA, complete cds [NM_120237]
A_84_P290414	-2.95494	-1.56313	2.95494	down	AT4G39840	Arabidopsis thaliana uncharacterized protein (AT4G39840) mRNA, complete cds [NM_120147]
A_84_P20185	-2.21655	-1.14831	2.21655	down	EBF1	Arabidopsis thaliana EIN3-binding F-box protein 1 (EBF1) mRNA, complete cds [NM_128106]
A_84_P24167	-2.61273	-1.38556	2.61273	down	AT3G43590	Arabidopsis thaliana zinc knuckle (CCHC-type) family protein (AT3G43590) mRNA, complete cds [NM_114227]
A_84_P784871	-2.89061	-1.53137	2.89061	down	SYP111	Arabidopsis thaliana syntaxin-related protein KNOLLE (SYP111) mRNA, complete cds [NM_100729]
A_84_P754720	-3.13208	-1.64712	3.13208	down		16-E012999-019-004-P03-T7R MPIZ-ADIS-019 Arabidopsis thaliana cDNA clone MPIZp768P034Q 5-PRIME, mRNA sequence [CB252853]
A_84_P12289	-6.83951	-2.77389	6.83951	down	AT1G06360	Arabidopsis thaliana delta-9 desaturase-like 5 protein (AT1G06360) mRNA, complete cds [NM_100517]
A_84_P807679	-5.27532	-2.39926	5.27532	down	AT5G15780	Arabidopsis thaliana Pollen Ole e 1 allergen and extensin family protein (AT5G15780) mRNA, complete cds [NM_121583]
A_84_P105026	-2.08982	-1.06338	2.08982	down	AT1G68220	Arabidopsis thaliana uncharacterized protein (AT1G68220) mRNA, complete cds [NM_105493]
A_84_P820158	-2.32972	-1.22016	2.32972	down	HIS1-3	Arabidopsis thaliana histone H1-3 (HIS1-3) mRNA, complete cds [NM_127361]
A_84_P22764	-4.18798	-2.06625	4.18798	down	AT1G65180	Arabidopsis thaliana DC1 domain-containing protein (AT1G65180) mRNA, complete cds [NM_105191]
A_84_P180124	-10.0009	-3.32206	10.0009	down	AT1G04360	Arabidopsis thaliana RING-H2 finger protein ATL1 (AT1G04360) mRNA, complete cds [NM_100316]
A_84_P282270	-4.86431	-2.28224	4.86431	down	AT5G43150	Arabidopsis thaliana uncharacterized protein (AT5G43150) mRNA, complete cds [NM_123681]
A_84_P20866	-4.28478	-2.09922	4.28478	down	AXR3	Arabidopsis thaliana auxin-responsive protein IAA17 (AXR3) mRNA, complete cds [NM_100306]
A_84_P24160	-3.82631	-1.93595	3.82631	down	GLP10	Arabidopsis thaliana germin-like protein subfamily 2 member 4 (GLP10) mRNA, complete cds [NM_202748]
A_84_P813123	-4.18345	-2.06469	4.18345	down	BGAL3	Arabidopsis thaliana beta-galactosidase 3 (BGAL3) mRNA, complete cds [NM_119799]
A_84_P119352	-2.47859	-1.30952	2.47859	down	AT3G53970	Arabidopsis thaliana proteasome inhibitor subunit 1 (PI31) (AT3G53970) mRNA, complete cds [NM_202697]
A_84_P805135	-3.16072	-1.66025	3.16072	down	AT3G15450	Arabidopsis thaliana aluminum induced protein with YGL and LRDR motif (AT3G15450) mRNA, complete cds [NM_001035625]
A_84_P13834	-2.44102	-1.28749	2.44102	down	AT4G23800	Arabidopsis thaliana HMG (high mobility group) box protein (AT4G23800) mRNA, complete cds [NM_118511]
A_84_P17929	-3.05709	-1.61216	3.05709	down	GolS2	Arabidopsis thaliana galactinol synthase 2 (GolS2) mRNA, complete cds [NM_104537]
A_84_P11200	-2.82531	-1.49841	2.82531	down	AT5G45920	Arabidopsis thaliana GDSL esterase/lipase (AT5G45920) mRNA, complete cds [NM_123960]
A_84_P15736	-7.76868	-2.95767	7.76868	down	AT1G21810	Arabidopsis thaliana uncharacterized protein (AT1G21810) mRNA, complete cds [NM_102029]
A_84_P841733	-4.42644	-2.14615	4.42644	down	AT5G15581	Arabidopsis thaliana uncharacterized protein (AT5G15581) mRNA, complete cds [NM_001125757]
A_84_P13282	-2.31621	-1.21177	2.31621	down	AT1G75710	Arabidopsis thaliana C2H2-like zinc finger protein (AT1G75710) mRNA, complete cds [NM_106222]
A_84_P750837	-2.80582	-1.48842	2.80582	down	AGL87	Arabidopsis thaliana protein AGAMOUS-like 87 (AGL87) mRNA, complete cds [NM_102106]
A_84_P22769	-5.46686	-2.45071	5.46686	down	AT1G11700	Arabidopsis thaliana uncharacterized protein (AT1G11700) mRNA, complete cds [NM_101042]
A_84_P274410	-2.13199	-1.0922	2.13199	down	AT1G68330	Arabidopsis thaliana uncharacterized protein (AT1G68330) mRNA, complete cds [NM_105504]
A_84_P214238	-2.36967	-1.24469	2.36967	down	GGPS3	Arabidopsis thaliana geranylgeranyl diphosphate synthase 3 (GGPS3) mRNA, complete cds [NM_112315]
A_84_P12264	-4.07601	-2.02716	4.07601	down	MES18	Arabidopsis thaliana methyl esterase 18 (MES18) mRNA, complete cds [NM_125216]
A_84_P18073	-2.55756	-1.35477	2.55756	down	AT1G55690	Arabidopsis thaliana sec.4-like phosphatidylinositol transfer protein (AT1G55690) mRNA, complete cds [NM_179484]
A_84_P825194	-2.01094	-1.00787	2.01094	down	AT1G48090	Arabidopsis thaliana calcium-dependent lipid-binding-like protein (AT1G48090) mRNA, complete cds [NM_103704]
A_84_P18232	-2.36424	-1.24138	2.36424	down	AT2G28810	Arabidopsis thaliana Dof zinc finger protein DOF2.2 (AT2G28810) mRNA, complete cds [NM_001202698]
A_84_P845406	-2.31465	-1.21079	2.31465	down	ASN1	Arabidopsis thaliana asparagine synthetase [glutamine-hydrolyzing] (ASN1) mRNA, complete cds [NM_114602]
A_84_P16901	-23.5976	-4.56057	23.5976	down	UF3GT	Arabidopsis thaliana UDP-glucose:flavonoid 3-o-glucosyltransferase (UF3GT) mRNA, complete cds [NM_124785]
A_84_P123262	-2.22806	-1.15579	2.22806	down	AT1G61740	Arabidopsis thaliana Sulfite exporter TauE/SafE family protein (AT1G61740) mRNA, complete cds [NM_104856]
A_84_P707913	-2.00176	-1.00127	2.00176	down	PQL3	Arabidopsis thaliana oxygen evolving enhancer 3 (PsbQ)-like 3 (PQL3) mRNA, complete cds [NM_001035870]
A_84_P835248	-2.33431	-1.22299	2.33431	down	AT1G27660	Arabidopsis thaliana transcription factor bHLH110 (AT1G27660) mRNA, complete cds [NM_102531]
A_84_P23309	-3.09935	-1.63196	3.09935	down	VIIIB	Arabidopsis thaliana myosin heavy chain-like protein (VIIIB) mRNA, complete cds [NM_118871]
A_84_P16974	-85.3224	-6.41485	85.3224	down	GER3	Arabidopsis thaliana germin-like protein subfamily 3 member 3 (GER3) mRNA, complete cds [NM_122070]
A_84_P72884	-3.18476	-1.67119	3.18476	down	AT5G26190	Arabidopsis thaliana cysteine/histidine-rich C1 domain-containing protein (AT5G26190) mRNA, complete cds [NM_122520]
A_84_P21997	-3.78998	-1.92219	3.78998	down	SPL9	Arabidopsis thaliana squamosa promoter-binding-like protein 9 (SPL9) mRNA, complete cds [NM_129782]
A_84_P12704	-4.63518	-2.21262	4.63518	down	AT3G27200	Arabidopsis thaliana plastocyanin-like domain-containing protein (AT3G27200) mRNA, complete cds [NM_113634]
A_84_P10105	-4.25259	-2.08834	4.25259	down	XCP1	Arabidopsis thaliana Xylem cysteine proteinase 1 (XCP1) mRNA, complete cds [NM_202958]
A_84_P552933	-8.15208	-3.02717	8.15208	down	AT4G23020	Arabidopsis thaliana uncharacterized protein (AT4G23020) mRNA, complete cds [NM_118431]
A_84_P143149	-3.54545	-1.82597	3.54545	down	PDLP3	Arabidopsis thaliana cysteine-rich repeat secretory protein 11 (PDLP3) mRNA, complete cds [NM_128893]
A_84_P862370	-2.01833	-1.01316	2.01833	down	KCS6	Arabidopsis thaliana 3-ketoacyl-CoA synthase 6 (KCS6) mRNA, complete cds [NM_105524]
A_84_P13432	-4.6122	-2.20545	4.6122	down	PRR1	Arabidopsis thaliana pinoresinol reductase 1 (PRR1) mRNA, complete cds [NM_102944]
A_84_P841983	-6.31649	-2.65912	6.31649	down		tc
A_84_P593573	-2.40555	-1.26636	2.40555	down	AT2G30820	Arabidopsis thaliana uncharacterized protein (AT2G30820) mRNA, complete cds [NM_001036372]
A_84_P814302	-2.55069	-1.35089	2.55069	down	AT5G11420	Arabidopsis thaliana uncharacterized protein (AT5G11420) mRNA, complete cds [NM_121180]
A_84_P13976	-2.9278	-1.54982	2.9278	down	AT5G19120	Arabidopsis thaliana aspartyl protease family protein (AT5G19120) mRNA, complete cds [NM_121917]
A_84_P824259	-2.11303	-1.07932	2.11303	down	CDS2	Arabidopsis thaliana cytidinediphosphate diacylglycerol synthase 2 (CDS2) mRNA, complete cds [NM_001036620]
A_84_P787532	-3.60186	-1.84874	3.60186	down	AT5G06270	Arabidopsis thaliana uncharacterized protein (AT5G06270) mRNA, complete cds [NM_120710]
A_84_P15631	-5.20677	-2.38039	5.20677	down	AT3G57830	Arabidopsis thaliana leucine-rich repeat protein kinase-like protein (AT3G57830) mRNA, complete cds [NM_115645]
A_84_P12643	-3.42009	-1.77403	3.42009	down	AT3G05620	Arabidopsis thaliana pectinesterase 22 (AT3G05620) mRNA, complete cds [NM_111435]
A_84_P838032	-2.252	-1.17121	2.252	down		Rep: Chromosome chr1 scaffold_5, whole genome shotgun sequence - Vitis vinifera (Grape), partial (24%) [TC387751]
A_84_P762464	-7.47037	-2.90118	7.47037	down		Arabidopsis thaliana mRNA for hypothetical protein, complete cds, clone: RAFL14-04-D19 [AK227365]
A_84_P98726	-2.78789	-1.47917	2.78789	down	AT2G34620	Arabidopsis thaliana transcription termination factor-like protein (AT2G34620) mRNA, complete cds [NM_129016]
A_84_P13277	-2.49263	-1.31767	2.49263	down	AT1G05210	Arabidopsis thaliana putative transmembrane protein 97 (AT1G05210) mRNA, complete cds [NM_100400]
A_84_P125451	-2.03125	-1.02237	2.03125	down	AT5G62580	Arabidopsis thaliana ARM repeat-containing protein-like protein (AT5G62580) mRNA, complete cds [NM_125653]
A_84_P170753	-2.02024	-1.01453	2.02024	down	AT5G02890	Arabidopsis thaliana HXXXD-type acyl-transferase-like protein (AT5G02890) mRNA, complete cds [NM_120367]
A_84_P10914	-3.05171	-1.60962	3.05171	down	ATL4	Arabidopsis thaliana E3 ubiquitin-protein ligase ATL4 (ATL4) mRNA, complete cds [NM_115885]
A_84_P769882	-2.34211	-1.22781	2.34211	down		Rep: Uncharacterized protein ycf15 - Arabidopsis thaliana (Mouse-ear cress), complete [TC398782]
A_84_P21421	-3.14465	-1.6529	3.14465	down	AT4G28240	Arabidopsis thaliana putative wound-responsive protein (AT4G28240) mRNA, complete cds [NM_118964]
A_84_P17893	-2.03713	-1.02654	2.03713	down	KAC2	Arabidopsis thaliana kinesin like protein for actin based chloroplast movement 2 (KAC2) mRNA, complete cds [NM_125944]
A_84_P94009	-2.18004	-1.12436	2.18004	down	RRA1	Arabidopsis thaliana Nucleotide-diphospho-sugar transferase family protein (RRA1) mRNA, complete cds [NM_106168]
A_84_P14991	-4.56054	-2.18921	4.56054	down	AT5G48740	Arabidopsis thaliana putative LRR receptor-like serine/threonine-protein kinase (AT5G48740) mRNA, complete cds [NM_124251]
A_84_P834716	-2.89331	-1.53272	2.89331	down	AT3G19370	Arabidopsis thaliana uncharacterized protein (AT3G19370) mRNA, complete cds [NM_112824]
A_84_P104886	-2.17194	-1.11898	2.17194	down	AT5G63350	Arabidopsis thaliana uncharacterized protein (AT5G63350) mRNA, complete cds [NM_125730]
A_84_P168923	-3.47454	-1.79682	3.47454	down	AT1G48330	Arabidopsis thaliana uncharacterized protein (AT1G48330) mRNA, complete cds [NM_103730]
A_84_P799284	-2.37844	-1.25002	2.37844	down		AYAWK40TF pooled cDNA populations Arabidopsis thaliana cDNA, mRNA sequence [EG457609]
A_84_P17162	-2.27628	-1.18668	2.27628	down	RPS17	Arabidopsis thaliana 30S ribosomal protein S17 (RPS17) mRNA, complete cds [NM_106634]
A_84_P857762	-2.17641	-1.12195	2.17641	down		Rep: Vegetative storage protein Vsp2 - Arabidopsis thaliana (Mouse-ear cress), partial (35%) [TC398156]
A_84_P298464	-4.0934	-2.0333	4.0934	down	AT4G34220	Arabidopsis thaliana receptor protein kinase-like protein (AT4G34220) mRNA, complete cds [NM_119586]
A_84_P19375	-3.03095	-1.59977	3.03095	down	PRXCA	Arabidopsis thaliana peroxidase 33 (PRXCA) mRNA, complete cds [NM_114770]
A_84_P809337	-3.5803	-1.84008	3.5803	down	PORB	Arabidopsis thaliana protochlorophyllide reductase B (PORB) mRNA, complete cds [NM_118879]
A_84_P18856	-2.58425	-1.36975	2.58425	down	RGL3	Arabidopsis thaliana DELLA protein RGL3 (RGL3) mRNA, complete cds [NM_121755]
A_84_P11635	-2.29289	-1.19717	2.29289	down	HOL1	Arabidopsis thaliana thiocyanate methyltransferase 1 (HOL1) mRNA, complete cds [NM_001084584]
A_84_P20411	-3.02416	-1.59654	3.02416	down	APX4	Arabidopsis thaliana ascorbate peroxidase 4 (APX4) mRNA, complete cds [NM_116970]
A_84_P756046	-3.6527	-1.86896	3.6527	down	AT2G43440	Arabidopsis thaliana F-box protein (AT2G43440) mRNA, complete cds [NM_129905]
A_84_P10122	-2.07617	-1.05393	2.07617	down	SBP2	Arabidopsis thaliana selenium-binding protein 2 (SBP2) mRNA, complete cds [NM_117479]
A_84_P11230	-16.1004	-4.00902	16.1004	down	PORA	Arabidopsis thaliana protochlorophyllide reductase A (PORA) mRNA, complete cds [NM_124799]
A_84_P10821	-7.92961	-2.98725	7.92961	down		GB
A_84_P854492	-2.07428	-1.05261	2.07428	down	HYR1	Arabidopsis thaliana UDP-glycosyltransferase-like protein (HYR1) mRNA, complete cds [NM_113071]
A_84_P758650	-5.82293	-2.54175	5.82293	down	AT2G07215	AYAGP50TR pooled cDNA populations Arabidopsis thaliana cDNA, mRNA sequence [EG428126]
A_84_P235153	-2.96717	-1.56909	2.96717	down	AT3G21810	Arabidopsis thaliana zinc finger CCCH domain-containing protein 40 (AT3G21810) mRNA, complete cds [NM_113076]
A_84_P262260	-2.61333	-1.38589	2.61333	down	AT2G23700	Arabidopsis thaliana uncharacterized protein (AT2G23700) mRNA, complete cds [NM_127933]
A_84_P20149	-2.7764	-1.47322	2.7764	down	AT2G04570	Arabidopsis thaliana GDSL esterase/lipase (AT2G04570) mRNA, complete cds [NM_126488]
A_84_P10501	-2.05921	-1.04209	2.05921	down	HSL1	Arabidopsis thaliana receptor-like protein kinase HSL1 (HSL1) mRNA, complete cds [NM_102612]
A_84_P824668	-2.75897	-1.46413	2.75897	down	MYB106	Arabidopsis thaliana myb domain protein 106 (MYB106) mRNA, complete cds [NM_110979]
A_84_P825992	-2.13557	-1.09462	2.13557	down	WAVE1	Arabidopsis thaliana protein SCAR1 (WAVE1) mRNA, complete cds [NM_179894]
A_84_P601919	-3.59381	-1.84551	3.59381	down	AT4G34550	Arabidopsis thaliana uncharacterized protein (AT4G34550) mRNA, complete cds [NM_119620]
A_84_P847920	-5.00363	-2.32298	5.00363	down	AT5G43150	Arabidopsis thaliana uncharacterized protein (AT5G43150) mRNA, complete cds [NM_123681]
A_84_P21429	-2.97421	-1.57251	2.97421	down	AT4G30020	Arabidopsis thaliana PA-domain containing subtilase family protein (AT4G30020) mRNA, complete cds [NM_119148]
A_84_P597535	-3.52709	-1.81848	3.52709	down	AT5G14090	Arabidopsis thaliana uncharacterized protein (AT5G14090) mRNA, complete cds [NM_121412]
A_84_P11122	-18.2229	-4.18768	18.2229	down	TINY2	Arabidopsis thaliana dehydration-responsive element-binding protein 3 (TINY2) mRNA, complete cds [NM_121197]
A_84_P16241	-12.6537	-3.66149	12.6537	down	AT1G52190	Arabidopsis thaliana putative peptide transporter (AT1G52190) mRNA, complete cds [NM_104099]
A_84_P10554	-4.23886	-2.08368	4.23886	down	AT1G14580	Arabidopsis thaliana C2H2-like zinc finger protein (AT1G14580) mRNA, complete cds [NM_001198065]
A_84_P10340	-2.87163	-1.52187	2.87163	down	AT5G15070	Arabidopsis thaliana phosphoglycerate mutase-like protein (AT5G15070) mRNA, complete cds [NM_001203384]
A_84_P527390	-2.18146	-1.12529	2.18146	down	LSH1	Arabidopsis thaliana uncharacterized protein (LSH1) mRNA, complete cds [NM_122732]
A_84_P530756	-4.04621	-2.01657	4.04621	down	TCX2	Arabidopsis thaliana TESMIN/TSO1-like CXC 2 (TCX2) mRNA, complete cds [NM_117562]
A_84_P751176	-2.2512	-1.17069	2.2512	down		Arabidopsis thaliana mRNA for hypothetical protein, clone: RAFL14-58-O08 [AK228107]
A_84_P212638	-2.31432	-1.21059	2.31432	down	HEMD	Arabidopsis thaliana Uroporphyrinogen-III synthase (HEMD) mRNA, complete cds [NM_128211]
A_84_P96826	-5.43983	-2.44356	5.43983	down	AT1G71210	Arabidopsis thaliana pentatricopeptide repeat-containing protein (AT1G71210) mRNA, complete cds [NM_105790]
A_84_P23696	-2.29996	-1.20161	2.29996	down	PG1	Arabidopsis thaliana polygalacturonase 1 (PG1) mRNA, complete cds [NM_104726]
A_84_P14796	-2.77977	-1.47497	2.77977	down	PORB	Arabidopsis thaliana protochlorophyllide reductase B (PORB) mRNA, complete cds [NM_001036654]
A_84_P572258	-2.08088	-1.05719	2.08088	down	AT3G09730	Arabidopsis thaliana uncharacterized protein (AT3G09730) mRNA, complete cds [NM_111807]
A_84_P17493	-2.5699	-1.36171	2.5699	down	AT3G51280	Arabidopsis thaliana tetratricopeptide repeat domain-containing protein (AT3G51280) mRNA, complete cds [NM_114987]
A_84_P22571	-2.03258	-1.02331	2.03258	down	LTI78	Arabidopsis thaliana low-temperature-responsive protein 78/desiccation-responsive protein 29A (LTI78) mRNA, complete cds [NM_124610]
A_84_P21377	-3.25458	-1.70247	3.25458	down	ATL4H	Arabidopsis thaliana putative RING-H2 finger protein ATL53 (ATL4H) mRNA, complete cds [NM_001125531]
A_84_P72454	-2.08395	-1.05932	2.08395	down	AT3G48980	Arabidopsis thaliana uncharacterized protein (AT3G48980) mRNA, complete cds [NM_114757]
A_84_P831380	-2.68151	-1.42305	2.68151	down	AT2G25480	Arabidopsis thaliana TPX2 (targeting protein for Xklp2) family protein (AT2G25480) mRNA, complete cds [NM_128105]
A_84_P820808	-3.94392	-1.97963	3.94392	down	AT5G09880	Arabidopsis thaliana RNA-binding protein 39 (AT5G09880) mRNA, complete cds [NM_121025]
A_84_P268780	-3.98784	-1.99561	3.98784	down	AT1G45010	Arabidopsis thaliana TRAM, LAG1 and CLN8 (TLC) lipid-sensing domain containing protein (AT1G45010) mRNA, complete cds [NM_103581]
A_84_P790868	-2.00921	-1.00663	2.00921	down	NAC105	Arabidopsis thaliana NAC domain containing protein 105 (NAC105) mRNA, complete cds [NM_126028]
A_84_P805349	-2.35914	-1.23826	2.35914	down	GAE6	Arabidopsis thaliana UDP-D-glucuronate 4-epimerase 6 (GAE6) mRNA, complete cds [NM_113287]
A_84_P12166	-3.89962	-1.96333	3.89962	down	AT5G51560	Arabidopsis thaliana leucine-rich repeat protein kinase-like protein (AT5G51560) mRNA, complete cds [NM_124535]
A_84_P808412	-2.77558	-1.47279	2.77558	down	HMGB2	Arabidopsis thaliana high mobility group B2 protein (HMGB2) mRNA, complete cds [NM_001035997]
A_84_P19803	-2.09106	-1.06423	2.09106	down	AT1G35510	Arabidopsis thaliana O-fucosyltransferase-like protein (AT1G35510) mRNA, complete cds [NM_103245]
A_84_P20366	-2.60919	-1.3836	2.60919	down	CR4	Arabidopsis thaliana serine/threonine-protein kinase-like protein ACR4 (CR4) mRNA, complete cds [NM_115804]
A_84_P831354	-2.11627	-1.08152	2.11627	down	AT4G17470	Arabidopsis thaliana palmitoyl-protein thioesterase (AT4G17470) mRNA, complete cds [NM_001203824]
A_84_P759606	-2.53595	-1.34253	2.53595	down	DGD1	Arabidopsis thaliana digalactosyldiacylglycerol synthase 1 (DGD1) mRNA, complete cds [NM_180230]
A_84_P829914	-2.54985	-1.35042	2.54985	down	AT1G20480	Arabidopsis thaliana 4-coumarate--CoA ligase-like 2 (AT1G20480) mRNA, complete cds [NM_101898]
A_84_P10581	-4.29876	-2.10392	4.29876	down	AT1G15410	Arabidopsis thaliana aspartate-glutamate racemase-like protein (AT1G15410) mRNA, complete cds [NM_101410]
A_84_P18774	-2.89697	-1.53455	2.89697	down	FKBP15-2	Arabidopsis thaliana FK506-binding protein 2-2 (FKBP15-2) mRNA, complete cds [NM_124234]
A_84_P257080	-6.537	-2.70863	6.537	down	AT1G10380	Arabidopsis thaliana Putative membrane lipoprotein (AT1G10380) mRNA, complete cds [NM_100912]
A_84_P15849	-2.05181	-1.0369	2.05181	down	AT5G11930	Arabidopsis thaliana glutaredoxin-C10 (AT5G11930) mRNA, complete cds [NM_121231]
A_84_P89649	-8.60436	-3.10507	8.60436	down	CYP86C2	Arabidopsis thaliana cytochrome P450, family 86, subfamily C, polypeptide 2 (CYP86C2) mRNA, complete cds [NM_113519]
A_84_P16910	-2.2256	-1.15419	2.2256	down	AT5G56720	Arabidopsis thaliana malate dehydrogenase (AT5G56720) mRNA, complete cds [NM_125055]
A_84_P16735	-2.07693	-1.05445	2.07693	down	AT4G39070	Arabidopsis thaliana B-box type zinc finger-containing protein (AT4G39070) mRNA, complete cds [NM_120067]
A_84_P23058	-5.55235	-2.4731	5.55235	down	ADK1	Arabidopsis thaliana adenosine kinase 1 (ADK1) mRNA, complete cds [NM_202540]
A_84_P10886	-23.5411	-4.55711	23.5411	down	PPa4	Arabidopsis thaliana pyrophosphorylase 4 (PPa4) mRNA, complete cds [NM_115222]
A_84_P764402	-8.92953	-3.15858	8.92953	down	TPS03	Arabidopsis thaliana (E)-beta-ocimene synthase (TPS03) mRNA, complete cds [NM_001036574]
A_84_P20340	-2.58085	-1.36784	2.58085	down	AT3G53380	Arabidopsis thaliana concanavalin A-like lectin kinase-like protein (AT3G53380) mRNA, complete cds [NM_115198]
A_84_P786068	-2.11764	-1.08246	2.11764	down	PHO1	Arabidopsis thaliana phosphate transporter PHO1 (PHO1) mRNA, complete cds [NM_113246]
A_84_P137649	-2.47813	-1.30925	2.47813	down	WAK1	Arabidopsis thaliana wall-associated receptor kinase 1 (WAK1) mRNA, complete cds [NM_101978]
A_84_P13111	-2.63171	-1.396	2.63171	down	AT5G51590	Arabidopsis thaliana AT hook motif DNA-binding family protein (AT5G51590) mRNA, complete cds [NM_124538]
A_84_P762088	-5.09587	-2.34933	5.09587	down	AT3G48344	Arabidopsis thaliana uncharacterized protein (AT3G48344) mRNA, complete cds [NM_001125321]
A_84_P819712	-4.12335	-2.04382	4.12335	down	GPAT8	Arabidopsis thaliana glycerol-3-phosphate acyltransferase (GPAT8) mRNA, complete cds [NM_116264]
A_84_P279980	-9.52205	-3.25127	9.52205	down	AT1G29440	Arabidopsis thaliana SAUR-like auxin-responsive protein (AT1G29440) mRNA, complete cds [NM_102684]
A_84_P22907	-5.49138	-2.45717	5.49138	down	THIC	Arabidopsis thaliana thiamine biosynthesis protein ThiC (THIC) mRNA, complete cds [NM_128517]
A_84_P23480	-3.16997	-1.66447	3.16997	down	AT5G42280	Arabidopsis thaliana cysteine/histidine-rich C1 domain-containing protein (AT5G42280) mRNA, complete cds [NM_123593]
A_84_P603601	-2.05468	-1.03891	2.05468	down	AT4G02850	Arabidopsis thaliana phenazine biosynthesis PhzC/PhzF family protein (AT4G02850) mRNA, complete cds [NM_116519]
A_84_P515273	-3.19669	-1.67658	3.19669	down	AT1G61255	Arabidopsis thaliana uncharacterized protein (AT1G61255) mRNA, complete cds [NM_148616]
A_84_P265400	-2.20097	-1.13814	2.20097	down	AT2G31110	Arabidopsis thaliana uncharacterized protein (AT2G31110) mRNA, complete cds [NM_001084516]
A_84_P13859	-2.10089	-1.071	2.10089	down	AT4G29240	Arabidopsis thaliana leucine-rich repeat-containing protein (AT4G29240) mRNA, complete cds [NM_119068]
A_84_P12593	-2.21195	-1.14532	2.21195	down	AT2G18560	Arabidopsis thaliana UDP-glycosyltransferase-like protein (AT2G18560) mRNA, complete cds [NM_127412]
A_84_P588433	-5.1492	-2.36435	5.1492	down	AT3G61750	Arabidopsis thaliana Cytochrome b561/ferric reductase transmembrane with DOMON related domain (AT3G61750) mRNA, complete cds [NM_116040]
A_84_P11930	-4.46421	-2.15841	4.46421	down	BAM3	Arabidopsis thaliana leucine-rich receptor-like protein kinase BAM3 (BAM3) mRNA, complete cds [NM_118146]
A_84_P808253	-2.67671	-1.42046	2.67671	down	AT5G66800	Arabidopsis thaliana uncharacterized protein (AT5G66800) mRNA, complete cds [NM_126078]
A_84_P853833	-2.72985	-1.44882	2.72985	down	AT5G06440	Arabidopsis thaliana uncharacterized protein (AT5G06440) mRNA, complete cds [NM_001203312]
A_84_P18556	-2.34178	-1.22761	2.34178	down	AT1G29070	Arabidopsis thaliana 50S ribosomal protein L34 (AT1G29070) mRNA, complete cds [NM_102648]
A_84_P95069	-5.86289	-2.55161	5.86289	down	AT2G22170	Arabidopsis thaliana PLAT-plant-stress domain-containing protein (AT2G22170) mRNA, complete cds [NM_127785]
A_84_P518042	-3.98378	-1.99414	3.98378	down	LLG2	Arabidopsis thaliana LORELEI-like glucosylphosphatidylinositol-anchored protein 2 (LLG2) mRNA, complete cds [NM_127634]
A_84_P22428	-4.32968	-2.11426	4.32968	down	BGAL3	Arabidopsis thaliana beta-galactosidase 3 (BGAL3) mRNA, complete cds [NM_119799]
A_84_P22627	-2.02314	-1.0166	2.02314	down	AT5G66470	Arabidopsis thaliana GTP-binding protein Era (AT5G66470) mRNA, complete cds [NM_126045]
A_84_P80699	-2.02243	-1.01609	2.02243	down	emb2076	Arabidopsis thaliana pentatricopeptide repeat-containing protein (emb2076) mRNA, complete cds [NM_113854]
A_84_P20503	-2.19477	-1.13407	2.19477	down	AT4G34760	Arabidopsis thaliana SAUR-like auxin-responsive protein 9 (AT4G34760) mRNA, complete cds [NM_119642]
A_84_P17337	-2.08075	-1.0571	2.08075	down	RHA2B	Arabidopsis thaliana putative E3 ubiquitin-protein ligase RHA2B (RHA2B) mRNA, complete cds [NM_126177]
A_84_P597346	-2.10486	-1.07372	2.10486	down	RTM3	Arabidopsis thaliana restricted tev movement 3 (RTM3) mRNA, complete cds [NM_115697]
A_84_P852628	-2.95684	-1.56406	2.95684	down	AT5G02600	Arabidopsis thaliana heavy metal transport/detoxification domain-containing protein (AT5G02600) mRNA, complete cds [NM_202994]
A_84_P21573	-7.73137	-2.95072	7.73137	down	AT5G38120	Arabidopsis thaliana 4-coumarate--CoA ligase-like 8 (AT5G38120) mRNA, complete cds [NM_123172]
A_84_P821249	-2.09006	-1.06354	2.09006	down	AT5G07580	Arabidopsis thaliana ERF/AP2 transcription factor (AT5G07580) mRNA, complete cds [NM_120840]
A_84_P855484	-3.0214	-1.59522	3.0214	down		Rep: Conglutin gamma-like protein - Arabidopsis thaliana (Mouse-ear cress), partial (35%) [TC396686]
A_84_P784216	-3.54548	-1.82598	3.54548	down	VSP1	Arabidopsis thaliana vegetative storage protein 1 (VSP1) mRNA, complete cds [NM_001125801]
A_84_P751914	-2.31868	-1.2133	2.31868	down	AT1G38131	Arabidopsis thaliana O-fucosyltransferase-like protein (AT1G38131) mRNA, complete cds [NM_148521]
A_84_P809332	-2.43572	-1.28435	2.43572	down	PORB	Arabidopsis thaliana protochlorophyllide reductase B (PORB) mRNA, complete cds [NM_001036654]
A_84_P13436	-2.73445	-1.45125	2.73445	down	AT1G51140	Arabidopsis thaliana transcription factor bHLH122 (AT1G51140) mRNA, complete cds [NM_103993]
A_84_P13491	-2.67634	-1.42026	2.67634	down	AT2G02020	Arabidopsis thaliana putative peptide/nitrate transporter (AT2G02020) mRNA, complete cds [NM_126263]
A_84_P603659	-2.88389	-1.52802	2.88389	down	AT4G21310	Arabidopsis thaliana uncharacterized protein (AT4G21310) mRNA, complete cds [NM_118249]
A_84_P860782	-2.79624	-1.48349	2.79624	down	LPAT5	Arabidopsis thaliana lysocardiolipin and lysophospholipid acyltransferase (LPAT5) mRNA, complete cds [NM_001084715]
A_84_P21325	-2.81798	-1.49466	2.81798	down	MRP10	Arabidopsis thaliana ABC transporter C family member 14 (MRP10) mRNA, complete cds [NM_116135]
A_84_P19998	-2.46107	-1.29928	2.46107	down	AT1G70550	Arabidopsis thaliana uncharacterized protein (AT1G70550) mRNA, complete cds [NM_105723]
A_84_P839208	-5.62846	-2.49274	5.62846	down	AT1G70260	Arabidopsis thaliana nodulin MtN21 /EamA-like transporter protein (AT1G70260) mRNA, complete cds [NM_105694]
A_84_P515482	-3.38457	-1.75897	3.38457	down	AT3G03130	Arabidopsis thaliana uncharacterized protein (AT3G03130) mRNA, complete cds [NM_111183]
A_84_P19774	-3.10591	-1.63502	3.10591	down	HA11	Arabidopsis thaliana H(+)-ATPase 11 (HA11) mRNA, complete cds [NM_125662]
A_84_P769792	-3.06877	-1.61766	3.06877	down		Rep: DNA-directed RNA polymerase subunit alpha - Arabidopsis thaliana (Mouse-ear cress), partial (81%) [TC392220]
A_84_P145939	-4.95245	-2.30814	4.95245	down	AT2G28315	Arabidopsis thaliana nucleotide/sugar transporter-like protein (AT2G28315) mRNA, complete cds [NM_179789]
A_84_P16596	-2.21674	-1.14844	2.21674	down	AT3G62820	Arabidopsis thaliana plant invertase/pectin methylesterase inhibitor domain-containing protein (AT3G62820) mRNA, complete cds [NM_116147]
A_84_P809513	-2.12222	-1.08558	2.12222	down	CA1	Arabidopsis thaliana carbonic anhydrase 1 (CA1) mRNA, complete cds [NM_111016]
A_84_P11973	-2.54229	-1.34613	2.54229	down	HMA2	Arabidopsis thaliana Cd2+/Zn2+-exporting ATPase (HMA2) mRNA, complete cds [NM_119157]
A_84_P208088	-10.5952	-3.40534	10.5952	down	AGP4	Arabidopsis thaliana arabinogalactan protein 4 (AGP4) mRNA, complete cds [NM_121081]
A_84_P22188	-4.78149	-2.25746	4.78149	down	MYB83	Arabidopsis thaliana myb domain protein 83 (MYB83) mRNA, complete cds [NM_111685]
A_84_P10551	-2.64861	-1.40524	2.64861	down	CYCB2;4	Arabidopsis thaliana cyclin-B2-4 (CYCB2;4) mRNA, complete cds [NM_106281]
A_84_P162133	-2.15214	-1.10577	2.15214	down	AT4G32290	Arabidopsis thaliana Core-2/I-branching beta-1,6-N-acetylglucosaminyltransferase family protein (AT4G32290) mRNA, complete cds [NM_119382]
A_84_P206528	-2.51906	-1.33289	2.51906	down	AT1G79110	Arabidopsis thaliana zinc ion binding protein (AT1G79110) mRNA, complete cds [NM_106562]
A_84_P52140	-3.95722	-1.98449	3.95722	down	AT1G24580	Arabidopsis thaliana RING/U-box domain-containing protein (AT1G24580) mRNA, complete cds [NM_202179]
A_84_P758465	-3.40934	-1.76949	3.40934	down	AT3G42130	Arabidopsis thaliana glycine-rich protein (AT3G42130) mRNA, complete cds [NM_114080]
A_84_P18514	-2.05463	-1.03888	2.05463	down	AT1G06000	Arabidopsis thaliana UDP-glycosyltransferase-like protein (AT1G06000) mRNA, complete cds [NM_100480]
A_84_P13090	-2.10894	-1.07652	2.10894	down	AT5G45950	Arabidopsis thaliana GDSL esterase/lipase (AT5G45950) mRNA, complete cds [NM_123963]
A_84_P816785	-2.11379	-1.07983	2.11379	down	PP2-A1	Arabidopsis thaliana protein PHLOEM protein 2-LIKE A1 (PP2-A1) mRNA, complete cds [NM_118104]
A_84_P854454	-17.6352	-4.14038	17.6352	down	AT2G10940	Arabidopsis thaliana bifunctional inhibitor/lipid-transfer protein/seed storage 2S albumin-like protein (AT2G10940) mRNA, complete cds [NM_126828]
A_84_P17921	-3.458	-1.78994	3.458	down	ASP2	Arabidopsis thaliana aspartate aminotransferase (ASP2) mRNA, complete cds [NM_121960]
A_84_P509776	-2.12395	-1.08675	2.12395	down	AT1G62310	Arabidopsis thaliana transcription factor jumonji domain-containing protein (AT1G62310) mRNA, complete cds [NM_104911]
A_84_P12861	-5.4959	-2.45836	5.4959	down	ENODL19	Arabidopsis thaliana early nodulin-like protein 19 (ENODL19) mRNA, complete cds [NM_001203782]
A_84_P821960	-2.51488	-1.33049	2.51488	down
A_84_P22546	-8.88245	-3.15096	8.88245	down	AT5G45670	Arabidopsis thaliana GDSL esterase/lipase (AT5G45670) mRNA, complete cds [NM_123934]
A_84_P847349	-4.2713	-2.09468	4.2713	down	AT4G26790	Arabidopsis thaliana GDSL esterase/lipase (AT4G26790) mRNA, complete cds [NM_118813]
A_84_P294124	-2.27623	-1.18665	2.27623	down	AT3G52360	Arabidopsis thaliana uncharacterized protein (AT3G52360) mRNA, complete cds [NM_115096]
A_84_P173941	-3.22359	-1.68867	3.22359	down	AT3G06130	Arabidopsis thaliana heavy-metal-associated domain-containing protein (AT3G06130) mRNA, complete cds [NM_111488]
A_84_P522542	-2.02656	-1.01903	2.02656	down	AT2G39240	Arabidopsis thaliana RNA polymerase I specific transcription initiation factor RRN3 protein (AT2G39240) mRNA, complete cds [NM_129482]
A_84_P14437	-3.95117	-1.98228	3.95117	down	XERICO	Arabidopsis thaliana RING/U-box domain-containing protein (XERICO) mRNA, complete cds [NM_201687]
A_84_P858206	-5.02233	-2.32836	5.02233	down	GASA4	Arabidopsis thaliana gibberellin-regulated protein 4 (GASA4) mRNA, complete cds [NM_121527]
A_84_P11414	-2.44374	-1.28909	2.44374	down	AT1G05640	Arabidopsis thaliana ankyrin repeats-containing protein (AT1G05640) mRNA, complete cds [NM_100444]
A_84_P608809	-3.13348	-1.64777	3.13348	down	AT3G22510	Arabidopsis thaliana Pre-rRNA-processing protein TSR2 (AT3G22510) mRNA, complete cds [NM_113150]
A_84_P857708	-2.79993	-1.48539	2.79993	down	KT2	Arabidopsis thaliana potassium transporter 2 (KT2) mRNA, complete cds [NM_001084563]
A_84_P554998	-5.67963	-2.5058	5.67963	down	AT5G10340	Arabidopsis thaliana F-box protein (AT5G10340) mRNA, complete cds [NM_121072]
A_84_P837916	-2.72062	-1.44394	2.72062	down	AT4G24610	Arabidopsis thaliana uncharacterized protein (AT4G24610) mRNA, complete cds [NM_001203896]
A_84_P282290	-3.31804	-1.73033	3.31804	down	AT5G61340	Arabidopsis thaliana uncharacterized protein (AT5G61340) mRNA, complete cds [NM_125527]
A_84_P11235	-2.29409	-1.19792	2.29409	down	CRR21	Arabidopsis thaliana pentatricopeptide repeat-containing protein (CRR21) mRNA, complete cds [NM_124956]
A_84_P16048	-2.47389	-1.30678	2.47389	down	EPF1	Arabidopsis thaliana protein EPIDERMAL PATTERNING FACTOR 1 (EPF1) mRNA, complete cds [NM_127657]
A_84_P24173	-4.00513	-2.00185	4.00513	down	GT72B1	Arabidopsis thaliana hydroquinone glucosyltransferase (GT72B1) mRNA, complete cds [NM_116337]
A_84_P795384	-2.93805	-1.55486	2.93805	down	MDAR1	BP666626 RAFL21 Arabidopsis thaliana cDNA clone RAFL21-20-G07 3', mRNA sequence [BP666626]
A_84_P517582	-3.6996	-1.88737	3.6996	down	AT5G10310	Arabidopsis thaliana epidermal patterning factor-like protein 1 (AT5G10310) mRNA, complete cds [NM_121069]
A_84_P568630	-4.86349	-2.28199	4.86349	down	AT2G42170	Arabidopsis thaliana putative actin (AT2G42170) mRNA, complete cds [NM_180032]
A_84_P10789	-3.73028	-1.89929	3.73028	down	NDF4	Arabidopsis thaliana NDH-dependent cyclic electron flow 1 (NDF4) mRNA, complete cds [NM_112496]
A_84_P22555	-41.789	-5.38505	41.789	down	SAUR68	Arabidopsis thaliana SAUR-like auxin-responsive protein (SAUR68) mRNA, complete cds [NM_102691]
A_84_P12342	-3.07381	-1.62003	3.07381	down	ELP	Arabidopsis thaliana extensin-like protein (ELP) mRNA, complete cds [NM_101081]
A_84_P17734	-3.71555	-1.89358	3.71555	down	LBD4	Arabidopsis thaliana LOB domain-containing protein 4 (LBD4) mRNA, complete cds [NM_102870]
A_84_P18923	-2.17015	-1.1178	2.17015	down	SUVR1	Arabidopsis thaliana histone-lysine N-methyltransferase SUVR1 (SUVR1) mRNA, complete cds [NM_100286]
A_84_P15602	-2.18323	-1.12646	2.18323	down	GLR3.6	Arabidopsis thaliana glutamate receptor 3.6 (GLR3.6) mRNA, complete cds [NM_115007]
A_84_P761753	-6.55937	-2.71356	6.55937	down		Arabidopsis thaliana clone 102688 mRNA sequence [DQ108669]
A_84_P813996	-2.24832	-1.16885	2.24832	down	AT5G02160	Arabidopsis thaliana uncharacterized protein (AT5G02160) mRNA, complete cds [NM_120294]
A_84_P290454	-5.2499	-2.39229	5.2499	down	AT5G44670	Arabidopsis thaliana uncharacterized protein (AT5G44670) mRNA, complete cds [NM_123834]
A_84_P11308	-3.07004	-1.61826	3.07004	down	AT5G13520	Arabidopsis thaliana leukotriene-A4 hydrolase (AT5G13520) mRNA, complete cds [NM_121355]
A_84_P132645	-3.96383	-1.98689	3.96383	down	AT2G20670	Arabidopsis thaliana uncharacterized protein (AT2G20670) mRNA, complete cds [NM_127631]
A_84_P818192	-2.27545	-1.18615	2.27545	down	AT5G15790	Arabidopsis thaliana RING/U-box domain-containing protein (AT5G15790) mRNA, complete cds [NM_203056]
A_84_P529024	-2.59401	-1.37519	2.59401	down	AT4G28180	Arabidopsis thaliana uncharacterized protein (AT4G28180) mRNA, complete cds [NM_118958]
A_84_P756427	-4.18876	-2.06652	4.18876	down	AT2G27420	Arabidopsis thaliana cysteine proteinase-like protein (AT2G27420) mRNA, complete cds [NM_128302]
A_84_P766392	-2.93198	-1.55188	2.93198	down
A_84_P788013	-3.90302	-1.96459	3.90302	down	AT2G42720	Arabidopsis thaliana FBD, F-box, Skp2-like and leucine rich repeat domain-containing protein (AT2G42720) mRNA, complete cds [NM_129833]
A_84_P834927	-3.14251	-1.65192	3.14251	down	AT1G63850	Arabidopsis thaliana TIR-NBS-LRR class disease resistance protein (AT1G63850) mRNA, complete cds [NM_105060]
A_84_P754226	-2.34332	-1.22856	2.34332	down	AT1G25141	Arabidopsis thaliana UDP-3-O-[3-hydroxymyristoyl] N-acetylglucosamine deacetylase (AT1G25141) mRNA, complete cds [NM_102326]
A_84_P804606	-2.01636	-1.01175	2.01636	down	AT2G33400	Arabidopsis thaliana uncharacterized protein (AT2G33400) mRNA, complete cds [NM_128900]
A_84_P868891	-6.53279	-2.7077	6.53279	down	BGLU18	Arabidopsis thaliana beta glucosidase 18 (BGLU18) mRNA, complete cds [NM_104118]
A_84_P584912	-2.98643	-1.57842	2.98643	down	AT4G06536	Arabidopsis thaliana SPla/RYanodine receptor (SPRY) domain-containing protein (AT4G06536) mRNA, complete cds [NM_178981]
A_84_P15542	-2.04611	-1.03288	2.04611	down	AT3G20480	Arabidopsis thaliana tetraacyldisaccharide 4'-kinase family protein (AT3G20480) mRNA, complete cds [NM_112940]
A_84_P819749	-3.26803	-1.70842	3.26803	down	AT2G05790	Arabidopsis thaliana O-Glycosyl hydrolases family 17 protein (AT2G05790) mRNA, complete cds [NM_126593]
A_84_P769115	-2.39674	-1.26108	2.39674	down	AT5G42053	Arabidopsis thaliana uncharacterized protein (AT5G42053) mRNA, complete cds [NM_001125885]
A_84_P799324	-2.62458	-1.39208	2.62458	down	AT4G22390	Arabidopsis thaliana F-box protein (AT4G22390) mRNA, complete cds [NM_118365]
A_84_P828701	-2.06674	-1.04736	2.06674	down	OFP13	Arabidopsis thaliana ovate family protein 13 (OFP13) mRNA, complete cds [NM_120564]
A_84_P214948	-2.17718	-1.12246	2.17718	down	AT5G08050	Arabidopsis thaliana uncharacterized protein (AT5G08050) mRNA, complete cds [NM_120887]
A_84_P11687	-3.09082	-1.62799	3.09082	down	AT3G01350	Arabidopsis thaliana putative peptide/nitrate transporter (AT3G01350) mRNA, complete cds [NM_111001]
A_84_P13787	-10.6069	-3.40693	10.6069	down	AT4G08160	Arabidopsis thaliana glycosyl hydrolase family 10 protein / carbohydrate-binding domain-containing protein (AT4G08160) mRNA, complete cds [NM_001036516]
A_84_P22755	-3.74497	-1.90495	3.74497	down	RNS3	Arabidopsis thaliana ribonuclease 3 (RNS3) mRNA, complete cds [NM_102446]
A_84_P818318	-2.63085	-1.39553	2.63085	down	AT4G27560	Arabidopsis thaliana UDP-glycosyltransferase-like protein (AT4G27560) mRNA, complete cds [NM_118891]
A_84_P800742	-2.29646	-1.19941	2.29646	down	ATCTH	Arabidopsis thaliana zinc finger CCCH domain-containing protein 23 (ATCTH) mRNA, complete cds [NM_128150]
A_84_P850014	-7.75235	-2.95463	7.75235	down
A_84_P819415	-2.50177	-1.32295	2.50177	down	AT3G17120	Arabidopsis thaliana uncharacterized protein (AT3G17120) mRNA, complete cds [NM_112588]
A_84_P784538	-2.17826	-1.12317	2.17826	down	AT3G43720	Arabidopsis thaliana bifunctional inhibitor/lipid-transfer protein/seed storage 2S albumin-like protein (AT3G43720) mRNA, complete cds [NM_001035726]
A_84_P852147	-2.15008	-1.10439	2.15008	down	AT1G31850	Arabidopsis thaliana putative methyltransferase PMT20 (AT1G31850) mRNA, complete cds [NM_102922]
A_84_P66934	-2.80701	-1.48904	2.80701	down	AT5G26630	Arabidopsis thaliana MADS-box protein AGL35 (AT5G26630) mRNA, complete cds [NM_180551]
A_84_P107372	-2.93488	-1.5533	2.93488	down	AT3G02120	Arabidopsis thaliana hydroxyproline-rich glycoprotein-like protein (AT3G02120) mRNA, complete cds [NM_111078]
A_84_P810608	-5.5654	-2.47649	5.5654	down
A_84_P21252	-6.9374	-2.7944	6.9374	down	AT3G45680	Arabidopsis thaliana major facilitator protein (AT3G45680) mRNA, complete cds [NM_114437]
A_84_P21611	-2.34806	-1.23147	2.34806	down	AT5G48320	Arabidopsis thaliana cysteine/histidine-rich C1 domain-containing protein (AT5G48320) mRNA, complete cds [NM_124207]
A_84_P10781	-2.97033	-1.57063	2.97033	down	AT3G15650	Arabidopsis thaliana phospholipase/carboxylesterase family protein (AT3G15650) mRNA, complete cds [NM_001202974]
A_84_P126931	-2.06927	-1.04912	2.06927	down	CLE16	Arabidopsis thaliana protein CLAVATA3/ESR-related 16 (CLE16) mRNA, complete cds [NM_147231]
A_84_P11216	-2.47902	-1.30977	2.47902	down	AT5G49990	Arabidopsis thaliana nucleobase-ascorbate transporter 5 (AT5G49990) mRNA, complete cds [NM_124378]
A_84_P825568	-2.06889	-1.04885	2.06889	down	ATPUP13	Arabidopsis thaliana putative purine permease 13 (ATPUP13) mRNA, complete cds [NM_116940]
A_84_P10844	-2.16493	-1.11432	2.16493	down	AT3G43720	Arabidopsis thaliana bifunctional inhibitor/lipid-transfer protein/seed storage 2S albumin-like protein (AT3G43720) mRNA, complete cds [NM_001035726]
A_84_P12115	-7.09109	-2.82601	7.09109	down	AT5G37790	Arabidopsis thaliana protein kinase family protein (AT5G37790) mRNA, complete cds [NM_123138]
A_84_P599047	-2.96388	-1.56749	2.96388	down	MSH5	Arabidopsis thaliana DNA mismatch repair protein MSH5 (MSH5) mRNA, complete cds [NM_112939]
A_84_P16082	-4.65119	-2.2176	4.65119	down	FMO GS-OX2	Arabidopsis thaliana flavin-containing monooxygenase FMO GS-OX2 (FMO GS-OX2) mRNA, complete cds [NM_104933]
A_84_P10124	-2.2069	-1.14202	2.2069	down	IAA1	Arabidopsis thaliana auxin-responsive protein IAA1 (IAA1) mRNA, complete cds [NM_117536]
A_84_P516273	-3.37963	-1.75687	3.37963	down	AT2G20590	Arabidopsis thaliana reticulon-like protein B17 (AT2G20590) mRNA, complete cds [NM_201759]
A_84_P850735	-5.81214	-2.53907	5.81214	down		Rep: Antiholin-like protein lrgA - Bacillus subtilis, partial (8%) [TC393178]
A_84_P815417	-2.99724	-1.58364	2.99724	down	CPuORF1	Arabidopsis thaliana uncharacterized protein (CPuORF1) mRNA, complete cds [NM_001124870]
A_84_P795325	-4.83897	-2.2747	4.83897	down	GASA3	BP657164 RAFL19 Arabidopsis thaliana cDNA clone RAFL19-30-B06 3', mRNA sequence [BP657164]
A_84_P797860	-3.08229	-1.624	3.08229	down	AT5G15740	Arabidopsis thaliana O-fucosyltransferase family protein (AT5G15740) mRNA, complete cds [NM_121579]
A_84_P17245	-10.256	-3.3584	10.256	down	PIP2;8	Arabidopsis thaliana putative aquaporin PIP2-8 (PIP2;8) mRNA, complete cds [NM_127238]
A_84_P536887	-2.3806	-1.25132	2.3806	down	AT3G50350	Arabidopsis thaliana uncharacterized protein (AT3G50350) mRNA, complete cds [NM_114895]
A_84_P238183	-4.89002	-2.28984	4.89002	down	AT3G23880	Arabidopsis thaliana F-box/kelch-repeat protein (AT3G23880) mRNA, complete cds [NM_113293]
A_84_P13826	-4.23017	-2.08072	4.23017	down	BGLU47	Arabidopsis thaliana beta-glucosidase 47 (BGLU47) mRNA, complete cds [NM_118296]
A_84_P65514	-2.9099	-1.54097	2.9099	down	HGL1	Arabidopsis thaliana heteroglycan glucosidase 1 (HGL1) mRNA, complete cds [NM_001125213]
A_84_P522537	-5.81936	-2.54086	5.81936	down	AT2G37000	Arabidopsis thaliana transcription factor TCP11 (AT2G37000) mRNA, complete cds [NM_129256]
A_84_P23270	-2.22078	-1.15106	2.22078	down	AT4G18250	Arabidopsis thaliana putative receptor serine/threonine kinase (AT4G18250) mRNA, complete cds [NM_117935]
A_84_P858999	-2.27218	-1.18408	2.27218	down		Rep: Peroxiredoxin-2E, chloroplast precursor - Arabidopsis thaliana (Mouse-ear cress), partial (47%) [TC399048]
A_84_P547813	-2.88082	-1.52648	2.88082	down	SUVR2	Arabidopsis thaliana histone-lysine N-methyltransferase SUVR2 (SUVR2) mRNA, complete cds [NM_001203540]
A_84_P769957	-6.69383	-2.74283	6.69383	down
A_84_P12198	-4.46435	-2.15845	4.46435	down	TMO6	Arabidopsis thaliana Dof zinc finger protein DOF5.3 (TMO6) mRNA, complete cds [NM_125413]
A_84_P754785	-6.34279	-2.66512	6.34279	down	CLE26	Arabidopsis thaliana CLAVATA3/ESR-related 26 protein (CLE26) mRNA, complete cds [NM_001124103]
A_84_P608861	-2.26609	-1.1802	2.26609	down	AT3G51230	Arabidopsis thaliana uncharacterized protein (AT3G51230) mRNA, complete cds [NM_114982]
A_84_P13556	-3.42351	-1.77547	3.42351	down	ARAC9	Arabidopsis thaliana Rac-like GTP-binding protein ARAC9 (ARAC9) mRNA, complete cds [NM_130033]
A_84_P10347	-5.20395	-2.37961	5.20395	down	AT5G17600	Arabidopsis thaliana RING-H2 finger protein ATL52 (AT5G17600) mRNA, complete cds [NM_121766]
A_84_P293514	-5.45413	-2.44735	5.45413	down	IQD11	Arabidopsis thaliana protein IQ-domain 11 (IQD11) mRNA, complete cds [NM_121349]
A_84_P786357	-2.47012	-1.30458	2.47012	down	AT5G18860	Arabidopsis thaliana inosine-uridine preferring nucleoside hydrolase family protein (AT5G18860) mRNA, complete cds [NM_121891]
A_84_P21097	-2.63178	-1.39604	2.63178	down	AT1G67820	Arabidopsis thaliana putative protein phosphatase 2C 14 (AT1G67820) mRNA, complete cds [NM_105450]
A_84_P275660	-2.8269	-1.49922	2.8269	down	AGP14	Arabidopsis thaliana arabinogalactan protein 14 (AGP14) mRNA, complete cds [NM_125037]
A_84_P12545	-2.39952	-1.26275	2.39952	down	SGR5	Arabidopsis thaliana C2H2-like zinc finger protein (SGR5) mRNA, complete cds [NM_001084399]
A_84_P20580	-2.23056	-1.1574	2.23056	down	TUB6	Arabidopsis thaliana tubulin beta-6 chain (TUB6) mRNA, complete cds [NM_121263]
A_84_P553411	-2.53409	-1.34147	2.53409	down	AT1G71870	Arabidopsis thaliana protein novel ion carrier-2 (AT1G71870) mRNA, complete cds [NM_105845]
A_84_P547662	-6.24456	-2.6426	6.24456	down	AT4G29920	Arabidopsis thaliana heat shock protein-relatedlike protein (AT4G29920) mRNA, complete cds [NM_119138]
A_84_P10395	-2.34558	-1.22995	2.34558	down	ARR7	Arabidopsis thaliana two-component response regulator ARR7 (ARR7) mRNA, complete cds [NM_101763]
A_84_P10629	-5.28747	-2.40258	5.28747	down	AT2G20680	Arabidopsis thaliana mannan endo-1,4-beta-mannosidase 2 (AT2G20680) mRNA, complete cds [NM_127632]
A_84_P16658	-2.03078	-1.02203	2.03078	down	AT4G20760	Arabidopsis thaliana Rossmann-fold NAD(P)-binding domain-containing protein (AT4G20760) mRNA, complete cds [NM_118194]
A_84_P803724	-6.36151	-2.66937	6.36151	down	AAP2	AV543237 Arabidopsis thaliana roots Columbia Arabidopsis thaliana cDNA clone RZ198b12F 3', mRNA sequence [AV543237]
A_84_P809506	-2.11611	-1.08141	2.11611	down	CA1	Arabidopsis thaliana carbonic anhydrase 1 (CA1) mRNA, complete cds [NM_111016]
A_84_P14736	-14.7272	-3.88041	14.7272	down	AT4G09120	Arabidopsis thaliana putative RING-H2 finger protein ATL36 (AT4G09120) mRNA, complete cds [NM_116981]
A_84_P810803	-2.14868	-1.10345	2.14868	down	CER10	Arabidopsis thaliana enoyl reductase (CER10) mRNA, complete cds [NM_115394]
A_84_P17452	-2.17672	-1.12216	2.17672	down	AT3G14780	Arabidopsis thaliana uncharacterized protein (AT3G14780) mRNA, complete cds [NM_112339]
A_84_P768787	-2.48892	-1.31552	2.48892	down	AT5G65580	Arabidopsis thaliana Full-length cDNA Complete sequence from clone GSLTSIL28ZH03 of Silique of strain col-0 of Arabidopsis thaliana (thale cress) [BX825316]
A_84_P197194	-51.5168	-5.68697	51.5168	down	AT4G22870	Arabidopsis thaliana leucoanthocyanidin dioxygenase (AT4G22870) mRNA, complete cds [NM_001160794]
A_84_P17016	-2.86567	-1.51887	2.86567	down	GLYR2	Arabidopsis thaliana glyoxylate reductase 2 (GLYR2) mRNA, complete cds [NM_101628]
A_84_P159275	-3.76211	-1.91154	3.76211	down	FLA1	Arabidopsis thaliana fasciclin-like arabinogalactan protein 1 (FLA1) mRNA, complete cds [NM_001203621]
A_84_P13900	-5.51845	-2.46426	5.51845	down	CYP96A12	Arabidopsis thaliana cytochrome P450, family 96, subfamily A, polypeptide 12 (CYP96A12) mRNA, complete cds [NM_120111]
A_84_P10151	-4.58298	-2.19628	4.58298	down	KCS19	Arabidopsis thaliana 3-ketoacyl-CoA synthase 21 (KCS19) mRNA, complete cds [NM_120535]
A_84_P19189	-2.23016	-1.15715	2.23016	down	AT2G42960	Arabidopsis thaliana putative receptor-like protein kinase (AT2G42960) mRNA, complete cds [NM_129858]
A_84_P22412	-2.62548	-1.39258	2.62548	down	WRKY13	Arabidopsis thaliana putative WRKY transcription factor 13 (WRKY13) mRNA, complete cds [NM_120101]
A_84_P14698	-2.11087	-1.07784	2.11087	down	AT3G61080	Arabidopsis thaliana protein kinase-like protein (AT3G61080) mRNA, complete cds [NM_115972]
A_84_P98686	-3.09526	-1.63006	3.09526	down	AT1G76620	Arabidopsis thaliana uncharacterized protein (AT1G76620) mRNA, complete cds [NM_106312]
A_84_P11132	-3.53709	-1.82256	3.53709	down	GASA4	Arabidopsis thaliana gibberellin-regulated protein 4 (GASA4) mRNA, complete cds [NM_121527]
A_84_P558846	-2.51742	-1.33195	2.51742	down	AT2G35130	Arabidopsis thaliana pentatricopeptide repeat-containing protein (AT2G35130) mRNA, complete cds [NM_001202753]
A_84_P561646	-3.32018	-1.73126	3.32018	down	AT3G28420	Arabidopsis thaliana Putative membrane lipoprotein (AT3G28420) mRNA, complete cds [NM_113762]
A_84_P795531	-2.82152	-1.49647	2.82152	down	AT1G48970	Arabidopsis thaliana mRNA for hypothetical protein, complete cds, clone: RAFL07-68-H12 [AK221530]
A_84_P193394	-3.81315	-1.93098	3.81315	down	AT3G16670	Arabidopsis thaliana Pollen Ole e 1 allergen and extensin family protein (AT3G16670) mRNA, complete cds [NM_112540]
A_84_P242043	-2.97722	-1.57397	2.97722	down	AT3G19500	Arabidopsis thaliana transcription factor bHLH113 (AT3G19500) mRNA, complete cds [NM_112837]
A_84_P23108	-2.27533	-1.18607	2.27533	down	AT3G20200	Arabidopsis thaliana Protein kinase protein with adenine nucleotide alpha hydrolases-like domain (AT3G20200) mRNA, complete cds [NM_112911]
A_84_P10829	-2.30384	-1.20404	2.30384	down	CYP90D1	Arabidopsis thaliana 3-epi-6-deoxocathasterone 23-monooxygenase (CYP90D1) mRNA, complete cds [NM_112223]
A_84_P13723	-2.09665	-1.06808	2.09665	down	AT3G53870	Arabidopsis thaliana 40S ribosomal protein S3-2 (AT3G53870) mRNA, complete cds [NM_115247]
A_84_P807614	-2.68031	-1.4224	2.68031	down	AT1G12080	Arabidopsis thaliana Vacuolar calcium-binding protein-like protein (AT1G12080) mRNA, complete cds [NM_101080]
A_84_P596907	-2.25007	-1.16997	2.25007	down	AT1G20870	Arabidopsis thaliana alpha-crystallin domain of heat shock protein-containing protein (AT1G20870) mRNA, complete cds [NM_101940]
A_84_P603728	-2.05737	-1.0408	2.05737	down	AT5G02600	Arabidopsis thaliana heavy metal transport/detoxification domain-containing protein (AT5G02600) mRNA, complete cds [NM_202994]
A_84_P523352	-2.02382	-1.01708	2.02382	down	AT2G18090	Arabidopsis thaliana PHD finger, SWIB/MDM2 and GYF domain-containing protein (AT2G18090) mRNA, complete cds [NM_179640]
A_84_P761052	-2.2046	-1.14051	2.2046	down	ACA1	Arabidopsis thaliana carbonic anhydrase (ACA1) mRNA, complete cds [NM_180354]
A_84_P16879	-2.85466	-1.51332	2.85466	down	AT5G47800	Arabidopsis thaliana Phototropic-responsive NPH3 family protein (AT5G47800) mRNA, complete cds [NM_124154]
A_84_P89789	-2.93453	-1.55313	2.93453	down	RALFL34	Arabidopsis thaliana protein ralf-like 34 (RALFL34) mRNA, complete cds [NM_126107]
A_84_P863513	-5.75874	-2.52575	5.75874	down		Rep: Ribulose bisphosphate carboxylase small chain 2B, chloroplast precursor - Arabidopsis thaliana (Mouse-ear cress), partial (37%) [TC404540]
A_84_P157735	-2.39636	-1.26085	2.39636	down	AT3G51400	Arabidopsis thaliana uncharacterized protein (AT3G51400) mRNA, complete cds [NM_114999]
A_84_P22147	-6.72571	-2.74969	6.72571	down	AT3G18490	Arabidopsis thaliana aspartyl protease family protein (AT3G18490) mRNA, complete cds [NM_112734]
A_84_P15425	-46.6034	-5.54236	46.6034	down	AT1G67750	Arabidopsis thaliana putative pectate lyase 5 (AT1G67750) mRNA, complete cds [NM_105443]
A_84_P562146	-2.17482	-1.12089	2.17482	down	AT1G19397	Arabidopsis thaliana uncharacterized protein (AT1G19397) mRNA, complete cds [NM_202138]
A_84_P236563	-5.73456	-2.51968	5.73456	down	AT2G34540	Arabidopsis thaliana uncharacterized protein (AT2G34540) mRNA, complete cds [NM_001036405]
A_84_P22471	-2.7399	-1.45412	2.7399	down	HIK	Arabidopsis thaliana ATP binding microtubule motor family protein (HIK) mRNA, complete cds [NM_101695]
A_84_P172251	-2.569	-1.36121	2.569	down	AT1G09470	Arabidopsis thaliana uncharacterized protein (AT1G09470) mRNA, complete cds [NM_001198019]
A_84_P10109	-4.12284	-2.04364	4.12284	down	GATA7	Arabidopsis thaliana GATA transcription factor 7 (GATA7) mRNA, complete cds [NM_119792]
A_84_P849797	-3.16616	-1.66273	3.16616	down		Arabidopsis thaliana mRNA for hypothetical protein, complete cds, clone: RAFL15-10-B06 [AK228488]
A_84_P11540	-3.64898	-1.8675	3.64898	down	AT1G26100	Arabidopsis thaliana cytochrome B561 domain-containing protein (AT1G26100) mRNA, complete cds [NM_102375]
A_84_P851062	-2.00898	-1.00647	2.00898	down
A_84_P91039	-2.15547	-1.10801	2.15547	down	AT1G63850	Arabidopsis thaliana TIR-NBS-LRR class disease resistance protein (AT1G63850) mRNA, complete cds [NM_105060]
A_84_P22985	-6.9945	-2.80622	6.9945	down	XTH32	Arabidopsis thaliana xyloglucan:xyloglucosyl transferase (XTH32) mRNA, complete cds [NM_129242]
A_84_P17209	-64.1282	-6.00289	64.1282	down	AT1G31690	Arabidopsis thaliana putative copper amine oxidase (AT1G31690) mRNA, complete cds [NM_102904]
A_84_P16607	-2.04876	-1.03475	2.04876	down	AT4G01450	Arabidopsis thaliana nodulin MtN21 /EamA-like transporter family protein (AT4G01450) mRNA, complete cds [NM_178949]
A_84_P532146	-4.59342	-2.19957	4.59342	down
A_84_P850547	-2.20165	-1.13859	2.20165	down		Rep: Asparagine synthetase [glutamine-hydrolyzing] - Sandersonia aurantiaca (Christmas-bells) (Chinese-lantern lily), partial (5%) [TC393092]
A_84_P812128	-2.99016	-1.58022	2.99016	down	NSP1	Arabidopsis thaliana Nitrile-specifier protein 1 (NSP1) mRNA, complete cds [NM_112511]
A_84_P21806	-2.83396	-1.50282	2.83396	down	SUC2	Arabidopsis thaliana sucrose transport protein SUC2 (SUC2) mRNA, complete cds [NM_102118]
A_84_P790292	-7.48914	-2.9048	7.48914	down	AT1G52390	Arabidopsis thaliana At1g52390 mRNA sequence [BT011876]
A_84_P857993	-2.37225	-1.24626	2.37225	down
A_84_P302670	-2.14394	-1.10026	2.14394	down	CLE22	Arabidopsis thaliana protein CLAVATA3/ESR-related 22 (CLE22) mRNA, complete cds [NM_147857]
A_84_P826132	-2.24473	-1.16654	2.24473	down	AT5G52970	Arabidopsis thaliana thylakoid lumenal protein 2 (AT5G52970) mRNA, complete cds [NM_124675]
A_84_P200834	-6.00667	-2.58656	6.00667	down	AT1G58070	Arabidopsis thaliana uncharacterized protein (AT1G58070) mRNA, complete cds [NM_104589]
A_84_P21951	-2.10895	-1.07653	2.10895	down	AT2G39900	Arabidopsis thaliana LIM domain-containing protein (AT2G39900) mRNA, complete cds [NM_129548]
A_84_P756973	-5.33759	-2.41619	5.33759	down	ZIP7	Arabidopsis thaliana zinc transporter 7 (ZIP7) mRNA, complete cds [NM_126440]
A_84_P12939	-2.27145	-1.18362	2.27145	down	MYB32	Arabidopsis thaliana transcription factor MYB32 (MYB32) mRNA, complete cds [NM_119665]
A_84_P21983	-3.08176	-1.62375	3.08176	down	AT1G29980	Arabidopsis thaliana uncharacterized protein (AT1G29980) mRNA, complete cds [NM_202209]
A_84_P166063	-4.08732	-2.03115	4.08732	down	AT4G15620	Arabidopsis thaliana uncharacterized protein (AT4G15620) mRNA, complete cds [NM_117653]
A_84_P769759	-3.67202	-1.87657	3.67202	down		Rep: Chloroplast 50S ribosomal protein L2 - Arabidopsis thaliana (Mouse-ear cress), complete [TC401427]
A_84_P798478	-2.04237	-1.03024	2.04237	down		Rep: Cell wall-plasma membrane linker protein homolog - Arabidopsis thaliana (Mouse-ear cress), partial (65%) [TC389434]
A_84_P13182	-8.81771	-3.1404	8.81771	down	IRX3	Arabidopsis thaliana cellulose synthase A catalytic subunit 7 [UDP-forming] (IRX3) mRNA, complete cds [NM_121748]
A_84_P793237	-2.43106	-1.28159	2.43106	down	TOC132	AV547656 Arabidopsis thaliana roots Columbia Arabidopsis thaliana cDNA clone RZL36h11F 3', mRNA sequence [AV547656]
A_84_P839412	-4.49302	-2.16769	4.49302	down		Rep: Chromosome chr13 scaffold_17, whole genome shotgun sequence - Vitis vinifera (Grape), partial (41%) [TC374605]
A_84_P750319	-8.73615	-3.127	8.73615	down
A_84_P292654	-2.65863	-1.41068	2.65863	down	AT3G55420	Arabidopsis thaliana uncharacterized protein (AT3G55420) mRNA, complete cds [NM_115400]
A_84_P17136	-2.17988	-1.12425	2.17988	down	RPS9	Arabidopsis thaliana 30S ribosomal protein S9 (RPS9) mRNA, complete cds [NM_106155]
A_84_P11279	-3.19681	-1.67663	3.19681	down		GB
A_84_P218238	-84.2954	-6.39738	84.2954	down	AT1G65450	Arabidopsis thaliana HXXXD-type acyl-transferase-like protein (AT1G65450) mRNA, complete cds [NM_105220]
A_84_P246035	-2.10029	-1.07059	2.10029	down	TUA2	Arabidopsis thaliana tubulin alpha-2/alpha-4 chain (TUA2) mRNA, complete cds [NM_103889]
A_84_P13533	-4.79647	-2.26197	4.79647	down	AT1G67790	Arabidopsis thaliana uncharacterized protein (AT1G67790) mRNA, complete cds [NM_105447]
A_84_P559167	-4.09828	-2.03502	4.09828	down	AT4G32000	Arabidopsis thaliana protein kinase family protein (AT4G32000) mRNA, complete cds [NM_119352]
A_84_P149348	-2.63011	-1.39512	2.63011	down	AT2G34170	Arabidopsis thaliana uncharacterized protein (AT2G34170) mRNA, complete cds [NM_128968]
A_84_P828495	-3.28426	-1.71557	3.28426	down	AT4G39630	Arabidopsis thaliana uncharacterized protein (AT4G39630) mRNA, complete cds [NM_120123]
A_84_P859317	-5.60359	-2.48635	5.60359	down	PRP4	Arabidopsis thaliana proline-rich protein 4 (PRP4) mRNA, complete cds [NM_120037]
A_84_P260410	-7.38151	-2.88392	7.38151	down	AT1G78450	Arabidopsis thaliana SOUL heme-binding-like protein (AT1G78450) mRNA, complete cds [NM_106492]
A_84_P845356	-2.09416	-1.06637	2.09416	down	RMA1	Arabidopsis thaliana E3 ubiquitin-protein ligase RMA1 (RMA1) mRNA, complete cds [NM_202777]
A_84_P827778	-2.60463	-1.38108	2.60463	down	FU	Arabidopsis thaliana Protein kinase family protein with ARM repeat domain (FU) mRNA, complete cds [NM_001084223]
A_84_P19966	-2.04522	-1.03225	2.04522	down	FLN2	Arabidopsis thaliana fructokinase-like 2 (FLN2) mRNA, complete cds [NM_105587]
A_84_P813630	-3.47188	-1.79572	3.47188	down	TUB8	Arabidopsis thaliana tubulin beta-8 chain (TUB8) mRNA, complete cds [NM_001203444]
A_84_P826352	-2.41604	-1.27265	2.41604	down	AT1G16750	Arabidopsis thaliana uncharacterized protein (AT1G16750) mRNA, complete cds [NM_101536]
A_84_P811125	-9.67356	-3.27405	9.67356	down	AT5G25460	Arabidopsis thaliana uncharacterized protein (AT5G25460) mRNA, complete cds [NM_122456]
A_84_P14515	-74.5525	-6.22019	74.5525	down	GDH3	Arabidopsis thaliana glutamate dehydrogenase (NAD(P)+) (GDH3) mRNA, complete cds [NM_111262]
A_84_P231869	-2.38904	-1.25643	2.38904	down	AT5G59350	Arabidopsis thaliana uncharacterized protein (AT5G59350) mRNA, complete cds [NM_125326]
A_84_P10199	-2.17152	-1.1187	2.17152	down	AT1G23410	Arabidopsis thaliana 40S ribosomal protein S27a-1 (AT1G23410) mRNA, complete cds [NM_102190]
A_84_P20800	-13.8859	-3.79555	13.8859	down	PRA1.F1	Arabidopsis thaliana PRA1 family protein F1 (PRA1.F1) mRNA, complete cds [NM_101632]
A_84_P544427	-2.53453	-1.34172	2.53453	down	PQL2	Arabidopsis thaliana photosystem II oxygen-evolving enhancer protein (PQL2) mRNA, complete cds [NM_202091]
A_84_P12058	-34.9863	-5.12872	34.9863	down	FLS1	Arabidopsis thaliana flavonol synthase/flavanone 3-hydroxylase (FLS1) mRNA, complete cds [NM_001203337]
A_84_P50530	-2.35309	-1.23456	2.35309	down	AT5G53710	Arabidopsis thaliana uncharacterized protein (AT5G53710) mRNA, complete cds [NM_124750]
A_84_P19713	-9.76765	-3.28801	9.76765	down	AT1G29450	Arabidopsis thaliana SAUR-like auxin-responsive protein (AT1G29450) mRNA, complete cds [NM_102685]
A_84_P11552	-2.28264	-1.19071	2.28264	down	HXK2	Arabidopsis thaliana hexokinase 2 (HXK2) mRNA, complete cds [NM_001084452]
A_84_P186234	-2.62199	-1.39066	2.62199	down	AT3G25590	Arabidopsis thaliana uncharacterized protein (AT3G25590) mRNA, complete cds [NM_113457]
A_84_P13089	-2.52531	-1.33646	2.52531	down
A_84_P10611	-2.13308	-1.09294	2.13308	down	AT2G43530	Arabidopsis thaliana defensin-like protein 194 (AT2G43530) mRNA, complete cds [NM_129914]
A_84_P225429	-2.17586	-1.12158	2.17586	down	AT5G25590	Arabidopsis thaliana uncharacterized protein (AT5G25590) mRNA, complete cds [NM_122470]
A_84_P579374	-4.88464	-2.28825	4.88464	down	AT3G06035	Arabidopsis thaliana glycoprotein membrane precursor GPI-anchored protein (AT3G06035) mRNA, complete cds [NM_111478]
A_84_P67974	-5.27042	-2.39792	5.27042	down	OFP6	Arabidopsis thaliana ovate family protein 6 (OFP6) mRNA, complete cds [NM_148870]
A_84_P14408	-2.57075	-1.36219	2.57075	down	AT2G16990	Arabidopsis thaliana major facilitator protein (AT2G16990) mRNA, complete cds [NM_001036283]
A_84_P15126	-2.21257	-1.14572	2.21257	down	AT1G69160	Arabidopsis thaliana uncharacterized protein (AT1G69160) mRNA, complete cds [NM_105583]
A_84_P823856	-3.30814	-1.72602	3.30814	down	SPX4	Arabidopsis thaliana SPX domain-containing protein 4 (SPX4) mRNA, complete cds [NM_121537]
A_84_P200494	-2.07169	-1.05081	2.07169	down	AT5G40960	Arabidopsis thaliana uncharacterized protein (AT5G40960) mRNA, complete cds [NM_123461]
A_84_P75224	-2.55945	-1.35583	2.55945	down		Rep: F-box/LRR-repeat protein At3g58980 - Arabidopsis thaliana (Mouse-ear cress), complete [TC364526]
A_84_P838689	-2.60717	-1.38248	2.60717	down	ERD9	Arabidopsis thaliana glutathione S-transferase (ERD9) mRNA, complete cds [NM_100911]
A_84_P830382	-4.75574	-2.24967	4.75574	down
A_84_P12410	-2.79095	-1.48076	2.79095	down	AT1G75090	Arabidopsis thaliana DNA-3-methyladenine glycosylase I (AT1G75090) mRNA, complete cds [NM_106165]
A_84_P285010	-7.87849	-2.97792	7.87849	down	PGSIP1	Arabidopsis thaliana plant glycogenin-like starch initiation protein 1 (PGSIP1) mRNA, complete cds [NM_112752]
A_84_P296824	-2.43431	-1.28351	2.43431	down	AT3G15450	Arabidopsis thaliana aluminum induced protein with YGL and LRDR motif (AT3G15450) mRNA, complete cds [NM_001035625]
A_84_P786422	-2.30861	-1.20702	2.30861	down	EDL3	Arabidopsis thaliana EID1-like F-box protein 3 (EDL3) mRNA, complete cds [NM_116171]
A_84_P20033	-3.82748	-1.93639	3.82748	down	PIN6	Arabidopsis thaliana putative auxin efflux carrier component 6 (PIN6) mRNA, complete cds [NM_106361]
A_84_P21186	-2.5283	-1.33817	2.5283	down	AT3G21670	Arabidopsis thaliana major facilitator protein (AT3G21670) mRNA, complete cds [NM_113062]
A_84_P19810	-2.16157	-1.11208	2.16157	down	LTPG1	Arabidopsis thaliana glycosylphosphatidylinositol-anchored lipid protein transfer 1 (LTPG1) mRNA, complete cds [NM_102560]
A_84_P90469	-2.92337	-1.54763	2.92337	down	CYP79F1	Arabidopsis thaliana dihomomethionine N-hydroxylase (CYP79F1) mRNA, complete cds [NM_101507]
A_84_P13586	-2.21261	-1.14575	2.21261	down	AT3G10680	Arabidopsis thaliana heat shock-related protein (AT3G10680) mRNA, complete cds [NM_111904]
A_84_P148358	-3.23166	-1.69228	3.23166	down	AT3G62630	Arabidopsis thaliana uncharacterized protein (AT3G62630) mRNA, complete cds [NM_116128]
A_84_P811769	-6.22238	-2.63747	6.22238	down	ESP	Arabidopsis thaliana epithiospecifier protein (ESP) mRNA, complete cds [NM_180632]
A_84_P104616	-2.14631	-1.10186	2.14631	down	AT3G26460	Arabidopsis thaliana SRPBCC ligand-binding domain-containing protein (AT3G26460) mRNA, complete cds [NM_113553]
A_84_P15700	-2.71202	-1.43937	2.71202	down	AT4G13710	Arabidopsis thaliana pectate lyase (AT4G13710) mRNA, complete cds [NM_117445]
A_84_P198594	-6.59472	-2.72131	6.59472	down	AT1G11850	Arabidopsis thaliana uncharacterized protein (AT1G11850) mRNA, complete cds [NM_001084052]
A_84_P858746	-2.97365	-1.57223	2.97365	down	PDLP7	Arabidopsis thaliana cysteine-rich repeat secretory protein 60 (PDLP7) mRNA, complete cds [NM_001085206]
A_84_P11954	-2.11122	-1.07808	2.11122	down	PGP2	Arabidopsis thaliana P-glycoprotein 2 (PGP2) mRNA, complete cds [NM_118729]
A_84_P757054	-3.32903	-1.7351	3.32903	down	AT2G13820	Arabidopsis thaliana Non-specific lipid-transfer protein-like protein (AT2G13820) mRNA, complete cds [NM_201721]
A_84_P838518	-3.20428	-1.68	3.20428	down	AT1G50280	Arabidopsis thaliana phototropic-responsive NPH3-like protein (AT1G50280) mRNA, complete cds [NM_103912]
A_84_P10924	-4.32548	-2.11286	4.32548	down	BGLU7	Arabidopsis thaliana beta glucosidase 7 (BGLU7) mRNA, complete cds [NM_116139]
A_84_P850685	-2.01929	-1.01385	2.01929	down		Arabidopsis thaliana mRNA for hypothetical protein, clone: RAFL09-46-D22 [AK227018]
A_84_P784921	-4.56628	-2.19102	4.56628	down	MYB58	Arabidopsis thaliana myb domain protein 58 (MYB58) mRNA, complete cds [NM_101514]
A_84_P10054	-4.3592	-2.12406	4.3592	down	CSLG3	Arabidopsis thaliana cellulose synthase-like protein G3 (CSLG3) mRNA, complete cds [NM_118531]
A_84_P205528	-2.07502	-1.05312	2.07502	down	AT2G05830	Arabidopsis thaliana NagB/RpiA/CoA transferase-like protein (AT2G05830) mRNA, complete cds [NM_001084414]
A_84_P94599	-2.63174	-1.39602	2.63174	down	AT3G56290	Arabidopsis thaliana uncharacterized protein (AT3G56290) mRNA, complete cds [NM_115487]
A_84_P849831	-2.55278	-1.35207	2.55278	down	CRR23	Arabidopsis thaliana inorganic carbon transport protein-related protein (CRR23) mRNA, complete cds [NM_105744]
A_84_P826876	-7.27832	-2.86361	7.27832	down	FLA15	Arabidopsis thaliana fasciclin-like arabinogalactan protein 15 (FLA15) mRNA, complete cds [NM_115097]
A_84_P857032	-2.85191	-1.51193	2.85191	down	PRK	Arabidopsis thaliana phosphoribulokinase (PRK) mRNA, complete cds [NM_102940]
A_84_P861370	-3.63214	-1.86082	3.63214	down		Rep: Uncharacterized protein At4g24220.2 - Arabidopsis thaliana (Mouse-ear cress), partial (70%) [TC401279]
A_84_P751955	-2.88572	-1.52893	2.88572	down	AT1G12080	Arabidopsis thaliana Vacuolar calcium-binding protein-like protein (AT1G12080) mRNA, complete cds [NM_101080]
A_84_P23692	-3.03971	-1.60394	3.03971	down	KCS2	Arabidopsis thaliana 3-ketoacyl-CoA synthase 17 (KCS2) mRNA, complete cds [NM_100303]
A_84_P751260	-2.54723	-1.34893	2.54723	down		Arabidopsis thaliana mRNA for hypothetical protein, partial cds, clone: RAFL16-07-D04 [AK228733]
A_84_P275860	-2.17678	-1.12219	2.17678	down	AT1G10330	Arabidopsis thaliana pentatricopeptide repeat-containing protein (AT1G10330) mRNA, complete cds [NM_100907]
A_84_P814184	-2.68751	-1.42627	2.68751	down		Rep: Chromosome chr2 scaffold_11, whole genome shotgun sequence - Vitis vinifera (Grape), partial (32%) [TC394762]
A_84_P264150	-2.38147	-1.25185	2.38147	down	AT1G27410	Arabidopsis thaliana DNA repair metallo-beta-lactamase family protein (AT1G27410) mRNA, complete cds [NM_102504]
A_84_P14999	-6.57969	-2.71802	6.57969	down	AT1G64370	Arabidopsis thaliana uncharacterized protein (AT1G64370) mRNA, complete cds [NM_105112]
A_84_P257430	-3.9449	-1.97999	3.9449	down	AT5G66800	Arabidopsis thaliana uncharacterized protein (AT5G66800) mRNA, complete cds [NM_126078]
A_84_P275630	-2.70274	-1.43442	2.70274	down	AT5G04000	Arabidopsis thaliana uncharacterized protein (AT5G04000) mRNA, complete cds [NM_120482]
A_84_P754151	-3.29938	-1.72219	3.29938	down	AT1G26761	Arabidopsis thaliana Arabinanase/levansucrase/invertase (AT1G26761) mRNA, complete cds [NM_001123885]
A_84_P750667	-2.17641	-1.12195	2.17641	down	AT1G11540	Arabidopsis thaliana Sulfite exporter TauE/SafE family protein (AT1G11540) mRNA, complete cds [NM_101027]
A_84_P518116	-5.27696	-2.39971	5.27696	down	AT2G41610	Arabidopsis thaliana uncharacterized protein (AT2G41610) mRNA, complete cds [NM_129724]
A_84_P10198	-2.36076	-1.23925	2.36076	down	AT5G22920	Arabidopsis thaliana ring finger and CHY zinc finger domain-containing protein 1 (AT5G22920) mRNA, complete cds [NM_122198]
A_84_P248605	-2.75752	-1.46337	2.75752	down	CYP71B21	Arabidopsis thaliana cytochrome P450 71B21 (CYP71B21) mRNA, complete cds [NM_113526]
A_84_P819429	-2.49705	-1.32023	2.49705	down	BPEp	Arabidopsis thaliana transcription factor BPE (BPEp) mRNA, complete cds [NM_104657]
A_84_P836158	-3.82279	-1.93462	3.82279	down	AT5G61100	Arabidopsis thaliana uncharacterized protein (AT5G61100) mRNA, complete cds [NM_125503]
A_84_P795558	-2.16311	-1.11311	2.16311	down	ACL	BP782296 RAFL7 Arabidopsis thaliana cDNA clone RAFL07-81-K15 3', mRNA sequence [BP782296]
A_84_P792024	-6.24977	-2.6438	6.24977	down	AT3G05180	Arabidopsis thaliana GDSL esterase/lipase (AT3G05180) mRNA, complete cds [NM_111391]
A_84_P735670	-5.80292	-2.53678	5.80292	down	AT1G53030	AYAAE04TRB pooled cDNA populations Arabidopsis thaliana cDNA, mRNA sequence [EG443075]
A_84_P23267	-4.04925	-2.01765	4.04925	down	AT4G13600	Arabidopsis thaliana carbohydrate-binding X8 domain-containing protein (AT4G13600) mRNA, complete cds [NM_117434]
A_84_P18494	-7.83114	-2.96922	7.83114	down	NAC007	Arabidopsis thaliana NAC domain-containing protein 7 (NAC007) mRNA, complete cds [NM_101098]
A_84_P856901	-4.22664	-2.07951	4.22664	down	AT5G16030	Arabidopsis thaliana uncharacterized protein (AT5G16030) mRNA, complete cds [NM_121608]
A_84_P16587	-2.68421	-1.4245	2.68421	down	GATA4	Arabidopsis thaliana GATA transcription factor 4 (GATA4) mRNA, complete cds [NM_115917]
A_84_P572089	-3.67893	-1.87928	3.67893	down	AT1G78990	Arabidopsis thaliana HXXXD-type acyl-transferase (AT1G78990) mRNA, complete cds [NM_106548]
A_84_P826337	-2.54327	-1.34668	2.54327	down	AT2G12462	Arabidopsis thaliana uncharacterized protein (AT2G12462) mRNA, complete cds [NM_001036271]
A_84_P240075	-2.46232	-1.30002	2.46232	down	AT5G51670	Arabidopsis thaliana uncharacterized protein (AT5G51670) mRNA, complete cds [NM_124546]
A_84_P836797	-3.10402	-1.63414	3.10402	down	AIR9	Arabidopsis thaliana Outer arm dynein light chain 1 protein (AIR9) mRNA, complete cds [NM_129022]
A_84_P803276	-2.31739	-1.2125	2.31739	down		BP822426 RAFL19 Arabidopsis thaliana cDNA clone RAFL22-61-H09 5', mRNA sequence [BP822426]
A_84_P17224	-5.52925	-2.46708	5.52925	down	AT2G19810	Arabidopsis thaliana zinc finger CCCH domain-containing protein 20 (AT2G19810) mRNA, complete cds [NM_127539]
A_84_P18718	-5.33122	-2.41447	5.33122	down	GATA12	Arabidopsis thaliana GATA transcription factor 12 (GATA12) mRNA, complete cds [NM_122484]
A_84_P11448	-3.08709	-1.62625	3.08709	down	ICS2	Arabidopsis thaliana Isochorismate synthase 2 (ICS2) mRNA, complete cds [NM_101744]
A_84_P851378	-2.4603	-1.29883	2.4603	down	AT1G09310	Arabidopsis thaliana uncharacterized protein (AT1G09310) mRNA, complete cds [NM_100801]
A_84_P22872	-3.5847	-1.84185	3.5847	down	AT1G78940	Arabidopsis thaliana adenine nucleotide alpha hydrolases-domain containing protein kinase (AT1G78940) mRNA, complete cds [NM_106543]
A_84_P528833	-2.34816	-1.23153	2.34816	down	AT3G16660	Arabidopsis thaliana Pollen Ole e 1 allergen and extensin family protein (AT3G16660) mRNA, complete cds [NM_112539]
A_84_P18273	-2.03192	-1.02284	2.03192	down	AT2G42290	Arabidopsis thaliana leucine-rich repeat-like protein (AT2G42290) mRNA, complete cds [NM_129791]
A_84_P140239	-2.8957	-1.53391	2.8957	down	AT5G02580	Arabidopsis thaliana uncharacterized protein (AT5G02580) mRNA, complete cds [NM_202993]
A_84_P14774	-9.18618	-3.19946	9.18618	down	AT4G22610	Arabidopsis thaliana bifunctional inhibitor/lipid-transfer protein/seed storage 2S albumin-like protein (AT4G22610) mRNA, complete cds [NM_118387]
A_84_P703501	-5.96817	-2.57729	5.96817	down	AT4G13992	Arabidopsis thaliana cysteine/histidine-rich C1 domain-containing protein (AT4G13992) mRNA, complete cds [NM_001125505]
A_84_P19484	-2.01971	-1.01415	2.01971	down	CYP83A1	Arabidopsis thaliana cytochrome P450 83A1 (CYP83A1) mRNA, complete cds [NM_117451]
A_84_P814445	-2.20275	-1.1393	2.20275	down	AT1G35680	Arabidopsis thaliana 50S ribosomal protein L21 (AT1G35680) mRNA, complete cds [NM_103272]
A_84_P291544	-14.431	-3.8511	14.431	down	AT4G00890	Arabidopsis thaliana proline-rich family protein (AT4G00890) mRNA, complete cds [NM_116315]
A_84_P11075	-5.19904	-2.37825	5.19904	down	AT4G16140	Arabidopsis thaliana proline-rich family protein (AT4G16140) mRNA, complete cds [NM_117707]
A_84_P863099	-2.20908	-1.14345	2.20908	down	SVB	Arabidopsis thaliana uncharacterized protein (SVB) mRNA, complete cds [NM_104535]
A_84_P511310	-8.30846	-3.05458	8.30846	down	AT4G32785	Arabidopsis thaliana uncharacterized protein (AT4G32785) mRNA, complete cds [NM_202938]
A_84_P867244	-2.79998	-1.48542	2.79998	down	AT5G44550	Arabidopsis thaliana uncharacterized protein (AT5G44550) mRNA, complete cds [NM_123822]
A_84_P514938	-2.54312	-1.3466	2.54312	down	AT5G19875	Arabidopsis thaliana uncharacterized protein (AT5G19875) mRNA, complete cds [NM_121994]
A_84_P857259	-2.30697	-1.206	2.30697	down	AT1G09310	Arabidopsis thaliana uncharacterized protein (AT1G09310) mRNA, complete cds [NM_100801]
A_84_P13212	-3.13736	-1.64955	3.13736	down		Rep: Cysteine protease-related - Arabidopsis thaliana (Mouse-ear cress), partial (96%) [TC398032]
A_84_P10732	-2.29975	-1.20148	2.29975	down	AT2G33800	Arabidopsis thaliana 30S ribosomal protein S5 (AT2G33800) mRNA, complete cds [NM_128939]
A_84_P11239	-8.40985	-3.07208	8.40985	down	AT5G56840	Arabidopsis thaliana myb-like transcription factor family protein (AT5G56840) mRNA, complete cds [NM_125067]
A_84_P566307	-2.0004	-1.00029	2.0004	down	AT5G06790	Arabidopsis thaliana uncharacterized protein (AT5G06790) mRNA, complete cds [NM_120762]
A_84_P94979	-5.49849	-2.45904	5.49849	down	AT5G18060	Arabidopsis thaliana SAUR-like auxin-responsive protein (AT5G18060) mRNA, complete cds [NM_121811]
A_84_P830012	-2.8221	-1.49677	2.8221	down
A_84_P799589	-2.23078	-1.15755	2.23078	down	AT2G43500	Arabidopsis thaliana RWP-RK domain-containing protein (AT2G43500) mRNA, complete cds [NM_001161101]
A_84_P139909	-4.74277	-2.24573	4.74277	down	AT5G49100	Arabidopsis thaliana uncharacterized protein (AT5G49100) mRNA, complete cds [NM_124287]
A_84_P861883	-2.17374	-1.12018	2.17374	down		Rep: Chlorophyll a-b binding protein 165/180, chloroplast precursor - Arabidopsis thaliana (Mouse-ear cress), partial (33%) [TC402889]
A_84_P576008	-2.06458	-1.04585	2.06458	down	AT4G16400	Arabidopsis thaliana uncharacterized protein (AT4G16400) mRNA, complete cds [NM_117735]
A_84_P11207	-9.04012	-3.17634	9.04012	down	AT1G29500	Arabidopsis thaliana SAUR-like auxin-responsive protein (AT1G29500) mRNA, complete cds [NM_102690]
A_84_P103766	-20.5736	-4.36272	20.5736	down	AT3G05730	Arabidopsis thaliana defensin-like protein 205 (AT3G05730) mRNA, complete cds [NM_111447]
A_84_P790360	-2.79481	-1.48275	2.79481	down		BX839012 Arabidopsis thaliana Adult vegetative tissue Col-0 Arabidopsis thaliana cDNA clone GSLTLS27ZE07 5PRIM, mRNA sequence [BX839012]
A_84_P12793	-2.02911	-1.02085	2.02911	down	AT3G57190	Arabidopsis thaliana putative peptide chain release factor (AT3G57190) mRNA, complete cds [NM_115579]
A_84_P11622	-5.71529	-2.51483	5.71529	down	LAX2	Arabidopsis thaliana auxin transporter-like protein 2 (LAX2) mRNA, complete cds [NM_127675]
A_84_P197134	-2.24764	-1.16841	2.24764	down	AT5G16250	Arabidopsis thaliana uncharacterized protein (AT5G16250) mRNA, complete cds [NM_121630]
A_84_P13191	-3.44096	-1.78281	3.44096	down	AT5G21100	Arabidopsis thaliana L-ascorbate oxidase (AT5G21100) mRNA, complete cds [NM_122118]
A_84_P812398	-2.49765	-1.32057	2.49765	down	RPL15	Arabidopsis thaliana 50S ribosomal protein L15 (RPL15) mRNA, complete cds [NM_113496]
A_84_P837596	-18.1857	-4.18473	18.1857	down	FLS4	Arabidopsis thaliana flavonol synthase 4 (FLS4) mRNA, complete cds [NM_148158]
A_84_P14327	-7.16222	-2.84041	7.16222	down	TPPB	Arabidopsis thaliana trehalose-6-phosphate phosphatase (TPPB) mRNA, complete cds [NM_106458]
A_84_P801073	-2.62783	-1.39387	2.62783	down
A_84_P23733	-2.63104	-1.39563	2.63104	down	APT2	Arabidopsis thaliana adenine phosphoribosyltransferase 2 (APT2) mRNA, complete cds [NM_106654]
A_84_P518112	-3.34688	-1.74282	3.34688	down	AT2G40480	Arabidopsis thaliana uncharacterized protein (AT2G40480) mRNA, complete cds [NM_129610]
A_84_P836558	-2.1793	-1.12387	2.1793	down	RIP5	Arabidopsis thaliana interactor of constitutive active ROPs 3 (RIP5) mRNA, complete cds [NM_001203650]
A_84_P20858	-6.52754	-2.70654	6.52754	down	AT1G60360	Arabidopsis thaliana RING/U-box domain-containing protein (AT1G60360) mRNA, complete cds [NM_104723]
A_84_P804582	-2.11988	-1.08398	2.11988	down	DOT1	Arabidopsis thaliana glycine-rich protein (DOT1) mRNA, complete cds [NM_129171]
A_84_P248875	-4.20849	-2.0733	4.20849	down	AIL5	Arabidopsis thaliana AP2-like ethylene-responsive transcription factor AIL5 (AIL5) mRNA, complete cds [NM_125122]
A_84_P11549	-4.50184	-2.17052	4.50184	down	AT2G30560	Arabidopsis thaliana glycine-rich protein (AT2G30560) mRNA, complete cds [NM_128608]
A_84_P592948	-2.26565	-1.17993	2.26565	down	AT4G11911	Arabidopsis thaliana uncharacterized protein (AT4G11911) mRNA, complete cds [NM_001125495]
A_84_P15346	-2.00079	-1.00057	2.00079	down	AT2G15680	Arabidopsis thaliana calmodulin-like protein 1 (AT2G15680) mRNA, complete cds [NM_127129]
A_84_P292434	-6.32971	-2.66214	6.32971	down	AGP26	Arabidopsis thaliana arabinogalactan protein 26 (AGP26) mRNA, complete cds [NM_130360]
A_84_P15051	-4.45847	-2.15655	4.45847	down	NPH3	Arabidopsis thaliana root phototropism protein 3 (NPH3) mRNA, complete cds [NM_125829]
A_84_P151828	-2.33406	-1.22284	2.33406	down	AT5G58250	Arabidopsis thaliana uncharacterized protein (AT5G58250) mRNA, complete cds [NM_125210]
A_84_P832800	-2.04961	-1.03535	2.04961	down	AT4G35270	Arabidopsis thaliana RWP-RK domain-containing protein (AT4G35270) mRNA, complete cds [NM_119693]
A_84_P20190	-6.92083	-2.79094	6.92083	down	AT3G05180	Arabidopsis thaliana GDSL esterase/lipase (AT3G05180) mRNA, complete cds [NM_111391]
A_84_P802658	-3.21318	-1.684	3.21318	down	HDS	Arabidopsis thaliana 4-hydroxy-3-methylbut-2-enyl diphosphate synthase (HDS) mRNA, complete cds [NM_125453]
A_84_P598916	-6.33714	-2.66383	6.33714	down	AT2G30300	Arabidopsis thaliana major facilitator protein (AT2G30300) mRNA, complete cds [NM_128583]
A_84_P766618	-2.66606	-1.41471	2.66606	down	AT5G27300	Arabidopsis thaliana pentatricopeptide (PPR) repeat-containing protein (AT5G27300) mRNA, complete cds [NM_122612]
A_84_P14433	-2.82561	-1.49856	2.82561	down	GH9B8	Arabidopsis thaliana endoglucanase 11 (GH9B8) mRNA, complete cds [NM_128859]
A_84_P787318	-3.17651	-1.66744	3.17651	down	AT4G37295	Arabidopsis thaliana uncharacterized protein (AT4G37295) mRNA, complete cds [NM_119893]
A_84_P224159	-11.8653	-3.56868	11.8653	down	AT3G42786	Arabidopsis thaliana uncharacterized protein (AT3G42786) mRNA, complete cds [NM_148810]
A_84_P10695	-2.36595	-1.24242	2.36595	down	FXG1	Arabidopsis thaliana alpha-L-fucosidase 3 (FXG1) mRNA, complete cds [NM_105451]
A_84_P122882	-2.24529	-1.1669	2.24529	down	AT2G32430	Arabidopsis thaliana putative beta-1,3-galactosyltransferase 3 (AT2G32430) mRNA, complete cds [NM_128802]
A_84_P751365	-5.28489	-2.40187	5.28489	down	TLL1	Arabidopsis thaliana triacylglycerol lipase-like 1 protein (TLL1) mRNA, complete cds [NM_202246]
A_84_P11330	-3.30037	-1.72263	3.30037	down	XTH8	Arabidopsis thaliana xyloglucan:xyloglucosyl transferase (XTH8) mRNA, complete cds [NM_101028]
A_84_P17118	-2.09054	-1.06388	2.09054	down	CYCA2;3	Arabidopsis thaliana cyclin-A2-3 (CYCA2;3) mRNA, complete cds [NM_101426]
A_84_P136225	-3.14629	-1.65365	3.14629	down	AT2G32560	Arabidopsis thaliana F-box protein (AT2G32560) mRNA, complete cds [NM_179860]
A_84_P825500	-2.96282	-1.56697	2.96282	down	VLN1	Arabidopsis thaliana villin-1 (VLN1) mRNA, complete cds [NM_001036367]
A_84_P860810	-4.51169	-2.17367	4.51169	down	LTP6	Arabidopsis thaliana non-specific lipid-transfer protein 6 (LTP6) mRNA, complete cds [NM_111711]
A_84_P757702	-4.16211	-2.05731	4.16211	down	LCR51	Arabidopsis thaliana defensin-like protein 108 (LCR51) mRNA, complete cds [NM_001084565]
A_84_P831464	-3.24222	-1.69698	3.24222	down	AT5G62960	Arabidopsis thaliana uncharacterized protein (AT5G62960) mRNA, complete cds [NM_125690]
A_84_P17578	-2.12412	-1.08686	2.12412	down	AT4G10270	Arabidopsis thaliana putative wound-responsive protein (AT4G10270) mRNA, complete cds [NM_117095]
A_84_P23067	-2.65856	-1.41064	2.65856	down	POK1	Arabidopsis thaliana phragmoplast orienting kinesin 1 (POK1) mRNA, complete cds [NM_112614]
A_84_P10178	-5.45203	-2.44679	5.45203	down	AT5G12050	Arabidopsis thaliana uncharacterized protein (AT5G12050) mRNA, complete cds [NM_121243]
A_84_P19687	-41.0177	-5.35817	41.0177	down	PRE1	Arabidopsis thaliana basic helix-loop-helix (bHLH) DNA-binding family protein (PRE1) mRNA, complete cds [NM_123349]
A_84_P15767	-2.50052	-1.32223	2.50052	down	PME44	Arabidopsis thaliana pectinesterase 44 (PME44) mRNA, complete cds [NM_119476]
A_84_P23644	-4.20885	-2.07343	4.20885	down	AT1G08340	Arabidopsis thaliana Rho GTPase activating protein with PAK-box/P21-Rho-binding domain (AT1G08340) mRNA, complete cds [NM_100707]
A_84_P18265	-4.45678	-2.156	4.45678	down	AT2G18480	Arabidopsis thaliana putative polyol transporter 3 (AT2G18480) mRNA, complete cds [NM_127404]
A_84_P14023	-3.82033	-1.9337	3.82033	down	AT5G42720	Arabidopsis thaliana Glycosyl hydrolase family 17 protein (AT5G42720) mRNA, complete cds [NM_123636]
A_84_P836333	-2.3189	-1.21344	2.3189	down	AT3G22150	Arabidopsis thaliana pentatricopeptide repeat-containing protein (AT3G22150) mRNA, complete cds [NM_113112]
A_84_P243525	-2.11426	-1.08015	2.11426	down	AT5G65040	Arabidopsis thaliana uncharacterized protein (AT5G65040) mRNA, complete cds [NM_125903]
A_84_P18052	-2.45551	-1.29602	2.45551	down	AT1G72810	Arabidopsis thaliana threonine synthase 2 (AT1G72810) mRNA, complete cds [NM_105939]
A_84_P790750	-5.35089	-2.41978	5.35089	down	AT3G62990	Arabidopsis thaliana uncharacterized protein (AT3G62990) mRNA, complete cds [NM_116164]
A_84_P796242	-2.85804	-1.51503	2.85804	down	AT5G38120	11451355 CERES-AN65 Arabidopsis thaliana cDNA clone 1355335 3', mRNA sequence [DR384226]
A_84_P757886	-3.33301	-1.73683	3.33301	down		Arabidopsis thaliana Full-length cDNA Complete sequence from clone GSLTLS3ZG10 of Adult vegetative tissue of strain col-0 of Arabidopsis thaliana (thale cress) [BX815183]
A_84_P575512	-3.98695	-1.99529	3.98695	down	AT1G26290	Arabidopsis thaliana uncharacterized protein (AT1G26290) mRNA, complete cds [NM_102393]
A_84_P22963	-2.27196	-1.18394	2.27196	down	ALB3	Arabidopsis thaliana inner membrane protein ALBINO3 (ALB3) mRNA, complete cds [NM_001202697]
A_84_P546682	-4.69979	-2.2326	4.69979	down	JLO	Arabidopsis thaliana LOB domain-containing protein 30 (JLO) mRNA, complete cds [NM_116239]
A_84_P266650	-14.6042	-3.86831	14.6042	down	AT3G54510	Arabidopsis thaliana Early-responsive to dehydration stress protein (ERD4) (AT3G54510) mRNA, complete cds [NM_115308]
A_84_P178184	-11.4654	-3.51922	11.4654	down	LNG1	Arabidopsis thaliana protein longifolia1 (LNG1) mRNA, complete cds [NM_121562]
A_84_P23072	-2.64511	-1.40333	2.64511	down	AT1G26500	Arabidopsis thaliana pentatricopeptide repeat-containing protein (AT1G26500) mRNA, complete cds [NM_102412]
A_84_P785814	-5.90312	-2.56148	5.90312	down	AT4G11290	Arabidopsis thaliana peroxidase 39 (AT4G11290) mRNA, complete cds [NM_117200]
A_84_P811165	-7.16826	-2.84162	7.16826	down	GH9C2	Arabidopsis thaliana endoglucanase 6 (GH9C2) mRNA, complete cds [NM_105114]
A_84_P172771	-2.62195	-1.39064	2.62195	down	AT5G06930	Arabidopsis thaliana uncharacterized protein (AT5G06930) mRNA, complete cds [NM_120775]
A_84_P15342	-2.62465	-1.39213	2.62465	down	AT2G41820	Arabidopsis thaliana Leucine-rich repeat protein kinase-like protein (AT2G41820) mRNA, complete cds [NM_129746]
A_84_P753793	-8.77729	-3.13378	8.77729	down	MLP28	Arabidopsis thaliana MLP-like protein 28 (MLP28) mRNA, complete cds [NM_001084337]
A_84_P556217	-4.91415	-2.29694	4.91415	down	AT2G38995	Arabidopsis thaliana O-acyltransferase (WSD1-like) family protein (AT2G38995) mRNA, complete cds [NM_179976]
A_84_P12487	-25.2776	-4.65979	25.2776	down	AT1G14390	Arabidopsis thaliana putative leucine-rich repeat transmembrane protein kinase (AT1G14390) mRNA, complete cds [NM_101306]
A_84_P144289	-4.5023	-2.17066	4.5023	down	AT4G29770	Arabidopsis thaliana uncharacterized protein (AT4G29770) mRNA, complete cds [NM_001160805]
A_84_P18751	-2.29948	-1.20131	2.29948	down	AT1G68570	Arabidopsis thaliana putative nitrite transporter (AT1G68570) mRNA, complete cds [NM_105528]
A_84_P20916	-2.21143	-1.14498	2.21143	down	VND7	Arabidopsis thaliana vascular related NAC-domain protein 7 (VND7) mRNA, complete cds [NM_105851]
A_84_P790894	-7.69006	-2.94299	7.69006	down	AT5G14510	Arabidopsis thaliana armadillo/beta-catenin-like repeat-containing protein (AT5G14510) mRNA, complete cds [NM_121455]
A_84_P504518	-2.28961	-1.1951	2.28961	down	AT1G13920	Arabidopsis thaliana Remorin family protein (AT1G13920) mRNA, complete cds [NM_101258]
A_84_P75574	-5.64105	-2.49596	5.64105	down	CLE20	Arabidopsis thaliana CLAVATA3/ESR-related protein 20 (CLE20) mRNA, complete cds [NM_148435]
A_84_P604601	-4.1738	-2.06136	4.1738	down	MEE69	Arabidopsis thaliana maternal effect embryo arrest 69 / hydrolase (MEE69) mRNA, complete cds [NM_119877]
A_84_P11827	-2.03683	-1.02633	2.03683	down	FTSZ2-2	Arabidopsis thaliana Tubulin/FtsZ family protein (FTSZ2-2) mRNA, complete cds [NM_115135]
A_84_P15978	-4.6536	-2.21835	4.6536	down	LAC17	Arabidopsis thaliana laccase 17 (LAC17) mRNA, complete cds [NM_125395]
A_84_P10786	-2.24295	-1.1654	2.24295	down	EMB1270	Arabidopsis thaliana pentatricopeptide repeat-containing protein (EMB1270) mRNA, complete cds [NM_112693]
A_84_P801329	-2.76211	-1.46577	2.76211	down	FLA2	Arabidopsis thaliana fasciclin-like arabinogalactan protein 2 (FLA2) mRNA, complete cds [NM_117342]
A_84_P509781	-5.27328	-2.3987	5.27328	down	AT2G20380	Arabidopsis thaliana F-box protein (AT2G20380) mRNA, complete cds [NM_127597]
A_84_P18354	-4.97058	-2.31341	4.97058	down	TOP6B	Arabidopsis thaliana DNA topoisomerase 6 subunit B (TOP6B) mRNA, complete cds [NM_112969]
A_84_P14500	-2.04506	-1.03214	2.04506	down	CYP86A8	Arabidopsis thaliana cytochrome P450, family 86, subfamily A, polypeptide 8 (CYP86A8) mRNA, complete cds [NM_130160]
A_84_P784578	-4.02709	-2.00974	4.02709	down	ENODL9	Arabidopsis thaliana early nodulin-like protein 9 (ENODL9) mRNA, complete cds [NM_112949]
A_84_P266910	-6.21417	-2.63556	6.21417	down	AT1G47655	Arabidopsis thaliana Dof zinc finger protein DOF1.6 (AT1G47655) mRNA, complete cds [NM_103658]
A_84_P137779	-5.94929	-2.57272	5.94929	down	AT4G30180	Arabidopsis thaliana transcription factor/ transcription regulator (AT4G30180) mRNA, complete cds [NM_119164]
A_84_P19987	-2.37183	-1.246	2.37183	down	AT1G52990	Arabidopsis thaliana thioesterase-like protein (AT1G52990) mRNA, complete cds [NM_104177]
A_84_P826316	-2.3334	-1.22243	2.3334	down	MYB60	Arabidopsis thaliana proto-oncogene protein (MYB60) mRNA, complete cds [NM_202066]
A_84_P826328	-2.46927	-1.30408	2.46927	down	AT3G53100	Arabidopsis thaliana GDSL esterase/lipase (AT3G53100) mRNA, complete cds [NM_115170]
A_84_P18313	-3.7577	-1.90985	3.7577	down	CYP77A6	Arabidopsis thaliana cytochrome P450, family 77, subfamily A, polypeptide 6 (CYP77A6) mRNA, complete cds [NM_111893]
A_84_P810343	-2.41729	-1.27339	2.41729	down	PBP1	Arabidopsis thaliana PYK10-binding protein 1 (PBP1) mRNA, complete cds [NM_001035633]
A_84_P305030	-2.03043	-1.02179	2.03043	down	ERD3	Arabidopsis thaliana putative methyltransferase PMT21 (ERD3) mRNA, complete cds [NM_118031]
A_84_P18355	-2.5231	-1.3352	2.5231	down	HYR1	Arabidopsis thaliana UDP-glycosyltransferase-like protein (HYR1) mRNA, complete cds [NM_113071]
A_84_P14568	-2.96446	-1.56777	2.96446	down	MPK19	Arabidopsis thaliana mitogen-activated protein kinase 19 (MPK19) mRNA, complete cds [NM_112333]
A_84_P19909	-22.78	-4.5097	22.78	down	YUC9	Arabidopsis thaliana YUCCA 9 protein (YUC9) mRNA, complete cds [NM_100299]
A_84_P542440	-4.13559	-2.04809	4.13559	down	AT5G23750	Arabidopsis thaliana Remorin family protein (AT5G23750) mRNA, complete cds [NM_122280]
A_84_P81769	-3.23867	-1.6954	3.23867	down	MCA1	Arabidopsis thaliana PLAC8 domain-containing protein (MCA1) mRNA, complete cds [NM_119759]
A_84_P815706	-2.17431	-1.12056	2.17431	down	AT5G39320	Arabidopsis thaliana putative UDP-glucose 6-dehydrogenase 2 (AT5G39320) mRNA, complete cds [NM_123294]
A_84_P812936	-7.28066	-2.86407	7.28066	down
A_84_P19952	-3.38509	-1.75919	3.38509	down	MAP70-4	Arabidopsis thaliana microtubule-associated proteins 70-4 (MAP70-4) mRNA, complete cds [NM_101353]
A_84_P222439	-7.66839	-2.93892	7.66839	down	FLA15	Arabidopsis thaliana fasciclin-like arabinogalactan protein 15 (FLA15) mRNA, complete cds [NM_115097]
A_84_P180484	-2.98012	-1.57537	2.98012	down	AT2G33570	Arabidopsis thaliana uncharacterized protein (AT2G33570) mRNA, complete cds [NM_128917]
A_84_P141159	-2.2431	-1.1655	2.2431	down	AT4G24790	Arabidopsis thaliana AAA-type ATPase family protein (AT4G24790) mRNA, complete cds [NM_001125574]
A_84_P753408	-4.64375	-2.21529	4.64375	down		Arabidopsis thaliana Full-length cDNA Complete sequence from clone GSLTLS42ZH01 of Adult vegetative tissue of strain col-0 of Arabidopsis thaliana (thale cress) [BX841821]
A_84_P76324	-2.09879	-1.06956	2.09879	down	AT1G31850	Arabidopsis thaliana putative methyltransferase PMT20 (AT1G31850) mRNA, complete cds [NM_102922]
A_84_P11465	-9.8557	-3.30096	9.8557	down	BOR5	Arabidopsis thaliana putative boron transporter 5 (BOR5) mRNA, complete cds [NM_106139]
A_84_P140529	-2.08161	-1.0577	2.08161	down	SPA3	Arabidopsis thaliana ubiquitin-protein ligase RFWD2 (SPA3) mRNA, complete cds [NM_148725]
A_84_P12054	-2.08558	-1.06045	2.08558	down	AT5G07580	Arabidopsis thaliana ERF/AP2 transcription factor (AT5G07580) mRNA, complete cds [NM_120840]
A_84_P823614	-4.09289	-2.03312	4.09289	down	AT1G51805	Arabidopsis thaliana leucine-rich repeat protein kinase-like protein (AT1G51805) mRNA, complete cds [NM_001198271]
A_84_P790686	-8.75387	-3.12992	8.75387	down	AT3G23460	Arabidopsis thaliana cyclopropane fatty acid synthase-related protein (AT3G23460) mRNA, complete cds [NM_113249]
A_84_P602726	-3.67635	-1.87828	3.67635	down	AT4G08455	Arabidopsis thaliana BTB/POZ domain-containing protein (AT4G08455) mRNA, complete cds [NM_148294]
A_84_P18819	-6.9674	-2.80062	6.9674	down	NRT2.3	Arabidopsis thaliana nitrate transporter 2.3 (NRT2.3) mRNA, complete cds [NM_125471]
A_84_P17302	-2.163	-1.11303	2.163	down	AT2G37790	Arabidopsis thaliana NAD(P)-linked oxidoreductase-like protein (AT2G37790) mRNA, complete cds [NM_129335]
A_84_P197454	-3.88088	-1.95638	3.88088	down	AT5G02550	Arabidopsis thaliana uncharacterized protein (AT5G02550) mRNA, complete cds [NM_120333]
A_84_P20864	-2.06037	-1.0429	2.06037	down	AK-HSDH I	Arabidopsis thaliana bifunctional aspartokinase/homoserine dehydrogenase 1 (AK-HSDH I) mRNA, complete cds [NM_102861]
A_84_P802603	-19.6253	-4.29464	19.6253	down	EMB3003	144791 CERES-148 Arabidopsis thaliana cDNA clone 113033 5', mRNA sequence [DR296753]
A_84_P22740	-5.60166	-2.48585	5.60166	down	AT1G77200	Arabidopsis thaliana ethylene-responsive transcription factor ERF037 (AT1G77200) mRNA, complete cds [NM_106369]
A_84_P124032	-3.51926	-1.81527	3.51926	down	COI1	Arabidopsis thaliana Coronatine-insensitive protein 1 (COI1) mRNA, complete cds [NM_129552]
A_84_P11734	-8.66735	-3.11559	8.66735	down	RPL15	Arabidopsis thaliana 50S ribosomal protein L15 (RPL15) mRNA, complete cds [NM_113496]
A_84_P562344	-2.12056	-1.08445	2.12056	down	AT2G20240	Arabidopsis thaliana uncharacterized protein (AT2G20240) mRNA, complete cds [NM_127583]
A_84_P12780	-2.11219	-1.07874	2.11219	down	AT1G42440	Arabidopsis thaliana uncharacterized protein (AT1G42440) mRNA, complete cds [NM_103432]
A_84_P571850	-2.01983	-1.01424	2.01983	down	AT1G05090	Arabidopsis thaliana dentin sialophosphoprotein-like protein (AT1G05090) mRNA, complete cds [NM_100388]
A_84_P22044	-2.4288	-1.28025	2.4288	down	MES7	Arabidopsis thaliana methyl esterase 7 (MES7) mRNA, complete cds [NM_127920]
A_84_P816975	-2.1897	-1.13073	2.1897	down
A_84_P20373	-2.19187	-1.13217	2.19187	down	AT3G61210	Arabidopsis thaliana S-adenosylmethionine-dependent methyltransferasedomain-containing protein (AT3G61210) mRNA, complete cds [NM_115985]
A_84_P829537	-2.53986	-1.34475	2.53986	down	AT4G13100	Arabidopsis thaliana RING/U-box domain-containing protein (AT4G13100) mRNA, complete cds [NM_117379]
A_84_P540345	-2.1496	-1.10407	2.1496	down	AT3G13845	Arabidopsis thaliana uncharacterized protein (AT3G13845) mRNA, complete cds [NM_112238]
A_84_P23329	-3.80563	-1.92813	3.80563	down	ENODL15	Arabidopsis thaliana early nodulin-like protein 15 (ENODL15) mRNA, complete cds [NM_119334]
A_84_P844514	-6.23723	-2.64091	6.23723	down	TCX2	Arabidopsis thaliana TESMIN/TSO1-like CXC 2 (TCX2) mRNA, complete cds [NM_117562]
A_84_P126091	-2.82621	-1.49887	2.82621	down	LACS2	Arabidopsis thaliana long-chain acyl-CoA synthetase 2 (LACS2) mRNA, complete cds [NM_103833]
A_84_P298204	-8.93092	-3.15881	8.93092	down	TBL36	Arabidopsis thaliana protein trichome birefringence-like 36 (TBL36) mRNA, complete cds [NM_115286]
A_84_P79045	-2.49906	-1.32139	2.49906	down	AT1G06980	Arabidopsis thaliana uncharacterized protein (AT1G06980) mRNA, complete cds [NM_100571]
A_84_P18613	-4.3105	-2.10786	4.3105	down	AT1G27120	Arabidopsis thaliana putative beta-1,3-galactosyltransferase 17 (AT1G27120) mRNA, complete cds [NM_102474]
A_84_P844786	-13.7001	-3.77612	13.7001	down	AT2G16890	Arabidopsis thaliana UDP-glycosyltransferase-like protein (AT2G16890) mRNA, complete cds [NM_127242]
A_84_P13979	-4.60447	-2.20304	4.60447	down	CAF2	Arabidopsis thaliana CRS2-associated factor 2 (CAF2) mRNA, complete cds [NM_102189]
A_84_P860758	-2.67417	-1.41909	2.67417	down		Rep: Polyubiquitin - Thlaspi caerulescens (Alpine penny-cress) (Thlaspi calaminare), partial (18%) [TC400668]
A_84_P850621	-2.2002	-1.13764	2.2002	down	BIM1	Arabidopsis thaliana transcription factor BIM1 (BIM1) mRNA, complete cds [NM_001203329]
A_84_P577310	-2.37499	-1.24792	2.37499	down	AT1G31720	Arabidopsis thaliana uncharacterized protein (AT1G31720) mRNA, complete cds [NM_102907]
A_84_P827553	-2.11245	-1.07892	2.11245	down	SNZ	Arabidopsis thaliana AP2-like ethylene-responsive transcription factor SNZ (SNZ) mRNA, complete cds [NM_179982]
A_84_P839524	-2.45371	-1.29497	2.45371	down		GB
A_84_P18847	-3.98577	-1.99486	3.98577	down	AT5G67430	Arabidopsis thaliana GCN5-related N-acetyltransferase (GNAT) family protein (AT5G67430) mRNA, complete cds [NM_126143]
A_84_P856656	-3.30465	-1.7245	3.30465	down		Rep: Probable mannitol dehydrogenase - Arabidopsis thaliana (Mouse-ear cress), partial (28%) [TC397454]
A_84_P85639	-2.46676	-1.30262	2.46676	down	AT3G24190	Arabidopsis thaliana aarF domain-containing kinase (AT3G24190) mRNA, complete cds [NM_113324]
A_84_P814626	-2.27912	-1.18848	2.27912	down
A_84_P845518	-3.98141	-1.99328	3.98141	down	AT4G11100	Arabidopsis thaliana uncharacterized protein (AT4G11100) mRNA, complete cds [NM_001084904]
A_84_P137739	-3.60872	-1.85149	3.60872	down	EDL3	Arabidopsis thaliana EID1-like F-box protein 3 (EDL3) mRNA, complete cds [NM_116171]
A_84_P525885	-2.31877	-1.21336	2.31877	down	AT1G53780	Arabidopsis thaliana 26S proteasome regulatory subunit T1 (AT1G53780) mRNA, complete cds [NM_001198287]
A_84_P11730	-2.19266	-1.13268	2.19266	down	UGT84A2	Arabidopsis thaliana sinapate 1-glucosyltransferase (UGT84A2) mRNA, complete cds [NM_113051]
A_84_P22799	-2.33467	-1.22322	2.33467	down	AT1G55760	Arabidopsis thaliana BTB/POZ domain-containing protein (AT1G55760) mRNA, complete cds [NM_104452]
A_84_P127211	-3.34389	-1.74153	3.34389	down	AT3G18960	Arabidopsis thaliana AP2/B3 domain-containing transcription factor (AT3G18960) mRNA, complete cds [NM_112782]
A_84_P839478	-6.30161	-2.65572	6.30161	down
A_84_P857488	-2.31685	-1.21216	2.31685	down	RPS11-BETA	Arabidopsis thaliana 40S ribosomal protein S11-3 (RPS11-BETA) mRNA, complete cds [NM_122279]
A_84_P804705	-2.23756	-1.16193	2.23756	down	PIN1AT	Arabidopsis thaliana Peptidyl-prolyl cis-trans isomerase Pin1 (PIN1AT) mRNA, complete cds [NM_127360]
A_84_P818130	-2.17041	-1.11797	2.17041	down	AT1G62610	Arabidopsis thaliana Rossmann-fold NAD(P)-binding domain-containing protein (AT1G62610) mRNA, complete cds [NM_001198365]
A_84_P524320	-5.8878	-2.55773	5.8878	down	AT2G40475	Arabidopsis thaliana uncharacterized protein (AT2G40475) mRNA, complete cds [NM_129609]
A_84_P23124	-2.13168	-1.09199	2.13168	down	GHS1	Arabidopsis thaliana ribosomal protein S21 family protein (GHS1) mRNA, complete cds [NM_113630]
A_84_P157425	-2.41717	-1.27332	2.41717	down	AT5G12470	Arabidopsis thaliana uncharacterized protein (AT5G12470) mRNA, complete cds [NM_121285]
A_84_P790332	-3.90353	-1.96478	3.90353	down	TCL1	Arabidopsis thaliana Full-length cDNA Complete sequence from clone GSLTFB10ZD06 of Flowers and buds of strain col-0 of Arabidopsis thaliana (thale cress) [BX818763]
A_84_P811154	-5.62516	-2.49189	5.62516	down	GH9C2	Arabidopsis thaliana endoglucanase 6 (GH9C2) mRNA, complete cds [NM_105114]
A_84_P23719	-6.61638	-2.72604	6.61638	down	MYB58	Arabidopsis thaliana myb domain protein 58 (MYB58) mRNA, complete cds [NM_101514]
A_84_P135745	-2.28293	-1.19089	2.28293	down	AT5G49215	Arabidopsis thaliana glycoside hydrolase family 28 protein / polygalacturonase (pectinase) family protein (AT5G49215) mRNA, complete cds [NM_148104]
A_84_P845982	-2.79572	-1.48322	2.79572	down	AT2G39900	Arabidopsis thaliana LIM domain-containing protein (AT2G39900) mRNA, complete cds [NM_129548]
A_84_P22695	-2.24874	-1.16912	2.24874	down	SUB	Arabidopsis thaliana protein STRUBBELIG (SUB) mRNA, complete cds [NM_100986]
A_84_P152828	-2.1487	-1.10347	2.1487	down	AT2G35470	Arabidopsis thaliana uncharacterized protein (AT2G35470) mRNA, complete cds [NM_129099]
A_84_P23000	-2.34135	-1.22734	2.34135	down	CRK1	Arabidopsis thaliana CDPK-related kinase 1 (CRK1) mRNA, complete cds [NM_129679]
A_84_P18447	-7.29026	-2.86597	7.29026	down	AT3G53190	Arabidopsis thaliana putative pectate lyase 12 (AT3G53190) mRNA, complete cds [NM_115179]
A_84_P845669	-2.0821	-1.05804	2.0821	down
A_84_P20924	-2.46313	-1.30049	2.46313	down	AT1G18460	Arabidopsis thaliana alpha/beta-hydrolase-like protein (AT1G18460) mRNA, complete cds [NM_101703]
A_84_P827173	-2.40698	-1.26722	2.40698	down	AT1G79630	Arabidopsis thaliana putative protein phosphatase 2C 18 (AT1G79630) mRNA, complete cds [NM_202451]
A_84_P14901	-2.14369	-1.1001	2.14369	down	AT5G11450	Arabidopsis thaliana PsbP domain-containing protein 5 (AT5G11450) mRNA, complete cds [NM_121183]
A_84_P200434	-3.04578	-1.60681	3.04578	down	AT4G20170	Arabidopsis thaliana uncharacterized protein (AT4G20170) mRNA, complete cds [NM_118136]
A_84_P11071	-2.00461	-1.00333	2.00461	down	AAE14	Arabidopsis thaliana acyl-activating enzyme 14 (AAE14) mRNA, complete cds [NM_102789]
A_84_P569474	-3.59701	-1.8468	3.59701	down	AT2G27385	Arabidopsis thaliana Pollen Ole e 1 allergen and extensin family protein (AT2G27385) mRNA, complete cds [NM_179769]
A_84_P863203	-3.1575	-1.65878	3.1575	down		Rep: Classical arabinogalactan protein 9 precursor - Arabidopsis thaliana (Mouse-ear cress), partial (36%) [TC406259]
A_84_P831967	-4.38084	-2.13121	4.38084	down	MRP10	Arabidopsis thaliana ABC transporter C family member 14 (MRP10) mRNA, complete cds [NM_116135]
A_84_P10985	-6.46583	-2.69284	6.46583	down	AT1G29200	Arabidopsis thaliana O-fucosyltransferase-like protein (AT1G29200) mRNA, complete cds [NM_001123905]
A_84_P21659	-2.16466	-1.11414	2.16466	down	AT1G55360	Arabidopsis thaliana uncharacterized protein (AT1G55360) mRNA, complete cds [NM_104412]
A_84_P512684	-2.49405	-1.31849	2.49405	down	AT2G06904	Arabidopsis thaliana nucleic acid / zinc ion binding protein (AT2G06904) mRNA, complete cds [NM_147260]
A_84_P863188	-4.36716	-2.12669	4.36716	down
A_84_P832028	-2.36101	-1.23941	2.36101	down	GT18	Arabidopsis thaliana glycosyltransferase 18 (GT18) mRNA, complete cds [NM_125616]
A_84_P23352	-2.39204	-1.25824	2.39204	down	AT4G38050	Arabidopsis thaliana nucleobase-ascorbate transporter 11 (AT4G38050) mRNA, complete cds [NM_119966]
A_84_P113382	-8.10559	-3.01892	8.10559	down	AT3G23930	Arabidopsis thaliana uncharacterized protein (AT3G23930) mRNA, complete cds [NM_113298]
A_84_P12431	-3.44397	-1.78407	3.44397	down	FUT3	Arabidopsis thaliana fucosyltransferase 3 (FUT3) mRNA, complete cds [NM_202413]
A_84_P244235	-3.99791	-1.99925	3.99791	down	AT3G20810	Arabidopsis thaliana transcription factor jumonji (jmjC) domain-containing protein (AT3G20810) mRNA, complete cds [NM_001035656]
A_84_P12512	-3.55669	-1.83053	3.55669	down	VLN1	Arabidopsis thaliana villin-1 (VLN1) mRNA, complete cds [NM_001202706]
A_84_P787617	-2.70025	-1.43309	2.70025	down	AT5G03270	Arabidopsis thaliana putative cytokinin riboside 5'-monophosphate phosphoribohydrolase LOG6 (AT5G03270) mRNA, complete cds [NM_120405]
A_84_P13770	-2.04507	-1.03215	2.04507	down	AT4G01130	Arabidopsis thaliana GDSL esterase/lipase (AT4G01130) mRNA, complete cds [NM_116343]
A_84_P22024	-2.18969	-1.13073	2.18969	down	OBP2	Arabidopsis thaliana Dof zinc finger protein DOF1.1 (OBP2) mRNA, complete cds [NM_001035911]
A_84_P523727	-8.31538	-3.05578	8.31538	down	AT4G31680	Arabidopsis thaliana B3 domain-containing protein REM8 (AT4G31680) mRNA, complete cds [NM_119317]
A_84_P555846	-2.34713	-1.2309	2.34713	down	AT5G65030	Arabidopsis thaliana uncharacterized protein (AT5G65030) mRNA, complete cds [NM_125902]
A_84_P12011	-4.31381	-2.10896	4.31381	down	MIPS1	Arabidopsis thaliana inositol-3-phosphate synthase isozyme 1 (MIPS1) mRNA, complete cds [NM_120143]
A_84_P847330	-2.11401	-1.07998	2.11401	down	PHS2	Arabidopsis thaliana alpha-glucan phosphorylase isozyme H (PHS2) mRNA, complete cds [NM_114564]
A_84_P17718	-3.00235	-1.58609	3.00235	down	AT5G05630	Arabidopsis thaliana Amino acid permease family protein (AT5G05630) mRNA, complete cds [NM_120645]
A_84_P514027	-2.72059	-1.44392	2.72059	down	AT5G11990	Arabidopsis thaliana proline-rich family protein (AT5G11990) mRNA, complete cds [NM_121237]
A_84_P812089	-2.37397	-1.2473	2.37397	down	AT3G18890	Arabidopsis thaliana Rossmann-fold NAD(P)-binding domain-containing protein (AT3G18890) mRNA, complete cds [NM_112775]
A_84_P287650	-2.10955	-1.07693	2.10955	down	AT3G06590	Arabidopsis thaliana transcription factor bHLH148 (AT3G06590) mRNA, complete cds [NM_111535]
A_84_P137439	-2.88416	-1.52815	2.88416	down	PAR2	Arabidopsis thaliana phy rapidly regulated 2 protein (PAR2) mRNA, complete cds [NM_115747]
A_84_P825910	-2.14342	-1.09991	2.14342	down		Rep: Aquaporin NIP6-1 - Arabidopsis thaliana (Mouse-ear cress), partial (68%) [TC387113]
A_84_P286540	-2.01876	-1.01347	2.01876	down		tc
A_84_P24170	-2.33274	-1.22202	2.33274	down	AT4G00040	Arabidopsis thaliana chalcone synthase 2-like protein (AT4G00040) mRNA, complete cds [NM_116221]
A_84_P150668	-2.27835	-1.18799	2.27835	down	PDR1	Arabidopsis thaliana ABC transporter G family member 29 (PDR1) mRNA, complete cds [NM_112505]
A_84_P22943	-6.03871	-2.59424	6.03871	down	CYP712A1	Arabidopsis thaliana cytochrome P450, family 712, subfamily A, polypeptide 1 (CYP712A1) mRNA, complete cds [NM_129787]
A_84_P15989	-3.28241	-1.71476	3.28241	down	AT5G62350	Arabidopsis thaliana invertase/pectin methylesterase inhibitor family protein / DC 1.2-like protein (AT5G62350) mRNA, complete cds [NM_125629]
A_84_P838695	-4.44345	-2.15168	4.44345	down	AT1G10380	Arabidopsis thaliana Putative membrane lipoprotein (AT1G10380) mRNA, complete cds [NM_100912]
A_84_P838708	-2.53134	-1.3399	2.53134	down	AT1G20870	Arabidopsis thaliana alpha-crystallin domain of heat shock protein-containing protein (AT1G20870) mRNA, complete cds [NM_101940]
A_84_P184024	-2.22188	-1.15178	2.22188	down	AT2G37100	Arabidopsis thaliana protamine P1 family protein (AT2G37100) mRNA, complete cds [NM_129266]
A_84_P137179	-2.59466	-1.37555	2.59466	down	AT5G62550	Arabidopsis thaliana uncharacterized protein (AT5G62550) mRNA, complete cds [NM_125649]
A_84_P233209	-3.86036	-1.94873	3.86036	down	AT5G05060	Arabidopsis thaliana cystatin/monellin-related protein (AT5G05060) mRNA, complete cds [NM_120588]
A_84_P760471	-2.6366	-1.39868	2.6366	down	IAA7	Arabidopsis thaliana auxin-responsive protein IAA7 (IAA7) mRNA, complete cds [NM_202626]
A_84_P10579	-19.9014	-4.3148	19.9014	down	LUP1	Arabidopsis thaliana lupeol synthase 1 (LUP1) mRNA, complete cds [NM_106546]
A_84_P23463	-2.14368	-1.10009	2.14368	down	AT5G37760	Arabidopsis thaliana chaperone DnaJ-domain containing protein (AT5G37760) mRNA, complete cds [NM_123135]
A_84_P855865	-2.74523	-1.45693	2.74523	down	XTH4	Arabidopsis thaliana xyloglucan endotransglucosylase/hydrolase protein 4 (XTH4) mRNA, complete cds [NM_126666]
A_84_P19626	-2.34803	-1.23145	2.34803	down	DOT3	Arabidopsis thaliana Phototropic-responsive NPH3 family protein (DOT3) mRNA, complete cds [NM_121063]
A_84_P537312	-3.14585	-1.65345	3.14585	down	AT1G08160	Arabidopsis thaliana late embryogenesis abundant hydroxyproline-rich glycoprotein (AT1G08160) mRNA, complete cds [NM_179281]
A_84_P11569	-15.955	-3.99594	15.955	down	EXPA8	Arabidopsis thaliana expansin A8 (EXPA8) mRNA, complete cds [NM_129623]
A_84_P827727	-2.22663	-1.15486	2.22663	down	GNC	Arabidopsis thaliana GATA transcription factor 21 (GNC) mRNA, complete cds [NM_125069]
A_84_P804030	-3.035	-1.6017	3.035	down	HSFC1	AYAKP52TF pooled cDNA populations Arabidopsis thaliana cDNA, mRNA sequence [EG418394]
A_84_P293884	-2.3429	-1.2283	2.3429	down	AT1G21140	Arabidopsis thaliana Vacuolar iron transporter-like protein (AT1G21140) mRNA, complete cds [NM_101968]
A_84_P20881	-2.57692	-1.36565	2.57692	down	RSH3	Arabidopsis thaliana protein root hair specific 3 (RSH3) mRNA, complete cds [NM_101510]
A_84_P829697	-3.68265	-1.88074	3.68265	down	CDKB1;2	Arabidopsis thaliana cyclin-dependent kinase B1-2 (CDKB1;2) mRNA, complete cds [NM_129419]
A_84_P597910	-7.31127	-2.87012	7.31127	down	SOFL2	Arabidopsis thaliana SOB five-like 2 protein (SOFL2) mRNA, complete cds [NM_105560]
A_84_P555902	-3.27394	-1.71103	3.27394	down	AT1G05540	Arabidopsis thaliana uncharacterized protein (AT1G05540) mRNA, complete cds [NM_100433]
A_84_P23039	-3.24305	-1.69735	3.24305	down	AT3G09160	Arabidopsis thaliana RNA recognition motif-containing protein (AT3G09160) mRNA, complete cds [NM_111751]
A_84_P18795	-3.31812	-1.73037	3.31812	down	ATK3	Arabidopsis thaliana kinesin 3 (ATK3) mRNA, complete cds [NM_124848]
A_84_P870733	-2.70224	-1.43416	2.70224	down	AT2G44670	Arabidopsis thaliana uncharacterized protein (AT2G44670) mRNA, complete cds [NM_130031]
A_84_P582082	-4.04669	-2.01674	4.04669	down	AT3G16370	Arabidopsis thaliana GDSL esterase/lipase APG (AT3G16370) mRNA, complete cds [NM_112508]
A_84_P91139	-3.20039	-1.67825	3.20039	down	TBL3	Arabidopsis thaliana uncharacterized protein (TBL3) mRNA, complete cds [NM_120214]
A_84_P568000	-12.62	-3.65764	12.62	down	AT4G20940	Arabidopsis thaliana leucine-rich receptor-like protein kinase (AT4G20940) mRNA, complete cds [NM_118212]
A_84_P23427	-4.3982	-2.13691	4.3982	down	MYB43	Arabidopsis thaliana myb domain protein 43 (MYB43) mRNA, complete cds [NM_121666]
A_84_P750407	-2.35028	-1.23283	2.35028	down	CRR23	Arabidopsis thaliana inorganic carbon transport protein-related protein (CRR23) mRNA, complete cds [NM_105744]
A_84_P17393	-2.08488	-1.05997	2.08488	down	ATA20	Arabidopsis thaliana anther 20 (ATA20) mRNA, complete cds [NM_112408]
A_84_P20957	-5.36162	-2.42267	5.36162	down	GH9C2	Arabidopsis thaliana endoglucanase 6 (GH9C2) mRNA, complete cds [NM_105114]
A_84_P829045	-4.4894	-2.16652	4.4894	down	FMO GS-OX2	Arabidopsis thaliana flavin-containing monooxygenase FMO GS-OX2 (FMO GS-OX2) mRNA, complete cds [NM_104933]
A_84_P810593	-5.6979	-2.51043	5.6979	down	MLP423	Arabidopsis thaliana MLP-like protein 423 (MLP423) mRNA, complete cds [NM_102249]
[truncated: 4,989 more rows]

## Sheet: 2 W
ProbeName	FC ([2w TG] vs [2w WT])	Log FC ([2w TG] vs [2w WT])	FC (abs) ([2w TG] vs [2w WT])	Regulation ([2w TG] vs [2w WT])	GeneSymbol	Description
[truncated: 2,967 more rows]

[truncated: 1 more sheets: 3 W]
